# Supplementary material for: FMRP regulates mRNAs encoding distinct functions in the cell body and dendrites of CA1 pyramidal neurons
Source: eLife. 2021 Dec 23;10:e71892. doi: 10.7554/eLife.71892 (PMC8820740; doi:10.7554/eLife.71892)
Supplement: Supplementary file 1. — (A) Dendrite-present mRNAs results of DESeq2 analysis. ‘Neuropil_vs_CB’ indicates results of CA1 neuropil/CA1 cell bodies TRAP comparison, ‘TRAP_vs_RNAseq’ indicates results of CA1 neuropil TRAP/CA1 neuropil RNAseq comparison. ‘CrePos_vs_CreNeg’ indicates results of Camk2a-Cre-positive CA1 neuropil TRAP/Camk2a-Cre-negative CA1 neuropil TRAP comparison. (B) Dendrite-enriched mRNAs results of DESeq2 analysis. ‘Neuropil_vs_CB’ indicates results of CA1 neuropil/CA1 cell bodies TRAP comparison, ‘TRAP_vs_RNAseq’ indicates results of CA1 neuropil TRAP/CA1 neuropil RNAseq comparison. ‘CrePos_vs_CreNeg’ indicates results of Camk2a-Cre-positive CA1 neuropil TRAP/Camk2a-Cre-negative CA1 neuropil TRAP comparison. (C) RNAscope probes used in this study. (D) DEXSeq analysis of differentially localized 3′UTR isoforms. Results of DEXSeq analysis comparing 3′UTR expression in CA1 neuropil and cell bodies TRAP is shown. APA event types are indicated (APA type), and the relative location (UTR type) of the 3′UTR-APA UTRs is indicated. Genomic coordinates for mm10 are given. (E) rMATs analysis of differentially localized AS events. Results of rMATs analysis comparing alternative splice events from CA1 neuropil vs. cell bodies TRAP. Results are organized by event type, and coordinates of the exons involved in the splice event are given. (F) RNABP KO data used for splicing analysis. Description of RNA-seq data used for analysis of RNABP KO data in mouse brain. (G) Compartment-specific FMRP-CLIP scores. All CA1-expressing genes with detectable FMRP binding in the CA1 cell bodies and dendrites were assigned a compartment-specific FMRP-CLIP score. (H) dendritic FMRP targets. (I) FMRP target functional clusters. Whole-cell FMRP targets were divided into functional clusters by the HumanBase software. Three clusters had >100 genes. The gene names for those clusters are shown here. (J) ASD SFARI genes functional clusters. Potential ASD genes (from SFARI) were divided into functional clusters by [file elife-71892-supp1.xlsx]

## Sheet: Descriptions
Supplementary file 1A: dendrite-present mRNAs
results of DESeq2 analysis. "Neuropil_vs_CB" indicates results of CA1 neuropil / CA1 cell bodies TRAP comparison, "TRAP_vs_RNAseq" indicates results of CA1 neuropil TRAP / CA1 neuropil RNAseq comparison. "CrePos_vs_CreNeg" indicates results of Camk-Cre positive CA1 neuropil TRAP / Camk-Cre negative CA1 neuropil TRAP comparison
Supplementary file 1B: dendrite-enriched mRNAs
results of DESeq2 analysis. "Neuropil_vs_CB" indicates results of CA1 neuropil / CA1 cell bodies TRAP comparison, "TRAP_vs_RNAseq" indicates results of CA1 neuropil TRAP / CA1 neuropil RNAseq comparison. "CrePos_vs_CreNeg" indicates results of Camk-Cre positive CA1 neuropil TRAP / Camk-Cre negative CA1 neuropil TRAP comparison
Supplementary file 1C: RNAscope probes used in this study
Supplementary file 1D: DEXseq analysis of differentially localized 3'UTR isoforms
Results of DEXseq analysis comparison 3'UTR expression in CA1 neuropil and cell bodies TRAP is shown. APA event types are indicated (APA type), and the relative location (UTR type) of the 3'UTR-APA UTRs is indicated. Genomic coordinates for mm10 are given.
Supplementary file 1E: rMATs analysis of differentially localized AS events
Results of rMATs analysis comparing alternative splice events from CA1 neuropil vs cell bodies TRAP. Results are organized by event type, and coordinates of the exons involved in the splice event are given.
Supplementary file 1F: RNABP KO data used for splicing analysis
Description of RNA-seq data used for analysis of RNABP KO data in mouse brain.
Supplementary file 1G: Compartment-specific FMRP-CLIP scores
All CA1-expressing genes with detectable FMRP binding in the CA1 cell bodies and dendrites were assigned a compartment-specific FMRP-CLIP score.
Supplementary file 1H: dendritic FMRP targets
Supplementary file 1I: FMRP target functional clusters
Whole-cell FMRP targets were divided into functional clusters by the HumanBase software. Three clusters had > 100 genes. The gene names for those clusters are shown here.
Supplementary file 1J: ASD SFARI genes functional clusters
Potential ASD genes (from SFARI) were divided into functional clusters by the HumanBase software. Four clusters had > 100 genes. The gene names for those clusters are shown here.
Supplementary file 1K: DESeq2 analysis for FMRP KO vs WT TRAP
results of DESeq2 analysis. "Localization" indicates results of CA1 neuropil / CA1 cell bodies TRAP, FMRP KO / WT comparison, "CB_only" indicates results of CA1 cell bodies TRAP only, FMRP KO / WT. "Neuropil_only" indicates results of CA1 neuropil TRAP only, FMRP KO/WT comparison

## Sheet: Table S1 dendrite-present mRNAs
Gene Symbol	log2FoldChange.Neuropil_vs_CB	stat.Neuropil_vs_CB	pvalue.Neuropil_vs_CB	padj.Neuropil_vs_CB	log2FoldChange.TRAP_vs_RNAseq	stat.TRAP_vs_RNAseq	pvalue.TRAP_vs_RNAseq	padj.TRAP_vs_RNAseq	log2FoldChange.CreNeg_vs_CrePos	stat.CreNeg_vs_CrePos	pvalue.CreNeg_vs_CrePos	padj.CreNeg_vs_CrePos
Dlgap3	4.22352	46.6858	0	0	2.00439	12.0301	2.46811e-33	1.57423e-31	1.99765	15.5096	2.98886e-54	1.09929e-51
Rasl10b	4.48331	43.722	0	0	1.14334	7.38502	1.52433e-13	2.34062e-12	1.3186	10.6956	1.06712e-26	6.32436e-25
Ppp1r9b	3.95737	43.2228	0	0	0.973127	6.73413	1.64918e-11	2.06822e-10	1.75466	13.933	3.99233e-44	8.18427e-42
Tmcc2	4.06501	40.043	0	0	1.4849	9.22259	2.9002e-20	7.72802e-19	1.55335	12.8379	1.00549e-37	1.39707e-35
Palm	4.27705	39.9868	0	0	2.02372	12.4656	1.14972e-35	8.85599e-34	2.20988	14.8517	6.77899e-50	2.11928e-47
Map3k10	3.78257	39.3894	0	0	1.40572	8.64764	5.25739e-18	1.19337e-16	1.53721	10.7102	9.11667e-27	5.45474e-25
Nsmf	4.39024	39.3573	0	0	1.93692	11.7159	1.05679e-31	6.08022e-30	2.09863	14.3301	1.41851e-46	3.2849e-44
Neurl1a	4.14761	38.5485	0	0	2.02896	12.189	3.55799e-34	2.43463e-32	1.82066	14.3245	1.53919e-46	3.49955e-44
Ttbk1	3.92908	38.3725	0	0	2.3186	13.9512	3.09246e-44	4.73819e-42	1.78089	10.3903	2.74515e-25	1.48606e-23
Ddn	3.88503	38.3695	0	0	1.4854	10.2511	1.16974e-24	4.23875e-23	1.80847	14.0531	7.36882e-45	1.61662e-42
Shank1	4.26164	37.9921	0	0	2.10605	13.1328	2.13628e-39	2.15093e-37	1.81575	11.1315	8.81584e-29	5.92699e-27
Shank3	3.90786	37.7873	0	0	2.063	14.4009	5.10687e-47	9.22903e-45	1.84512	14.1768	1.27461e-45	2.84625e-43
Psd	3.72746	37.3779	8.93197e-306	7.10655e-303	1.87022	12.4325	1.7401e-35	1.33307e-33	2.06046	15.3134	6.21797e-53	2.1015e-50
Agap2	3.38313	37.2074	5.17924e-303	3.91473e-300	2.3132	15.7754	4.59428e-56	1.57954e-53	2.10129	12.9207	3.43858e-38	4.8863e-36
Arhgap33	3.86762	37.1232	1.18718e-301	8.54603e-299	2.16307	13.394	6.55435e-41	7.21798e-39	2.25024	13.5632	6.61694e-42	1.18207e-39
Prrc2a	3.85287	36.9679	3.76136e-299	2.58457e-296	2.43954	15.5163	2.69211e-54	8.43288e-52	2.29729	15.754	6.44597e-56	2.68689e-53
Brsk1	3.89152	36.7671	6.19801e-296	4.07371e-293	1.52237	9.28363	1.63795e-20	4.49195e-19	1.61422	13.0129	1.03281e-38	1.51945e-36
Mllt6	4.05359	36.6774	1.67503e-294	1.05506e-291	1.48233	10.067	7.73221e-24	2.70455e-22	1.00859	9.45667	3.17902e-21	1.26604e-19
Zfpm1	3.91083	36.5513	1.70311e-292	1.02984e-289	2.17376	13.0691	4.94226e-39	4.91259e-37	2.44717	18.6495	1.27531e-77	7.9739e-74
Camk2a	4.3447	36.4365	1.12355e-290	6.53255e-288	3.00518	19.0577	5.67656e-81	1.00021e-77	2.21625	12.2656	1.3865e-34	1.4819e-32
Snph	4.06001	35.6585	1.73771e-278	9.72926e-276	2.1894	12.9263	3.19963e-38	2.98688e-36	2.09666	15.0174	5.64485e-51	1.8576e-48
Crtc1	3.93365	35.6201	6.84449e-278	3.69529e-275	2.69655	17.3894	9.93035e-68	6.99891e-65	2.57289	15.9732	1.96305e-57	1.02216e-54
Dact3	3.90855	35.2241	8.56132e-272	4.46281e-269	1.72803	9.92157	3.35425e-23	1.13114e-21	1.64574	12.035	2.32505e-33	2.28935e-31
Git1	3.56933	34.9793	4.64185e-268	2.33903e-265	1.86798	11.5496	7.41249e-31	4.03422e-29	2.03272	16.6912	1.51944e-62	1.46159e-59
Ncs1	3.92338	34.232	8.07788e-257	3.81604e-254	1.89568	12.1098	9.37307e-34	6.26175e-32	1.9188	16.2515	2.17936e-59	1.36265e-56
Zc3h7b	3.87597	34.1574	1.03999e-255	4.76408e-253	1.0728	6.78814	1.13585e-11	1.44372e-10	1.70261	9.69018	3.3194e-22	1.4363e-20
Mllt1	3.91923	34.1497	1.34984e-255	6.00161e-253	1.7537	10.596	3.10981e-26	1.24181e-24	1.67896	10.6696	1.41215e-26	8.29061e-25
Chd3	3.25241	33.8993	6.81333e-252	2.86103e-249	1.75611	13.0655	5.18376e-39	5.10981e-37	1.9494	13.4424	3.41095e-41	5.61235e-39
Pcbp4	3.73207	33.7325	1.92778e-249	7.87629e-247	1.04966	7.10828	1.17498e-12	1.66625e-11	1.42485	11.3838	5.03469e-30	3.72537e-28
Pitpnm1	3.54389	33.6738	1.39916e-248	5.56608e-246	2.47304	15.6489	3.38089e-55	1.08311e-52	1.87419	14.9157	2.60631e-50	8.3569e-48
Eef2	3.76127	33.6418	4.11453e-248	1.59486e-245	1.72444	10.4205	1.99838e-25	7.67553e-24	1.3746	9.50074	2.08403e-21	8.40672e-20
Gng7	4.231	33.364	4.5688e-244	1.68455e-241	1.13126	7.33217	2.2646e-13	3.43245e-12	2.2027	12.7864	1.95346e-37	2.62667e-35
Cep170b	3.25562	33.2726	9.62085e-243	3.46282e-240	2.17811	12.9094	3.98146e-38	3.66814e-36	1.61106	8.56498	1.08093e-17	3.18797e-16
Tnk2	3.23182	32.8497	1.15165e-236	3.86879e-234	1.90936	12.6564	1.03167e-36	8.45488e-35	1.69731	16.2144	3.98742e-59	2.37441e-56
Zmiz2	3.33049	32.4705	2.78599e-231	8.77414e-229	1.73015	10.092	5.9955e-24	2.10755e-22	1.93222	13.6622	1.70715e-42	3.09389e-40
Panx2	3.36968	32.316	4.17469e-229	1.28793e-226	1.3571	9.1617	5.10873e-20	1.32865e-18	1.68942	9.35275	8.53964e-21	3.24584e-19
Cic	3.11819	32.1693	4.74093e-227	1.40527e-224	2.04942	13.069	4.94884e-39	4.91259e-37	1.94452	14.3796	6.95018e-47	1.77371e-44
Iqsec3	3.72657	32.0376	3.26693e-225	9.49734e-223	1.90662	11.7381	8.12742e-32	4.69525e-30	1.62662	8.94114	3.85161e-19	1.31238e-17
Hcn2	3.3316	31.9352	8.66029e-224	2.47014e-221	1.72356	10.0274	1.15552e-23	3.99219e-22	1.73855	12.4647	1.16305e-35	1.38513e-33
Tbkbp1	3.79048	31.8255	2.87283e-222	8.04234e-220	1.29373	8.07104	6.97044e-16	1.32598e-14	1.17809	9.42855	4.15789e-21	1.62483e-19
Rpsa	3.6136	31.8065	5.27023e-222	1.44855e-219	0.51232	3.22714	0.00125033	0.00499281	1.58489	11.2184	3.31183e-29	2.3008e-27
Wdtc1	3.61063	31.7331	5.43688e-221	1.46767e-218	1.857	11.3812	5.18839e-30	2.63078e-28	1.57764	9.56693	1.10122e-21	4.60562e-20
Nfic	3.56086	31.694	1.88128e-220	4.98934e-218	1.2831	8.50064	1.88543e-17	4.15267e-16	1.06861	8.10179	5.4158e-16	1.40799e-14
Cabp7	3.98795	31.6172	2.14064e-219	5.57933e-217	1.73063	9.84262	7.3763e-23	2.41244e-21	1.84477	12.1329	7.06808e-34	7.30465e-32
Kifc2	3.52485	31.5661	1.0773e-218	2.76026e-216	1.19907	8.5943	8.37757e-18	1.88042e-16	1.88641	14.7614	2.59945e-49	7.73955e-47
Zfp523	3.89076	30.8699	3.02508e-209	7.49675e-207	1.51977	9.72217	2.4256e-22	7.63196e-21	1.63165	11.4503	2.34432e-30	1.80961e-28
Sgsm2	3.66011	30.8485	5.86422e-209	1.42983e-206	1.77705	10.4339	1.73666e-25	6.74379e-24	1.71083	12.6058	1.96105e-36	2.45229e-34
Neurl1b	3.71163	30.7902	3.54132e-208	8.49747e-206	2.32459	12.9473	2.43353e-38	2.30221e-36	1.54339	8.13543	4.10467e-16	1.08748e-14
Scaf1	3.0858	30.7784	5.10016e-208	1.20467e-205	2.25682	14.6129	2.32427e-48	4.61449e-46	1.47966	8.89542	5.81962e-19	1.93036e-17
Cbx6	3.27733	30.7724	6.13376e-208	1.42652e-205	2.43386	15.0898	1.89045e-51	4.67504e-49	2.13717	16.306	8.94221e-60	6.21235e-57
Abhd17a	3.55494	30.7542	1.07535e-207	2.46305e-205	1.32626	7.06742	1.57842e-12	2.20509e-11	1.87228	11.5168	1.08516e-30	8.69868e-29
Csnk1g2	3.58865	30.6926	7.15537e-207	1.5907e-204	1.18963	7.0419	1.89641e-12	2.62592e-11	1.66838	11.4494	2.36818e-30	1.81681e-28
Dgkz	3.11362	30.5598	4.19469e-205	9.05873e-203	2.60545	16.2666	1.70268e-59	8.00032e-57	2.33144	16.3802	2.64971e-60	2.07091e-57
Ppp1r16b	3.90792	30.5365	8.535e-205	1.81723e-202	1.49051	9.23196	2.65735e-20	7.10778e-19	1.36848	8.39658	4.59685e-17	1.30348e-15
D430019H16Rik	3.62736	30.3178	6.67103e-202	1.40064e-199	1.88604	12.2256	2.26874e-34	1.58318e-32	2.05407	16.4949	3.98986e-61	3.32621e-58
Mapk8ip1	3.35378	30.0833	8.00134e-199	1.61275e-196	1.68913	10.4424	1.58691e-25	6.18907e-24	1.99052	15.8767	9.18841e-57	4.41927e-54
Jph4	3.31166	29.8851	3.07057e-196	6.02828e-194	1.98781	12.919	3.51584e-38	3.26048e-36	2.08706	13.4175	4.77739e-41	7.75861e-39
Jph3	2.93764	29.8279	1.69731e-195	3.24787e-193	1.71063	10.7807	4.2459e-27	1.79192e-25	2.01698	13.5145	1.28385e-41	2.19925e-39
Rnf10	3.03278	29.8161	2.41723e-195	4.56765e-193	1.05429	7.15248	8.52252e-13	1.23088e-11	1.82775	12.7678	2.48128e-37	3.23653e-35
Pitpnm2	3.03252	29.7622	1.20583e-194	2.25044e-192	1.99844	13.4239	4.38067e-41	4.8622e-39	1.40951	11.9731	4.91691e-33	4.623e-31
Mgll	3.61922	29.7355	2.67356e-194	4.9288e-192	0.552583	3.77242	0.000161673	0.00079991	0.461584	3.19093	0.00141818	0.00755293
Abhd8	3.33593	29.7058	6.46156e-194	1.17686e-191	1.86506	10.8191	2.79588e-27	1.1979e-25	1.91971	17.1994	2.68345e-66	4.79379e-63
Tmem151b	3.1339	29.6119	1.04876e-192	1.88738e-190	1.61978	9.35215	8.58872e-21	2.39262e-19	1.68374	10.2247	1.53704e-24	7.56721e-23
Kcnab2	3.25565	29.5403	8.74131e-192	1.55462e-189	2.82042	17.5668	4.425e-69	3.6691e-66	2.34613	15.983	1.67879e-57	9.12749e-55
Maz	3.15908	29.3838	8.85776e-190	1.55701e-187	1.37672	9.73464	2.14569e-22	6.78731e-21	1.64255	10.8327	2.40968e-27	1.48438e-25
Fbxl16	3.43752	29.3489	2.46461e-189	4.28247e-187	1.85434	12.1019	1.03222e-33	6.86332e-32	2.2301	16.253	2.12642e-59	1.36265e-56
Sbk1	3.37395	29.2868	1.52763e-188	2.62423e-186	1.65832	10.2545	1.1295e-24	4.10346e-23	1.44446	9.25081	2.22808e-20	8.367e-19
Begain	3.39796	28.8858	1.79929e-183	3.05616e-181	1.94659	11.56	6.56768e-31	3.61633e-29	1.97396	16.6981	1.35371e-62	1.41068e-59
Ajm1	3.05489	28.8554	4.33965e-183	7.28917e-181	2.29935	13.6685	1.56627e-42	2.20781e-40	2.21892	11.6691	1.83283e-31	1.61055e-29
Shank2	3.23411	28.8379	7.19641e-183	1.19547e-180	2.39604	13.4506	3.05361e-41	3.47127e-39	1.72221	7.54708	4.45121e-14	9.90435e-13
Ehmt2	2.88368	28.7405	1.19163e-181	1.95803e-179	2.04441	12.3497	4.88943e-35	3.64663e-33	1.87559	13.8015	2.49447e-43	4.79897e-41
Tbc1d16	3.80422	28.6161	4.23572e-180	6.88509e-178	1.42887	8.32187	8.65872e-17	1.80552e-15	1.35387	8.2607	1.44823e-16	3.97152e-15
Sipa1l1	3.15461	28.6021	6.33545e-180	1.01886e-177	1.44279	9.2699	1.86313e-20	5.07001e-19	1.76752	9.94862	2.55701e-23	1.15019e-21
Pak6	3.48788	28.464	3.26953e-178	5.14849e-176	1.87645	12.2239	2.31697e-34	1.60887e-32	1.88729	10.7016	1.00084e-26	5.95975e-25
Dab2ip	3.13792	28.3429	1.02269e-176	1.59382e-174	2.24687	13.6663	1.61295e-42	2.24423e-40	2.24776	15.7786	4.36555e-56	1.88246e-53
Epn1	3.00662	28.3285	1.53919e-176	2.37428e-174	1.59076	10.091	6.05545e-24	2.12332e-22	2.15451	21.0623	1.76234e-98	2.20381e-94
Adcy5	3.33466	28.1708	1.33186e-174	2.01337e-172	1.48401	8.67635	4.08674e-18	9.33657e-17	1.45048	9.2438	2.37899e-20	8.90696e-19
Ube3b	3.49163	28.104	8.74487e-174	1.30887e-171	1.78127	10.9054	1.08583e-27	4.84365e-26	1.72825	11.9482	6.63486e-33	6.19171e-31
Tesk1	3.13392	27.8855	4.00527e-171	5.76644e-169	1.57045	9.66379	4.29681e-22	1.33704e-20	1.86274	11.5892	4.67559e-31	3.92405e-29
Grik5	2.63247	27.816	2.7814e-170	3.85748e-168	1.81809	10.8164	2.87833e-27	1.22948e-25	1.74105	12.8347	1.04814e-37	1.44033e-35
Dlg4	3.11961	27.7376	2.45579e-169	3.31466e-167	2.01726	13.5558	7.32124e-42	9.46791e-40	2.04549	17.0107	6.84226e-65	8.55624e-62
Scrt1	3.28552	27.5595	3.40791e-167	4.55907e-165	1.12078	7.84634	4.28352e-15	7.6046e-14	1.28141	8.06202	7.50413e-16	1.92293e-14
Eml2	2.88999	27.4422	8.61439e-166	1.13238e-163	2.07366	12.6885	6.85002e-37	5.71349e-35	1.68614	11.4778	1.70545e-30	1.33291e-28
Rapgef1	3.27261	27.4377	9.73753e-166	1.26899e-163	1.28321	8.17468	2.96646e-16	5.80767e-15	1.37331	8.41597	3.89643e-17	1.11327e-15
Cdk16	3.4025	27.086	1.44068e-161	1.8149e-159	1.11832	7.11316	1.13419e-12	1.6149e-11	1.39784	12.5433	4.32432e-36	5.30153e-34
Cacnb3	3.17515	27.0705	2.19328e-161	2.74016e-159	1.75743	11.0132	3.30102e-28	1.51075e-26	2.28472	14.3759	7.32664e-47	1.83239e-44
Hdac5	3.62202	27.0237	7.79135e-161	9.65425e-159	2.05573	11.6834	1.54889e-31	8.83931e-30	1.61835	10.4458	1.53218e-25	8.40345e-24
Cplx2	2.75953	26.9545	5.05232e-160	6.20943e-158	1.58505	11.9449	6.90705e-33	4.28906e-31	1.524	17.53	8.45284e-69	1.76171e-65
Eif3f	3.41107	26.8345	1.27938e-158	1.54723e-156	1.16888	7.28372	3.24731e-13	4.8541e-12	1.9646	13.1723	1.2667e-39	1.95557e-37
Iqsec2	3.04396	26.8106	2.42998e-158	2.91539e-156	2.52786	16.53	2.23311e-61	1.21069e-58	1.84661	12.4827	9.28308e-36	1.12704e-33
Sbf1	2.86673	26.7569	1.02636e-157	1.22169e-155	2.368	13.4541	2.91363e-41	3.36278e-39	1.71286	11.3878	4.81243e-30	3.60356e-28
Grk2	2.99206	26.6885	6.39657e-157	7.55445e-155	1.60433	9.66307	4.32692e-22	1.34344e-20	1.59273	12.8264	1.16632e-37	1.5853e-35
Lrrc10b	3.53466	26.6081	5.46675e-156	6.35699e-154	1.52281	8.53562	1.39409e-17	3.09954e-16	1.78793	10.307	6.5509e-25	3.35703e-23
Camta2	2.64843	26.5851	1.00938e-155	1.1648e-153	2.47065	14.6576	1.20455e-48	2.42562e-46	2.51588	13.482	1.99623e-41	3.37335e-39
Pcsk1n	2.84899	26.5072	8.00739e-155	9.17028e-153	0.925021	5.4182	6.02025e-08	5.15248e-07	2.50021	12.7677	2.48466e-37	3.23653e-35
Fbxo31	3.0691	26.1391	1.30974e-150	1.43474e-148	2.45287	14.927	2.19999e-50	5.08378e-48	2.03442	11.6795	1.62165e-31	1.43821e-29
Srf	2.91249	26.0384	1.82231e-149	1.96771e-147	1.98678	11.7994	3.93078e-32	2.2991e-30	2.01698	11.4269	3.0686e-30	2.31161e-28
Fam102a	3.10038	26.0053	4.3109e-149	4.62184e-147	1.60487	10.6198	2.41082e-26	9.70942e-25	1.84559	12.2579	1.52324e-34	1.60069e-32
Atn1	2.51233	25.8566	2.04862e-147	2.16567e-145	1.59689	9.55278	1.26263e-21	3.74695e-20	2.07929	13.0224	9.12886e-39	1.359e-36
Klf13	2.68485	25.7578	2.63618e-146	2.74836e-144	0.764067	3.9281	8.5619e-05	0.000452017	1.96962	12.446	1.46949e-35	1.71738e-33
Hpcal4	3.48787	25.7458	3.5936e-146	3.72085e-144	2.46484	15.3519	3.43725e-53	9.6903e-51	2.78986	16.3677	3.25085e-60	2.39129e-57
Zmat5	3.21651	25.6806	1.92502e-145	1.97963e-143	1.77361	9.87066	5.57936e-23	1.84617e-21	1.97064	12.8924	4.96739e-38	6.97946e-36
Bcl9l	3.22231	25.6136	1.07583e-144	1.09887e-142	2.05737	11.8244	2.91889e-32	1.72877e-30	1.79669	8.58907	8.76742e-18	2.60419e-16
Zfp651	2.90351	25.3552	7.88067e-142	7.94214e-140	1.11339	7.57595	3.56517e-14	5.80307e-13	1.57455	9.56243	1.1502e-21	4.79442e-20
Kcnh3	2.61704	25.3452	1.01539e-141	1.01653e-139	2.63893	15.4917	3.94817e-54	1.20986e-51	2.26121	12.6162	1.72014e-36	2.17277e-34
Mast2	3.12	25.3057	2.7659e-141	2.73281e-139	1.62774	9.62373	6.34872e-22	1.95396e-20	1.42925	7.8169	5.41415e-15	1.30451e-13
Srcin1	2.7123	25.2969	3.4531e-141	3.38964e-139	2.27558	15.2314	2.1893e-52	5.82271e-50	1.27513	8.82377	1.10671e-18	3.60401e-17
Cnih2	2.84693	25.1611	1.06784e-139	1.04146e-137	1.23142	7.54521	4.51564e-14	7.25797e-13	2.46465	18.2444	2.29041e-74	9.54721e-71
Epop	2.90071	24.9868	8.50724e-138	8.13949e-136	2.01387	12.3265	6.52498e-35	4.79042e-33	2.29812	13.0552	5.9351e-39	8.94197e-37
Caskin1	2.55933	24.8903	9.47356e-137	9.00703e-135	1.6173	9.60121	7.90152e-22	2.40043e-20	1.5065	9.98968	1.69127e-23	7.69065e-22
Mvb12b	2.96529	24.88	1.22522e-136	1.1576e-134	0.923854	5.87792	4.15463e-09	4.06975e-08	1.28977	8.74578	2.21489e-18	7.02973e-17
Pou6f1	3.13703	24.7389	4.08236e-135	3.83311e-133	1.23627	7.54163	4.64121e-14	7.45131e-13	1.49239	11.2154	3.42716e-29	2.36777e-27
Samd4b	3.11379	24.7321	4.82701e-135	4.50432e-133	1.34668	7.95415	1.80363e-15	3.29118e-14	1.52657	10.8126	2.99926e-27	1.82955e-25
Adcy1	2.85929	24.703	9.92568e-135	9.2053e-133	1.44868	9.05037	1.42487e-19	3.56748e-18	1.52478	6.38944	1.66497e-10	2.765e-09
Med25	3.04271	24.7	1.06818e-134	9.84611e-133	1.17758	7.11262	1.13859e-12	1.61953e-11	1.139	5.98987	2.10007e-09	3.11522e-08
B4galt2	3.28174	24.5681	2.77157e-133	2.50885e-131	1.14979	6.95736	3.46699e-12	4.66769e-11	1.59596	9.15213	5.58207e-20	2.01164e-18
Rundc3a	2.67008	24.5056	1.2877e-132	1.1587e-130	1.11469	7.07236	1.52322e-12	2.13858e-11	1.51213	12.4105	2.29144e-35	2.55844e-33
Gna11	2.63065	24.4496	5.08793e-132	4.52437e-130	1.80191	11.6221	3.18071e-31	1.77918e-29	1.82381	13.9977	1.61058e-44	3.41361e-42
Arhgef17	2.55391	24.4051	1.5089e-131	1.33392e-129	2.1018	13.3084	2.06817e-40	2.19195e-38	1.52044	12.0932	1.14779e-33	1.15751e-31
Epb41l1	2.8069	24.3389	7.60819e-131	6.64815e-129	1.23474	7.47606	7.65811e-14	1.20076e-12	1.73663	9.55723	1.20951e-21	5.02488e-20
Pip5k1c	2.63385	24.3057	1.70622e-130	1.48235e-128	1.58554	10.2318	1.42858e-24	5.15021e-23	1.71793	11.2283	2.96111e-29	2.08026e-27
Plch2	2.63359	24.2675	4.32407e-130	3.73525e-128	1.96673	12.0635	1.64539e-33	1.07377e-31	1.2636	6.86056	6.85933e-12	1.29376e-10
Arhgef4	2.84178	24.2651	4.58605e-130	3.93905e-128	1.17824	7.23907	4.51768e-13	6.66819e-12	1.86959	11.5685	5.95409e-31	4.93086e-29
Clmn	2.99311	24.2505	6.52686e-130	5.56478e-128	0.91262	6.71671	1.85868e-11	2.31244e-10	1.02914	6.89294	5.46528e-12	1.04023e-10
Pld3	2.66981	24.2472	7.08389e-130	5.98252e-128	3.04922	19.0723	4.29291e-81	8.64469e-78	2.38638	12.4154	2.15488e-35	2.42764e-33
Apba1	2.8931	24.1107	1.93073e-128	1.62149e-126	1.45386	8.72281	2.71371e-18	6.26063e-17	1.29211	6.39886	1.56546e-10	2.61712e-09
Traf3	3.43425	23.9963	3.03843e-127	2.50994e-125	0.573345	3.43489	0.000592804	0.00257192	0.832837	4.23285	2.3075e-05	0.000189963
Shc3	3.91685	23.984	4.08525e-127	3.35634e-125	1.57535	8.2422	1.69075e-16	3.41444e-15	1.23414	4.12762	3.6653e-05	0.000292686
Gnl1	2.55834	23.9204	1.87687e-126	1.53366e-124	1.10509	7.15645	8.27913e-13	1.19818e-11	1.6891	12.1241	7.87521e-34	8.07209e-32
Phactr1	2.64383	23.6791	5.9264e-124	4.81663e-122	2.29073	15.3953	1.76018e-53	5.06357e-51	2.16043	11.7944	4.17153e-32	3.75287e-30
Frmpd3	3.12733	23.6553	1.04054e-123	8.41166e-122	1.81643	10.7063	9.51347e-27	3.90968e-25	1.31815	6.5187	7.09203e-11	1.22157e-09
Dzip1	3.28616	23.6358	1.65163e-123	1.32807e-121	1.17656	7.10254	1.22487e-12	1.73526e-11	1.30084	9.16745	4.84331e-20	1.76063e-18
Ppfia4	2.94081	23.5825	5.82149e-123	4.63176e-121	1.53188	8.92279	4.5468e-19	1.09558e-17	1.81134	9.45237	3.31253e-21	1.31086e-19
Ssbp4	2.56657	23.4991	4.16667e-122	3.28061e-120	1.49426	8.86937	7.35589e-19	1.73974e-17	2.00165	11.5991	4.16345e-31	3.51784e-29
Homer2	3.42553	23.4679	8.68023e-122	6.79891e-120	1.30912	7.68152	1.57208e-14	2.66026e-13	1.41217	6.66842	2.5857e-11	4.59291e-10
Pex6	2.87844	23.4498	1.32929e-121	1.03582e-119	2.68088	15.6738	2.28423e-55	7.48802e-53	1.89989	13.9424	3.50011e-44	7.29482e-42
Sowaha	2.91518	23.3803	6.7796e-121	5.2024e-119	2.36088	14.6013	2.75558e-48	5.32092e-46	2.48403	15.4116	1.36874e-53	4.89033e-51
Zfp771	3.27947	23.2507	1.39913e-119	1.06284e-117	1.77965	8.91653	4.81106e-19	1.15335e-17	2.10545	10.1503	3.30252e-24	1.57027e-22
Ccdc85c	4.47387	23.1737	8.38351e-119	6.33668e-117	1.20996	6.04486	1.49537e-09	1.53077e-08	1.32559	6.07228	1.26104e-09	1.92309e-08
Capn15	3.06738	23.1498	1.45901e-118	1.09731e-116	2.23258	12.1137	8.94133e-34	6.03048e-32	1.70351	9.31212	1.25301e-20	4.74813e-19
Adgrb2	2.06211	23.135	2.06062e-118	1.5421e-116	2.38151	15.7941	3.41876e-56	1.20477e-53	1.96578	16.7416	6.52337e-63	7.41588e-60
Arrb1	3.0463	23.0997	4.66686e-118	3.47531e-116	0.955808	6.15046	7.7257e-10	8.21278e-09	0.669066	4.59355	4.35778e-06	4.12833e-05
Stac2	3.43442	22.989	6.00763e-117	4.43012e-115	0.792496	4.79772	1.60483e-06	1.12939e-05	2.29055	7.65609	1.91677e-14	4.38194e-13
Nfix	2.14829	22.7839	6.61802e-115	4.80984e-113	1.15059	7.67661	1.63352e-14	2.75431e-13	0.809248	8.06633	7.24442e-16	1.86402e-14
Ppp2r2c	2.46249	22.7101	3.55737e-114	2.53664e-112	1.52545	10.3763	3.17864e-25	1.20771e-23	1.95161	11.618	3.33681e-31	2.83856e-29
Dusp8	2.7729	22.6886	5.8117e-114	4.12467e-112	2.09778	13.4361	3.71704e-41	4.19163e-39	2.04847	10.7443	6.30336e-27	3.8079e-25
Rack1	3.22219	22.685	6.30239e-114	4.43131e-112	1.05936	6.12428	9.10971e-10	9.58287e-09	1.24943	10.3722	3.31721e-25	1.78033e-23
Tnrc18	2.5356	22.644	1.59937e-113	1.11418e-111	2.08288	12.2573	1.53549e-34	1.08765e-32	1.10775	4.76258	1.9113e-06	1.90445e-05
Cdk5r2	2.29682	22.6014	4.19656e-113	2.91007e-111	1.93571	12.1947	3.31658e-34	2.28051e-32	2.35857	14.3389	1.25084e-46	2.95127e-44
Fbxo41	2.57833	22.591	5.31096e-113	3.66601e-111	2.26338	13.0101	1.07211e-38	1.02112e-36	1.99106	8.30217	1.02224e-16	2.84069e-15
Dvl1	3.02849	22.4788	6.68909e-112	4.59632e-110	1.8319	10.0421	9.95388e-24	3.45591e-22	1.91723	11.1292	9.0449e-29	6.04847e-27
Aatk	2.31611	22.4293	2.03911e-111	1.38853e-109	2.07454	13.039	7.34518e-39	7.09162e-37	1.32894	9.0289	1.73406e-19	6.05709e-18
Ppp1r16a	3.36393	22.3764	6.67832e-111	4.46709e-109	1.14309	6.47	9.8006e-11	1.13985e-09	1.65863	8.68624	3.74634e-18	1.1596e-16
Gfod1	2.74117	22.3651	8.60078e-111	5.72767e-109	1.99149	12.4269	1.86765e-35	1.42305e-33	1.88524	9.46339	2.98126e-21	1.19489e-19
Speg	2.4678	22.287	4.94162e-110	3.26211e-108	1.78888	11.3516	7.28565e-30	3.65475e-28	1.94909	10.1375	3.76651e-24	1.77737e-22
Znrf1	3.12813	22.1681	6.98569e-109	4.5323e-107	1.27481	7.27295	3.51723e-13	5.24089e-12	1.74735	12.0798	1.34976e-33	1.3503e-31
Prrc2b	2.42271	22.1606	8.25007e-109	5.30708e-107	1.91347	11.8829	1.45224e-32	8.78572e-31	1.88242	9.66048	4.438e-22	1.90059e-20
Ski	2.47137	22.1241	1.85151e-108	1.18599e-106	1.54925	9.87792	5.18987e-23	1.72133e-21	1.54236	9.92416	3.26834e-23	1.45447e-21
Ctdsp2	2.74944	22.1074	2.68498e-108	1.71261e-106	0.659533	4.08853	4.34107e-05	0.000242247	0.988284	6.167	6.95996e-10	1.08252e-08
Agap3	2.45426	22.0791	5.0173e-108	3.1735e-106	1.93004	11.6743	1.72555e-31	9.76839e-30	2.06373	14.5893	3.28343e-48	8.92593e-46
2700081O15Rik	2.70102	22.0758	5.39433e-108	3.39775e-106	2.58453	15.4314	1.00678e-53	2.99417e-51	2.32601	14.8212	1.06865e-49	3.25939e-47
Dennd4b	3.22923	21.9038	2.39169e-106	1.49402e-104	2.0262	10.9121	1.00882e-27	4.51441e-26	1.64995	7.91355	2.5016e-15	6.15797e-14
Zfp365	3.07162	21.8449	8.70068e-106	5.3905e-104	0.983852	6.63839	3.17135e-11	3.8805e-10	1.94562	11.3682	6.02419e-30	4.35448e-28
Src	2.32129	21.7508	6.78353e-105	4.16856e-103	1.13214	7.50048	6.35839e-14	1.00255e-12	1.27862	7.99931	1.25121e-15	3.12929e-14
Pitpnm3	3.32257	21.7028	1.93066e-104	1.17212e-102	1.7787	8.94663	3.66509e-19	8.93825e-18	1.72807	7.34757	2.0185e-13	4.26373e-12
Rap1gap2	2.91533	21.645	6.77234e-104	4.07879e-102	1.63418	9.68949	3.34194e-22	1.04452e-20	1.39532	6.27977	3.3907e-10	5.48521e-09
Syngap1	2.07667	21.6198	1.16938e-103	7.01488e-102	2.13867	13.238	5.29325e-40	5.44625e-38	2.0974	12.6535	1.0706e-36	1.36611e-34
1700003E16Rik	3.46382	21.598	1.8774e-103	1.12176e-101	1.48156	8.06683	7.21484e-16	1.36878e-14	1.75586	9.55427	1.24461e-21	5.1536e-20
St6galnac6	3.14507	21.5368	7.04109e-103	4.17412e-101	0.401277	2.45978	0.0139024	0.0400507	1.34975	8.33939	7.46737e-17	2.10314e-15
Pacs2	3.05016	21.3844	1.86567e-101	1.08893e-99	0.602951	3.94712	7.90974e-05	0.000420739	0.563874	3.20697	0.00134139	0.00720312
Wdr13	2.81434	21.1808	1.43601e-99	8.25405e-98	1.66362	11.0312	2.70381e-28	1.24552e-26	1.70824	10.2526	1.15243e-24	5.7876e-23
Thra	2.40151	21.1706	1.78236e-99	1.0206e-97	1.67435	11.1894	4.59765e-29	2.21189e-27	2.1791	17.7734	1.13575e-70	2.84051e-67
Akt1	2.58524	21.1428	3.21236e-99	1.8325e-97	1.05306	6.72667	1.73589e-11	2.16541e-10	1.2826	10.1497	3.32355e-24	1.57428e-22
Nisch	2.23305	21.0033	6.11512e-98	3.42379e-96	2.20419	13.5335	9.91339e-42	1.22578e-39	1.43989	8.01633	1.08953e-15	2.73585e-14
Bcr	2.26297	20.9928	7.62416e-98	4.25293e-96	2.06137	14.1184	2.92461e-45	4.85004e-43	1.85372	14.5955	3.00032e-48	8.33755e-46
Celf4	2.56319	20.8808	7.99941e-97	4.39735e-95	1.61555	11.0724	1.70792e-28	8.02492e-27	1.90567	15.8113	2.6004e-56	1.16136e-53
Stox2	2.9347	20.8503	1.51552e-96	8.24105e-95	1.74461	11.0573	2.02152e-28	9.40438e-27	1.39853	5.06463	4.09199e-07	4.47684e-06
Castor2	2.94214	20.8382	1.95147e-96	1.05358e-94	1.4351	8.23597	1.78104e-16	3.58652e-15	1.1486	6.97053	3.15756e-12	6.14079e-11
Ppp1r37	2.3826	20.8179	2.9808e-96	1.60359e-94	1.70786	9.97205	2.02022e-23	6.86195e-22	1.59655	12.5507	3.93893e-36	4.87686e-34
Agap1	2.64911	20.7779	6.85322e-96	3.66078e-94	1.68913	11.5246	9.91182e-31	5.33271e-29	1.29438	6.42475	1.32082e-10	2.22599e-09
Arhgef10l	3.4004	20.7607	9.82077e-96	5.19093e-94	1.18278	6.92161	4.46541e-12	5.93256e-11	0.528586	2.53028	0.0113973	0.0431105
Elfn2	2.32655	20.7453	1.35138e-95	7.09333e-94	2.16937	13.6858	1.23378e-42	1.79293e-40	1.62429	10.1886	2.22978e-24	1.08496e-22
Rtn2	3.08247	20.7328	1.7515e-95	9.16175e-94	0.973461	5.48992	4.02126e-08	3.51854e-07	1.26027	8.48406	2.17478e-17	6.29529e-16
Bsn	2.17679	20.7242	2.09381e-95	1.09145e-93	2.43518	14.2922	2.44884e-46	4.20962e-44	1.93972	7.75588	8.77303e-15	2.08965e-13
Mknk2	2.9187	20.6603	7.89362e-95	4.08657e-93	1.35319	8.64346	5.4534e-18	1.23587e-16	1.44486	7.04278	1.88439e-12	3.72852e-11
Lasp1	2.71545	20.6353	1.32324e-94	6.82711e-93	0.917926	5.44979	5.04282e-08	4.36095e-07	1.45087	10.3089	6.42233e-25	3.30499e-23
Sptbn2	1.91387	20.6058	2.43247e-94	1.25074e-92	1.61517	9.43021	4.09254e-21	1.17253e-19	1.79446	11.4395	2.65435e-30	2.02394e-28
Atp13a2	2.17672	20.582	3.97843e-94	2.03871e-92	2.05663	11.4838	1.59047e-30	8.27281e-29	1.45399	8.35013	6.81887e-17	1.92483e-15
Gas2l1	2.86888	20.5168	1.52338e-93	7.78007e-92	1.23222	7.1356	9.63632e-13	1.38183e-11	1.4193	6.96897	3.19259e-12	6.19927e-11
Arc	2.3677	20.4292	9.20223e-93	4.66208e-91	2.83766	18.2304	2.95908e-74	3.20855e-71	2.40236	11.586	4.85064e-31	4.04382e-29
Mpnd	2.78116	20.4291	9.22116e-93	4.66208e-91	1.33392	7.36045	1.83295e-13	2.80535e-12	1.70858	9.66842	4.10671e-22	1.76475e-20
Btbd2	2.35778	20.4068	1.45487e-92	7.30675e-91	1.77861	11.9933	3.85362e-33	2.42503e-31	1.60292	8.20307	2.3433e-16	6.27472e-15
Ptpa	2.5516	20.2525	3.37377e-91	1.68878e-89	1.56193	9.12146	7.41194e-20	1.88931e-18	1.68808	10.9488	6.73656e-28	4.32004e-26
Synpo	2.13112	20.2452	3.91682e-91	1.94772e-89	2.1414	13.0235	8.99645e-39	8.6268e-37	2.71301	17.8512	2.82836e-71	8.84216e-68
Trim8	2.22604	20.2384	4.49657e-91	2.22868e-89	1.06836	7.28683	3.17336e-13	4.74859e-12	1.06232	8.65856	4.77761e-18	1.46431e-16
Huwe1	2.18623	20.2344	4.87213e-91	2.40693e-89	1.61532	12.1646	4.79963e-34	3.26838e-32	1.32752	7.07847	1.45752e-12	2.90691e-11
Plekhm2	2.52937	20.1827	1.3895e-90	6.84203e-89	0.567693	3.17959	0.00147484	0.00578284	1.13865	5.66044	1.50986e-08	1.99681e-07
6430548M08Rik	2.67044	20.094	8.33428e-90	4.06417e-88	2.09923	12.4793	9.68858e-36	7.50386e-34	1.54258	11.0515	2.15565e-28	1.41876e-26
Med13l	2.49517	20.0919	8.68374e-90	4.22097e-88	1.77956	11.6042	3.92523e-31	2.18696e-29	1.48878	7.67552	1.64749e-14	3.80109e-13
AI506816	2.96381	20.055	1.82556e-89	8.84519e-88	0.941896	5.97982	2.23387e-09	2.25402e-08	0.927864	5.93674	2.90742e-09	4.23745e-08
Nova2	2.09184	20.0316	2.92154e-89	1.41102e-87	2.56418	16.6365	3.78878e-62	2.22528e-59	2.29581	10.9238	8.86963e-28	5.60175e-26
Prkcz	2.25738	20.0254	3.30619e-89	1.59171e-87	1.64625	10.4785	1.08504e-25	4.26037e-24	1.76777	12.4362	1.66267e-35	1.92516e-33
Elavl3	2.15469	20.0027	5.21358e-89	2.4941e-87	2.22043	14.7538	2.90665e-49	6.2079e-47	2.14615	17.1325	8.49682e-66	1.18059e-62
Rnf165	2.21216	19.9864	7.22846e-89	3.44709e-87	2.03501	13.5175	1.23225e-41	1.4846e-39	1.69781	8.41884	3.80221e-17	1.09052e-15
Trak1	2.53415	19.9657	1.09444e-88	5.20274e-87	1.14931	6.51376	7.3294e-11	8.64562e-10	1.32818	9.85666	6.41473e-23	2.84455e-21
Klhl34	2.99057	19.9484	1.54757e-88	7.33373e-87	2.16428	10.8401	2.22331e-27	9.58405e-26	1.79082	5.77379	7.75092e-09	1.07337e-07
Ppfia3	2.14276	19.8241	1.84384e-87	8.5501e-86	1.69437	10.3138	6.10432e-25	2.25253e-23	1.58759	12.4534	1.34092e-35	1.5819e-33
Mta3	2.78307	19.8151	2.20385e-87	1.01882e-85	2.01446	10.7604	5.29246e-27	2.22031e-25	1.09956	4.90936	9.13764e-07	9.44349e-06
Trnp1	2.80767	19.7831	4.16118e-87	1.91782e-85	1.02294	6.07553	1.23583e-09	1.2809e-08	1.84523	12.9593	2.08221e-38	2.99288e-36
Ankrd13b	2.42024	19.7429	9.22679e-87	4.23956e-85	1.75602	10.4334	1.74492e-25	6.75724e-24	1.44517	6.73396	1.65109e-11	2.99664e-10
Ubqln4	2.43482	19.7323	1.13827e-86	5.2143e-85	1.30505	7.87558	3.39174e-15	6.04424e-14	1.98754	12.4266	1.87402e-35	2.14996e-33
Nyap1	2.32129	19.6272	9.05005e-86	4.1084e-84	1.77629	10.8756	1.50737e-27	6.63998e-26	1.51175	10.6588	1.58711e-26	9.209e-25
Nacc1	2.31545	19.6244	9.56686e-86	4.33e-84	1.60927	9.82348	8.92072e-23	2.9108e-21	1.17998	6.75687	1.41005e-11	2.58166e-10
Marf1	2.73912	19.6099	1.27384e-85	5.74827e-84	0.657496	3.87579	0.000106279	0.000548959	0.33201	2.06275	0.0391366	0.113788
Atxn7l3	2.50301	19.5923	1.79773e-85	8.0882e-84	0.626846	4.01175	6.02694e-05	0.000327383	1.56449	10.847	2.05969e-27	1.27507e-25
Wiz	2.88549	19.5501	4.11333e-85	1.83968e-83	1.22808	7.50679	6.05963e-14	9.60816e-13	1.47862	6.65037	2.92355e-11	5.17833e-10
2020-09-05	1.87276	19.4657	2.14619e-84	9.54236e-83	1.5699	11.4767	1.72773e-30	8.95372e-29	1.73795	12.3581	4.40373e-35	4.78858e-33
Zfp423	3.48516	19.3428	2.34343e-83	1.02091e-81	1.17509	5.94151	2.82413e-09	2.81734e-08	1.12263	5.08334	3.70864e-07	4.08964e-06
St3gal2	2.50759	19.2705	9.49916e-83	4.09114e-81	0.574713	3.299	0.000970299	0.00397938	1.2526	8.25358	1.53724e-16	4.19721e-15
Fgf13	2.56517	19.2678	1.00015e-82	4.29526e-81	1.44444	9.20266	3.49186e-20	9.20023e-19	2.39267	11.4835	1.59599e-30	1.26316e-28
Acap3	2.09055	19.1141	1.92603e-81	8.17857e-80	2.13354	12.2547	1.5848e-34	1.11697e-32	2.15547	11.3768	5.45511e-30	3.97301e-28
Zbtb4	2.51263	19.0961	2.71962e-81	1.1484e-79	1.22552	7.18803	6.5731e-13	9.56185e-12	1.27054	7.29494	2.98798e-13	6.21708e-12
Ap1b1	2.3726	19.0223	1.11534e-80	4.68349e-79	1.73195	9.93703	2.87268e-23	9.71062e-22	1.53575	8.75709	2.00353e-18	6.40771e-17
Pik3r2	2.18381	18.9886	2.11933e-80	8.85024e-79	2.02658	11.7759	5.19441e-32	3.02564e-30	2.40735	12.3827	3.24083e-35	3.58643e-33
2610507B11Rik	2.1424	18.9629	3.45542e-80	1.439e-78	1.39846	9.15229	5.5738e-20	1.43898e-18	0.963178	7.16799	7.61082e-13	1.54502e-11
Bag6	1.9373	18.8526	2.79915e-79	1.14674e-77	2.03347	12.0814	1.32498e-33	8.68691e-32	1.71036	9.08822	1.00674e-19	3.55628e-18
Rnf157	2.29211	18.8483	3.03712e-79	1.24087e-77	1.73364	11.2604	2.05867e-29	1.00412e-27	1.79298	10.2568	1.10333e-24	5.56337e-23
Cul9	2.33668	18.8327	4.07514e-79	1.66048e-77	2.25294	11.523	1.0107e-30	5.41706e-29	1.08053	5.22397	1.7513e-07	2.02965e-06
Dennd5a	2.47822	18.8121	6.01153e-79	2.44291e-77	0.887068	5.60928	2.03166e-08	1.83344e-07	1.00828	6.23479	4.52385e-10	7.22486e-09
Aco2	2.04827	18.7832	1.03651e-78	4.20076e-77	1.20193	7.98172	1.44314e-15	2.65568e-14	0.693166	4.37793	1.19811e-05	0.000103541
Taok2	2.04371	18.7172	3.5824e-78	1.448e-76	1.42283	8.88259	6.53226e-19	1.55276e-17	1.00017	6.7581	1.3981e-11	2.56352e-10
Dmwd	2.00597	18.6537	1.17882e-77	4.73943e-76	1.57096	10.3669	3.50656e-25	1.32516e-23	1.48104	10.1057	5.21125e-24	2.43159e-22
Pdzd4	2.63475	18.653	1.19294e-77	4.78349e-76	1.57557	9.21538	3.10184e-20	8.21872e-19	1.5912	8.25098	1.57102e-16	4.28009e-15
Rabl6	2.31903	18.5374	1.03133e-76	4.08133e-75	1.79874	11.5904	4.60999e-31	2.54833e-29	1.37762	9.17235	4.62808e-20	1.68729e-18
Ube2i	2.38992	18.52	1.42404e-76	5.6207e-75	1.65114	10.7299	7.36997e-27	3.0555e-25	1.96543	14.5502	5.82408e-48	1.51729e-45
Nr2f6	2.98875	18.5179	1.48099e-76	5.83023e-75	1.43578	6.92663	4.30988e-12	5.73674e-11	1.59488	7.93228	2.15155e-15	5.33832e-14
Rnf44	2.09682	18.3924	1.51173e-75	5.90511e-74	1.41004	9.50132	2.0725e-21	6.09895e-20	1.68749	11.6687	1.84173e-31	1.61055e-29
Rps6ka4	2.72969	18.3801	1.89461e-75	7.38166e-74	1.48432	8.21191	2.17691e-16	4.32406e-15	0.963494	4.97333	6.58135e-07	6.94513e-06
Vps9d1	2.68375	18.38	1.90034e-75	7.38497e-74	1.29198	6.955	3.52556e-12	4.74201e-11	1.93042	8.98292	2.63673e-19	9.1336e-18
Ctse	2.85251	18.3725	2.18089e-75	8.45347e-74	0.85316	5.24993	1.5216e-07	1.23582e-06	0.882967	5.78819	7.1149e-09	9.88575e-08
Phf2	2.47533	18.2658	1.54815e-74	5.90993e-73	1.08944	6.43244	1.25571e-10	1.44494e-09	1.01645	6.12769	8.9166e-10	1.37827e-08
Arhgap23	2.43591	18.2478	2.15586e-74	8.18849e-73	1.18491	7.21152	5.53308e-13	8.10751e-12	1.69861	9.11145	8.12863e-20	2.90424e-18
Adap1	2.11685	18.2007	5.09751e-74	1.92167e-72	1.16305	6.5471	5.86656e-11	6.99029e-10	1.68858	11.2817	1.61649e-29	1.14204e-27
Ntng2	3.09557	18.1957	5.58152e-74	2.0989e-72	1.86873	9.64931	4.94878e-22	1.52978e-20	1.55958	6.85508	7.12739e-12	1.34027e-10
Chd5	1.88989	18.1735	8.37251e-74	3.14062e-72	2.17158	13.2474	4.67408e-40	4.88043e-38	1.26214	9.94203	2.732e-23	1.22013e-21
Cacna1h	2.10106	18.1575	1.12112e-73	4.19503e-72	2.34735	13.4536	2.93432e-41	3.36278e-39	1.93934	9.44797	3.45473e-21	1.36282e-19
Mgat4b	2.5634	18.1294	1.8681e-73	6.97286e-72	1.2296	7.26288	3.78934e-13	5.63444e-12	1.69492	9.59963	8.02314e-22	3.38951e-20
Arnt2	2.23437	18.1022	3.06118e-73	1.13421e-71	1.57677	10.7317	7.22561e-27	3.00449e-25	1.43699	6.97162	3.13303e-12	6.10257e-11
Dlg2	2.45303	18.0898	3.83676e-73	1.4112e-71	1.86666	12.2873	1.05994e-34	7.62293e-33	2.11232	10.158	3.05215e-24	1.45676e-22
Zfp335	2.85858	18.0847	4.20456e-73	1.54273e-71	1.77212	9.48955	2.32031e-21	6.7857e-20	1.72408	6.39624	1.59245e-10	2.65514e-09
Mprip	2.02103	18.0046	1.79389e-72	6.4876e-71	0.980914	5.78009	7.46586e-09	7.08201e-08	1.29288	7.52567	5.24502e-14	1.15882e-12
Wsb2	2.34443	17.9835	2.62321e-72	9.44169e-71	0.432629	2.62964	0.00854747	0.0266383	1.52808	11.205	3.854e-29	2.64803e-27
Doc2b	2.0015	17.9558	4.32053e-72	1.55139e-70	2.30792	13.7122	8.57999e-43	1.25983e-40	2.93408	15.5628	1.3023e-54	4.93494e-52
Ankrd11	1.85961	17.8331	3.90969e-71	1.39723e-69	1.76475	12.8807	5.78218e-38	5.25843e-36	1.12755	8.37863	5.35465e-17	1.51493e-15
Tef	2.29925	17.7812	9.88304e-71	3.51534e-69	1.4986	9.89919	4.19672e-23	1.40182e-21	1.7432	9.21513	3.10891e-20	1.1502e-18
Gp1bb	4.25907	17.7193	2.97682e-70	1.05388e-68	1.17629	5.59139	2.2526e-08	2.02633e-07	0.897017	3.76355	0.000167516	0.00116183
Endov	2.9925	17.6632	8.0546e-70	2.82509e-68	1.39463	7.87204	3.48892e-15	6.20957e-14	1.43626	7.7757	7.50308e-15	1.794e-13
Dda1	2.36788	17.6438	1.13466e-69	3.96137e-68	0.993501	5.30728	1.11272e-07	9.21554e-07	1.75054	9.35977	7.99119e-21	3.05596e-19
Fbf1	2.47709	17.6186	1.77311e-69	6.17607e-68	1.17254	6.60851	3.8822e-11	4.71348e-10	1.4011	6.89858	5.2524e-12	1.00277e-10
Pdxk	2.28535	17.5309	8.32195e-69	2.88539e-67	1.49282	8.76031	1.94722e-18	4.52191e-17	0.669957	4.38007	1.18641e-05	0.000102743
Egln1	2.55332	17.4386	4.20111e-68	1.44666e-66	0.547641	3.12761	0.00176235	0.00676342	1.45168	9.12239	7.34869e-20	2.6331e-18
Ppp1r12b	3.01052	17.4259	5.25153e-68	1.80426e-66	1.72987	4.13515	3.54723e-05	0.000201377	1.89796	6.9649	3.28641e-12	6.37155e-11
Hectd4	1.80881	17.3815	1.13855e-67	3.89399e-66	2.37456	15.121	1.17705e-51	2.96279e-49	1.02836	5.65758	1.53525e-08	2.02728e-07
Dlgap4	1.79309	17.38	1.16989e-67	3.99215e-66	1.60471	10.7276	7.55546e-27	3.12322e-25	1.54812	9.73613	2.11463e-22	9.21376e-21
Psd3	2.15032	17.359	1.68756e-67	5.74567e-66	2.06353	14.6662	1.06151e-48	2.16856e-46	2.2251	9.2837	1.63698e-20	6.16579e-19
Hdac4	2.44998	17.3418	2.27596e-67	7.71427e-66	2.11335	12.8316	1.09112e-37	9.85922e-36	1.38588	6.09586	1.08848e-09	1.67012e-08
Pabpc4	2.85222	17.3344	2.58733e-67	8.75002e-66	1.44468	8.39197	4.78074e-17	1.01034e-15	1.98359	10.5988	3.01978e-26	1.72431e-24
Tnpo2	2.17234	17.3291	2.83718e-67	9.57357e-66	1.79169	11.8746	1.60376e-32	9.66096e-31	1.44043	11.6389	2.61294e-31	2.26909e-29
Rbck1	2.40282	17.329	2.84464e-67	9.57739e-66	1.2988	7.50353	6.2124e-14	9.82828e-13	1.79411	9.29152	1.52095e-20	5.74605e-19
Zfp358	2.80637	17.2897	5.62012e-67	1.87963e-65	1.34584	6.80442	1.01456e-11	1.29658e-10	1.61308	6.85741	7.0122e-12	1.3206e-10
Tmem8b	2.11581	17.2706	7.83725e-67	2.6096e-65	1.90593	12.8214	1.2446e-37	1.11037e-35	1.7467	9.17901	4.35063e-20	1.59078e-18
Gpi1	1.70319	17.269	8.04645e-67	2.67337e-65	1.58946	10.3239	5.49688e-25	2.04443e-23	1.04123	8.17758	2.89593e-16	7.70502e-15
Rell2	2.55358	17.2588	9.60543e-67	3.18433e-65	0.715917	3.91284	9.12152e-05	0.000477981	1.77381	9.45273	3.30091e-21	1.31041e-19
Zmiz1	2.0012	17.2362	1.42049e-66	4.69881e-65	1.50728	10.209	1.8068e-24	6.46413e-23	1.26947	8.65632	4.87246e-18	1.48973e-16
Tom1l2	2.11133	17.2342	1.46981e-66	4.85133e-65	1.36901	8.28435	1.1876e-16	2.43675e-15	1.67048	9.8345	7.99655e-23	3.53346e-21
Camk2n1	2.32518	17.2275	1.64994e-66	5.4222e-65	0.395408	2.52423	0.0115951	0.0343514	1.41336	12.0281	2.5282e-33	2.45079e-31
Zbtb7a	1.80168	17.1728	4.24234e-66	1.38813e-64	2.21166	14.3924	5.77657e-47	1.03072e-44	1.38918	10.926	8.65665e-28	5.49499e-26
Gga1	2.20433	17.1486	6.44282e-66	2.09906e-64	1.39331	7.55308	4.25074e-14	6.86351e-13	1.86001	10.1369	3.78816e-24	1.78086e-22
Arid1a	1.87407	17.1152	1.14227e-65	3.68966e-64	1.53102	10.4945	9.15955e-26	3.60651e-24	1.3957	9.50184	2.06215e-21	8.34535e-20
Adra2c	2.32984	17.1065	1.32841e-65	4.27268e-64	2.10484	12.0582	1.75682e-33	1.13597e-31	1.77103	9.38434	6.33121e-21	2.44357e-19
Pou3f3	1.96975	17.081	2.05734e-65	6.56135e-64	1.3496	8.45874	2.70278e-17	5.87033e-16	1.30194	8.7063	3.13946e-18	9.7659e-17
Msl1	2.3895	16.9787	1.18123e-64	3.70471e-63	0.96402	6.05451	1.40841e-09	1.44701e-08	1.34542	11.2247	3.08488e-29	2.15511e-27
Hivep2	1.92271	16.8681	7.71866e-64	2.39596e-62	2.93627	18.901	1.11841e-79	1.57651e-76	1.77374	7.54345	4.57715e-14	1.01548e-12
Dok6	3.77746	16.8607	8.751e-64	2.70529e-62	1.85028	7.60734	2.79798e-14	4.60214e-13	1.67106	3.75877	0.000170751	0.001181
Rin1	2.00851	16.7922	2.78499e-63	8.53971e-62	2.37284	13.6712	1.5092e-42	2.14886e-40	2.15446	12.7745	2.2772e-37	3.0294e-35
Fbxl19	2.22543	16.7846	3.16268e-63	9.65862e-62	1.63143	8.85503	8.36613e-19	1.97206e-17	1.56153	8.92204	4.57776e-19	1.53472e-17
Sympk	2.02826	16.7474	5.91296e-63	1.80214e-61	1.6184	9.41031	4.94676e-21	1.39459e-19	2.15272	10.281	8.58736e-25	4.34757e-23
Pink1	1.97662	16.6969	1.37997e-62	4.16386e-61	1.03423	7.11759	1.09833e-12	1.56859e-11	0.281697	2.48977	0.0127827	0.0473483
Mxd4	2.83961	16.6838	1.72021e-62	5.16985e-61	0.466905	2.77123	0.00558449	0.0185027	1.18289	5.70647	1.15341e-08	1.55592e-07
Eef1a2	1.76023	16.6713	2.11894e-62	6.33044e-61	2.0974	12.8096	1.44829e-37	1.27594e-35	2.19331	16.0048	1.18366e-57	6.72801e-55
Rexo1	2.13833	16.6502	3.01496e-62	8.97187e-61	1.84917	11.4899	1.48305e-30	7.74264e-29	1.84168	10.3141	6.08555e-25	3.14462e-23
Spen	2.1681	16.6279	4.37874e-62	1.30046e-60	1.3093	8.41475	3.93748e-17	8.37146e-16	1.28708	4.54109	5.59636e-06	5.14955e-05
Zfhx2	2.10302	16.6224	4.80033e-62	1.42287e-60	1.53377	9.1899	3.93213e-20	1.02643e-18	1.834	7.54336	4.58e-14	1.01548e-12
Fasn	1.77236	16.6095	5.951e-62	1.76049e-60	1.69597	10.4423	1.58942e-25	6.18907e-24	0.466902	1.9433	0.0519801	0.140692
Socs7	2.09464	16.5693	1.16131e-61	3.40885e-60	1.629	10.8717	1.57325e-27	6.90857e-26	1.48666	8.31258	9.36411e-17	2.6138e-15
Wwc1	2.11231	16.5624	1.30283e-61	3.80945e-60	1.02274	5.82896	5.57745e-09	5.38492e-08	1.2941	6.71533	1.87639e-11	3.3957e-10
Mmp24	2.48467	16.4934	4.09519e-61	1.19281e-59	1.60202	8.13106	4.25544e-16	8.20584e-15	1.94471	10.1126	4.85809e-24	2.2753e-22
Rasd2	2.16501	16.3641	3.45362e-60	9.96344e-59	2.02313	11.5539	7.05196e-31	3.86787e-29	2.30789	13.5548	7.42303e-42	1.30739e-39
Lztr1	2.03573	16.3637	3.4754e-60	1.00072e-58	2.4992	14.9771	1.03702e-50	2.4776e-48	1.55069	10.8198	2.77246e-27	1.69949e-25
Tacc1	2.08239	16.3632	3.4999e-60	1.00586e-58	1.43687	8.19291	2.54995e-16	5.04125e-15	1.25381	4.0092	6.09241e-05	0.000467117
Atg2a	2.29013	16.2744	1.49946e-59	4.27686e-58	2.04396	11.0789	1.58881e-28	7.49027e-27	1.16475	5.37025	7.86282e-08	9.52758e-07
Zfp704	2.34056	16.2447	2.43679e-59	6.93729e-58	1.57921	9.56505	1.12147e-21	3.35205e-20	1.31388	5.44663	5.13321e-08	6.37446e-07
Fam53c	2.3555	16.2156	3.9149e-59	1.10827e-57	1.27805	7.80051	6.16566e-15	1.08233e-13	1.21549	6.50247	7.9013e-11	1.35165e-09
Cdc42bpb	1.92233	16.2017	4.90464e-59	1.38327e-57	2.14427	13.9351	3.87391e-44	5.87169e-42	1.25689	9.36422	7.66149e-21	2.93886e-19
Sobp	1.8363	16.1429	1.27432e-58	3.57401e-57	2.00448	12.8202	1.26451e-37	1.12104e-35	1.96149	10.4471	1.51033e-25	8.32014e-24
Zcchc14	1.93324	16.0939	2.81383e-58	7.83365e-57	2.01432	13.5521	7.69531e-42	9.77235e-40	1.72199	8.67163	4.25981e-18	1.31528e-16
Nop53	2.1692	16.0819	3.41681e-58	9.49485e-57	0.740384	4.30376	1.67921e-05	0.000101111	1.81737	8.71212	2.98235e-18	9.32357e-17
Bap1	2.07068	16.0501	5.70484e-58	1.57086e-56	1.64139	9.84474	7.22243e-23	2.37313e-21	1.33543	7.90267	2.72982e-15	6.70657e-14
Rims4	3.42994	15.9948	1.38962e-57	3.81944e-56	1.98398	7.88625	3.11415e-15	5.57777e-14	1.99076	5.65019	1.60266e-08	2.10076e-07
Hipk4	1.93723	15.9851	1.6229e-57	4.45251e-56	2.90257	16.8417	1.20716e-63	7.73459e-61	2.21921	10.1961	2.06461e-24	1.01247e-22
Itpr1	2.0752	15.9777	1.82753e-57	5.00486e-56	2.28735	14.8546	6.4907e-50	1.47569e-47	1.78639	6.98806	2.78715e-12	5.4629e-11
Map1s	2.03773	15.956	2.58897e-57	7.07729e-56	2.13755	11.976	4.74931e-33	2.96977e-31	1.54795	9.81394	9.80618e-23	4.30268e-21
Med16	2.22643	15.9482	2.93193e-57	8.00035e-56	1.57507	8.12565	4.44963e-16	8.54523e-15	1.15581	5.72624	1.02678e-08	1.4002e-07
Trim46	2.05525	15.9443	3.11955e-57	8.49699e-56	1.64036	9.56363	1.137e-21	3.38839e-20	1.69364	9.44216	3.65156e-21	1.43594e-19
Ppp6r1	1.94126	15.9198	4.6152e-57	1.25257e-55	1.05127	6.1679	6.92034e-10	7.41254e-09	0.909568	6.31778	2.65351e-10	4.34321e-09
Pacsin1	1.63212	15.8776	9.05295e-57	2.44381e-55	2.02552	12.7685	2.45932e-37	2.13991e-35	2.28112	14.6918	7.27504e-49	2.11568e-46
Smarcc2	1.7837	15.8739	9.61447e-57	2.59077e-55	0.497497	3.17323	0.00150753	0.00589626	1.07446	8.64311	5.47025e-18	1.66033e-16
Bahcc1	2.80054	15.8616	1.169e-56	3.14445e-55	1.96297	8.76118	1.93223e-18	4.49451e-17	1.00714	3.92407	8.70642e-05	0.000646519
Ulk1	2.12223	15.8269	2.02913e-56	5.41951e-55	2.0033	11.2627	2.00544e-29	9.81554e-28	1.3347	6.48054	9.13936e-11	1.55282e-09
Dtx1	1.94759	15.8266	2.03902e-56	5.43631e-55	1.27884	7.98362	1.42098e-15	2.61832e-14	1.26013	6.21164	5.24329e-10	8.3313e-09
Btbd3	2.31612	15.7439	7.56018e-56	1.99107e-54	1.80272	10.6061	2.79281e-26	1.11839e-24	1.78012	6.40118	1.5418e-10	2.58103e-09
Ube2v1	1.78196	15.7331	8.96565e-56	2.35302e-54	0.882661	5.86304	4.5447e-09	4.44259e-08	1.63643	11.621	3.22428e-31	2.76162e-29
Cbfa2t3	2.04612	15.6831	1.97502e-55	5.16546e-54	1.43818	8.30969	9.59505e-17	1.98026e-15	1.83042	8.88961	6.13262e-19	2.02879e-17
Mpped1	1.87726	15.6626	2.72619e-55	7.11775e-54	1.73175	11.2069	3.7727e-29	1.82749e-27	1.94337	14.6694	1.0118e-48	2.87559e-46
Cep85	3.01863	15.6453	3.57818e-55	9.32611e-54	0.846595	4.52089	6.15789e-06	3.98355e-05	0.911403	4.24468	2.18905e-05	0.000180687
B3gat1	1.68113	15.6192	5.39149e-55	1.398e-53	1.43943	8.43572	3.29173e-17	7.08401e-16	1.86419	11.5226	1.0145e-30	8.18471e-29
Ppard	3.18142	15.6084	6.38103e-55	1.65175e-53	0.671746	3.22034	0.00128037	0.00509473	1.28666	4.865	1.1446e-06	1.16842e-05
Calm1	1.96225	15.5972	7.60513e-55	1.96524e-53	2.05357	14.0611	6.58707e-45	1.05513e-42	2.46543	16.6636	2.41167e-62	2.15414e-59
Mink1	1.57518	15.5105	2.94468e-54	7.5321e-53	2.06466	13.4817	2.00368e-41	2.37343e-39	1.26185	9.41949	4.53285e-21	1.76035e-19
Podxl2	1.71049	15.4903	4.03283e-54	1.02807e-52	1.45075	8.32065	8.74816e-17	1.82011e-15	1.96267	13.7079	9.10967e-43	1.70025e-40
Pum2	1.87224	15.4752	5.10034e-54	1.29801e-52	0.959822	6.78713	1.14383e-11	1.45256e-10	1.71552	8.31455	9.21018e-17	2.57659e-15
Rab11fip3	1.67894	15.4741	5.19211e-54	1.31914e-52	2.41884	16.1085	2.22328e-58	8.95409e-56	1.68812	8.49663	1.9517e-17	5.66266e-16
Gsk3a	1.69375	15.4255	1.10371e-53	2.77156e-52	1.32303	8.49154	2.0391e-17	4.46321e-16	2.00313	12.379	3.39646e-35	3.72568e-33
Hipk1	1.9851	15.4068	1.47227e-53	3.68482e-52	1.27807	8.72208	2.73127e-18	6.29085e-17	0.705388	2.99578	0.00273747	0.0131916
Map1a	1.67918	15.33	4.81618e-53	1.19747e-51	2.62795	18.5265	1.26286e-76	1.48344e-73	0.988195	4.13529	3.54513e-05	0.000283452
Brd2	2.00136	15.3281	4.96412e-53	1.23021e-51	0.57322	3.62633	0.000287476	0.00134806	1.09435	5.6512	1.59334e-08	2.09513e-07
Chmp1a	1.8997	15.2918	8.67138e-53	2.13842e-51	1.3531	8.32057	8.75449e-17	1.82011e-15	1.84785	9.09698	9.28758e-20	3.30887e-18
Bicra	2.37997	15.2903	8.8727e-53	2.1845e-51	1.64115	9.22064	2.95332e-20	7.85473e-19	1.83202	7.00809	2.41591e-12	4.75015e-11
Matk	1.77954	15.2103	3.02107e-52	7.29544e-51	1.61043	9.0146	1.97593e-19	4.89502e-18	2.08498	10.3503	4.17251e-25	2.19696e-23
Gnas	1.68214	15.2014	3.46356e-52	8.33736e-51	1.05279	7.69741	1.38847e-14	2.36672e-13	1.08476	11.0383	2.49781e-28	1.63535e-26
Sh2b3	3.30312	15.1911	4.04855e-52	9.73004e-51	0.834667	4.05098	5.10027e-05	0.000281163	1.43622	5.19002	2.10275e-07	2.41016e-06
Tulp4	2.21294	15.1424	8.50908e-52	2.03531e-50	0.710483	5.0586	4.22341e-07	3.21453e-06	0.345565	1.30695	0.191229	0.3567
Plxnd1	2.10443	15.1417	8.60111e-52	2.05407e-50	1.92956	10.3933	2.65961e-25	1.01324e-23	1.25537	6.3455	2.21703e-10	3.63832e-09
Setd7	1.91839	15.0939	1.77593e-51	4.22118e-50	1.02069	6.22142	4.92671e-10	5.34618e-09	0.695104	3.92051	8.83631e-05	0.000654998
Mcrs1	1.95358	15.0581	3.05535e-51	7.20557e-50	1.83791	10.1093	5.02671e-24	1.77141e-22	1.73597	10.3701	3.39143e-25	1.81238e-23
Ppp1r12c	1.94162	15.021	5.34755e-51	1.25721e-49	1.13314	6.47997	9.17419e-11	1.07052e-09	1.61085	9.54316	1.38552e-21	5.68062e-20
Golga7b	1.89499	15.0159	5.77486e-51	1.35347e-49	0.876073	4.84199	1.28545e-06	9.13753e-06	1.85978	10.6725	1.36845e-26	8.07193e-25
Mast3	1.58035	14.9843	9.30621e-51	2.17102e-49	2.60073	16.4329	1.11141e-60	5.59518e-58	2.10774	11.3843	5.00884e-30	3.72537e-28
Fbrsl1	2.15194	14.9491	1.57923e-50	3.66153e-49	0.976147	5.66467	1.47307e-08	1.35097e-07	0.733675	4.60895	4.04703e-06	3.85439e-05
Zfr2	2.33986	14.9239	2.303e-50	5.33146e-49	1.40906	7.66007	1.85826e-14	3.11833e-13	2.12334	9.54261	1.39282e-21	5.6919e-20
Arhgap35	1.62602	14.8822	4.3008e-50	9.86574e-49	1.52483	9.1414	6.16462e-20	1.5857e-18	1.08207	7.48721	7.03524e-14	1.54073e-12
Grk3	2.4805	14.8475	7.21781e-50	1.6507e-48	0.615187	4.17017	3.04372e-05	0.000175334	0.605978	3.53837	0.000402608	0.00253811
Ncdn	1.42113	14.8443	7.56906e-50	1.72581e-48	2.88186	19.8171	2.12081e-87	5.97897e-84	2.66308	17.1428	7.1089e-66	1.11121e-62
Syt7	1.68956	14.7946	1.58722e-49	3.58654e-48	1.84836	12.5561	3.67918e-36	2.94669e-34	1.99167	10.2441	1.25757e-24	6.24043e-23
Ctbp1	1.60666	14.7525	2.96384e-49	6.63767e-48	1.25749	7.95595	1.77759e-15	3.24993e-14	1.06052	8.76531	1.86263e-18	5.97237e-17
Hrk	2.2311	14.7164	5.05991e-49	1.12652e-47	0.962553	5.54266	2.97912e-08	2.64945e-07	1.31637	6.62906	3.37839e-11	5.95864e-10
Plcd3	3.46942	14.6816	8.45286e-49	1.87089e-47	2.1671	9.2157	3.09244e-20	8.20923e-19	2.0134	5.57395	2.4903e-08	3.21707e-07
Cit	2.96355	14.6717	9.78661e-49	2.15977e-47	0.571724	2.74341	0.00608056	0.0199237	0.666885	2.35051	0.0187475	0.0636713
C1qtnf4	1.45139	14.6654	1.07313e-48	2.3648e-47	2.87579	14.7191	4.86058e-49	1.00757e-46	1.97051	11.1393	8.07844e-29	5.46059e-27
Ptpn1	2.11836	14.661	1.14578e-48	2.51389e-47	1.13215	6.43332	1.24845e-10	1.43775e-09	1.32643	6.73878	1.59724e-11	2.90734e-10
Ralgds	1.82498	14.6202	2.08691e-48	4.55235e-47	1.12262	6.70516	2.01186e-11	2.49421e-10	1.04832	5.20928	1.8957e-07	2.18486e-06
Rhot2	1.97105	14.4739	1.77174e-47	3.79368e-46	0.794374	4.76668	1.87282e-06	1.30625e-05	1.07117	6.83721	8.07477e-12	1.51387e-10
Smarcd3	1.85263	14.465	2.01639e-47	4.31143e-46	1.26828	6.81361	9.51817e-12	1.22416e-10	1.79467	9.82094	9.14871e-23	4.02833e-21
Nr1h2	2.44148	14.4596	2.18094e-47	4.65011e-46	0.709268	3.83067	0.000127794	0.000649148	1.45368	6.3319	2.42159e-10	3.9688e-09
Gse1	1.81424	14.4485	2.56093e-47	5.45262e-46	2.22218	12.374	3.61449e-35	2.7101e-33	1.52017	6.25895	3.87581e-10	6.24575e-09
Ap3s2	2.03264	14.4438	2.74207e-47	5.8219e-46	1.15947	7.32476	2.39331e-13	3.61858e-12	1.08847	5.82302	5.77944e-09	8.12044e-08
Mcf2l	2.05803	14.4348	3.12758e-47	6.62179e-46	1.49844	8.59438	8.37173e-18	1.88042e-16	1.24204	7.10004	1.24721e-12	2.49542e-11
Samd1	2.35919	14.4148	4.17847e-47	8.8344e-46	1.59139	7.84418	4.35808e-15	7.72723e-14	2.09825	8.04256	8.79822e-16	2.22716e-14
Adgrl1	1.47555	14.4145	4.1954e-47	8.8578e-46	1.76576	12.8231	1.21735e-37	1.09298e-35	1.42053	8.22771	1.9082e-16	5.15378e-15
Cacna1i	1.86594	14.3897	6.00433e-47	1.26241e-45	2.67752	15.7524	6.6165e-56	2.22062e-53	2.21567	9.99546	1.59552e-23	7.28173e-22
Kcnq2	1.555	14.3509	1.05129e-46	2.2042e-45	2.34675	14.5206	8.96934e-48	1.68576e-45	1.82819	11.2966	1.3641e-29	9.69209e-28
Ctif	1.94743	14.3352	1.31805e-46	2.75968e-45	1.59585	9.43849	3.78204e-21	1.08578e-19	1.13747	5.65572	1.55195e-08	2.045e-07
Mgat5b	2.36528	14.3017	2.13572e-46	4.45935e-45	1.19431	6.68123	2.36938e-11	2.92459e-10	1.24859	5.66196	1.49655e-08	1.98246e-07
Sema6b	1.47772	14.3009	2.15909e-46	4.50192e-45	2.39836	13.5536	7.54304e-42	9.66606e-40	1.79647	10.3203	5.707e-25	2.96124e-23
Tmem250-ps	2.12783	14.2925	2.43611e-46	5.07255e-45	0.621733	3.90121	9.57113e-05	0.000499129	1.85059	8.53504	1.40107e-17	4.11275e-16
Kbtbd11	1.64556	14.2751	3.12678e-46	6.49279e-45	1.99912	11.0666	1.8218e-28	8.50333e-27	1.52861	7.47343	7.81288e-14	1.70506e-12
Rapgefl1	1.64496	14.2649	3.62259e-46	7.49147e-45	2.3939	13.5112	1.34399e-41	1.6055e-39	2.43902	12.4187	2.06798e-35	2.35091e-33
Lzts3	1.4778	14.2153	7.3621e-46	1.51625e-44	2.17876	13.4327	3.88728e-41	4.34882e-39	2.47175	13.9228	4.60587e-44	9.14229e-42
Mturn	2.14007	14.1025	3.66667e-45	7.46017e-44	0.562407	3.5251	0.000423322	0.00189614	1.51058	9.43784	3.80531e-21	1.49171e-19
Nrxn2	1.33681	14.1005	3.77215e-45	7.66446e-44	0.763311	5.52163	3.35876e-08	2.96649e-07	0.176305	1.66946	0.0950272	0.21784
Anapc5	1.90453	14.0467	8.06564e-45	1.63224e-43	1.2831	7.4603	8.63243e-14	1.34456e-12	1.43581	10.3603	3.75904e-25	2.00029e-23
Arf3	1.70513	14.0227	1.13224e-44	2.28215e-43	1.65514	10.6251	2.27856e-26	9.22948e-25	2.04498	15.7371	8.41991e-56	3.39648e-53
Zfp316	2.22005	13.9916	1.75513e-44	3.51887e-43	1.88842	9.26037	2.03718e-20	5.50116e-19	1.13949	5.59206	2.24393e-08	2.91083e-07
Cntnap1	1.66653	13.9793	2.08399e-44	4.16716e-43	1.43115	8.94433	3.74205e-19	9.09782e-18	1.19842	7.87645	3.36801e-15	8.19395e-14
Gpr27	2.67876	13.8976	6.54783e-44	1.29221e-42	1.5514	6.69479	2.15986e-11	2.67534e-10	1.98329	7.69925	1.36869e-14	3.21116e-13
Tbc1d9b	2.05542	13.893	6.98891e-44	1.37567e-42	0.405445	2.51805	0.0118006	0.034888	0.857113	4.79332	1.64045e-06	1.65035e-05
Ctnnd2	1.78026	13.8778	8.64101e-44	1.69644e-42	1.4179	9.47246	2.73319e-21	7.96013e-20	1.20359	7.87813	3.32315e-15	8.10059e-14
Larp1	1.60658	13.7764	3.53554e-43	6.8259e-42	1.78775	11.6335	2.78555e-31	1.5706e-29	1.50135	9.97561	1.94896e-23	8.83032e-22
Dohh	1.83404	13.7392	5.91228e-43	1.1371e-41	1.20055	6.40447	1.50888e-10	1.7257e-09	2.03492	9.5258	1.63769e-21	6.67079e-20
Insyn1	1.63482	13.7305	6.66309e-43	1.27987e-41	0.486249	2.82813	0.00468203	0.0159108	1.35494	7.87824	3.32025e-15	8.10059e-14
Nf2	1.81513	13.7247	7.22657e-43	1.38459e-41	0.844822	5.70564	1.15908e-08	1.07348e-07	1.17551	6.697	2.12746e-11	3.83342e-10
Brsk2	1.53599	13.7235	7.33909e-43	1.40437e-41	1.30425	7.56215	3.96457e-14	6.40878e-13	1.64092	9.78443	1.31332e-22	5.74231e-21
Rasgef1a	1.63962	13.6897	1.16969e-42	2.23543e-41	1.25592	7.99615	1.28368e-15	2.37776e-14	2.0948	13.0062	1.12829e-38	1.64062e-36
C1ql2	6.63842	13.6377	2.39067e-42	4.55735e-41	2.14883	8.68613	3.75002e-18	8.60916e-17	2.69877	4.45603	8.34914e-06	7.46824e-05
Sirt3	2.31319	13.6041	3.78571e-42	7.19856e-41	0.451891	2.38834	0.0169245	0.0469702	1.57726	7.15627	8.29005e-13	1.67475e-11
Rnf187	1.48835	13.5929	4.40973e-42	8.37461e-41	1.4858	9.19853	3.62893e-20	9.52576e-19	2.06326	11.8025	3.789e-32	3.43344e-30
Crlf2	3.03298	13.5098	1.3695e-41	2.57176e-40	1.46987	6.45489	1.08296e-10	1.25332e-09	1.56184	4.88286	1.04557e-06	1.07347e-05
Dctn1	1.45527	13.4489	3.12419e-41	5.8163e-40	1.88902	11.2408	2.56931e-29	1.24886e-27	1.8174	9.70262	2.93868e-22	1.27598e-20
Keap1	1.81003	13.4484	3.14579e-41	5.84932e-40	1.29762	7.00173	2.52826e-12	3.44333e-11	1.28834	7.16979	7.51116e-13	1.52727e-11
Abl1	2.01876	13.3165	1.85594e-40	3.40488e-39	1.07183	5.53255	3.15615e-08	2.79806e-07	0.824532	3.78016	0.000156727	0.00109674
Tbc1d22a	2.04715	13.3053	2.15677e-40	3.952e-39	1.48186	7.95407	1.80483e-15	3.29118e-14	1.51787	7.06981	1.55144e-12	3.08438e-11
Wnk2	1.45161	13.295	2.47352e-40	4.5269e-39	1.05155	6.86629	6.58939e-12	8.61634e-11	0.987144	5.42238	5.88109e-08	7.25992e-07
Orai2	1.52003	13.2418	5.03321e-40	9.15609e-39	1.00234	6.24974	4.11141e-10	4.49957e-09	2.05018	10.3755	3.20503e-25	1.72754e-23
Map2	1.55864	13.231	5.80812e-40	1.05531e-38	1.80275	12.3347	5.89126e-35	4.3707e-33	2.40245	9.96644	2.13761e-23	9.65011e-22
Scn1b	1.28031	13.1963	9.21252e-40	1.66387e-38	1.57399	10.8759	1.50105e-27	6.63287e-26	2.23134	12.0339	2.3562e-33	2.30189e-31
Adarb1	1.86045	13.1575	1.5418e-39	2.76482e-38	0.72827	4.21373	2.51184e-05	0.000146673	0.808684	4.57417	4.78104e-06	4.45838e-05
Zfp106	1.80198	13.1395	1.9548e-39	3.48475e-38	0.408368	2.71104	0.00670717	0.02162	0.631152	3.58104	0.000342232	0.00219355
Kctd17	1.80586	13.07	4.88903e-39	8.68477e-38	1.18243	7.03515	1.99047e-12	2.74726e-11	1.41362	9.00606	2.13585e-19	7.4191e-18
Kmt2d	1.42287	13.0468	6.63038e-39	1.17505e-37	1.87993	10.8677	1.64341e-27	7.19427e-26	1.20845	5.55396	2.79274e-08	3.59662e-07
Mafg	2.53889	13.0077	1.10617e-38	1.95121e-37	1.27903	6.13023	8.77543e-10	9.25195e-09	1.57787	5.96077	2.51057e-09	3.70221e-08
Tsc2	1.63701	12.9811	1.56715e-38	2.75153e-37	1.61769	9.35599	8.28207e-21	2.31176e-19	0.998799	5.38988	7.05032e-08	8.60979e-07
1700008O03Rik	3.2502	12.9605	2.05009e-38	3.59526e-37	1.41707	5.21046	1.88372e-07	1.50608e-06	1.52506	3.87597	0.000106201	0.000773021
Megf8	1.28646	12.9257	3.22365e-38	5.62725e-37	2.08664	14.5723	4.21337e-48	8.0259e-46	0.994021	6.75041	1.47429e-11	2.69533e-10
Ipo13	1.55218	12.9057	4.17928e-38	7.23691e-37	1.42823	7.88516	3.14129e-15	5.61925e-14	0.783323	3.49277	0.000478036	0.00294185
Jund	1.43718	12.8269	1.15931e-37	1.97802e-36	0.818746	5.09848	3.42394e-07	2.63593e-06	1.65619	9.54677	1.33808e-21	5.50417e-20
Fam89b	2.03556	12.7934	1.78504e-37	3.02516e-36	1.14875	5.7167	1.08612e-08	1.01257e-07	1.35587	5.16588	2.39305e-07	2.718e-06
Egln2	1.73184	12.7833	2.03233e-37	3.4327e-36	0.435566	2.48067	0.0131136	0.0381525	1.43984	8.29995	1.04159e-16	2.88805e-15
Bicdl1	2.7525	12.7626	2.65307e-37	4.46123e-36	1.01816	4.18361	2.86919e-05	0.00016589	1.61649	5.62111	1.89735e-08	2.47407e-07
Man2a2	1.44202	12.745	3.32283e-37	5.57505e-36	1.40261	9.28062	1.68499e-20	4.60304e-19	0.837792	4.63993	3.48532e-06	3.35261e-05
Trmt1	2.18241	12.6792	7.71507e-37	1.28023e-35	1.38002	6.92308	4.41919e-12	5.87668e-11	1.53715	7.31799	2.51717e-13	5.28142e-12
6530402F18Rik	3.37872	12.6641	9.34348e-37	1.54535e-35	1.32983	5.51543	3.47921e-08	3.06902e-07	1.23511	3.92271	8.75593e-05	0.00064981
Prr12	1.47325	12.6379	1.30447e-36	2.15045e-35	1.75965	11.3102	1.16878e-29	5.82161e-28	1.66796	8.24972	1.58771e-16	4.31616e-15
Aff3	1.66498	12.6311	1.42235e-36	2.34222e-35	1.46722	8.27495	1.28515e-16	2.62543e-15	1.23797	5.88967	3.86964e-09	5.5493e-08
Myo7a	2.78405	12.5842	2.57849e-36	4.22308e-35	1.10779	4.95341	7.29224e-07	5.39021e-06	0.825575	3.18465	0.0014493	0.00765999
Phc1	2.10658	12.5792	2.74763e-36	4.49523e-35	0.518846	2.81233	0.00491836	0.0166058	1.36955	5.83236	5.465e-09	7.68727e-08
Ttc7b	1.75751	12.5765	2.84433e-36	4.6484e-35	1.04855	6.06784	1.2964e-09	1.33974e-08	1.47464	10.0336	1.08444e-23	5.00403e-22
Rab43	2.60785	12.571	3.04878e-36	4.96643e-35	0.74563	3.71493	0.000203259	0.000980878	1.13043	4.21386	2.51047e-05	0.000205186
Extl1	1.49876	12.544	4.28566e-36	6.96628e-35	2.17487	12.6153	1.73861e-36	1.41662e-34	1.85781	10.3402	4.63678e-25	2.42607e-23
Ehd1	1.6794	12.5119	6.43017e-36	1.03876e-34	1.33688	8.02626	1.00486e-15	1.88609e-14	1.10644	5.98858	2.11677e-09	3.13628e-08
Iqsec1	1.50942	12.4949	7.95758e-36	1.27837e-34	1.37408	8.23126	1.85251e-16	3.72511e-15	1.07817	5.51261	3.53542e-08	4.47927e-07
Vps51	1.58356	12.4776	9.89711e-36	1.58322e-34	1.97065	10.2659	1.00367e-24	3.65573e-23	1.59923	6.13874	8.31778e-10	1.2889e-08
Lynx1	1.38479	12.47	1.08847e-35	1.7357e-34	1.14846	7.24159	4.43464e-13	6.55248e-12	1.63922	13.8444	1.37592e-43	2.68843e-41
Snx27	1.57091	12.4374	1.63785e-35	2.6002e-34	1.35949	8.34324	7.22796e-17	1.5139e-15	1.44847	6.58077	4.68028e-11	8.17416e-10
Zer1	1.34332	12.4208	2.01526e-35	3.18003e-34	2.07632	12.3285	6.36273e-35	4.69576e-33	1.29536	7.16093	8.01297e-13	1.62139e-11
Dync1h1	1.40097	12.4009	2.58428e-35	4.06943e-34	1.45455	10.9149	9.7843e-28	4.39234e-26	0.168704	0.843414	0.398997	0.587548
Stum	1.38361	12.3859	3.11422e-35	4.88357e-34	1.4371	9.90617	3.91347e-23	1.31031e-21	1.9886	11.8689	1.71776e-32	1.57945e-30
Fastk	1.8985	12.3776	3.45467e-35	5.41183e-34	0.645517	3.56138	0.000368906	0.00167962	1.20736	6.07086	1.27225e-09	1.93782e-08
Sh3pxd2a	1.86053	12.377	3.48249e-35	5.44978e-34	1.70343	9.76837	1.5391e-22	4.95322e-21	1.0709	5.54638	2.91651e-08	3.74445e-07
9330102E08Rik	2.28869	12.3763	3.51307e-35	5.48626e-34	1.43524	6.47797	9.29624e-11	1.08387e-09	1.27352	4.93099	8.18156e-07	8.5401e-06
Rab11fip5	1.76729	12.3444	5.22176e-35	8.12948e-34	1.31249	7.56238	3.9575e-14	6.4047e-13	1.38418	7.28745	3.15872e-13	6.53971e-12
Sox11	2.49422	12.3265	6.51917e-35	1.01285e-33	0.872545	4.12455	3.71457e-05	0.000210199	0.604679	2.35674	0.0184362	0.0629732
Gpr137	1.92287	12.3092	8.08391e-35	1.25081e-33	0.708107	3.9759	7.01134e-05	0.000375501	1.34769	6.77734	1.22409e-11	2.25437e-10
Dusp7	1.53143	12.3045	8.56829e-35	1.32441e-33	1.27969	7.57798	3.50966e-14	5.72595e-13	1.26146	7.35239	1.94699e-13	4.13364e-12
Map3k9	2.24083	12.283	1.11749e-34	1.71853e-33	1.30087	6.95471	3.53297e-12	4.74745e-11	1.1334	4.53261	5.82594e-06	5.35293e-05
Nol4l	2.04093	12.2433	1.82351e-34	2.77325e-33	1.42157	7.4231	1.14408e-13	1.77219e-12	1.25096	5.54168	2.99586e-08	3.84239e-07
Fam57b	1.90594	12.2153	2.57553e-34	3.90875e-33	1.07515	5.63889	1.71146e-08	1.55945e-07	1.88144	8.469	2.47516e-17	7.14823e-16
Pcif1	1.98653	12.1647	4.79468e-34	7.20489e-33	0.85903	4.53002	5.89769e-06	3.82752e-05	0.869509	3.74986	0.000176935	0.00121838
Cbx7	2.06034	12.1543	5.4413e-34	8.13611e-33	0.988151	5.18216	2.19331e-07	1.73301e-06	1.48839	6.03447	1.59484e-09	2.40573e-08
Btbd9	1.27448	12.1536	5.4876e-34	8.19724e-33	1.78371	11.1957	4.27864e-29	2.06547e-27	1.2873	8.22448	1.96035e-16	5.26055e-15
Cdc42bpa	1.3919	12.1282	7.48855e-34	1.11312e-32	0.799468	6.11052	9.93042e-10	1.03919e-08	0.664413	2.95648	0.0031117	0.0147226
Mecp2	1.71601	12.1077	9.61799e-34	1.42405e-32	1.19283	7.52998	5.0747e-14	8.11031e-13	1.13293	6.79756	1.06405e-11	1.98004e-10
Rab15	1.66187	12.1038	1.00809e-33	1.49113e-32	0.787705	4.94448	7.63466e-07	5.62562e-06	1.68916	8.74189	2.29248e-18	7.25758e-17
Pou3f1	1.17167	12.084	1.28326e-33	1.89629e-32	2.78578	16.1146	2.01578e-58	8.35719e-56	2.65994	14.585	3.49806e-48	9.30708e-46
Atp9a	1.26719	12.059	1.73801e-33	2.56077e-32	1.93177	10.9363	7.72621e-28	3.49066e-26	1.66148	11.3647	6.2645e-30	4.50216e-28
Miga1	1.53601	12.053	1.87016e-33	2.74744e-32	0.965129	6.11981	9.36857e-10	9.82584e-09	0.671067	3.98774	6.67071e-05	0.000508022
Tgfb1i1	3.01176	12.0108	3.11748e-33	4.55332e-32	1.19458	4.72624	2.28711e-06	1.5819e-05	2.07531	5.14017	2.74483e-07	3.07564e-06
Nat8l	1.238	11.9652	5.40711e-33	7.85199e-32	1.57923	9.58105	9.60634e-22	2.8934e-20	1.88513	10.1764	2.52648e-24	1.21983e-22
Cbarp	1.21625	11.9616	5.64319e-33	8.1791e-32	1.73123	10.5091	7.84417e-26	3.10594e-24	1.82403	11.6354	2.72232e-31	2.34777e-29
Dyrk1b	2.14512	11.9569	5.9752e-33	8.64374e-32	1.77333	7.25332	4.06688e-13	6.02804e-12	0.278775	1.02464	0.305534	0.491788
Cdk10	1.88272	11.9547	6.13452e-33	8.85727e-32	0.528727	2.90448	0.00367858	0.0129471	1.46825	6.19219	5.93324e-10	9.37992e-09
Diras1	1.58742	11.9471	6.72015e-33	9.6751e-32	0.978875	6.08406	1.17177e-09	1.2163e-08	0.93479	5.72578	1.02961e-08	1.40101e-07
Npas2	1.98648	11.934	7.87404e-33	1.13148e-31	1.39757	6.42519	1.31705e-10	1.51305e-09	1.51315	5.22658	1.72673e-07	2.0049e-06
Limk2	1.79808	11.9182	9.51726e-33	1.36501e-31	1.41666	8.03798	9.13343e-16	1.72119e-14	1.30755	7.37598	1.63144e-13	3.50536e-12
Zfand2a	1.97779	11.8998	1.18578e-32	1.68949e-31	0.596809	3.33088	0.000865731	0.00360299	1.49173	5.2751	1.32687e-07	1.57424e-06
Capn5	1.75567	11.8867	1.38783e-32	1.9755e-31	1.61229	7.88249	3.20911e-15	5.73328e-14	1.39589	6.41719	1.38817e-10	2.3332e-09
Gigyf1	1.92359	11.8779	1.54244e-32	2.19351e-31	1.24619	6.48978	8.59614e-11	1.00808e-09	0.824787	3.87677	0.000105852	0.000770926
Jak3	3.63431	11.8537	2.05957e-32	2.92069e-31	1.70541	6.40441	1.5095e-10	1.7257e-09	1.07868	3.29723	0.000976441	0.00546571
Zfp236	2.15005	11.836	2.54203e-32	3.59811e-31	1.1968	5.41474	6.1379e-08	5.24045e-07	1.13119	4.29933	1.71319e-05	0.000144168
Pkp4	1.38019	11.7991	3.9436e-32	5.53288e-31	0.756749	4.80374	1.55727e-06	1.09756e-05	1.41133	8.94467	3.73057e-19	1.27461e-17
Chtf8	1.64899	11.7991	3.94552e-32	5.53288e-31	1.66929	9.5895	8.85088e-22	2.6773e-20	1.92939	9.42369	4.35493e-21	1.69652e-19
Carm1	1.53909	11.7728	5.38942e-32	7.5228e-31	1.23337	7.08954	1.34561e-12	1.89868e-11	0.924619	5.86778	4.41679e-09	6.30503e-08
Srebf2	1.4415	11.7582	6.40548e-32	8.92457e-31	0.669059	3.81154	0.000138101	0.000693754	1.18288	6.39776	1.5767e-10	2.6324e-09
Ap2a2	1.34071	11.703	1.23049e-31	1.69876e-30	2.02265	12.111	9.23632e-34	6.19977e-32	1.3955	8.05321	8.06488e-16	2.054e-14
Foxk2	1.68434	11.7015	1.25165e-31	1.72639e-30	1.25939	6.58255	4.62455e-11	5.57636e-10	1.64212	9.57651	1.00381e-21	4.21231e-20
Stx1b	1.66156	11.6923	1.39484e-31	1.92213e-30	1.15038	5.48555	4.12175e-08	3.59976e-07	2.06707	6.17694	6.53556e-10	1.02544e-08
Fcho1	1.76734	11.683	1.55771e-31	2.13683e-30	1.85277	8.74182	2.2938e-18	5.31799e-17	1.70748	7.4614	8.5606e-14	1.86499e-12
Ndst1	1.84393	11.6627	1.97581e-31	2.70058e-30	0.817554	4.467	7.93224e-06	5.04343e-05	0.957311	3.85751	0.000114549	0.000826563
Cyhr1	1.41859	11.6388	2.61706e-31	3.56415e-30	0.637676	4.20551	2.60498e-05	0.000151547	0.953297	6.8773	6.09989e-12	1.15574e-10
Ank1	2.07978	11.5564	6.85221e-31	9.25691e-30	1.1667	5.69619	1.22514e-08	1.13169e-07	0.765347	3.71382	0.000204151	0.00138219
Sema6c	1.94889	11.5561	6.8779e-31	9.28333e-30	1.75484	9.00752	2.10767e-19	5.21223e-18	1.18434	4.95601	7.19568e-07	7.54249e-06
Ccdc85b	1.57905	11.5526	7.16261e-31	9.65898e-30	0.709443	3.60213	0.000315622	0.00145773	1.6688	8.88181	6.57829e-19	2.17049e-17
Rab1b	1.28701	11.5411	8.18461e-31	1.10077e-29	0.936276	5.62238	1.88344e-08	1.71063e-07	0.676994	4.05587	4.99474e-05	0.000389397
Klhl29	1.76676	11.437	2.7308e-30	3.62755e-29	1.54434	7.54628	4.47882e-14	7.20701e-13	1.15718	5.0614	4.16196e-07	4.54941e-06
Ncaph2	1.40396	11.4354	2.78196e-30	3.68904e-29	1.15541	6.91771	4.58993e-12	6.08651e-11	1.34678	8.22679	1.92305e-16	5.18271e-15
Mn1	1.66826	11.3927	4.54605e-30	5.98348e-29	2.63503	11.904	1.12795e-32	6.88294e-31	1.89217	5.27563	1.32303e-07	1.57118e-06
Zfp777	1.75233	11.3672	6.09266e-30	7.97426e-29	1.75732	9.29533	1.46752e-20	4.04027e-19	1.89806	8.06954	7.05619e-16	1.81933e-14
Dhx34	2.74252	11.3453	7.82281e-30	1.01509e-28	0.943379	3.70933	0.000207812	0.00100007	0.7336	2.6111	0.00902518	0.0357717
Mark2	1.37169	11.3316	9.15005e-30	1.18527e-28	1.31909	7.51571	5.66008e-14	9.01519e-13	1.2779	8.06264	7.46634e-16	1.91718e-14
Inafm2	1.55755	11.3178	1.07113e-29	1.38396e-28	1.17635	6.99013	2.7463e-12	3.72587e-11	2.05984	8.62914	6.18125e-18	1.86707e-16
Pbx1	1.45819	11.2546	2.19803e-29	2.81829e-28	1.05371	6.93777	3.98351e-12	5.33253e-11	0.904044	7.36462	1.77655e-13	3.79756e-12
Kcnmb4	2.05305	11.2491	2.33892e-29	2.99132e-28	0.504015	2.4173	0.015636	0.0440897	1.47928	6.19273	5.91313e-10	9.35996e-09
Bean1	2.70144	11.2104	3.62369e-29	4.60331e-28	0.913674	3.73743	0.000185914	0.000905858	1.40772	4.19036	2.78513e-05	0.000226156
Wdr90	3.03315	11.195	4.31472e-29	5.45365e-28	2.58659	8.94429	3.74343e-19	9.09782e-18	1.75676	3.69579	0.000219202	0.00147135
Dop1b	1.51179	11.1907	4.52916e-29	5.71991e-28	1.69798	10.8618	1.7522e-27	7.62316e-26	1.01934	4.43164	9.35186e-06	8.28293e-05
Nomo1	1.43041	11.1681	5.84189e-29	7.35319e-28	1.36188	7.83707	4.6119e-15	8.13634e-14	1.53178	8.86515	7.63995e-19	2.50755e-17
Foxo6	1.69135	11.1369	8.29887e-29	1.03853e-27	2.3266	11.2789	1.6686e-29	8.19534e-28	2.02094	8.23593	1.78169e-16	4.82251e-15
Atxn1	1.55928	11.12	1.00285e-28	1.25291e-27	1.55854	9.13543	6.51485e-20	1.6697e-18	0.849299	3.48197	0.000497736	0.00304213
Rbfox2	1.39468	11.1036	1.20494e-28	1.49918e-27	1.69311	10.324	5.4915e-25	2.04443e-23	1.77856	10.4976	8.85622e-26	4.92209e-24
Tln2	1.70448	11.1016	1.23235e-28	1.52951e-27	2.11261	12.4823	9.33031e-36	7.30667e-34	1.92412	7.66231	1.82622e-14	4.20568e-13
Smg5	1.50456	11.0392	2.47162e-28	3.04263e-27	1.24169	7.28243	3.27858e-13	4.89564e-12	1.06365	5.85937	4.64614e-09	6.60226e-08
2010300C02Rik	1.16169	11.0226	2.97483e-28	3.65614e-27	2.85664	17.7255	2.66322e-70	2.50271e-67	2.24596	8.92803	4.33656e-19	1.46169e-17
Tmem28	2.81433	10.9864	4.44406e-28	5.42656e-27	1.92015	6.82937	8.5289e-12	1.10095e-10	1.91395	4.42616	9.59264e-06	8.45355e-05
Ppm1f	1.81185	10.9832	4.60164e-28	5.61445e-27	1.22859	6.22508	4.81303e-10	5.23896e-09	1.20933	5.31299	1.07843e-07	1.28927e-06
Ctc1	2.01175	10.9351	7.83582e-28	9.51439e-27	1.62532	7.99754	1.26929e-15	2.3573e-14	0.894611	4.15543	3.24677e-05	0.000261099
Dlgap1	1.19948	10.9103	1.02882e-27	1.2472e-26	2.03922	13.6351	2.47803e-42	3.35869e-40	1.44821	9.2327	2.63894e-20	9.85074e-19
Mroh1	1.81264	10.8851	1.35749e-27	1.64301e-26	1.51455	6.46855	9.89483e-11	1.14986e-09	0.826419	3.85537	0.000115553	0.000832849
Slc29a4	2.34192	10.8552	1.88423e-27	2.26964e-26	1.34743	5.89833	3.67195e-09	3.6221e-08	1.57652	4.96273	6.95106e-07	7.30445e-06
Fam53b	2.15372	10.844	2.12926e-27	2.55866e-26	0.672275	2.96597	0.00301731	0.0108666	0.675774	2.56191	0.0104098	0.0400535
Ubr4	1.27953	10.8181	2.82568e-27	3.38477e-26	1.1542	7.82658	5.01331e-15	8.83346e-14	0.246005	1.18091	0.237639	0.416477
Scyl1	1.61004	10.8054	3.24714e-27	3.88346e-26	0.877383	5.03364	4.81257e-07	3.64133e-06	0.465534	2.57405	0.0100515	0.0389267
Ncor2	1.09869	10.803	3.32989e-27	3.97928e-26	1.80284	10.8661	1.67234e-27	7.29825e-26	1.37005	9.22014	2.96717e-20	1.10102e-18
Fbxw5	1.396	10.7512	5.85121e-27	6.95383e-26	0.996327	5.71087	1.12403e-08	1.04308e-07	1.0294	6.2214	4.9275e-10	7.83949e-09
Hr	3.09855	10.7443	6.30576e-27	7.48227e-26	0.832375	3.38327	0.000716295	0.00304032	0.395346	1.26409	0.206199	0.375988
Rgl2	2.67556	10.743	6.39328e-27	7.58017e-26	0.87943	3.52071	0.000430396	0.00192415	0.535403	1.55443	0.120082	0.25748
Pgs1	1.61456	10.7326	7.15239e-27	8.47356e-26	0.789494	4.23582	2.27718e-05	0.000134025	1.28319	6.80353	1.02088e-11	1.90256e-10
Sh3rf3	2.11476	10.7323	7.17549e-27	8.49427e-26	1.36367	6.02504	1.69063e-09	1.72066e-08	1.22006	4.08037	4.49635e-05	0.000353405
Spef1	2.72728	10.7249	7.776e-27	9.18358e-26	0.763597	3.23065	0.00123508	0.00493471	0.782913	2.71786	0.0065705	0.0275996
Ppp2r5b	1.37511	10.7008	1.00893e-26	1.18416e-25	1.02488	5.96077	2.51046e-09	2.52047e-08	1.46193	8.04389	8.70316e-16	2.20757e-14
Phrf1	1.6129	10.6974	1.04666e-26	1.22749e-25	2.12132	11.5174	1.07795e-30	5.75558e-29	1.10094	5.58401	2.35031e-08	3.04251e-07
Otud7a	1.56798	10.6915	1.11589e-26	1.30464e-25	1.95684	10.2806	8.61695e-25	3.15492e-23	1.64807	5.81987	5.88921e-09	8.23764e-08
Kansl3	1.67891	10.6676	1.44381e-26	1.68411e-25	0.929923	5.30418	1.13181e-07	9.36816e-07	1.09628	5.09112	3.55948e-07	3.93209e-06
Celf3	1.26249	10.6475	1.79101e-26	2.08428e-25	1.6639	10.4037	2.38581e-25	9.13869e-24	2.16364	7.35206	1.95174e-13	4.13669e-12
Btbd6	1.56865	10.6422	1.89524e-26	2.20049e-25	1.12945	6.24918	4.12617e-10	4.51222e-09	1.93052	7.42418	1.13478e-13	2.4551e-12
Rbm15b	1.77847	10.6392	1.95703e-26	2.26874e-25	1.62563	8.10991	5.06568e-16	9.68871e-15	1.49703	6.04802	1.46635e-09	2.21726e-08
Ap2a1	1.05681	10.6163	2.50279e-26	2.89256e-25	1.87581	12.7077	5.35727e-37	4.52192e-35	1.11332	8.59574	8.27312e-18	2.4691e-16
Itpk1	1.6383	10.6133	2.58416e-26	2.98204e-25	1.07809	5.90685	3.48712e-09	3.44944e-08	0.78868	4.17584	2.96888e-05	0.000239986
Aplp1	1.01346	10.5999	2.98456e-26	3.43622e-25	1.59883	11.3716	5.79234e-30	2.91603e-28	1.42154	13.1753	1.21788e-39	1.9037e-37
Rusc2	1.22101	10.5765	3.8298e-26	4.39265e-25	2.28367	13.522	1.15945e-41	1.42119e-39	1.23082	7.16268	7.9116e-13	1.60348e-11
Ksr2	2.16468	10.5624	4.45124e-26	5.09382e-25	1.75052	6.44175	1.18107e-10	1.36127e-09	1.15803	2.86318	0.00419409	0.0188727
Tubg2	1.61122	10.5266	6.51115e-26	7.42861e-25	1.58843	8.1088	5.11241e-16	9.76485e-15	2.09418	7.32014	2.47713e-13	5.20615e-12
Snx21	1.97343	10.4913	9.46813e-26	1.07535e-24	0.909528	4.24243	2.21112e-05	0.000130301	1.38585	5.21791	1.80955e-07	2.09135e-06
Sipa1l3	1.19455	10.3702	3.38906e-25	3.80344e-24	2.49602	14.9791	1.0062e-50	2.44542e-48	1.86704	10.4536	1.41106e-25	7.80763e-24
4933409K07Rik	1.92951	10.3562	3.92373e-25	4.39696e-24	0.789223	4.23557	2.27969e-05	0.000134117	0.729729	2.73069	0.00632015	0.0267185
Asphd2	1.35759	10.3442	4.44651e-25	4.97174e-24	1.13006	6.26713	3.67767e-10	4.04057e-09	1.85063	8.73527	2.43077e-18	7.63739e-17
Cdh22	1.978	10.3232	5.53743e-25	6.17781e-24	1.99085	9.05948	1.31071e-19	3.2875e-18	1.9423	6.60158	4.06794e-11	7.13459e-10
Neurl4	1.23485	10.292	7.65996e-25	8.49564e-24	1.69262	9.89359	4.43808e-23	1.47894e-21	1.44235	7.59787	3.01055e-14	6.77104e-13
Unc80	1.4097	10.2871	8.05579e-25	8.92811e-24	1.19956	6.7326	1.66663e-11	2.0864e-10	1.62172	7.10075	1.24079e-12	2.48656e-11
Spns2	1.50389	10.2829	8.41574e-25	9.31338e-24	1.0776	6.08634	1.1552e-09	1.19998e-08	1.49108	6.50496	7.77127e-11	1.33123e-09
Tcf25	1.11846	10.2716	9.45885e-25	1.04448e-23	1.42419	9.11776	7.66947e-20	1.95142e-18	1.50138	11.0259	2.86648e-28	1.86694e-26
Fkbp8	1.11362	10.2607	1.05976e-24	1.16852e-23	1.03639	6.20492	5.47245e-10	5.90656e-09	1.5928	10.5642	4.36575e-26	2.44815e-24
Adora1	1.25705	10.2306	1.44609e-24	1.58755e-23	1.67468	10.748	6.05488e-27	2.53263e-25	1.83997	10.2394	1.32013e-24	6.52501e-23
Tspoap1	1.26631	10.2037	1.90857e-24	2.08016e-23	1.67292	10.7126	8.88646e-27	3.66268e-25	1.85783	7.75059	9.1463e-15	2.17442e-13
Tmem94	1.42268	10.1762	2.53316e-24	2.74704e-23	0.970608	5.59836	2.16391e-08	1.94904e-07	0.685975	3.80639	0.00014101	0.000995817
Ap5z1	2.47211	10.1473	3.4083e-24	3.68023e-23	1.30898	5.26524	1.40004e-07	1.14339e-06	0.6161	2.15131	0.0314516	0.0955081
Ltk	2.15915	10.116	4.69439e-24	5.03655e-23	2.58464	9.40655	5.12693e-21	1.4425e-19	2.82557	6.09314	1.1072e-09	1.69676e-08
Rnf123	1.57567	10.1032	5.34536e-24	5.71874e-23	1.67338	7.51515	5.68442e-14	9.04375e-13	1.10182	5.40487	6.48568e-08	7.95911e-07
Tuba1b	0.967437	10.1021	5.40726e-24	5.78087e-23	1.09328	8.10333	5.34728e-16	1.01996e-14	0.335492	3.29377	0.000988525	0.00552593
Ipo9	1.54686	10.0847	6.4533e-24	6.87972e-23	0.705648	4.06695	4.76315e-05	0.000263817	1.10674	4.09905	4.14848e-05	0.000328542
Ttll3	3.02504	10.0807	6.72344e-24	7.16267e-23	1.74552	5.8905	3.85035e-09	3.78747e-08	1.8414	4.38103	1.18119e-05	0.000102433
Armc5	2.2162	10.078	6.91009e-24	7.35632e-23	1.29467	5.31341	1.07594e-07	8.92671e-07	0.675547	2.72411	0.00644759	0.027193
Nfkb2	3.48782	10.0728	7.2879e-24	7.74762e-23	1.64163	5.15432	2.54556e-07	1.99678e-06	0.947831	2.46123	0.0138463	0.0504657
Plod3	1.89004	10.0705	7.4592e-24	7.92416e-23	0.68643	3.49639	0.000471606	0.00208655	0.134748	0.572395	0.567054	0.724429
Slc4a3	1.39462	10.0649	7.89712e-24	8.37172e-23	0.911108	5.21915	1.79743e-07	1.44368e-06	0.824818	4.68081	2.8574e-06	2.78502e-05
Wipf2	1.33526	10.0509	9.10608e-24	9.6129e-23	0.711683	4.53914	5.64839e-06	3.67586e-05	1.42179	8.58704	8.92421e-18	2.64448e-16
Dcaf11	1.52976	10.0005	1.51649e-23	1.58869e-22	0.831436	4.79222	1.64946e-06	1.15848e-05	0.485907	2.83902	0.00452518	0.0201164
Arhgef7	1.3505	9.98819	1.71694e-23	1.79247e-22	1.3999	7.75921	8.54631e-15	1.48178e-13	1.69208	6.96187	3.35797e-12	6.50022e-11
Cacna1a	1.19905	9.97818	1.89914e-23	1.97859e-22	2.03515	11.42	3.3238e-30	1.70372e-28	1.83295	5.74722	9.07204e-09	1.2494e-07
Gm3893	2.74762	9.95807	2.32526e-23	2.41421e-22	1.31035	4.85108	1.22789e-06	8.77705e-06	0.135448	0.268365	0.788418	0.876803
Ksr1	1.29192	9.93204	3.02022e-23	3.12502e-22	2.28591	10.8969	1.19286e-27	5.30429e-26	2.00715	7.38745	1.49671e-13	3.22141e-12
Usp31	1.51793	9.91235	3.67906e-23	3.79374e-22	1.5123	8.68563	3.76645e-18	8.63281e-17	1.15043	4.55141	5.32863e-06	4.92495e-05
Rhbdl1	1.57504	9.90678	3.88983e-23	4.00562e-22	0.835115	4.24396	2.19613e-05	0.000129526	1.37595	5.93066	3.01711e-09	4.3769e-08
Zfp865	1.75087	9.89953	4.18227e-23	4.28923e-22	1.37346	6.04317	1.51119e-09	1.54472e-08	1.79492	5.65648	1.54506e-08	2.03808e-07
Srrm3	1.50988	9.88064	5.05082e-23	5.16249e-22	1.73454	7.6612	1.84203e-14	3.09848e-13	1.95675	7.30625	2.74703e-13	5.73482e-12
Rps6ka2	1.95392	9.87875	5.14691e-23	5.25715e-22	1.71363	7.02721	2.10697e-12	2.89472e-11	1.87413	5.40655	6.42519e-08	7.89263e-07
Ip6k1	1.21367	9.86064	6.16578e-23	6.28087e-22	1.53682	10.2734	9.28253e-25	3.38981e-23	1.29174	7.49407	6.67694e-14	1.46483e-12
Mapk8ip2	1.23821	9.84546	7.17126e-23	7.27082e-22	0.747121	4.51884	6.21807e-06	4.02001e-05	1.49038	7.69813	1.38077e-14	3.23344e-13
Lats2	1.73616	9.79269	1.21034e-22	1.21411e-21	1.05213	5.20386	1.95194e-07	1.55537e-06	1.14473	3.33689	0.00084722	0.00483766
Mlst8	1.75642	9.78051	1.36526e-22	1.36679e-21	1.22244	5.92278	3.16554e-09	3.14678e-08	0.45778	2.03404	0.0419472	0.120007
Slc38a10	1.4052	9.73825	2.07095e-22	2.05693e-21	1.06138	5.90263	3.57757e-09	3.53147e-08	0.259571	1.23517	0.216766	0.390192
Prkcb	1.17083	9.73287	2.18343e-22	2.16155e-21	2.52674	18.1631	1.01205e-73	1.01899e-70	2.21009	12.2639	1.41505e-34	1.4996e-32
Zfr	1.32334	9.66803	4.12243e-22	4.0493e-21	1.47431	10.0211	1.23144e-23	4.22344e-22	1.77454	7.37208	1.6798e-13	3.5969e-12
Fbxl18	1.46704	9.64083	5.37514e-22	5.25705e-21	1.71217	7.8905	3.00987e-15	5.39785e-14	1.29322	4.45308	8.46472e-06	7.56621e-05
Mpp2	1.04035	9.64033	5.40115e-22	5.27791e-21	1.36674	8.46246	2.61795e-17	5.70365e-16	1.71934	8.09599	5.68027e-16	1.47369e-14
Pigq	1.54443	9.63441	5.72175e-22	5.58397e-21	0.55005	3.33041	0.00086717	0.00360792	0.971708	4.73467	2.19413e-06	2.16556e-05
Stxbp2	2.79478	9.58937	8.86212e-22	8.58774e-21	0.954343	3.34806	0.000813803	0.00341308	1.40544	3.32604	0.000880894	0.00500936
Phlpp1	1.29145	9.57149	1.05375e-21	1.01982e-20	0.954548	6.29205	3.13304e-10	3.4747e-09	0.0142419	0.0720582	0.942556	0.968501
Sh2d5	1.41693	9.56494	1.1227e-21	1.08239e-20	1.74188	7.99113	1.33705e-15	2.47013e-14	1.76712	7.35109	1.96602e-13	4.15991e-12
Zfp142	1.86523	9.52497	1.65092e-21	1.58658e-20	1.43785	7.01074	2.37054e-12	3.23791e-11	0.927465	3.91069	9.20341e-05	0.00067939
Mgrn1	1.05778	9.51505	1.8163e-21	1.74219e-20	1.05264	6.5439	5.99336e-11	7.12932e-10	0.801041	6.01397	1.81038e-09	2.70803e-08
Irgq	1.28236	9.50271	2.045e-21	1.95784e-20	1.52161	9.12194	7.37895e-20	1.88431e-18	1.19182	4.78789	1.68545e-06	1.69018e-05
Zswim8	1.14683	9.49329	2.23846e-21	2.13764e-20	1.80829	11.283	1.59235e-29	7.84818e-28	1.08122	5.66036	1.51058e-08	1.99681e-07
Tubb5	1.00707	9.47984	2.5468e-21	2.41834e-20	1.54767	11.0072	3.52957e-28	1.61012e-26	0.71806	5.8508	4.89214e-09	6.92823e-08
Flrt1	1.55774	9.45544	3.2168e-21	3.04307e-20	1.2144	6.16543	7.02915e-10	7.52338e-09	0.638201	2.96444	0.0030323	0.0143959
Arhgef25	1.03557	9.43837	3.78622e-21	3.56834e-20	1.57042	10.4511	1.44824e-25	5.67066e-24	2.28482	12.0056	3.32159e-33	3.14671e-31
Phospho1	2.25582	9.43586	3.87788e-21	3.65246e-20	1.40581	5.13048	2.89004e-07	2.25321e-06	2.33875	6.61824	3.63491e-11	6.40205e-10
Zfp592	1.76502	9.41974	4.52218e-21	4.24871e-20	0.798032	3.76455	0.000166849	0.000822631	0.0529517	0.266794	0.789628	0.877091
Gtpbp6	2.03527	9.41759	4.61548e-21	4.33098e-20	0.803423	3.3107	0.000930634	0.00384698	1.14111	3.38395	0.000714521	0.00418505
Pip4k2b	1.12932	9.39348	5.80518e-21	5.42044e-20	1.34106	8.35592	6.49246e-17	1.36187e-15	1.2287	6.19038	6.00195e-10	9.47656e-09
C030006K11Rik	3.02538	9.33779	9.83692e-21	9.10065e-20	0.635994	2.36416	0.0180711	0.0497035	0.529828	1.62432	0.104308	0.232792
Vrk3	1.72746	9.33516	1.00842e-20	9.31799e-20	0.980433	4.1208	3.77562e-05	0.000213311	1.13159	3.96405	7.36885e-05	0.00055611
Cmip	0.994027	9.31963	1.16748e-20	1.07614e-19	1.60616	12.0621	1.67431e-33	1.08761e-31	1.22967	8.10333	5.34764e-16	1.39317e-14
Rptor	1.17524	9.31251	1.24844e-20	1.15007e-19	1.70921	9.91127	3.71879e-23	1.25107e-21	0.727891	3.77349	0.000160978	0.0011246
Paxip1	1.78815	9.28263	1.65353e-20	1.51862e-19	0.803959	4.13942	3.48178e-05	0.000198059	1.27743	4.96327	6.93149e-07	7.29002e-06
Apba3	2.50934	9.17362	4.57395e-20	4.12065e-19	0.663652	2.59752	0.00938997	0.028818	1.03759	3.27273	0.00106515	0.00589628
Nol6	1.03284	9.15825	5.27453e-20	4.74896e-19	2.20339	12.5578	3.60002e-36	2.89977e-34	1.02334	6.59898	4.13982e-11	7.25049e-10
Foxo3	2.35952	9.09029	9.87715e-20	8.82463e-19	1.20592	4.24145	2.22084e-05	0.000130819	0.76179	1.82857	0.0674635	0.169984
Foxp4	1.25216	9.04295	1.52502e-19	1.35451e-18	1.94209	8.43524	3.30528e-17	7.10233e-16	2.08047	9.61561	6.87013e-22	2.91224e-20
Rnf166	1.80331	9.02292	1.83146e-19	1.62192e-18	0.506394	2.43389	0.0149376	0.0424097	1.05543	3.56653	0.000361745	0.00231033
Zfp628	1.87257	8.96477	3.10926e-19	2.72637e-18	1.75718	5.83651	5.3305e-09	5.17128e-08	1.52896	5.03108	4.87724e-07	5.28051e-06
Mnt	1.34373	8.93661	4.01282e-19	3.49964e-18	1.25873	6.53097	6.53443e-11	7.74028e-10	1.7973	7.75821	8.61397e-15	2.05568e-13
Hs3st4	1.56839	8.92766	4.35123e-19	3.78903e-18	1.21303	7.46834	8.12128e-14	1.26775e-12	1.68228	9.35555	8.31646e-21	3.17065e-19
Fam120a	1.10438	8.92392	4.5005e-19	3.91676e-18	0.582317	3.55916	0.000372038	0.00169279	0.459531	2.41457	0.0157536	0.0557046
Vapb	1.26894	8.92059	4.63815e-19	4.03191e-18	0.586708	3.28827	0.00100806	0.00411212	1.17695	5.11713	3.10216e-07	3.4421e-06
2020-03-09	1.64316	8.90039	5.56501e-19	4.82375e-18	1.59817	6.79565	1.07829e-11	1.37552e-10	1.95611	5.42575	5.77127e-08	7.13139e-07
Cacng2	1.5643	8.88709	6.27318e-19	5.43136e-18	0.941733	4.9182	8.73444e-07	6.3727e-06	1.05787	4.61125	4.00252e-06	3.8149e-05
Hrh3	1.27433	8.83942	9.62209e-19	8.23187e-18	1.7666	9.79372	1.19807e-22	3.87341e-21	1.71541	8.98066	2.69142e-19	9.29728e-18
Mfhas1	1.35131	8.83532	9.98117e-19	8.51979e-18	1.2521	5.86018	4.62354e-09	4.51652e-08	0.950909	3.75419	0.000173904	0.00120015
Sox4	1.59307	8.78675	1.53944e-18	1.3052e-17	0.800355	4.03523	5.45496e-05	0.000299078	0.402666	1.89581	0.0579855	0.152398
Rhobtb2	1.24871	8.72883	2.57324e-18	2.15497e-17	0.757863	4.40571	1.05436e-05	6.58207e-05	0.615898	3.44331	0.000574636	0.00343491
Slc45a4	1.58477	8.699	3.34817e-18	2.78713e-17	1.90993	7.68837	1.49019e-14	2.53081e-13	1.08532	3.60885	0.000307562	0.00199691
Lrp3	1.18665	8.67408	4.16893e-18	3.44569e-17	1.51737	7.81553	5.47317e-15	9.61967e-14	1.47326	6.95069	3.63498e-12	7.02557e-11
Stk35	1.92748	8.66581	4.48296e-18	3.70322e-17	0.666129	2.91959	0.00350491	0.0124102	0.808452	2.906	0.00366082	0.0168551
Wdr4	1.96355	8.6447	5.3945e-18	4.44165e-17	0.936093	3.81186	0.000137927	0.000693373	0.7929	2.83493	0.00458355	0.0203325
Calm3	0.904858	8.63307	5.97258e-18	4.90693e-17	1.48799	9.56684	1.10224e-21	3.30577e-20	1.69568	14.3708	7.89577e-47	1.93601e-44
Celf2	1.07721	8.61105	7.23919e-18	5.9122e-17	1.52242	8.98571	2.5706e-19	6.32377e-18	1.59176	11.4821	1.62329e-30	1.27668e-28
Itpka	0.909528	8.59054	8.65611e-18	7.04655e-17	1.96532	10.6734	1.35562e-26	5.53878e-25	2.22461	13.2891	2.67614e-40	4.29041e-38
Hdac6	1.55895	8.5869	8.93511e-18	7.26585e-17	1.27414	6.10899	1.00261e-09	1.04843e-08	0.444225	2.0786	0.0376545	0.110352
Tet3	1.48452	8.57511	9.8994e-18	8.0327e-17	0.703624	3.00932	0.00261832	0.00958146	0.300197	1.07485	0.282443	0.466203
Gm5088	3.21328	8.55676	1.16089e-17	9.33961e-17	1.66262	4.83406	1.33776e-06	9.49025e-06	1.86009	3.73871	0.00018497	0.00126673
Npdc1	0.931009	8.50758	1.77609e-17	1.41834e-16	1.61554	9.24722	2.30408e-20	6.19815e-19	1.99374	11.8484	2.1931e-32	2.0018e-30
Pde8b	1.29499	8.50732	1.78005e-17	1.42e-16	0.962712	5.70639	1.15395e-08	1.07014e-07	1.03788	4.98797	6.10161e-07	6.46068e-06
Zc3h4	1.48994	8.47415	2.36805e-17	1.87325e-16	1.21271	5.77866	7.52966e-09	7.13773e-08	0.479145	1.90511	0.0567661	0.15014
Mon1a	1.5876	8.45801	2.7197e-17	2.14469e-16	1.66623	7.00596	2.45299e-12	3.34404e-11	1.59788	5.4499	5.03974e-08	6.26461e-07
Fam98c	1.72736	8.41939	3.78456e-17	2.96893e-16	1.28339	4.99001	6.03767e-07	4.51257e-06	1.53736	5.1566	2.5148e-07	2.83567e-06
Trappc10	1.2229	8.40686	4.21127e-17	3.29342e-16	1.15645	6.49874	8.09966e-11	9.52234e-10	0.835239	4.39841	1.09045e-05	9.54034e-05
Kiss1r	3.84908	8.40417	4.30904e-17	3.36814e-16	1.26123	3.53668	0.000405192	0.00182421	2.32079	3.51027	0.000447653	0.00277674
Dennd1a	1.25874	8.40221	4.3816e-17	3.42308e-16	0.683044	3.84576	0.000120179	0.000614454	0.220008	1.182	0.237204	0.415906
Mark4	1.17465	8.39762	4.55609e-17	3.55389e-16	1.41418	6.74699	1.50939e-11	1.90308e-10	1.46552	6.70975	1.94964e-11	3.51807e-10
Ulk2	1.20861	8.39451	4.67839e-17	3.64365e-16	0.86395	5.53756	3.06709e-08	2.72253e-07	0.95499	3.76331	0.000167681	0.00116218
Vsig2	2.56958	8.38487	5.07837e-17	3.945e-16	1.63914	5.52411	3.31156e-08	2.92846e-07	2.34253	5.25131	1.51022e-07	1.76828e-06
Dnal1	1.15638	8.38014	5.28627e-17	4.10229e-16	1.3188	7.59205	3.14877e-14	5.14909e-13	1.66376	8.82146	1.1298e-18	3.66964e-17
Ppp1r3f	1.56221	8.37818	5.37506e-17	4.16691e-16	1.42484	6.52091	6.98816e-11	8.25693e-10	1.58515	5.52772	3.24427e-08	4.1289e-07
Atg7	1.50062	8.35637	6.46772e-17	4.98585e-16	0.782443	3.84781	0.00011918	0.000610007	0.206641	0.986741	0.323769	0.511075
Tbc1d5	1.52743	8.35514	6.53544e-17	5.03549e-16	1.34031	6.62399	3.49636e-11	4.25602e-10	0.607195	2.28494	0.0223163	0.0729392
Fam163b	1.5276	8.30785	9.74516e-17	7.45534e-16	0.4769	2.71664	0.0065949	0.0213019	1.70103	5.09782	3.43592e-07	3.80231e-06
Mypop	1.37485	8.29624	1.07462e-16	8.20457e-16	1.33654	6.53112	6.52814e-11	7.73933e-10	2.06272	6.3912	1.64593e-10	2.74066e-09
Ttc23	2.60454	8.28221	1.20913e-16	9.20828e-16	0.771559	2.69888	0.00695725	0.0223096	0.879132	2.12331	0.0337276	0.100852
Arhgap44	1.04647	8.27955	1.23646e-16	9.40216e-16	1.94687	10.8555	1.87749e-27	8.14311e-26	2.02292	8.96506	3.10121e-19	1.0654e-17
Ncor1	0.962096	8.273	1.30627e-16	9.92307e-16	0.991342	7.52282	5.36074e-14	8.55775e-13	1.15949	8.64774	5.25293e-18	1.60214e-16
Dzank1	1.23107	8.24413	1.66367e-16	1.25811e-15	1.3525	7.62566	2.42795e-14	4.01695e-13	1.09105	3.70857	0.000208432	0.00140813
Nr2c2	1.49282	8.22527	1.9475e-16	1.46835e-15	1.32155	6.91886	4.55294e-12	6.04315e-11	1.13674	3.53084	0.000414236	0.00260302
Pik3cd	1.68219	8.21647	2.09579e-16	1.577e-15	1.36105	5.72691	1.02277e-08	9.54762e-08	0.874561	3.20168	0.00136629	0.00731396
Pgls	1.74601	8.21187	2.17767e-16	1.63699e-15	0.755179	3.11286	0.00185285	0.00707989	0.187683	0.75833	0.448253	0.629245
Flywch1	0.889075	8.18438	2.737e-16	2.04625e-15	1.82846	11.927	8.55894e-33	5.26842e-31	1.58766	12.4656	1.14997e-35	1.38273e-33
Fam160a2	1.14646	8.15775	3.41337e-16	2.54062e-15	1.81473	8.91613	4.82874e-19	1.15562e-17	1.0204	5.63861	1.71431e-08	2.24476e-07
Evi5l	1.62247	8.15691	3.43701e-16	2.55569e-15	0.826371	3.1801	0.00147223	0.00577585	0.465329	1.77283	0.0762563	0.185957
Cpeb2	1.47451	8.15355	3.53393e-16	2.62438e-15	1.19039	6.31983	2.61846e-10	2.94102e-09	0.931967	3.10696	0.00189025	0.00959317
Bahd1	1.15646	8.11361	4.91385e-16	3.62354e-15	1.9768	10.5013	8.51987e-26	3.36404e-24	1.45891	5.73776	9.59351e-09	1.31687e-07
Ogdh	0.982914	8.11334	4.92471e-16	3.62978e-15	0.837446	5.19413	2.05677e-07	1.63244e-06	0.105897	0.606079	0.544462	0.70709
Scap	1.02463	8.09553	5.70145e-16	4.18596e-15	1.22965	6.94016	3.91649e-12	5.2478e-11	0.989418	5.23583	1.64245e-07	1.91237e-06
Mta1	1.26178	8.0916	5.88872e-16	4.32135e-15	0.804569	4.29536	1.74414e-05	0.000104797	0.425887	2.35299	0.0186229	0.0633859
1700001O22Rik	2.95081	8.08667	6.13178e-16	4.49753e-15	1.44089	4.06515	4.80017e-05	0.000265658	2.54091	4.12489	3.70907e-05	0.000295992
Atp2b2	0.8526	8.08606	6.16261e-16	4.51795e-15	1.87762	11.4965	1.374e-30	7.19996e-29	1.64702	6.52166	6.95329e-11	1.19932e-09
Ago2	1.31038	8.06767	7.16501e-16	5.22748e-15	1.58389	7.37247	1.6749e-13	2.56623e-12	0.449069	1.54047	0.123446	0.262221
Grik4	1.36033	8.04124	8.89303e-16	6.44777e-15	1.73301	8.2145	2.13058e-16	4.24791e-15	1.54476	6.2112	5.25829e-10	8.34453e-09
Kcnn1	1.70444	8.01159	1.13232e-15	8.16277e-15	1.26404	5.12729	2.93939e-07	2.28789e-06	1.91866	5.40467	6.49268e-08	7.9599e-07
Znhit2	1.39169	8.01109	1.13695e-15	8.18831e-15	0.831964	3.53162	0.000413017	0.00185588	1.82267	6.1731	6.69635e-10	1.04481e-08
Rxrb	1.10553	7.99834	1.26106e-15	9.07786e-15	1.35039	7.53189	5.00126e-14	8.01112e-13	1.48702	7.06461	1.61062e-12	3.19695e-11
Pcnt	1.49342	7.95392	1.80698e-15	1.28971e-14	1.31649	5.8326	5.45696e-09	5.27219e-08	1.17375	3.82605	0.000130214	0.000925185
Emc1	0.964889	7.94641	1.91989e-15	1.36772e-14	1.40679	8.60291	7.772e-18	1.75006e-16	0.313226	1.57754	0.114672	0.24908
Mex3d	2.01231	7.88413	3.16743e-15	2.23018e-14	0.820079	3.04759	0.00230684	0.0085979	1.17549	3.26032	0.00111286	0.00612246
Nnt	1.6366	7.86801	3.60338e-15	2.53006e-14	0.686257	3.19369	0.00140466	0.00553076	0.230325	0.786662	0.43148	0.615451
Diaph1	1.23272	7.81939	5.30799e-15	3.69603e-14	0.765973	3.88615	0.000101847	0.000528584	1.24896	5.43288	5.54511e-08	6.85871e-07
Slc17a7	0.744262	7.81352	5.56139e-15	3.86506e-14	2.03838	13.222	6.55067e-40	6.69118e-38	1.94848	13.7981	2.61527e-43	4.95514e-41
Setd1b	1.162	7.80671	5.87003e-15	4.07238e-14	1.07087	6.03914	1.5494e-09	1.58149e-08	0.671408	2.59904	0.00934849	0.0367948
Grm2	2.30987	7.78604	6.91411e-15	4.77699e-14	1.98548	7.03928	1.93232e-12	2.67039e-11	1.70319	3.86136	0.000112756	0.000816455
Wdr6	1.00292	7.77613	7.47743e-15	5.15912e-14	1.55054	9.19545	3.73445e-20	9.78454e-19	0.229619	1.35468	0.17552	0.336122
Sdcbp2	3.35158	7.77012	7.84092e-15	5.40498e-14	2.5777	5.65277	1.57884e-08	1.44609e-07	2.31713	3.42887	0.000606096	0.00359887
Pdgfa	1.46901	7.76755	8.00196e-15	5.50595e-14	0.532235	2.49054	0.012755	0.0372555	0.521626	1.95053	0.0511136	0.13883
Map2k2	1.12029	7.75997	8.49518e-15	5.83205e-14	0.478392	2.8345	0.00458974	0.0156386	0.620653	3.20694	0.00134155	0.00720312
Wdr18	1.14418	7.75884	8.57074e-15	5.87858e-14	1.49781	8.1259	4.44043e-16	8.53919e-15	0.669367	3.42471	0.000615446	0.00364747
Pdxp	0.87634	7.75197	9.04766e-15	6.20288e-14	1.3779	7.98879	1.36272e-15	2.51426e-14	1.72332	8.71237	2.97585e-18	9.32357e-17
Crb2	2.8496	7.69129	1.45661e-14	9.89201e-14	2.16343	5.2911	1.21584e-07	1.00108e-06	1.70605	3.13434	0.00172241	0.00887831
Saraf	0.893112	7.6684	1.74153e-14	1.17899e-13	0.91296	6.03608	1.57907e-09	1.6106e-08	0.586026	4.91094	9.06427e-07	9.37541e-06
Arhgap39	0.973285	7.65811	1.88682e-14	1.2762e-13	1.96635	9.42606	4.25781e-21	1.21494e-19	1.59636	7.64723	2.05348e-14	4.68591e-13
Fbxw4	1.49674	7.64764	2.04699e-14	1.38021e-13	0.94486	4.39347	1.11554e-05	6.92409e-05	1.40446	5.09447	3.4972e-07	3.86671e-06
Kif26b	3.64378	7.6312	2.32583e-14	1.56195e-13	1.38805	3.36549	0.000764075	0.00322274	0.734351	1.14285	0.253103	0.434309
Pde1b	1.13495	7.60129	2.93194e-14	1.95683e-13	1.20014	6.55713	5.48523e-11	6.56366e-10	1.04868	4.86283	1.15717e-06	1.1803e-05
Apbb1	0.841271	7.59628	3.04755e-14	2.0304e-13	1.10101	7.6407	2.16048e-14	3.60404e-13	1.37567	10.0918	6.0066e-24	2.79229e-22
Tecpr1	0.912934	7.58895	3.2251e-14	2.1468e-13	2.02608	10.9435	7.13906e-28	3.23576e-26	0.895867	3.91502	9.03983e-05	0.000668103
Sh3rf1	0.992269	7.52506	5.26966e-14	3.46655e-13	1.9665	11.3404	8.27638e-30	4.13702e-28	1.72548	7.3026	2.82251e-13	5.88259e-12
Nup214	1.34894	7.51245	5.80307e-14	3.80421e-13	1.14761	5.71148	1.11996e-08	1.04067e-07	0.424283	1.70127	0.0888927	0.207024
Mef2d	0.863126	7.48925	6.92657e-14	4.52111e-13	1.60584	9.49959	2.10727e-21	6.17548e-20	1.59272	7.17084	7.45396e-13	1.51811e-11
Rasal1	0.916042	7.48869	6.95626e-14	4.53657e-13	2.60796	13.041	7.15538e-39	7.00263e-37	1.74045	10.0145	1.31581e-23	6.0272e-22
Wdr34	1.53208	7.48039	7.41006e-14	4.82005e-13	0.735043	2.90432	0.00368057	0.0129509	0.527275	2.10426	0.0353553	0.104901
Mast1	0.917733	7.46029	8.63317e-14	5.59638e-13	1.64132	9.27613	1.75753e-20	4.7919e-19	1.21824	5.31743	1.05242e-07	1.25938e-06
Auts2	1.11774	7.45062	9.29014e-14	6.00937e-13	0.78578	4.11079	3.94302e-05	0.000221703	0.870673	4.14323	3.42446e-05	0.000274858
Ints1	1.10368	7.43459	1.04893e-13	6.76093e-13	2.05483	9.16676	4.87442e-20	1.27005e-18	0.615388	2.62028	0.00878568	0.0350334
Dtx3	1.01959	7.43455	1.04923e-13	6.76093e-13	0.843682	5.21697	1.8187e-07	1.45744e-06	0.883632	4.58973	4.43827e-06	4.18241e-05
Spata2	1.0395	7.42622	1.11748e-13	7.19153e-13	1.02118	5.92147	3.19081e-09	3.16521e-08	0.769673	3.75036	0.000176578	0.00121659
Pura	0.974222	7.39908	1.37132e-13	8.77286e-13	0.828926	5.29389	1.19741e-07	9.87055e-07	0.322219	1.97605	0.0481488	0.132738
Fam155a	0.870481	7.38453	1.52989e-13	9.76198e-13	1.33026	8.38311	5.1548e-17	1.08775e-15	1.5592	10.2462	1.23031e-24	6.154e-23
Taf4	1.83201	7.37631	1.62732e-13	1.03493e-12	0.921945	3.52523	0.000423116	0.00189582	0.874629	2.55664	0.0105689	0.0405659
Nbl1	1.01127	7.3609	1.82668e-13	1.16074e-12	0.488358	3.01145	0.0026	0.00952184	1.52251	7.6954	1.41053e-14	3.29695e-13
Proz	2.05766	7.33917	2.14923e-13	1.35941e-12	1.90341	6.07745	1.22111e-09	1.26657e-08	2.12421	4.39541	1.10564e-05	9.65505e-05
Jade2	1.10364	7.32116	2.45834e-13	1.54974e-12	1.1546	6.42749	1.29726e-10	1.49154e-09	1.18646	5.04411	4.55632e-07	4.9459e-06
Tmem259	1.02081	7.29027	3.09334e-13	1.93712e-12	0.85453	5.11615	3.11835e-07	2.4165e-06	0.560145	2.73544	0.00622977	0.026376
Ndor1	1.73452	7.28022	3.33267e-13	2.0844e-12	1.06561	4.16816	3.07072e-05	0.000176745	0.96192	3.19785	0.00138458	0.00739924
Plppr3	1.62452	7.27884	3.36694e-13	2.10409e-12	0.707787	3.06897	0.00214795	0.00806756	0.00361447	0.0145127	0.988421	0.993641
Camkk2	0.779774	7.26104	3.84136e-13	2.38676e-12	2.04434	13.6659	1.62395e-42	2.24423e-40	1.73094	11.1247	9.51263e-29	6.32741e-27
Strn4	0.787702	7.25646	3.97358e-13	2.46688e-12	1.5638	9.26053	2.0342e-20	5.50116e-19	1.60756	10.4238	1.93125e-25	1.05001e-23
Stpg1	2.03936	7.22396	5.04942e-13	3.10925e-12	1.3184	4.38272	1.17206e-05	7.23985e-05	2.45663	4.55971	5.12234e-06	4.74832e-05
Smad7	1.47061	7.21633	5.34094e-13	3.28207e-12	0.978708	4.10807	3.98987e-05	0.000224078	0.71592	2.37943	0.0173392	0.0600131
Gprin1	0.746789	7.20961	5.61137e-13	3.44126e-12	2.67039	16.0299	7.8999e-58	3.09325e-55	2.98174	15.9707	2.04351e-57	1.02216e-54
Man2c1	1.27564	7.19557	6.21997e-13	3.80216e-12	1.57015	6.88113	5.93809e-12	7.78635e-11	0.619926	2.35771	0.0183882	0.0628818
Kcnk3	1.58659	7.17727	7.11154e-13	4.34364e-12	1.06247	4.39919	1.08656e-05	6.76511e-05	0.870254	2.9444	0.00323582	0.0152234
Tmtc1	1.16363	7.17652	7.15095e-13	4.36595e-12	0.857345	3.9939	6.49956e-05	0.000350757	1.36083	5.11166	3.19337e-07	3.54017e-06
Tuba1a	0.670549	7.17634	7.16032e-13	4.36814e-12	1.08786	8.05548	7.91659e-16	1.49788e-14	0.0825529	0.819009	0.412781	0.599724
Espn	3.12659	7.1657	7.73888e-13	4.71348e-12	2.0044	4.84792	1.24763e-06	8.90909e-06	2.50328	3.5718	0.000354542	0.0022678
Elk1	1.28021	7.11628	1.10876e-12	6.69106e-12	0.890212	4.39804	1.09235e-05	6.79814e-05	1.93801	5.88244	4.04273e-09	5.79088e-08
Cpxm1	2.42763	7.0767	1.47631e-12	8.83509e-12	1.4588	4.69025	2.72865e-06	1.86895e-05	1.16557	2.81934	0.00481222	0.0211741
Myo18a	0.9152	7.06693	1.58397e-12	9.46435e-12	0.732252	4.47014	7.81676e-06	4.97899e-05	0.276592	1.05023	0.293614	0.478578
Gpaa1	1.27606	7.05794	1.68993e-12	1.00816e-11	1.39518	5.8171	5.98773e-09	5.7417e-08	0.440005	1.9379	0.052635	0.141701
Zfp574	1.40406	7.05157	1.76915e-12	1.05334e-11	1.20511	5.45297	4.95346e-08	4.28894e-07	1.51757	5.12519	2.97244e-07	3.30992e-06
Zbtb17	1.24756	7.04392	1.869e-12	1.11104e-11	1.75987	7.26634	3.69353e-13	5.49779e-12	1.7701	6.08018	1.20049e-09	1.83298e-08
Slc35e4	1.47094	7.02146	2.19569e-12	1.30319e-11	1.20809	5.32658	1.0008e-07	8.34753e-07	0.66485	2.27524	0.0228916	0.0743724
Ccdc120	2.131	6.9898	2.75287e-12	1.62496e-11	1.80915	5.37064	7.84575e-08	6.61841e-07	2.08369	3.55777	0.00037401	0.00237291
Fam189a1	0.857165	6.98271	2.89532e-12	1.70438e-11	1.72055	9.89292	4.46791e-23	1.48537e-21	1.91564	9.68032	3.65558e-22	1.57631e-20
Rnf31	1.57021	6.93834	3.96745e-12	2.31121e-11	0.808055	3.18524	0.00144636	0.00568065	0.642306	1.61455	0.106409	0.235844
Ubxn6	0.960606	6.93371	4.09948e-12	2.38536e-11	1.07158	5.97932	2.24072e-09	2.25862e-08	1.17617	6.16418	7.08498e-10	1.10059e-08
Gpr162	0.844832	6.919	4.5484e-12	2.6415e-11	1.23455	7.6209	2.51923e-14	4.1582e-13	1.37117	8.69898	3.3489e-18	1.03916e-16
Spock2	0.670051	6.90712	4.94582e-12	2.8657e-11	1.14483	7.33654	2.19187e-13	3.32937e-12	0.781859	6.46797	9.93311e-11	1.68311e-09
Rai1	0.97539	6.87496	6.2006e-12	3.5722e-11	1.89415	10.6972	1.04881e-26	4.29769e-25	1.50314	6.93488	4.06567e-12	7.82172e-11
Sema7a	0.805367	6.87323	6.27655e-12	3.6132e-11	1.91017	10.1817	2.39398e-24	8.50013e-23	1.25761	6.53693	6.2793e-11	1.09059e-09
Zfp13	1.58795	6.86524	6.63789e-12	3.8125e-11	1.16114	4.58009	4.64787e-06	3.073e-05	1.22361	3.79428	0.000148075	0.00104177
Znfx1	1.24105	6.85449	7.15678e-12	4.09962e-11	1.14885	5.20961	1.89239e-07	1.51134e-06	0.1752	0.658865	0.509982	0.679886
Cyfip2	0.741612	6.85024	7.37277e-12	4.21695e-11	2.26246	15.4306	1.01958e-53	2.99417e-51	1.86142	8.39874	4.51285e-17	1.28257e-15
Ano8	1.05509	6.84912	7.43055e-12	4.2484e-11	1.57301	8.05179	8.15949e-16	1.53971e-14	0.68697	3.18587	0.00144318	0.00763729
Gak	0.856629	6.83894	7.97797e-12	4.55622e-11	1.35604	8.17054	3.07004e-16	5.97274e-15	0.330511	2.00044	0.045453	0.127499
Umodl1	2.82668	6.82973	8.50733e-12	4.84937e-11	2.30552	4.82283	1.41534e-06	1.00104e-05	3.00532	3.85476	0.000115841	0.000833964
Atp5d	0.743841	6.8047	1.01258e-11	5.74379e-11	0.70046	4.43234	9.3215e-06	5.87901e-05	0.729713	5.1471	2.64546e-07	2.96961e-06
Asic2	1.00809	6.79826	1.05892e-11	6.00216e-11	1.24369	7.06611	1.59333e-12	2.22152e-11	1.41557	6.55724	5.48125e-11	9.54638e-10
Pisd-ps1	1.41085	6.79639	1.07271e-11	6.07576e-11	0.544292	2.54826	0.0108262	0.032421	0.339768	1.16923	0.242311	0.422432
Brpf3	1.36846	6.77695	1.22738e-11	6.92586e-11	1.0289	4.80702	1.53194e-06	1.08025e-05	1.4783	4.59107	4.40986e-06	4.16191e-05
Emx1	1.94698	6.77638	1.23223e-11	6.95063e-11	1.276	4.09777	4.17141e-05	0.000233426	1.93069	3.69083	0.00022352	0.00149792
Clec2l	1.33233	6.74676	1.51182e-11	8.48336e-11	0.530767	2.44269	0.0145783	0.0416742	1.51562	4.98884	6.07424e-07	6.44261e-06
Gabrd	1.62124	6.73044	1.69149e-11	9.46698e-11	2.03727	6.90252	5.10892e-12	6.74933e-11	0.879225	2.76592	0.00567623	0.0243253
Atp1a3	0.662609	6.72879	1.71084e-11	9.57174e-11	2.18043	13.6199	3.05052e-42	4.05662e-40	1.75444	10.2449	1.24703e-24	6.2128e-23
Kcng2	1.36777	6.72722	1.72929e-11	9.67137e-11	2.14269	7.90306	2.72135e-15	4.89288e-14	1.78618	5.39118	6.99965e-08	8.55627e-07
Srrm2	0.838267	6.71546	1.87474e-11	1.04616e-10	1.51377	9.86726	5.77207e-23	1.90546e-21	0.181007	1.02538	0.305184	0.491541
Gtpbp3	1.51784	6.71222	1.91692e-11	1.06891e-10	1.5147	5.83696	5.31608e-09	5.16084e-08	1.51505	4.37658	1.20556e-05	0.000104113
Hk1	0.667518	6.70949	1.9531e-11	1.08868e-10	1.55456	9.76065	1.6609e-22	5.32093e-21	0.657861	4.2713	1.94337e-05	0.00016212
Plppr2	0.677863	6.6772	2.43554e-11	1.34816e-10	2.08708	13.3161	1.86489e-40	1.99147e-38	1.72869	10.7642	5.08197e-27	3.08496e-25
Lrrc4b	0.703949	6.67566	2.46124e-11	1.36138e-10	0.96119	6.16178	7.19321e-10	7.68147e-09	0.749052	5.85828	4.67682e-09	6.63832e-08
Gramd1a	0.9427	6.67417	2.4864e-11	1.3748e-10	1.49829	8.16485	3.2183e-16	6.24006e-15	1.10565	4.89714	9.7241e-07	1.0033e-05
Grk6	1.06539	6.67195	2.52428e-11	1.39472e-10	0.876959	4.27382	1.92156e-05	0.000114337	1.36674	5.72593	1.02866e-08	1.40101e-07
Dalrd3	1.11332	6.65877	2.76132e-11	1.5218e-10	1.22901	5.97212	2.34188e-09	2.35625e-08	1.17226	4.40843	1.04124e-05	9.16304e-05
Slc39a3	0.900053	6.64439	3.04474e-11	1.67069e-10	1.0935	6.17678	6.54211e-10	7.01275e-09	1.12199	5.84993	4.91789e-09	6.95681e-08
Adam11	0.721681	6.63282	3.29339e-11	1.80124e-10	1.71725	10.8107	3.0635e-27	1.30462e-25	1.45274	8.01659	1.08718e-15	2.73544e-14
Apc2	0.845865	6.62162	3.5528e-11	1.93961e-10	1.09548	6.3017	2.94405e-10	3.28057e-09	0.106475	0.480707	0.630725	0.773712
Bcl11b	0.712055	6.61927	3.60973e-11	1.96856e-10	2.64363	17.5063	1.28284e-68	1.00461e-65	1.7774	10.881	1.41984e-27	8.87756e-26
Plekhh3	2.06267	6.61864	3.62521e-11	1.97628e-10	1.11311	3.56325	0.000366288	0.00166932	0.445176	1.19703	0.231296	0.408756
Ttc9b	1.06515	6.61805	3.63959e-11	1.98269e-10	0.901402	4.00428	6.22065e-05	0.000337255	2.37009	7.03626	1.9747e-12	3.90104e-11
Scrt2	1.56009	6.60624	3.94209e-11	2.13823e-10	1.06244	4.10421	4.05691e-05	0.000227561	1.45633	4.15441	3.26129e-05	0.000262098
Zfp526	1.9445	6.54934	5.77908e-11	3.10346e-10	1.23516	3.55403	0.00037938	0.00172175	1.10421	2.36169	0.0181919	0.062343
Gdf1	0.810176	6.53684	6.28334e-11	3.3635e-10	1.31317	7.69217	1.44657e-14	2.4597e-13	1.27489	6.8093	9.80756e-12	1.8305e-10
Adam15	0.907574	6.50796	7.61766e-11	4.05908e-10	0.612351	3.86636	0.000110474	0.000568543	0.00242409	0.0112533	0.991021	0.99508
Kdm4b	0.936395	6.50358	7.84308e-11	4.17185e-10	2.11011	10.2259	1.51779e-24	5.44396e-23	1.4378	7.43111	1.07694e-13	2.33399e-12
Ppp2r3d	1.90037	6.48816	8.68905e-11	4.59756e-10	0.937177	3.13166	0.00173818	0.00667796	1.28888	3.12822	0.00175866	0.00903533
Josd1	0.942053	6.47932	9.21373e-11	4.85648e-10	1.11057	5.61315	1.98676e-08	1.79522e-07	1.3274	5.36948	7.89623e-08	9.5588e-07
Clptm1	0.803039	6.47872	9.25034e-11	4.87069e-10	0.944591	5.73105	9.98117e-09	9.33607e-08	0.477638	2.9115	0.00359697	0.0166101
Sarm1	1.18974	6.47099	9.73628e-11	5.11942e-10	1.39069	6.40365	1.51703e-10	1.7329e-09	1.07794	4.49979	6.80219e-06	6.16834e-05
Ubn1	0.88247	6.46911	9.85841e-11	5.18003e-10	1.54604	8.5221	1.56681e-17	3.47261e-16	1.03569	4.97151	6.64341e-07	7.0047e-06
Add1	0.688302	6.46013	1.04616e-10	5.47417e-10	0.737478	5.06502	4.08362e-07	3.10981e-06	0.522256	3.43505	0.00059244	0.00352616
Spred3	1.14809	6.45666	1.0704e-10	5.59709e-10	0.527549	2.58707	0.00967956	0.0295715	1.27804	4.45604	8.34892e-06	7.46824e-05
Rab40c	1.21583	6.43485	1.23593e-10	6.41163e-10	0.907173	3.94158	8.09455e-05	0.000429111	1.29078	4.81601	1.46458e-06	1.47817e-05
Cactin	1.20382	6.4296	1.27939e-10	6.62575e-10	0.820132	3.6592	0.000253	0.00119915	0.623935	2.63867	0.00832327	0.0334585
Cdk14	0.823231	6.42383	1.32891e-10	6.8704e-10	0.932215	6.29549	3.06436e-10	3.40925e-09	1.12466	7.31608	2.55315e-13	5.34793e-12
Nanos1	1.31865	6.42373	1.32972e-10	6.87228e-10	0.707893	3.13533	0.0017166	0.00660766	1.36248	3.65411	0.00025808	0.00170485
Rhbdl3	1.3178	6.39479	1.60769e-10	8.25805e-10	0.660978	2.86672	0.00414748	0.0143467	1.6905	4.64019	3.48093e-06	3.35097e-05
Hcfc1	0.861253	6.38724	1.68905e-10	8.66124e-10	1.56943	9.20087	3.55059e-20	9.33753e-19	0.808127	2.6053	0.00917943	0.036211
Frs3	1.61243	6.3851	1.71288e-10	8.76858e-10	0.823922	3.275	0.00105664	0.00428491	0.755588	2.34478	0.0190382	0.0644136
Mon1b	1.09331	6.36668	1.93158e-10	9.85478e-10	0.86862	4.38677	1.15045e-05	7.12512e-05	0.723174	3.28158	0.00103228	0.00573605
Tsen34	0.999531	6.36344	1.97289e-10	1.00554e-09	0.642173	3.58553	0.00033639	0.00154203	0.25855	1.31594	0.188195	0.352249
Pold1	2.24611	6.35297	2.11192e-10	1.07206e-09	1.69896	4.55633	5.20559e-06	3.41929e-05	0.286033	0.737976	0.460529	0.639595
Ablim3	1.48397	6.33765	2.33295e-10	1.18148e-09	0.788156	3.14939	0.00163609	0.00632737	1.41625	4.16714	3.0845e-05	0.000248529
Foxj1	2.70227	6.32621	2.51255e-10	1.26819e-09	1.40095	3.42992	0.000603769	0.00261065	1.03731	2.12407	0.033664	0.100758
Fmnl1	0.736628	6.30841	2.81919e-10	1.41964e-09	1.47256	8.72993	2.5482e-18	5.89809e-17	2.09189	10.6596	1.5734e-26	9.19411e-25
Cabp1	0.926627	6.29547	3.06471e-10	1.53969e-09	1.44902	7.32466	2.3951e-13	3.61858e-12	2.23681	8.5893	8.75023e-18	2.60419e-16
2900092D14Rik	1.3493	6.29048	3.16479e-10	1.58838e-09	1.03043	4.99382	5.91968e-07	4.43143e-06	0.645397	2.28998	0.0220226	0.0722247
Rab6b	0.713294	6.27107	3.58584e-10	1.79138e-09	1.02406	6.80916	9.81673e-12	1.25569e-10	1.09528	9.09662	9.31826e-20	3.31036e-18
Inf2	0.810771	6.25835	3.89084e-10	1.93862e-09	1.29433	7.11799	1.09509e-12	1.56555e-11	1.13705	6.61424	3.73471e-11	6.56857e-10
Hdac11	0.753846	6.23505	4.51645e-10	2.23633e-09	0.896119	5.67526	1.38476e-08	1.27329e-07	0.540983	3.59934	0.000319031	0.00206495
Dsp	6.47449	6.22968	4.67376e-10	2.31271e-09	1.60472	2.85558	0.00429578	0.0148306	1.57076	2.29973	0.0214634	0.0708367
Clec16a	0.831594	6.22159	4.9214e-10	2.4281e-09	1.53291	8.8111	1.23921e-18	2.89683e-17	0.586711	3.37218	0.000745763	0.00434161
Fbrs	1.13	6.20911	5.32846e-10	2.62293e-09	0.934638	4.07952	4.51284e-05	0.000250939	0.528368	2.23482	0.0254294	0.0806889
9130221H12Rik	1.97749	6.20432	5.49354e-10	2.70155e-09	1.35915	4.01695	5.89573e-05	0.000320873	1.79049	3.46682	0.000526651	0.00318638
Xpo6	1.11449	6.20038	5.63261e-10	2.76635e-09	1.81468	9.52555	1.64175e-21	4.8618e-20	1.5113	6.38965	1.66271e-10	2.76492e-09
Vsig10l	3.18795	6.19904	5.68076e-10	2.78818e-09	1.21899	2.73183	0.00629829	0.0205273	0.624099	1.16585	0.243674	0.423861
Camkv	0.633018	6.1953	5.8173e-10	2.85057e-09	2.30989	13.9576	2.82869e-44	4.38167e-42	2.09955	11.187	4.72193e-29	3.22665e-27
Ogfr	1.0978	6.16858	6.89052e-10	3.35688e-09	0.565399	2.79572	0.00517843	0.0173508	0.366408	1.64441	0.100092	0.225698
Cyth1	1.22218	6.11766	9.49622e-10	4.57617e-09	0.960775	4.09702	4.18499e-05	0.000234094	0.861482	2.51553	0.0118852	0.0446321
Mark1	1.05182	6.10785	1.00985e-09	4.8602e-09	0.709838	3.57345	0.000352307	0.00161133	0.826651	3.45212	0.0005562	0.00334104
Prickle2	0.801036	6.10513	1.0272e-09	4.9374e-09	2.22113	13.5213	1.17124e-41	1.42326e-39	1.83516	6.78994	1.12182e-11	2.0752e-10
Foxk1	0.833288	6.1024	1.04486e-09	5.0191e-09	1.28768	6.89104	5.53853e-12	7.29636e-11	1.00236	4.8776	1.07383e-06	1.10158e-05
Tmem198	0.865229	6.0997	1.06265e-09	5.09807e-09	2.08167	9.14508	5.95865e-20	1.53552e-18	2.30204	8.80101	1.35595e-18	4.37014e-17
Pcnx3	0.98269	6.08732	1.14815e-09	5.49433e-09	1.25858	6.83376	8.27167e-12	1.0697e-10	0.479022	2.31094	0.0208364	0.0690773
Usp21	1.00455	6.07429	1.24535e-09	5.9463e-09	1.00277	4.86501	1.14451e-06	8.21856e-06	1.25292	4.42897	9.46851e-06	8.36184e-05
Mir6240	1.78914	6.07262	1.25843e-09	6.00685e-09	1.83928	6.67567	2.46111e-11	3.03251e-10	0.107252	0.102547	0.918322	0.953314
Mfsd12	1.66328	6.0615	1.34859e-09	6.423e-09	0.838874	2.91318	0.00357765	0.0126361	1.34772	3.30978	0.000933689	0.00525699
Snapc4	1.519	6.05394	1.41341e-09	6.71904e-09	1.18506	4.41408	1.0144e-05	6.34666e-05	0.77406	2.25295	0.0242625	0.0779486
Clasrp	1.48416	6.0433	1.50993e-09	7.16883e-09	0.738511	2.84376	0.00445851	0.0152727	0.405447	1.31686	0.187887	0.35208
Shf	1.08802	6.01493	1.79969e-09	8.50184e-09	1.25348	5.77729	7.59124e-09	7.19127e-08	1.72531	5.8351	5.37574e-09	7.57023e-08
Atmin	1.02189	5.99873	1.98869e-09	9.36249e-09	1.08578	5.48692	4.09002e-08	3.57427e-07	1.51965	6.26667	3.68859e-10	5.95941e-09
Fosl2	1.11651	5.99521	2.03217e-09	9.56127e-09	1.60659	7.2974	2.93382e-13	4.40417e-12	1.69587	5.61147	2.00616e-08	2.61324e-07
Top3b	1.29231	5.93237	2.98589e-09	1.39142e-08	1.25471	5.09646	3.46069e-07	2.66132e-06	0.491625	1.86055	0.0628081	0.161045
Mzf1	1.6152	5.91853	3.24825e-09	1.50949e-08	1.10219	3.54536	0.000392074	0.00177175	1.52614	3.27761	0.0010469	0.00580811
Fam171a2	0.702669	5.89985	3.6383e-09	1.68402e-08	1.98934	10.0446	9.70627e-24	3.37826e-22	1.49641	6.38153	1.75328e-10	2.90394e-09
Rbfox3	0.63456	5.89356	3.77966e-09	1.74785e-08	1.72928	11.4387	2.67787e-30	1.37764e-28	2.45417	12.3397	5.53375e-35	5.96548e-33
Mir1900	5.20593	5.87821	4.14716e-09	1.91311e-08	1.80513	2.91061	0.00360719	0.0127308	3.08651	2.78935	0.00528143	0.0228054
Irs2	1.15888	5.87582	4.20756e-09	1.9392e-08	2.07601	7.12062	1.07445e-12	1.5376e-11	0.91354	2.71797	0.00656831	0.0275996
Adcy2	0.657602	5.86724	4.43106e-09	2.03662e-08	0.725714	4.5027	6.70967e-06	4.31673e-05	0.481803	2.85361	0.00432254	0.0193601
Dcaf5	0.880678	5.85494	4.7717e-09	2.18564e-08	0.910033	5.293	1.20323e-07	9.91276e-07	0.828395	4.17892	2.92901e-05	0.00023707
Fgd1	1.55416	5.85	4.91586e-09	2.2485e-08	0.712552	2.44959	0.0143019	0.0409754	1.13864	2.58726	0.00967435	0.0378173
Dnah1	1.70624	5.83682	5.32056e-09	2.42554e-08	1.97171	5.58824	2.29382e-08	2.06209e-07	0.88708	2.16241	0.030587	0.0934269
Pgbd5	0.661031	5.83488	5.38285e-09	2.45246e-08	1.40501	8.20491	2.30764e-16	4.56861e-15	1.23342	7.71838	1.17814e-14	2.7745e-13
Arhgap27	1.45299	5.82911	5.57225e-09	2.53646e-08	0.997481	3.55352	0.000380112	0.00172451	1.26917	3.37415	0.000740437	0.00432066
Prr7	0.932196	5.82688	5.64721e-09	2.56903e-08	2.04402	9.03617	1.62258e-19	4.04097e-18	2.06346	7.9989	1.25534e-15	3.13334e-14
Add2	0.676889	5.82665	5.65498e-09	2.57102e-08	2.26626	13.9988	1.58543e-44	2.48313e-42	1.76517	6.88177	5.91128e-12	1.12171e-10
Cpt1c	0.725834	5.80858	6.30037e-09	2.84902e-08	2.14359	12.7113	5.12062e-37	4.36117e-35	1.73851	6.87276	6.29719e-12	1.18952e-10
Vamp2	0.679982	5.79333	6.90057e-09	3.11019e-08	1.13208	7.83734	4.60195e-15	8.12896e-14	1.51174	15.3397	4.15348e-53	1.44276e-50
Nr4a2	1.06343	5.76493	8.16907e-09	3.64606e-08	1.10005	5.82554	5.69279e-09	5.48126e-08	1.27213	5.84699	5.00554e-09	7.06481e-08
Engase	1.72019	5.75537	8.64543e-09	3.85411e-08	0.844033	2.67011	0.00758266	0.0239868	0.106392	0.26295	0.792589	0.879025
Mms19	1.22903	5.74768	9.04756e-09	4.02271e-08	1.05747	4.293	1.76275e-05	0.000105645	0.13855	0.555834	0.578325	0.732546
Crebbp	0.84365	5.74383	9.25595e-09	4.10932e-08	1.36607	8.1825	2.78005e-16	5.46548e-15	0.908727	3.91359	9.09334e-05	0.000671661
Sap30bp	1.13884	5.74157	9.38015e-09	4.15591e-08	1.10628	5.03152	4.86607e-07	3.67786e-06	1.31891	4.5259	6.01384e-06	5.51792e-05
Ep400	0.84566	5.71707	1.08379e-08	4.78076e-08	1.00578	5.70279	1.17864e-08	1.09016e-07	0.661107	2.76349	0.00571873	0.0244823
Rnf208	0.752514	5.71255	1.11292e-08	4.90355e-08	1.10923	6.48187	9.05953e-11	1.05802e-09	1.91825	8.93786	3.9679e-19	1.34104e-17
Mib2	0.833162	5.69996	1.19838e-08	5.27087e-08	1.35643	7.33498	2.21757e-13	3.36479e-12	0.644329	3.41089	0.000647522	0.00381766
Zfp697	1.09615	5.69304	1.24794e-08	5.4745e-08	1.47568	5.88142	4.0676e-09	3.99004e-08	1.41439	4.58875	4.45904e-06	4.19881e-05
Slc30a2	1.70336	5.66368	1.48157e-08	6.46748e-08	2.31422	6.09932	1.06519e-09	1.11057e-08	2.11148	4.06605	4.78174e-05	0.00037419
Bcl2l1	0.80874	5.66295	1.48792e-08	6.48959e-08	0.593454	3.33897	0.000840885	0.00351516	1.05872	5.49972	3.80397e-08	4.79522e-07
Cnksr2	0.871835	5.65611	1.54844e-08	6.74576e-08	2.92533	15.3286	4.9224e-53	1.36051e-50	1.93142	3.20579	0.00134694	0.00722275
Slc9a5	1.86687	5.65347	1.57245e-08	6.84641e-08	1.5359	4.30093	1.70086e-05	0.000102284	1.61758	3.17073	0.00152056	0.00797594
Exoc3l	2.43557	5.64271	1.67391e-08	7.27348e-08	1.54508	3.54287	0.000395801	0.00178535	2.48806	3.13324	0.00172886	0.00890051
Ccdc97	0.926624	5.60788	2.04818e-08	8.85145e-08	0.540805	2.88416	0.00392461	0.0136771	1.25637	5.37336	7.72841e-08	9.38712e-07
Cdan1	1.63994	5.60113	2.12953e-08	9.19513e-08	0.767375	2.59738	0.00939369	0.0288231	0.700952	1.80009	0.0718456	0.177731
Numbl	0.646278	5.58627	2.31996e-08	9.98317e-08	1.92886	11.461	2.07023e-30	1.06893e-28	2.25475	10.7424	6.43791e-27	3.87048e-25
Trerf1	1.08804	5.58531	2.33278e-08	1.00355e-07	1.53206	6.56783	5.10538e-11	6.12472e-10	0.921488	2.87824	0.00399903	0.0181676
Ptov1	0.638681	5.56469	2.62623e-08	1.12371e-07	1.18065	7.19762	6.12743e-13	8.93198e-12	0.631596	4.37032	1.24066e-05	0.000106923
Slc12a6	0.880072	5.56141	2.67596e-08	1.14273e-07	0.840628	4.74968	2.0374e-06	1.41753e-05	0.956082	3.42295	0.000619455	0.00366775
Zfp444	1.19078	5.5562	2.75712e-08	1.17606e-07	1.09982	4.78654	1.69683e-06	1.19057e-05	0.854593	2.69812	0.00697333	0.0290386
Glyctk	1.70986	5.55328	2.8036e-08	1.19487e-07	1.7388	5.00553	5.57096e-07	4.17703e-06	2.08762	3.55985	0.00037106	0.00235779
Nckap5l	1.18175	5.51148	3.55826e-08	1.50631e-07	0.757614	3.01676	0.00255494	0.00938365	0.963751	3.14024	0.00168809	0.00872019
Neurog2	2.28409	5.49518	3.90302e-08	1.64488e-07	1.91005	4.30415	1.67631e-05	0.00010098	1.88432	3.06573	0.00217142	0.0107795
Acot8	1.47119	5.48918	4.03806e-08	1.70085e-07	0.887012	3.16088	0.00157291	0.0061231	0.270691	0.744926	0.456317	0.636076
Gpc1	0.676678	5.46279	4.68715e-08	1.95788e-07	1.18512	7.51189	5.82789e-14	9.25111e-13	1.30811	8.11451	4.87739e-16	1.28134e-14
Rpap1	1.3153	5.46134	4.72552e-08	1.97282e-07	1.06151	3.93803	8.21542e-05	0.000434865	0.613978	1.89231	0.0584502	0.153265
Upf1	0.807912	5.45581	4.87513e-08	2.03191e-07	1.0862	5.68406	1.31531e-08	1.2126e-07	0.289727	1.3533	0.175959	0.336757
Abcb8	0.901287	5.44772	5.10209e-08	2.12241e-07	1.11214	5.78222	7.37194e-09	7.00707e-08	0.0886772	0.431294	0.666255	0.798038
Kif24	1.57177	5.44762	5.10491e-08	2.123e-07	1.35226	4.33051	1.48766e-05	9.0505e-05	0.414509	1.18487	0.236069	0.414321
Atp13a1	0.964789	5.44136	5.2876e-08	2.19475e-07	1.28571	5.94828	2.70973e-09	2.70896e-08	0.0404426	0.184155	0.853892	0.915926
Zdhhc8	0.797311	5.43508	5.47724e-08	2.26972e-07	0.986203	5.38087	7.41254e-08	6.27928e-07	0.764195	3.85638	0.000115079	0.00082991
N4bp1	0.917721	5.42881	5.67308e-08	2.34766e-07	0.981268	5.08937	3.59253e-07	2.75668e-06	0.974356	4.21306	2.51935e-05	0.000205777
Diras2	0.67573	5.41904	5.99195e-08	2.4742e-07	1.38066	8.43011	3.45343e-17	7.39812e-16	1.73146	8.03442	9.40244e-16	2.37052e-14
Smim10l2a	1.26551	5.40361	6.53113e-08	2.6851e-07	0.81236	2.97806	0.00290084	0.0105062	1.3625	3.65446	0.000257726	0.00170473
Snd1	0.613173	5.36881	7.92583e-08	3.23474e-07	2.12894	11.8898	1.33713e-32	8.12424e-31	1.37096	6.41174	1.43868e-10	2.41162e-09
Pck2	0.998186	5.3635	8.16252e-08	3.32954e-07	1.64151	7.1112	1.15039e-12	1.63466e-11	0.806008	3.27362	0.00106179	0.00588029
Gtpbp1	0.844107	5.36223	8.22023e-08	3.35218e-07	1.04633	5.15202	2.57693e-07	2.01915e-06	0.971988	4.48542	7.27691e-06	6.5655e-05
Rhbdd3	1.38731	5.34299	9.14245e-08	3.71223e-07	0.812222	2.86993	0.00410566	0.014216	1.22555	2.92343	0.00346193	0.0161018
Ipo4	0.804288	5.32877	9.88813e-08	4.00319e-07	1.41412	6.81045	9.72958e-12	1.24907e-10	0.852902	3.7221	0.000197574	0.00134203
Wwp2	0.990363	5.32056	1.03448e-07	4.18357e-07	1.14902	5.309	1.10231e-07	9.13475e-07	0.305502	1.39775	0.162187	0.318808
Pcid2	1.21132	5.31642	1.0583e-07	4.2765e-07	1.17198	4.24599	2.17633e-05	0.000128573	1.57291	2.97941	0.00288803	0.0138106
Dgkd	0.816904	5.26837	1.37644e-07	5.51049e-07	1.67243	8.16643	3.17638e-16	6.16725e-15	1.18675	5.7344	9.78609e-09	1.33973e-07
Plcxd1	1.67583	5.26273	1.41931e-07	5.67609e-07	1.31742	3.66608	0.000246301	0.00117055	1.64359	3.17816	0.00148214	0.00781069
Brip1	1.61835	5.2201	1.78831e-07	7.09178e-07	1.89045	5.10299	3.34336e-07	2.57671e-06	1.97575	3.95443	7.6718e-05	0.000576537
Ube2ql1	0.568152	5.20253	1.96596e-07	7.76777e-07	1.7304	11.2987	1.33118e-29	6.60715e-28	2.46268	13.521	1.17513e-41	2.04097e-39
Nmt1	0.556545	5.20152	1.97663e-07	7.80785e-07	1.74446	10.8253	2.61299e-27	1.12295e-25	1.5804	10.3308	5.11391e-25	2.66456e-23
Wdr44	1.14615	5.19172	2.08364e-07	8.20576e-07	2.06189	8.33467	7.77166e-17	1.62536e-15	1.69228	3.7275	0.000193391	0.00131718
Irf2bp2	0.863406	5.18927	2.1112e-07	8.30686e-07	0.48692	2.61632	0.00888836	0.0275122	0.182335	0.820979	0.411658	0.598803
Tnxb	1.30419	5.18776	2.12837e-07	8.36789e-07	2.41799	6.68373	2.32931e-11	2.88017e-10	1.14997	3.0797	0.00207209	0.0103812
Fbxl17	0.771218	5.18615	2.14682e-07	8.43824e-07	0.653996	3.53598	0.000406263	0.00182844	0.756257	3.00861	0.00262443	0.0127056
Scmh1	1.06418	5.1802	2.2165e-07	8.6963e-07	0.888119	3.86678	0.00011028	0.000567959	0.649943	2.47406	0.0133587	0.0490747
Myo18b	2.64826	5.16214	2.44143e-07	9.54907e-07	1.7334	3.41251	0.000643674	0.0027637	1.28436	2.01322	0.044092	0.124547
Clip2	0.642617	5.13932	2.75738e-07	1.07431e-06	0.779321	4.63569	3.55756e-06	2.3971e-05	0.977577	5.24811	1.53667e-07	1.7959e-06
Tsr2	0.753128	5.13345	2.84479e-07	1.10666e-06	0.593148	3.341	0.000834778	0.00349067	1.36152	6.2581	3.89706e-10	6.2719e-09
Gm26391	1.97625	5.12989	2.89907e-07	1.12719e-06	3.72827	7.72277	1.13832e-14	1.95441e-13	0.258559	0.354733	0.72279	0.835968
Fem1a	0.751698	5.12895	2.91355e-07	1.13224e-06	1.15778	6.00027	1.96985e-09	1.99476e-08	0.837044	3.98576	6.7264e-05	0.000511951
Smarcal1	0.848835	5.12747	2.93654e-07	1.14088e-06	1.27332	6.93122	4.17231e-12	5.5694e-11	1.08647	4.38296	1.1708e-05	0.000101743
Gm23284	1.9763	5.1259	2.96115e-07	1.14956e-06	3.72937	7.69741	1.38853e-14	2.36672e-13	0.255819	0.350813	0.725729	0.837895
Dpp9	0.732679	5.12084	3.04176e-07	1.17782e-06	1.80083	8.17594	2.93566e-16	5.76338e-15	1.05575	4.85378	1.21133e-06	1.23252e-05
Tle3	0.768868	5.11983	3.05808e-07	1.18354e-06	1.03577	5.76002	8.41036e-09	7.92993e-08	0.608903	3.06956	0.00214373	0.0106717
Gm25212	1.97463	5.11773	3.0924e-07	1.19621e-06	3.72376	7.75148	9.08244e-15	1.57087e-13	0.259883	0.355387	0.7223	0.835786
Gas2l2	4.03148	5.11148	3.19641e-07	1.2336e-06	1.42643	2.40237	0.0162893	0.0454862	0.719165	1.08815	0.276528	0.460354
Gm25018	1.97514	5.10839	3.24919e-07	1.25269e-06	3.71683	7.68745	1.50099e-14	2.54609e-13	0.239321	0.327569	0.743238	0.849265
Plk5	3.57125	5.10681	3.27651e-07	1.26258e-06	2.5665	3.75236	0.000175176	0.00085739	1.48492	1.62542	0.104073	0.232357
Fam207a	0.972386	5.08375	3.70047e-07	1.42124e-06	0.920254	3.83112	0.000127561	0.000648196	1.09571	3.52688	0.000420484	0.00263831
Sptbn4	0.620273	5.078	3.81438e-07	1.46424e-06	1.28876	7.43079	1.07952e-13	1.67403e-12	1.59381	8.62159	6.60301e-18	1.98487e-16
Tbcd	0.967051	5.06288	4.12971e-07	1.57688e-06	0.860988	3.78537	0.00015348	0.00076339	0.362636	1.53952	0.123676	0.262398
Clec11a	1.81359	5.0618	4.15326e-07	1.58508e-06	1.32733	3.41229	0.000644204	0.00276513	1.50296	2.74718	0.00601094	0.025567
Kcnb1	0.630016	5.06019	4.18831e-07	1.59805e-06	1.63888	9.61423	6.96307e-22	2.1291e-20	1.39523	5.41476	6.13724e-08	7.54797e-07
4921518K17Rik	2.40875	5.04709	4.48594e-07	1.70644e-06	1.74808	3.52322	0.00042633	0.00190779	1.09345	1.80419	0.0712019	0.176558
Edc4	0.835555	5.04553	4.52273e-07	1.7187e-06	1.41125	6.37522	1.82696e-10	2.07017e-09	0.427918	1.82596	0.0678557	0.170732
Abhd12	0.591016	5.00405	5.61392e-07	2.11582e-06	0.442646	2.93474	0.00333822	0.0118707	0.814593	6.01396	1.81041e-09	2.70803e-08
Gls2	1.2654	5.00272	5.65256e-07	2.12932e-06	1.44889	4.70093	2.58985e-06	1.77994e-05	1.98499	4.43834	9.06552e-06	8.05144e-05
Tatdn2	0.943782	4.99721	5.81655e-07	2.18674e-06	0.685889	3.26167	0.00110758	0.00446964	0.983064	3.63747	0.000275332	0.00180358
Erc1	0.931207	4.99298	5.94548e-07	2.23354e-06	0.89626	4.34778	1.3752e-05	8.40625e-05	0.453052	2.01081	0.0443451	0.125093
Lsm11	1.1058	4.99153	5.99014e-07	2.24865e-06	1.01073	3.81855	0.000134238	0.000677972	0.994318	3.18738	0.0014357	0.00760813
Kcnc3	0.557773	4.98901	6.0688e-07	2.27648e-06	2.1688	11.9055	1.10749e-32	6.78745e-31	1.97145	7.92022	2.37098e-15	5.85951e-14
Rimbp2	0.64486	4.98886	6.07356e-07	2.2777e-06	1.40884	7.68258	1.55914e-14	2.64154e-13	1.12109	3.95616	7.61637e-05	0.000573704
Kmt2b	0.883831	4.98675	6.1402e-07	2.30041e-06	1.08321	5.47856	4.288e-08	3.72879e-07	0.622822	2.57244	0.0100983	0.0390596
Camk2b	0.457149	4.9663	6.82416e-07	2.54907e-06	2.34548	16.0128	1.04099e-57	3.96589e-55	2.13513	10.5997	2.98919e-26	1.71467e-24
Insm1	1.27663	4.96034	7.03701e-07	2.62469e-06	2.61007	7.34635	2.03691e-13	3.10299e-12	2.33469	4.70017	2.59946e-06	2.54154e-05
Wnt9a	1.57711	4.95197	7.34668e-07	2.73344e-06	1.26914	3.58204	0.000340921	0.00156077	1.73472	3.32004	0.000900032	0.00509927
Mmab	1.05525	4.93411	8.05176e-07	2.98476e-06	0.64368	2.92694	0.00342314	0.0121421	1.00345	3.50456	0.000457362	0.00283134
Sh3glb2	0.594372	4.93389	8.06063e-07	2.98731e-06	1.21784	7.56253	3.95308e-14	6.4047e-13	1.64602	9.06266	1.27308e-19	4.47188e-18
Tfe3	0.967276	4.91128	9.04838e-07	3.33539e-06	0.738153	3.3484	0.000812805	0.00340991	0.891359	3.2661	0.0010904	0.00601474
Igsf9b	2.03532	4.88657	1.02608e-06	3.75757e-06	1.17321	2.79285	0.00522454	0.0174763	0.402305	0.796972	0.425467	0.610496
Smarcd1	0.618091	4.88442	1.03734e-06	3.79605e-06	0.995579	5.59396	2.21943e-08	1.99777e-07	1.09163	5.71012	1.12894e-08	1.52455e-07
Tbl3	0.841294	4.88251	1.04745e-06	3.83025e-06	1.64496	7.2291	4.86197e-13	7.13899e-12	0.382729	1.65388	0.0981516	0.222716
Vars	0.888058	4.87487	1.08881e-06	3.97572e-06	1.22256	5.75763	8.53038e-09	8.03235e-08	0.259226	1.17257	0.240967	0.420675
Pknox1	1.31765	4.87385	1.09446e-06	3.99443e-06	0.855116	2.85938	0.00424468	0.014665	1.00961	2.67447	0.00748481	0.0307179
Ccdc106	0.943011	4.87069	1.11207e-06	4.0548e-06	1.39967	5.41521	6.12166e-08	5.23293e-07	1.78486	5.48893	4.04374e-08	5.077e-07
Unc5a	0.555819	4.86645	1.13618e-06	4.13572e-06	2.4051	14.3586	9.40551e-47	1.65725e-44	1.90991	10.2976	7.22282e-25	3.6716e-23
Fam53a	1.17486	4.86283	1.15718e-06	4.2071e-06	0.87394	3.20845	0.0013345	0.00528107	1.42462	3.44	0.000581714	0.00347556
Jmjd4	1.02659	4.8529	1.21669e-06	4.416e-06	0.923488	3.912	9.15341e-05	0.000479474	1.21754	3.20373	0.00135662	0.00727153
Igsf21	0.84246	4.84623	1.25831e-06	4.55721e-06	0.850357	4.08066	4.49076e-05	0.00024981	1.14872	4.25164	2.12211e-05	0.000175509
Lrrc7	0.834434	4.84047	1.2953e-06	4.68558e-06	2.62637	13.317	1.84468e-40	1.98493e-38	1.12724	2.72468	0.0064363	0.0271637
Mfap4	2.35219	4.83522	1.32999e-06	4.79845e-06	1.33563	2.69117	0.00712013	0.0227483	2.72705	3.01245	0.00259149	0.0125851
Jag2	1.0989	4.83345	1.34187e-06	4.83897e-06	1.15286	4.23657	2.26958e-05	0.000133634	0.482187	1.63522	0.102003	0.229127
Tub	0.644747	4.82916	1.37108e-06	4.94197e-06	0.782312	5.02331	5.07888e-07	3.82436e-06	1.32165	5.50491	3.69359e-08	4.67021e-07
B4galnt1	0.611597	4.82477	1.40167e-06	5.0426e-06	1.81013	10.4244	1.91861e-25	7.38927e-24	1.89589	7.6313	2.32406e-14	5.29368e-13
Dscam	0.706585	4.81976	1.43728e-06	5.16702e-06	1.25738	6.96223	3.34933e-12	4.5136e-11	1.15117	5.24857	1.53288e-07	1.79314e-06
Miga2	0.772408	4.80675	1.53407e-06	5.49931e-06	0.618692	3.32967	0.000869504	0.00361343	0.878552	3.93759	8.23058e-05	0.000613369
Mtus2	0.79941	4.78906	1.67561e-06	5.99675e-06	1.40508	6.89379	5.43237e-12	7.1632e-11	1.63138	6.0074	1.88523e-09	2.81659e-08
Lrrc41	0.86976	4.78763	1.68761e-06	6.03538e-06	1.18458	4.93872	7.86368e-07	5.77927e-06	0.809402	3.32682	0.000878441	0.00499768
Eif4h	0.58823	4.78687	1.69402e-06	6.05547e-06	0.874854	5.53959	3.03186e-08	2.69465e-07	1.15024	8.01012	1.14594e-15	2.87173e-14
Bhlhe22	0.687829	4.75472	1.98718e-06	7.04343e-06	1.86206	9.55487	1.23744e-21	3.67996e-20	3.04448	8.40466	4.29103e-17	1.22231e-15
Hspbp1	0.675515	4.73428	2.19834e-06	7.7491e-06	1.29899	6.34247	2.26106e-10	2.5518e-09	1.57251	7.37564	1.63553e-13	3.50812e-12
Trim41	0.813361	4.71318	2.43884e-06	8.55403e-06	0.507692	2.51239	0.0119917	0.0353704	1.07415	3.69255	0.000222014	0.00148862
Zxdb	1.14687	4.70991	2.47828e-06	8.68633e-06	1.10883	4.34689	1.38085e-05	8.4371e-05	1.33142	2.89785	0.00375734	0.0172551
Susd4	0.697195	4.69195	2.70612e-06	9.45203e-06	1.10405	5.55113	2.83824e-08	2.52894e-07	1.21289	5.90397	3.54864e-09	5.12421e-08
Lrrc20	1.05433	4.68361	2.81863e-06	9.8246e-06	1.44372	5.03588	4.75649e-07	3.60083e-06	1.48215	4.25874	2.05581e-05	0.000170703
Lrfn1	0.806926	4.67006	3.01117e-06	1.04547e-05	1.22202	5.54281	2.97659e-08	2.64887e-07	1.46484	4.56362	5.02788e-06	4.67115e-05
Uba1	0.52606	4.66835	3.03623e-06	1.05345e-05	1.23433	8.62149	6.60908e-18	1.49059e-16	0.366536	2.24235	0.0249389	0.0795157
Otub2	0.853518	4.66264	3.12179e-06	1.08164e-05	1.59768	7.33058	2.29151e-13	3.46951e-12	2.36344	7.6871	1.50503e-14	3.50474e-13
Sdk2	1.76332	4.66005	3.16129e-06	1.09382e-05	1.17421	2.88602	0.00390142	0.0136159	1.55283	2.56401	0.010347	0.0398462
Ptprn	0.444497	4.65677	3.21208e-06	1.10962e-05	2.01288	13.2429	4.96024e-40	5.14114e-38	1.69681	11.3767	5.46467e-30	3.97301e-28
Tfr2	1.78208	4.64811	3.34984e-06	1.15536e-05	1.39486	3.33379	0.000856702	0.00357069	2.43005	3.51054	0.00044719	0.00277524
Mtch1	0.440077	4.63649	3.5437e-06	1.21861e-05	0.681155	5.15841	2.49052e-07	1.95469e-06	0.619207	2.95283	0.00314874	0.0148641
Dhx37	1.25272	4.62859	3.6817e-06	1.26291e-05	0.77074	2.43651	0.0148299	0.0421881	0.576463	1.57982	0.114148	0.248291
Abca7	1.50523	4.62728	3.70503e-06	1.27033e-05	0.878485	2.64462	0.00817816	0.0256404	0.153291	0.338055	0.735322	0.844604
Eif3l	0.714627	4.62065	3.82541e-06	1.30834e-05	0.538098	2.90927	0.00362276	0.0127794	0.388668	2.02142	0.0432368	0.122714
Pbx4	1.36844	4.5847	4.54645e-06	1.54273e-05	0.932845	2.79847	0.00513451	0.0172324	2.59099	4.3446	1.39529e-05	0.000119344
Doc2g	3.77115	4.57557	4.74917e-06	1.60755e-05	1.79088	2.48982	0.0127807	0.0373149	1.75599	1.66665	0.0955843	0.218716
Tas1r1	2.48709	4.57382	4.78907e-06	1.62033e-05	1.36457	2.61321	0.0089697	0.0277031	2.1977	2.40595	0.0161306	0.0567232
Bmp1	1.12226	4.57011	4.87468e-06	1.64745e-05	0.785808	2.99777	0.00271966	0.00991115	0.206471	0.544657	0.585989	0.739211
Zfp867	1.49293	4.54641	5.45698e-06	1.83278e-05	0.999457	2.76978	0.00560949	0.0185657	0.871027	1.95816	0.0502114	0.136826
Nos1	0.598824	4.53391	5.79008e-06	1.93819e-05	1.62997	9.36481	7.61849e-21	2.13076e-19	1.26219	6.17299	6.70084e-10	1.04481e-08
Nav1	0.554471	4.5016	6.74428e-06	2.23582e-05	0.879904	5.36321	8.17569e-08	6.87616e-07	0.857714	5.12314	3.00488e-07	3.33712e-06
Caln1	0.633488	4.4971	6.88871e-06	2.2802e-05	1.69904	9.33017	1.05706e-20	2.93891e-19	1.35669	6.48957	8.60794e-11	1.46652e-09
Osbpl7	1.14713	4.46781	7.90244e-06	2.60037e-05	0.922612	3.17743	0.00148584	0.00582438	0.136539	0.420742	0.673944	0.80317
Zfp319	0.997576	4.4663	7.95844e-06	2.61652e-05	1.36214	5.12848	2.92087e-07	2.27473e-06	1.34239	3.47379	0.00051316	0.0031257
Clcn2	0.684125	4.44805	8.66543e-06	2.84093e-05	1.89668	9.29385	1.48809e-20	4.08891e-19	0.387008	1.82831	0.0675034	0.17005
Jpt1	0.615362	4.42644	9.57989e-06	3.12514e-05	1.50304	7.52038	5.46165e-14	8.70899e-13	2.39503	8.04461	8.6519e-16	2.19902e-14
Zfp668	1.1442	4.42131	9.81044e-06	3.19484e-05	1.65382	5.11961	3.06171e-07	2.37392e-06	1.60706	3.64846	0.00026382	0.00173745
Zbtb40	1.40409	4.41301	1.01941e-05	3.31194e-05	1.34359	3.61539	0.000299895	0.00139654	0.684265	1.61702	0.105875	0.235162
Vars2	1.06042	4.41173	1.02548e-05	3.33022e-05	0.993227	3.64389	0.000268549	0.00126774	0.0817167	0.272712	0.785074	0.874753
Hgs	0.693554	4.40946	1.03627e-05	3.36309e-05	0.465709	2.41372	0.0157904	0.0444274	0.705903	3.26915	0.00107872	0.00596078
Klhl26	0.662571	4.39711	1.097e-05	3.55256e-05	1.40413	7.50376	6.20111e-14	9.82145e-13	1.17289	5.79625	6.78149e-09	9.45402e-08
Srrm4	1.06444	4.38914	1.13802e-05	3.67752e-05	1.3334	4.88252	1.04737e-06	7.56725e-06	1.16243	3.06289	0.00219207	0.0108605
Wipf3	0.464266	4.38357	1.16749e-05	3.76631e-05	2.4862	16.3327	5.78073e-60	2.80983e-57	3.06613	12.1556	5.35601e-34	5.58141e-32
Stk11ip	0.969781	4.38333	1.1688e-05	3.76972e-05	1.07992	3.97903	6.91981e-05	0.000371163	0.757531	2.51084	0.0120444	0.0450942
4930404N11Rik	1.28415	4.38042	1.18449e-05	3.81628e-05	0.765577	2.38922	0.016884	0.046896	0.352531	0.912422	0.361547	0.550352
Fam193a	0.879019	4.38037	1.18478e-05	3.81638e-05	0.661701	2.9312	0.00337654	0.0120009	0.155033	0.446118	0.655512	0.790641
Klf16	0.575619	4.37534	1.21244e-05	3.9005e-05	1.65909	8.20592	2.28826e-16	4.53661e-15	1.65811	7.70884	1.26963e-14	2.98434e-13
Carmil3	0.937759	4.36509	1.27073e-05	4.07415e-05	1.74061	6.80951	9.79287e-12	1.25377e-10	0.671274	2.42599	0.0152665	0.0543586
Gpd1	0.533928	4.36221	1.28753e-05	4.12539e-05	1.0238	6.47222	9.65724e-11	1.1241e-09	1.3337	5.75234	8.80191e-09	1.21354e-07
Ccdc88c	0.738214	4.35495	1.33095e-05	4.25821e-05	1.50503	6.52771	6.67841e-11	7.89756e-10	1.28094	4.38483	1.16077e-05	0.000100942
Nptxr	0.477799	4.34506	1.39238e-05	4.44815e-05	2.16608	4.55329	5.28124e-06	3.45931e-05	1.53979	4.95338	7.29358e-07	7.63872e-06
Bend3	1.55094	4.33659	1.4471e-05	4.6103e-05	0.995991	2.62982	0.00854295	0.026636	0.417403	0.888426	0.374311	0.563337
Tmem201	0.656404	4.33598	1.45114e-05	4.62219e-05	0.741695	3.85973	0.000113511	0.000582895	0.438877	1.98582	0.0470534	0.130466
Ppp1r13b	0.609205	4.29469	1.74936e-05	5.51397e-05	0.965116	5.09088	3.56405e-07	2.7393e-06	1.26396	5.95639	2.57864e-09	3.78917e-08
Atp5a1	0.441508	4.28506	1.82693e-05	5.75248e-05	0.767098	5.76016	8.40344e-09	7.92871e-08	0.566073	4.70299	2.56384e-06	2.51063e-05
Slc35c2	0.611162	4.27567	1.90563e-05	5.98284e-05	1.05961	5.52795	3.23991e-08	2.86871e-07	1.23081	5.68301	1.32342e-08	1.76621e-07
Ap3d1	0.49285	4.25116	2.12666e-05	6.63544e-05	1.26025	8.21185	2.17798e-16	4.32406e-15	0.0116762	0.0883827	0.929573	0.960369
Trim37	0.506741	4.24763	2.16048e-05	6.73541e-05	1.29537	8.57011	1.03389e-17	2.30962e-16	1.15626	6.08735	1.14796e-09	1.75707e-08
Phc2	0.619742	4.23213	2.31486e-05	7.19001e-05	0.514908	2.87331	0.00406199	0.0140856	0.480004	2.53468	0.0112549	0.0427141
Fam205a2	1.71694	4.21183	2.5331e-05	7.82446e-05	1.22305	2.8379	0.00454114	0.0155143	1.15673	1.83727	0.0661698	0.167501
Wdr25	1.3307	4.19087	2.77889e-05	8.54179e-05	1.49661	4.02202	5.77014e-05	0.00031493	1.71525	3.27242	0.00106631	0.00590012
Nacad	0.733967	4.1828	2.87944e-05	8.83648e-05	1.0123	4.75836	1.95168e-06	1.35923e-05	0.781233	3.08454	0.00203868	0.0102343
Zbtb16	0.548768	4.18071	2.90606e-05	8.91095e-05	1.29355	7.05486	1.72772e-12	2.40177e-11	0.423554	2.22339	0.0261896	0.0825356
St3gal3	0.661774	4.16329	3.137e-05	9.56282e-05	0.63727	3.02194	0.00251163	0.00924145	1.21376	4.67341	2.9624e-06	2.87615e-05
Ptpru	0.524962	4.15558	3.24468e-05	9.87513e-05	2.18843	12.3003	9.02126e-35	6.55483e-33	1.7263	7.36328	1.79442e-13	3.82923e-12
Gnaz	0.627241	4.14731	3.36404e-05	0.000102117	1.78547	8.45598	2.7676e-17	6.00186e-16	1.22842	5.50267	3.74086e-08	4.7252e-07
Fsd1	0.777763	4.13603	3.53373e-05	0.00010701	0.909442	3.76223	0.000168405	0.000827697	0.875581	2.867	0.00414389	0.0187006
Tars2	0.849155	4.12433	3.71813e-05	0.000112369	1.28717	5.13329	2.84715e-07	2.22346e-06	0.608927	2.24525	0.024752	0.0790087
Gdap1l1	0.637816	4.10279	4.08199e-05	0.00012263	1.25503	5.70576	1.15824e-08	1.07341e-07	0.517875	2.40921	0.0159872	0.0563473
Atrip	0.893626	4.09514	4.21905e-05	0.000126371	0.994132	3.71318	0.000204668	0.000986325	1.05531	3.17018	0.00152344	0.007981
Tubgcp6	0.836825	4.07928	4.51749e-05	0.000134776	1.52029	5.20829	1.90586e-07	1.52124e-06	0.40223	1.47758	0.13952	0.284989
Epn2	0.521173	4.077	4.5621e-05	0.000136026	0.906077	5.65533	1.55546e-08	1.4256e-07	0.854443	4.56444	5.00828e-06	4.6564e-05
Ankrd17	0.493057	4.07609	4.57998e-05	0.000136532	0.673138	4.18881	2.80418e-05	0.000162465	0.798083	5.16081	2.45889e-07	2.78068e-06
Pi4ka	0.430414	4.07393	4.62259e-05	0.000137748	1.65854	11.7	1.27474e-31	7.30434e-30	0.66276	4.99012	6.03418e-07	6.411e-06
Hap1	0.593997	4.07352	4.63085e-05	0.000137967	1.14847	6.26956	3.62076e-10	3.98425e-09	0.752976	2.89692	0.00376848	0.0172994
Ablim2	0.581912	4.0493	5.13707e-05	0.00015203	0.865266	4.70795	2.5022e-06	1.7239e-05	1.28838	5.52764	3.24567e-08	4.1289e-07
Sh2b1	0.554287	4.03613	5.43408e-05	0.000160349	0.613817	3.42393	0.00061723	0.00266151	1.27863	6.17323	6.69072e-10	1.04481e-08
Chpf	0.509575	4.01624	5.91333e-05	0.000173576	1.83372	9.74941	1.85551e-22	5.89081e-21	1.53692	7.39017	1.46637e-13	3.16154e-12
Ydjc	0.892777	4.01467	5.95292e-05	0.000174637	1.83231	6.45915	1.05292e-10	1.21956e-09	1.95366	4.618	3.87453e-06	3.69855e-05
Extl3	0.485212	3.99284	6.52855e-05	0.000190673	0.44389	2.81317	0.00490555	0.0165745	0.14432	0.937346	0.34858	0.53636
Vps52	0.533121	3.98	6.8914e-05	0.000200572	0.802814	4.54808	5.41363e-06	3.53617e-05	0.484767	2.68247	0.00730803	0.0300516
Aars2	0.836593	3.9723	7.11826e-05	0.000206857	1.42476	5.0426	4.59252e-07	3.48418e-06	0.893017	2.55182	0.0107163	0.0409809
Poldip3	0.615092	3.96839	7.23608e-05	0.000209998	0.90857	4.60713	4.08262e-06	2.72613e-05	0.768555	3.96439	7.3584e-05	0.000555657
Rubcn	0.658054	3.96366	7.38095e-05	0.000213751	0.511872	2.71909	0.00654612	0.0211675	0.510369	1.93388	0.0531285	0.142732
Cry2	0.509213	3.96116	7.4586e-05	0.00021571	0.766272	4.54624	5.46138e-06	3.56405e-05	0.626693	3.36667	0.000760812	0.00441383
Mib1	0.618253	3.94293	8.04937e-05	0.000231732	0.392299	2.45823	0.0139624	0.0401826	0.369331	1.66476	0.0959615	0.219145
Mbtps1	0.587747	3.91865	8.90464e-05	0.000255489	0.619506	3.51269	0.000443596	0.00197565	0.613876	2.97798	0.00290153	0.0138593
Zmym3	0.565299	3.90895	9.26992e-05	0.000265605	1.18337	6.68022	2.38579e-11	2.94227e-10	1.0668	5.04703	4.48733e-07	4.87525e-06
Cxcr5	2.5842	3.90759	9.32207e-05	0.000266896	1.81863	2.68727	0.00720381	0.0229896	1.79022	1.84898	0.0644607	0.164339
Mapt	0.399477	3.89953	9.63808e-05	0.000275287	0.785423	5.78739	7.14891e-09	6.79966e-08	0.815326	6.67478	2.4761e-11	4.42338e-10
Ttc34	1.44877	3.89414	9.85465e-05	0.000280975	1.77441	4.08129	4.47864e-05	0.000249234	1.98879	2.54643	0.0108832	0.0415076
Stk32c	0.682595	3.89313	9.89578e-05	0.000282041	1.31879	5.8253	5.70089e-09	5.48531e-08	0.673133	2.61528	0.00891537	0.0354038
Snrk	0.504341	3.8882	0.00010099	0.000287616	0.492641	3.11113	0.00186375	0.00710807	0.0585665	0.365645	0.71463	0.830989
Sphk2	0.737263	3.88723	0.000101396	0.000288501	0.796295	3.50351	0.000459161	0.00203661	0.656418	2.45713	0.0140051	0.0508964
Arhgef28	0.595997	3.86527	0.000110965	0.000314483	1.67115	8.48854	2.09247e-17	4.56585e-16	1.09635	3.61326	0.000302374	0.00196834
Akt3	0.496612	3.84187	0.000122102	0.000344048	0.444023	2.85272	0.00433468	0.0149464	1.07434	5.51812	3.4265e-08	4.34568e-07
Eif4g1	0.455637	3.83211	0.000127049	0.000357454	0.759331	5.04291	4.58498e-07	3.48034e-06	0.740584	4.51621	6.29554e-06	5.7548e-05
Helz	0.747735	3.79444	0.000147977	0.000412648	1.22154	5.13086	2.88427e-07	2.24996e-06	0.406182	1.25011	0.211258	0.382644
Nhsl2	0.58087	3.78576	0.000153237	0.000426373	1.86056	8.21261	2.16435e-16	4.30914e-15	0.86737	3.42769	0.000608742	0.00361116
Cpeb3	0.697199	3.78373	0.000154494	0.000429792	1.04206	4.74024	2.1347e-06	1.4823e-05	0.633288	1.86897	0.0616275	0.15893
Frg2f1	1.56131	3.7774	0.000158474	0.000439891	1.15925	2.7446	0.00605839	0.0198603	1.27578	2.1614	0.0306643	0.0935945
Trappc9	0.543949	3.77549	0.000159694	0.000443117	1.40651	7.43493	1.04627e-13	1.62425e-12	0.269069	1.3944	0.163197	0.319871
Habp4	0.492569	3.77384	0.000160752	0.000445641	0.844203	5.27995	1.29222e-07	1.06025e-06	1.66009	8.26925	1.34808e-16	3.72959e-15
Sidt2	0.595053	3.76859	0.000164172	0.000454374	0.483297	2.736	0.00621903	0.0202925	0.216514	1.05835	0.289897	0.474622
Ccdc92b	0.650408	3.7581	0.000171208	0.000472894	1.72387	7.35928	1.84909e-13	2.82698e-12	2.16042	5.60927	2.03179e-08	2.64387e-07
9130019P16Rik	0.97462	3.74285	0.000181946	0.000501545	2.14351	6.17752	6.51143e-10	6.98517e-09	2.25962	4.24222	2.21323e-05	0.000182562
Plxna1	0.408514	3.73964	0.000184284	0.00050762	2.47133	13.5408	8.97678e-42	1.12979e-39	1.35273	5.81642	6.01228e-09	8.4004e-08
Slc36a1	0.598566	3.73358	0.000188779	0.00051953	1.27915	5.22276	1.76277e-07	1.41746e-06	1.1804	4.91232	9.00031e-07	9.32468e-06
Ppargc1b	0.908188	3.71945	0.000199661	0.000546986	1.18	4.06903	4.72092e-05	0.000261603	0.717336	2.09213	0.0364273	0.10746
Pcnx	0.45999	3.71794	0.000200856	0.00055006	1.22129	6.9711	3.14481e-12	4.25424e-11	0.921055	4.92942	8.24757e-07	8.59465e-06
Tecpr2	0.515351	3.70773	0.000209123	0.00057084	1.66069	8.00906	1.15593e-15	2.15245e-14	0.407296	1.81771	0.0691083	0.17288
Adgrb1	0.399882	3.70658	0.000210074	0.000572927	1.15802	8.2858	1.17315e-16	2.41061e-15	0.953827	7.67778	1.61871e-14	3.74158e-13
Ppm1h	0.602312	3.67419	0.000238605	0.000645488	0.934796	4.69257	2.69799e-06	1.84975e-05	0.384998	1.64346	0.100287	0.225921
Qars	0.67064	3.67193	0.000240725	0.000650641	0.657547	3.0074	0.00263494	0.00962979	0.658118	2.66627	0.00766981	0.0312923
Kpna6	0.567378	3.66913	0.000243377	0.000656637	1.34967	7.56958	3.74434e-14	6.08769e-13	0.606946	2.98285	0.00285578	0.0136721
Cacng8	0.433624	3.63634	0.000276542	0.000739908	2.36675	13.2486	4.5999e-40	4.83882e-38	1.78864	7.29057	3.08657e-13	6.40093e-12
Cfap410	0.778602	3.62478	0.000289209	0.000771478	0.753643	2.8479	0.00440089	0.0151305	1.1078	3.19448	0.00140083	0.0074733
Crlf1	0.893077	3.61578	0.000299439	0.000797643	1.5108	4.67159	2.98877e-06	2.03427e-05	1.33679	3.03158	0.00243279	0.0119022
Bcor	1.00498	3.60693	0.000309843	0.00082318	1.04149	3.34853	0.000812422	0.00340976	1.28673	3.46922	0.00052197	0.0031701
Tlnrd1	0.603253	3.60008	0.000318119	0.000843389	1.21557	5.37025	7.86256e-08	6.62863e-07	1.59243	5.14566	2.66584e-07	2.9898e-06
Rusc1	0.475568	3.58938	0.000331464	0.000876004	2.01942	11.5006	1.3099e-30	6.91551e-29	1.04791	6.02538	1.6871e-09	2.53572e-08
Trim71	2.20673	3.5883	0.000332839	0.00087933	2.26037	3.15843	0.0015862	0.00616971	0.639356	0.843316	0.399052	0.587558
Tcte1	1.7788	3.57256	0.00035351	0.000929392	1.28682	2.46423	0.0137306	0.0396177	2.51826	2.56904	0.0101982	0.0393729
LOC432842	1.1927	3.55178	0.000382628	0.00100159	1.22586	3.24943	0.00115638	0.00465458	1.21356	2.20812	0.027236	0.0851892
Vstm2l	0.43461	3.54882	0.000386963	0.00101196	1.29971	7.01629	2.27844e-12	3.12421e-11	1.14387	6.31648	2.67591e-10	4.37416e-09
H1fx	0.606367	3.54506	0.000392523	0.00102554	1.21764	5.85266	4.8377e-09	4.71266e-08	1.71243	5.93464	2.94491e-09	4.28709e-08
Prkce	0.382012	3.53813	0.000402972	0.00105084	1.88203	14.0166	1.23307e-44	1.95297e-42	1.92706	15.8134	2.51654e-56	1.16136e-53
Ttc17	0.771177	3.53399	0.000409336	0.00106578	1.10547	4.4313	9.36661e-06	5.90482e-05	0.315061	0.926445	0.354215	0.542846
Arvcf	0.811843	3.53337	0.000410291	0.0010679	0.661597	2.56338	0.0103657	0.031268	0.281003	0.788713	0.43028	0.614301
Hnrnpl	0.427743	3.52887	0.000417332	0.00108511	0.555123	3.67686	0.000236125	0.00112599	0.174125	1.01268	0.311215	0.497689
Arhgef11	0.527867	3.52562	0.000422491	0.0010972	1.32229	7.03368	2.01157e-12	2.77176e-11	0.378299	1.88991	0.0587696	0.153727
Klhl22	0.510069	3.52067	0.000430466	0.00111637	1.36933	6.91217	4.77292e-12	6.31728e-11	1.01469	4.9774	6.4443e-07	6.80625e-06
Cdk9	0.533303	3.50536	0.000455982	0.0011779	0.523589	2.88464	0.00391867	0.0136625	0.789238	3.64903	0.000263235	0.00173524
Ulk4	1.41384	3.50153	0.000462597	0.00119417	1.27745	2.88247	0.00394568	0.0137465	0.735392	1.24818	0.211966	0.383593
Ddx56	0.76778	3.49541	0.000473332	0.00122009	0.878049	3.03965	0.00236857	0.0087954	1.10834	3.37245	0.000745019	0.00433941
Pi4kb	0.618122	3.4904	0.000482295	0.00124036	0.917843	4.04011	5.34264e-05	0.000293606	0.197576	0.868519	0.38511	0.573925
Cc2d1a	0.645857	3.47463	0.000511556	0.00131071	0.812664	3.61541	0.000299873	0.00139654	0.747907	2.90855	0.0036311	0.0167368
Pcdh1	0.405676	3.4596	0.000540986	0.00138027	2.29046	10.3203	5.70407e-25	2.11591e-23	1.08833	4.98174	6.30157e-07	6.66113e-06
Gmeb2	0.874555	3.44462	0.000571863	0.00145389	1.01063	3.50865	0.000450392	0.00200086	1.06445	2.39513	0.0166145	0.0580185
Cpne5	0.702792	3.44012	0.000581463	0.00147607	0.933486	4.00053	6.32014e-05	0.000341729	0.640826	2.03406	0.0419453	0.120007
Abhd17c	0.56009	3.43969	0.000582375	0.00147813	0.504561	2.42115	0.0154714	0.0437047	1.05184	4.40571	1.05436e-05	9.2655e-05
Gtf3c1	0.443064	3.41399	0.000640179	0.00161455	1.25472	7.41414	1.22414e-13	1.89205e-12	0.276476	1.31612	0.188135	0.35219
Srgap3	0.368857	3.41043	0.000648595	0.00163441	0.786243	5.18665	2.14109e-07	1.6927e-06	0.603412	2.47915	0.0131696	0.0485082
Ppp2r1a	0.329217	3.37937	0.000726515	0.00181623	1.22506	8.0919	5.87395e-16	1.11891e-14	1.29994	8.63914	5.6636e-18	1.71485e-16
Lrfn3	0.651369	3.37653	0.000734052	0.00183325	1.10644	4.6648	3.08918e-06	2.09754e-05	1.43663	4.09858	4.157e-05	0.000328919
Celf5	0.371202	3.37575	0.000736156	0.0018382	1.25351	8.17309	3.00602e-16	5.86881e-15	1.72524	11.0048	3.6248e-28	2.34861e-26
Fam160b2	0.580057	3.36022	0.000778801	0.00193764	0.829662	3.84819	0.000118995	0.000609504	1.19729	4.21881	2.456e-05	0.000200996
Cds2	0.362551	3.35611	0.000790464	0.00196349	0.880053	5.43508	5.47708e-08	4.71337e-07	0.859866	5.92164	3.18752e-09	4.61876e-08
Anks1b	0.434071	3.35334	0.000798429	0.00198159	1.17627	8.27169	1.32077e-16	2.6943e-15	1.48862	8.74116	2.30732e-18	7.28614e-17
Atp6v0a1	0.339093	3.3392	0.000840211	0.0020788	1.2329	8.66425	4.54513e-18	1.03503e-16	0.757523	6.38593	1.70355e-10	2.82532e-09
Usp2	0.506945	3.33215	0.000861789	0.00212766	0.67058	3.77523	0.00015986	0.000791776	0.348813	1.68759	0.0914894	0.211591
Wwc2	0.582617	3.33006	0.00086828	0.00214229	0.862357	4.52606	6.00941e-06	3.89465e-05	0.809237	3.48811	0.000486447	0.00298441
Herc2	0.380797	3.31723	0.000909134	0.00223688	1.63084	11.0707	1.73978e-28	8.14747e-27	0.369671	2.36964	0.0178055	0.0612706
Tmem143	0.79569	3.3063	0.000945367	0.00232036	1.10948	3.83912	0.000123477	0.00062903	0.280425	0.906221	0.364819	0.554052
Kcnk12	0.908329	3.30384	0.000953709	0.0023397	1.66728	4.86582	1.13986e-06	8.1893e-06	1.94484	3.76678	0.000165368	0.00114949
Sugp2	0.494879	3.28625	0.0010153	0.00247553	1.5242	7.09132	1.32843e-12	1.88007e-11	0.782855	2.6991	0.00695281	0.028972
Fbxl15	0.86098	3.28484	0.00102041	0.00248679	1.11706	3.63656	0.000276303	0.00130086	1.61922	3.28205	0.00103056	0.00573018
Tpgs1	0.564069	3.2789	0.00104212	0.00253709	0.954248	4.51592	6.30425e-06	4.06703e-05	1.24034	4.74487	2.08642e-06	2.06905e-05
Map7d1	0.362615	3.25647	0.00112809	0.00273427	0.887392	5.57279	2.50692e-08	2.24365e-07	0.914741	6.55695	5.49203e-11	9.55186e-10
Gosr1	0.618896	3.25646	0.00112811	0.00273427	0.551403	2.53426	0.0112686	0.033525	0.98933	3.0883	0.00201307	0.0101302
Foxj2	0.632198	3.2474	0.00116463	0.00281737	0.656424	3.00781	0.00263138	0.00961929	0.756573	2.85749	0.00427006	0.0191525
Dapk3	0.538067	3.24405	0.00117845	0.00284851	1.23132	5.79314	6.9083e-09	6.57969e-08	0.730624	3.10056	0.00193155	0.00977105
Azin2	0.743251	3.24035	0.00119384	0.00288295	0.828396	3.04612	0.00231816	0.0086355	0.849749	2.42966	0.0151132	0.0539768
Dbn1	0.442177	3.23671	0.00120917	0.00291625	0.898408	5.33739	9.42946e-08	7.89297e-07	1.61638	7.18191	6.87461e-13	1.40699e-11
Eif2b5	0.553858	3.22199	0.00127302	0.00306099	0.516553	2.48424	0.0129829	0.0378191	0.497767	2.17799	0.0294065	0.0904175
Nle1	1.20154	3.21663	0.00129707	0.00311506	1.03721	2.5783	0.00992891	0.0302024	0.695084	1.17131	0.241472	0.421322
Dhx38	0.597603	3.21425	0.00130786	0.00313824	1.0591	4.56388	5.0216e-06	3.30614e-05	0.195764	0.799753	0.423854	0.609389
Spire2	0.914054	3.19378	0.00140424	0.00335194	0.957909	3.03177	0.00243128	0.00899984	2.05089	3.9064	9.36811e-05	0.000689919
Rfx1	0.727504	3.18779	0.00143367	0.0034168	0.983979	3.64353	0.00026892	0.00126907	0.855131	2.43685	0.0148159	0.0531781
Man1b1	0.474496	3.18091	0.00146814	0.00349399	0.456161	2.6431	0.00821498	0.0257273	0.78207	3.54421	0.000393789	0.00248703
Unc13a	0.348368	3.17696	0.00148826	0.00353966	2.16923	12.3786	3.41142e-35	2.57152e-33	1.06624	5.41472	6.13858e-08	7.54797e-07
Pcnx2	0.3738	3.16552	0.00154808	0.00367325	2.47009	13.8584	1.13134e-43	1.67867e-41	1.49001	6.42049	1.35834e-10	2.28615e-09
Rrp9	0.864841	3.1635	0.00155885	0.00369707	1.01493	3.22402	0.00126404	0.00503758	0.881748	2.24904	0.0245099	0.0785284
G630025P09Rik	2.75655	3.15504	0.00160476	0.00379524	2.60794	2.61883	0.00882312	0.0273282	1.051	0.929504	0.352628	0.54099
Gcn1	0.449427	3.15075	0.00162851	0.00384839	0.937179	5.1321	2.8653e-07	2.2364e-06	0.54793	2.28137	0.0225268	0.0734546
Pnpla6	0.574146	3.14813	0.00164317	0.0038788	0.810141	3.73553	0.00018732	0.000911134	0.0776129	0.265887	0.790327	0.877646
Tiam1	0.701846	3.13919	0.00169418	0.00398737	0.65474	2.74998	0.00595994	0.0195694	0.26349	0.923483	0.355756	0.544586
Sec16a	0.554558	3.12467	0.00178005	0.00417194	0.934206	4.58558	4.52722e-06	2.99745e-05	0.306546	1.39492	0.16304	0.319714
Dcaf8	0.446141	3.11816	0.00181984	0.00425793	0.481602	2.87875	0.0039926	0.0138859	0.0667265	0.397197	0.691222	0.815524
Slc9a8	0.68625	3.11323	0.0018505	0.00432432	0.684114	2.74775	0.00600063	0.0196846	0.258007	0.903604	0.366205	0.55555
Ep300	0.523054	3.10869	0.00187916	0.00438316	0.737061	3.46416	0.00053189	0.00233204	0.47329	1.64987	0.0989694	0.224002
Lrrc73	0.530797	3.09802	0.00194817	0.00453364	1.31278	6.23332	4.56649e-10	4.986e-09	1.56421	5.67313	1.40213e-08	1.86329e-07
Nr4a3	0.418289	3.09527	0.00196632	0.00457086	1.9456	9.59456	8.42719e-22	2.55462e-20	1.61247	6.06967	1.28175e-09	1.94991e-08
Ccdc177	0.61352	3.09144	0.0019919	0.00462472	1.8061	6.65289	2.87395e-11	3.53192e-10	1.65104	4.33554	1.45405e-05	0.000124023
Nefl	0.35874	3.08808	0.00201452	0.00466792	2.03258	13.6005	3.9772e-42	5.2395e-40	1.63387	7.83686	4.61951e-15	1.11735e-13
Tysnd1	0.704559	3.07728	0.00208899	0.00482421	0.782764	2.87126	0.00408843	0.0141633	0.338728	1.00704	0.313914	0.500253
Asphd1	0.593527	3.07499	0.00210507	0.0048554	0.998482	4.14581	3.3861e-05	0.000193319	1.64883	5.4984	3.8326e-08	4.8216e-07
Kalrn	0.321069	3.07213	0.00212535	0.00489994	1.92453	12.4956	7.88786e-36	6.28177e-34	1.59705	6.94425	3.80466e-12	7.34217e-11
Ddx49	0.696788	3.06678	0.00216378	0.00498474	0.741679	2.84392	0.00445618	0.0152684	0.237102	0.763134	0.445384	0.62734
Cdk13	0.535555	3.05994	0.00221384	0.00508922	1.53173	6.5486	5.80773e-11	6.92604e-10	0.621323	2.12825	0.0333167	0.0999343
Egr3	0.379436	3.04723	0.00230958	0.00529559	2.27736	11.8469	2.23343e-32	1.334e-30	2.70127	10.3501	4.18134e-25	2.19696e-23
Map4	0.322875	3.03697	0.00238966	0.00546348	1.16867	7.6603	1.85505e-14	3.11667e-13	0.979621	8.62628	6.33816e-18	1.90985e-16
Tmprss9	2.51684	3.03334	0.00241866	0.0055256	3.81657	3.28499	0.00101987	0.00414776	1.48054	1.28894	0.197418	0.364816
C2cd4c	1.3223	3.02712	0.00246897	0.00563203	1.41191	2.76682	0.00566061	0.0187094	1.06011	1.66573	0.0957682	0.218946
C2cd3	0.644043	3.01813	0.0025434	0.00578958	0.77917	3.07672	0.00209292	0.00789238	0.00230582	0.00712523	0.994315	0.996997
Dhx30	0.466579	3.01207	0.00259477	0.00589587	1.04811	5.48221	4.20056e-08	3.65952e-07	0.613874	3.1891	0.00142716	0.0075782
Prdm2	0.440437	3.0112	0.00260218	0.00590914	1.1208	6.57142	4.98364e-11	5.98886e-10	1.20113	5.53788	3.06151e-08	3.91472e-07
Cnnm1	0.393779	3.00937	0.00261788	0.00594212	1.64317	9.56496	1.12242e-21	3.35205e-20	1.39339	6.36889	1.90404e-10	3.14947e-09
Gnb2	0.333004	3.00731	0.00263569	0.0059773	0.86193	5.95813	2.55134e-09	2.55787e-08	0.0222466	0.163837	0.869859	0.925509
Abl2	0.452718	2.99821	0.00271572	0.00613839	0.883255	4.92694	8.35266e-07	6.11632e-06	0.641553	2.41763	0.0156222	0.0554356
Glyr1	0.481781	2.98266	0.00285756	0.00643206	1.39179	7.65185	1.98106e-14	3.31257e-13	0.758227	1.26753	0.204966	0.374175
Urgcp	0.436966	2.97961	0.0028862	0.00649169	1.15716	5.12133	3.03381e-07	2.35618e-06	0.470592	2.33087	0.0197602	0.0663359
Hmgxb3	0.49585	2.96871	0.00299049	0.0067083	1.35434	6.05009	1.44761e-09	1.48512e-08	1.12908	3.74296	0.000181865	0.00124957
Hsf4	1.13591	2.95608	0.00311574	0.00696754	1.4165	3.18441	0.00145052	0.0056954	1.4706	2.36699	0.0179332	0.0616423
Kif17	0.662297	2.92926	0.00339766	0.00754111	1.29004	4.26417	2.00643e-05	0.000118984	0.998752	2.83147	0.00463349	0.0205104
Ampd2	0.449824	2.90838	0.00363302	0.0080129	1.1659	5.40752	6.39049e-08	5.44292e-07	0.559045	2.52197	0.0116698	0.0439287
Actr1b	0.349476	2.90346	0.00369064	0.00812811	1.37573	8.01239	1.12501e-15	2.10599e-14	0.825799	5.00626	5.54964e-07	5.94659e-06
Tro	0.374333	2.90137	0.00371534	0.00818014	1.81029	9.84409	7.2694e-23	2.38301e-21	1.2213	4.62266	3.78853e-06	3.61922e-05
Pcdh17	0.419817	2.88251	0.00394517	0.00864586	0.741462	4.18636	2.83467e-05	0.000163962	0.352073	1.75101	0.0799445	0.192214
Kctd1	0.425324	2.8788	0.00399186	0.00874058	1.27313	7.21103	5.55288e-13	8.12808e-12	1.48947	7.07434	1.50162e-12	2.99009e-11
Nlgn2	0.288913	2.87378	0.00405594	0.0088719	1.39392	9.99779	1.55838e-23	5.30601e-22	0.84684	6.67677	2.44264e-11	4.36985e-10
Cluh	0.448421	2.87072	0.00409534	0.00894772	0.683644	3.71543	0.000202854	0.00097993	0.14646	0.782595	0.433865	0.617374
Fam168a	0.355714	2.84235	0.00447822	0.00971128	0.463306	3.26542	0.001093	0.00441714	0.465756	2.83173	0.00462968	0.0205104
Klhl3	0.738633	2.83666	0.00455888	0.00986638	1.78313	5.31551	1.06361e-07	8.8296e-07	1.04249	2.12637	0.0334725	0.100305
Fxr2	0.393262	2.83292	0.00461252	0.00997103	0.774754	4.38315	1.16976e-05	7.22881e-05	0.577631	3.34831	0.000813062	0.00466392
Cabin1	0.450522	2.83264	0.00461655	0.00997833	1.54284	7.94739	1.90479e-15	3.46899e-14	0.256933	1.0837	0.278499	0.462009
Ap1s3	0.632788	2.81731	0.00484283	0.0104197	1.21822	4.49857	6.84117e-06	4.39531e-05	0.385778	1.32718	0.184448	0.347368
Mir6236	1.96048	2.80385	0.00504956	0.0108383	1.51202	10.3306	5.12648e-25	1.92188e-23	0.349981	0.962222	0.335938	0.524
Icam5	0.270567	2.80377	0.00505088	0.0108396	2.42697	15.2208	2.5744e-52	6.72012e-50	1.86482	9.18601	4.07696e-20	1.49508e-18
Ccdc22	0.697949	2.79369	0.00521106	0.0111564	1.0706	3.66986	0.000242681	0.00115491	0.438951	1.29651	0.1948	0.361474
Klhl18	0.668742	2.77759	0.00547635	0.011688	0.779623	2.84264	0.00447417	0.0153152	0.334456	1.05083	0.293335	0.478347
Atxn2l	0.429292	2.75763	0.00582229	0.0123565	0.762131	3.63015	0.000283262	0.00132976	0.119475	0.567487	0.570384	0.726125
Lars2	1.95807	2.75261	0.00591229	0.0125197	1.55962	2.80249	0.00507101	0.017064	0.300027	0.787026	0.431267	0.615217
Senp3	0.421455	2.7518	0.00592695	0.0125469	0.741907	3.9278	8.57249e-05	0.000452407	0.786107	3.66828	0.000244186	0.00162337
Rxrg	1.06949	2.7472	0.00601061	0.0127116	1.33193	2.84624	0.00442388	0.0151956	1.33706	2.10297	0.035468	0.105167
Tsc22d2	0.533377	2.74057	0.0061332	0.0129582	1.19454	5.12438	2.98512e-07	2.32092e-06	0.908235	3.27516	0.00105602	0.0058509
Rtl6	0.403984	2.72243	0.0064804	0.0136498	1.32017	6.59458	4.26455e-11	5.14667e-10	1.55392	5.4542	4.91944e-08	6.12116e-07
Gm11127	1.97974	2.71016	0.00672517	0.0141201	1.93323	2.43995	0.0146895	0.0419241	0.119421	0.141356	0.887589	0.935702
Bicral	0.495772	2.70875	0.00675378	0.0141703	0.724477	3.51259	0.000443768	0.00197579	0.705386	2.45698	0.0140109	0.0509026
Syn1	0.308172	2.70726	0.00678403	0.0142212	1.84834	11.4999	1.32124e-30	6.94933e-29	1.7612	7.67814	1.61421e-14	3.73809e-13
Mier2	0.608159	2.68372	0.0072807	0.0151434	0.822719	3.25861	0.0011196	0.00451685	0.52003	1.7326	0.0831661	0.197554
B4galnt4	0.44577	2.66873	0.00761389	0.0157908	1.54138	6.942	3.86582e-12	5.18483e-11	0.976099	3.6185	0.000296317	0.00193294
Bptf	0.316273	2.65562	0.00791633	0.0163552	1.31097	8.39673	4.5907e-17	9.71629e-16	0.472619	2.81787	0.0048344	0.0212045
Sec22c	0.497436	2.64527	0.00816253	0.0168307	0.854828	3.50996	0.000448173	0.00199414	0.671362	2.45195	0.0142085	0.0514842
Trpc4ap	0.303169	2.63472	0.00842055	0.01732	0.923358	6.1511	7.69464e-10	8.18594e-09	0.220388	1.49346	0.135316	0.279322
Pygo2	0.443535	2.6347	0.00842127	0.01732	0.681122	3.29912	0.00096989	0.00397892	0.912496	3.51662	0.000437087	0.002722
Polrmt	0.659863	2.63246	0.00847702	0.0174089	0.676605	2.41017	0.015945	0.044764	0.042335	0.121596	0.903219	0.944619
Cramp1l	0.611218	2.61307	0.00897337	0.0183535	0.793992	2.73432	0.0062509	0.0203823	0.541888	1.78043	0.0750049	0.183754
2020-09-09	0.311345	2.61286	0.00897891	0.0183598	1.4843	8.89582	5.7988e-19	1.38308e-17	1.00577	5.77115	7.8732e-09	1.0891e-07
Sult4a1	0.266714	2.59344	0.00950206	0.0193302	1.4594	9.73389	2.16163e-22	6.81664e-21	1.34826	8.7774	1.67304e-18	5.37824e-17
Fam189b	0.479084	2.59164	0.009552	0.0194187	1.75832	7.15136	8.59244e-13	1.2397e-11	0.681738	2.1201	0.0339973	0.101465
Atcay	0.295053	2.56952	0.0101839	0.0205789	1.11578	6.84227	7.79475e-12	1.01267e-10	1.40495	7.4112	1.25158e-13	2.7031e-12
Usp20	0.420337	2.5685	0.0102141	0.0206342	1.65325	7.30612	2.74964e-13	4.14091e-12	0.939802	2.85066	0.00436291	0.019499
Celsr3	0.501004	2.56835	0.0102183	0.0206373	1.13448	4.70172	2.57984e-06	1.77392e-05	0.947226	2.81527	0.00487366	0.0213468
Ggt7	0.336152	2.56423	0.0103406	0.0208592	1.79151	9.91064	3.74243e-23	1.25603e-21	0.85105	4.25674	2.07429e-05	0.000172009
Trrap	0.360223	2.55017	0.0107671	0.0216329	0.978818	5.57946	2.41272e-08	2.16346e-07	0.222703	0.944378	0.344977	0.532782
Ddx23	0.382658	2.54583	0.0109017	0.0218657	0.679514	3.68919	0.000224965	0.00107774	0.281465	1.34541	0.178494	0.339899
Nckipsd	0.405794	2.54018	0.0110795	0.0221723	0.86262	4.41486	1.01076e-05	6.32947e-05	1.13659	3.63963	0.00027303	0.00179131
Map3k12	0.339778	2.53143	0.0113598	0.02267	1.02101	5.81805	5.95397e-09	5.71322e-08	0.683849	3.12361	0.00178646	0.0091481
Pde2a	0.260722	2.5295	0.0114226	0.0227834	1.75426	11.5498	7.39757e-31	4.03422e-29	1.65498	10.6363	2.019e-26	1.16348e-24
Thbd	0.556618	2.50726	0.0121673	0.0241477	1.26177	4.60615	4.10196e-06	2.73775e-05	0.63221	1.92491	0.0542403	0.144962
AU040320	0.361184	2.49978	0.012427	0.024606	0.982075	5.47742	4.31564e-08	3.75051e-07	0.407277	1.788	0.0737753	0.181463
Sik3	0.283891	2.49977	0.0124275	0.024606	1.16988	7.72418	1.1258e-14	1.93528e-13	0.292295	1.83645	0.0662905	0.16767
Grm4	0.835733	2.48382	0.0129983	0.0256487	1.07726	2.70532	0.00682389	0.0219411	1.17656	2.02335	0.0430369	0.122202
Capn10	0.562119	2.47338	0.0133841	0.026331	0.63697	2.37585	0.0175085	0.0483257	0.88931	2.63883	0.00831938	0.0334585
Fkbp5	0.387774	2.46726	0.0136152	0.026737	1.17391	5.88314	4.02553e-09	3.95153e-08	1.89209	5.90256	3.57913e-09	5.16229e-08
Hspa1l	0.83085	2.46224	0.0138072	0.0270858	1.13698	2.92923	0.00339808	0.0120653	1.04749	1.90336	0.0569939	0.150612
Lrfn4	0.470416	2.45181	0.0142141	0.027801	1.28932	5.61948	1.91535e-08	1.73625e-07	0.902475	3.32399	0.000887401	0.00504178
Mapk8ip3	0.247571	2.4365	0.01483	0.0288527	1.1523	7.6623	1.82637e-14	3.07581e-13	0.831826	5.37328	7.73189e-08	9.38712e-07
Esrra	0.411529	2.43627	0.0148395	0.0288674	0.545331	2.37352	0.0176192	0.0485933	0.650991	2.53896	0.0111181	0.0422848
Zbtb22	0.498241	2.43457	0.0149095	0.0289887	0.756665	3.02473	0.00248854	0.00917084	1.00699	3.2998	0.000967555	0.00542082
Gps1	0.310683	2.41906	0.0155606	0.0300882	0.608068	3.72235	0.00019738	0.000956437	0.701624	3.9506	7.79544e-05	0.000585477
Zswim4	0.560605	2.41406	0.0157758	0.0304731	0.952676	3.26895	0.00107947	0.00437248	0.215335	0.708729	0.478492	0.65394
Atg13	0.351818	2.40022	0.0163852	0.0315374	0.923343	4.9058	9.30469e-07	6.7538e-06	0.556632	2.44737	0.0143901	0.0519032
Nmrk2	1.69772	2.39579	0.0165846	0.0318605	1.92768	2.38734	0.0169709	0.0470574	1.75771	1.51794	0.12903	0.270363
Nphp4	0.627405	2.38364	0.0171425	0.0328529	1.77094	5.24237	1.58525e-07	1.2835e-06	1.07936	1.98037	0.0476616	0.131831
Coro7	0.432377	2.36657	0.017954	0.0342006	1.43234	6.22175	4.91625e-10	5.34305e-09	0.265579	1.11419	0.265199	0.447028
Setd1a	0.460859	2.36656	0.0179543	0.0342006	0.805558	3.36722	0.000759295	0.00320354	0.847014	2.48168	0.0130766	0.0482083
Ripor1	0.285638	2.36218	0.0181678	0.034568	1.44613	8.49907	1.91116e-17	4.20276e-16	1.20005	6.74912	1.48742e-11	2.71535e-10
Slc26a10	1.33349	2.36107	0.0182223	0.0346369	1.85136	2.79413	0.00520394	0.0174198	3.04225	2.70698	0.00678977	0.0283967
Rcc2	0.29005	2.35763	0.0183922	0.034929	1.02039	6.15601	7.46011e-10	7.95444e-09	0.709195	4.14065	3.46318e-05	0.00027761
Mfn2	0.272021	2.35358	0.0185934	0.0352845	0.638535	3.97508	7.03547e-05	0.000376507	0.103186	0.724071	0.469022	0.646635
Per1	0.341792	2.35112	0.018717	0.0354961	1.04061	5.32584	1.00485e-07	8.37632e-07	0.647992	2.36461	0.0180491	0.0619726
D430042O09Rik	0.601538	2.34116	0.0192239	0.0363578	0.829888	2.79338	0.00521604	0.017452	0.262027	0.763755	0.445013	0.626998
Ube3c	0.348314	2.34039	0.0192637	0.0364194	1.317	7.49561	6.59925e-14	1.0382e-12	1.44007	6.01761	1.77009e-09	2.65726e-08
Dnajc11	0.374889	2.3235	0.0201523	0.0379238	0.637149	3.29093	0.00099858	0.00407763	0.608679	2.67037	0.00757675	0.0310138
Stx1a	0.337028	2.32276	0.0201923	0.0379897	1.82309	8.40993	4.10266e-17	8.70949e-16	2.10839	7.29471	2.99306e-13	6.21731e-12
Kif3c	0.266118	2.31424	0.0206546	0.0387671	1.48758	9.47214	2.74173e-21	7.96855e-20	1.08256	7.0119	2.35102e-12	4.62985e-11
Nectin1	0.382837	2.30921	0.0209319	0.039225	1.12446	5.19462	2.05134e-07	1.62905e-06	0.494957	2.12359	0.0337042	0.100831
Ttll11	0.453635	2.29171	0.0219224	0.0408885	0.753614	3.11116	0.00186353	0.00710807	1.00618	3.15502	0.00160485	0.00834486
Lzts1	0.573338	2.28468	0.0223317	0.0415954	2.12434	5.92167	3.18683e-09	3.16349e-08	1.38466	3.09774	0.00195002	0.00984227
Kcnma1	0.366429	2.27697	0.0227882	0.042357	1.6531	8.35853	6.35069e-17	1.33412e-15	1.01003	3.46692	0.000526453	0.00318638
Ranbp10	0.479976	2.27527	0.02289	0.0425097	0.762978	2.94411	0.00323883	0.0115552	0.4553	1.51868	0.128844	0.270198
Lmtk3	0.275484	2.27439	0.0229427	0.042597	2.50634	16.9558	1.74237e-64	1.16954e-61	1.22339	5.65081	1.59692e-08	2.09763e-07
Dscaml1	0.270755	2.27035	0.0231862	0.0429858	1.3918	8.02727	9.96622e-16	1.87312e-14	1.06512	4.87101	1.11029e-06	1.13618e-05
Dusp4	0.61059	2.26519	0.0235013	0.0435325	1.54463	4.46615	7.96411e-06	5.06141e-05	1.86238	3.36913	0.000754059	0.00438582
Rbm14	0.525775	2.26445	0.0235465	0.0436055	0.726693	2.63579	0.00839416	0.0262243	0.709368	1.99876	0.0456338	0.127863
Zfp653	0.539731	2.24248	0.0249304	0.0459266	1.05879	3.51634	0.000437546	0.00195241	1.21034	3.06532	0.00217438	0.0107899
Nefh	0.4096	2.23188	0.0256232	0.0470995	1.33615	5.66825	1.44267e-08	1.32395e-07	0.625907	2.29453	0.0217599	0.0715905
Dgkh	0.62205	2.23059	0.0257086	0.0472424	1.35158	3.48197	0.000497731	0.00219114	0.125084	0.268215	0.788534	0.876803
Ubfd1	0.434386	2.22916	0.0258035	0.0473964	0.722843	3.33726	0.000846086	0.00353376	0.864997	2.89285	0.00381761	0.0174933
Mgat3	0.278619	2.20954	0.027137	0.0495566	0.955329	5.82641	5.6631e-09	5.45639e-08	1.15713	5.82222	5.807e-09	8.14727e-08
Ajap1	0.349281	2.19457	0.0281945	0.0512973	1.73209	8.05301	8.07817e-16	1.52641e-14	1.79238	6.4402	1.19319e-10	2.01362e-09
Radil	0.839766	2.18263	0.0290631	0.0526479	1.3739	2.95053	0.00317225	0.0113435	0.0979344	0.199432	0.841925	0.908801
Bop1	0.382803	2.18242	0.0290789	0.0526639	1.2043	4.91249	8.9925e-07	6.54405e-06	0.721782	2.74693	0.00601568	0.0255784
Robo3	1.5099	2.17102	0.0299294	0.0539844	1.89233	2.47324	0.0133896	0.0387875	1.03983	1.12762	0.259482	0.440596
Mical2	0.226469	2.16989	0.0300151	0.0541195	2.37961	16.2165	3.85671e-59	1.75368e-56	1.97294	8.49719	1.9424e-17	5.64876e-16
Klk8	0.441769	2.149	0.0316345	0.0566307	0.642429	2.6465	0.00813296	0.0255158	1.75231	4.30595	1.6627e-05	0.000140677
Slc30a3	0.303136	2.14383	0.0320461	0.0572761	1.76593	9.81973	9.2588e-23	3.01414e-21	1.71191	7.65839	1.88273e-14	4.31348e-13
Zbtb45	0.483536	2.1429	0.0321211	0.0574034	1.3713	4.85122	1.22706e-06	8.77557e-06	0.605581	1.61354	0.106628	0.236206
Zfp579	0.61165	2.14097	0.0322767	0.0576541	0.84869	2.46429	0.0137284	0.0396177	0.937065	2.16964	0.0300344	0.0920089
Anapc2	0.298485	2.13823	0.0324981	0.0580222	0.550113	3.07814	0.00208294	0.00785898	0.0849352	0.475476	0.634448	0.776307
L3mbtl2	0.409747	2.13349	0.0328844	0.058625	1.01959	4.04954	5.13186e-05	0.000282794	0.951368	3.14693	0.00164997	0.00854009
Kcnj11	0.381506	2.09886	0.0358291	0.0632818	1.0536	4.92207	8.56326e-07	6.25753e-06	1.431	4.59325	4.364e-06	4.1311e-05
Trpm2	0.462322	2.097	0.0359936	0.0635303	1.2517	4.24843	2.1527e-05	0.000127284	0.698887	1.92924	0.0537008	0.143981
Atg9a	0.255254	2.07734	0.0377698	0.0663451	1.07051	6.34833	2.17665e-10	2.46047e-09	0.957442	5.14883	2.6212e-07	2.94767e-06
Rtl8b	0.270438	2.07294	0.0381776	0.0669681	0.487834	2.60222	0.00926231	0.0284882	1.1737	5.59628	2.19e-08	2.84382e-07
Dmtn	0.222925	2.05581	0.0398006	0.0694603	1.62629	10.5876	3.40241e-26	1.35481e-24	2.45196	12.0166	2.90789e-33	2.79716e-31
Epor	1.01646	2.05041	0.0403244	0.0703177	1.92143	3.09604	0.00196122	0.00744056	1.30829	1.66775	0.095365	0.218374
Dtnb	0.35282	2.05034	0.0403315	0.0703219	0.479668	2.41147	0.0158883	0.0446493	0.667522	2.41693	0.0156521	0.0555104
Trim28	0.260527	2.03291	0.0420614	0.0729177	1.08476	6.46339	1.02383e-10	1.18684e-09	1.05193	4.98994	6.0399e-07	6.41163e-06
Tmem214	0.388566	2.0181	0.0435806	0.0752321	0.884934	3.6408	0.000271792	0.00128133	0.842926	2.88396	0.00392703	0.0179029
Rbm10	0.37325	1.99687	0.0458388	0.0786365	0.730029	3.14926	0.00163683	0.00632825	0.306445	1.08105	0.279674	0.463161
Emc10	0.207023	1.98339	0.0473241	0.0808635	0.936741	6.5693	5.05537e-11	6.06989e-10	0.887213	6.66949	2.56695e-11	4.56611e-10
Arfip2	0.289847	1.98174	0.0475082	0.0811229	0.943476	4.863	1.15617e-06	8.29808e-06	1.27399	5.08627	3.65167e-07	4.03037e-06
Atf6b	0.264775	1.94023	0.0523521	0.0885044	1.07861	6.05803	1.37796e-09	1.41883e-08	0.661954	3.41722	0.000632642	0.00373875
Pelp1	0.3425	1.93723	0.0527175	0.0890624	1.06424	5.05086	4.39818e-07	3.34214e-06	0.650403	2.39749	0.016508	0.057695
Rabggta	0.425165	1.93662	0.0527914	0.0891474	1.30048	4.7976	1.60575e-06	1.12947e-05	0.730027	1.9287	0.0537682	0.1441
Cilp2	1.29536	1.92284	0.0545	0.0917151	2.07671	2.50863	0.0121199	0.035674	2.39729	1.97291	0.0485056	0.133398
Sec14l1	0.194858	1.90495	0.0567865	0.0951286	1.18764	7.97993	1.46416e-15	2.69085e-14	0.818265	4.42928	9.45472e-06	8.35556e-05
Mtor	0.28104	1.90334	0.0569968	0.0954598	0.956148	4.96018	7.04266e-07	5.22217e-06	0.601834	1.93923	0.0524737	0.14148
Mon2	0.291673	1.89347	0.0582959	0.0973553	0.955336	5.01064	5.42495e-07	4.07406e-06	0.203956	0.938396	0.348041	0.535888
D330041H03Rik	0.59843	1.88135	0.0599239	0.0996227	1.22736	2.82778	0.00468723	0.0159208	1.01605	1.98289	0.0473793	0.131166
Tacc2	0.30265	1.86693	0.0619109	0.102621	0.569131	2.62699	0.0086144	0.0268113	2.05981	5.69337	1.24559e-08	1.66947e-07
Rnf126	0.331303	1.83587	0.066377	0.109032	0.591748	2.68408	0.00727303	0.0231685	0.802292	2.86787	0.00413239	0.018679
Nat10	0.475991	1.82218	0.0684282	0.111975	0.841842	2.73872	0.00616792	0.0201537	0.226675	0.643311	0.520023	0.688708
Cdh4	0.461688	1.79435	0.0727574	0.118215	0.832569	2.62252	0.00872817	0.0270996	0.0175278	0.053658	0.957208	0.976495
Nmnat2	0.243143	1.77526	0.0758554	0.122603	1.15493	6.80998	9.7612e-12	1.25085e-10	0.574664	2.91872	0.00351475	0.0162906
Kctd13	0.209324	1.76153	0.0781496	0.125934	1.31234	8.53254	1.43173e-17	3.17821e-16	1.65544	8.8631	7.78204e-19	2.5475e-17
Ddx54	0.27877	1.74033	0.0818017	0.131037	0.929471	4.72248	2.32982e-06	1.60907e-05	0.802479	3.48783	0.000486964	0.00298441
Gfra2	0.402857	1.73604	0.0825573	0.132065	1.32325	5.0092	5.46566e-07	4.10026e-06	1.55444	3.40651	0.000657996	0.00387576
Med24	0.233527	1.7279	0.084007	0.134087	1.4658	8.40848	4.15351e-17	8.80418e-16	0.922475	4.83254	1.34802e-06	1.36273e-05
Eefsec	0.447755	1.72681	0.0842017	0.134355	1.1241	3.73331	0.000188979	0.000918883	0.555266	1.47454	0.140336	0.286095
Agrn	0.211889	1.71489	0.0863658	0.137315	1.31635	7.14085	9.27544e-13	1.33279e-11	0.415366	2.3901	0.0168439	0.0587212
Gabbr2	0.206006	1.71399	0.0865298	0.137561	1.77692	9.25657	2.11107e-20	5.6898e-19	1.38922	4.44133	8.94033e-06	7.95155e-05
Grin1	0.162022	1.69775	0.089554	0.14158	2.64219	16.7068	1.1698e-62	7.16936e-60	1.51429	7.26586	3.70673e-13	7.63636e-12
Lmtk2	0.2037	1.68317	0.0923426	0.145365	2.06066	11.4079	3.81647e-30	1.94917e-28	1.1721	5.12633	2.95452e-07	3.2929e-06
Exoc6b	0.22853	1.68179	0.0926093	0.145694	0.739014	4.05385	5.03821e-05	0.000278068	1.02257	5.01799	5.22159e-07	5.61445e-06
Synm	0.314153	1.66498	0.095917	0.149993	1.14016	4.60317	4.16113e-06	2.77453e-05	0.586734	1.86863	0.0616748	0.159019
Kcnt1	0.352681	1.65464	0.097997	0.152771	1.12268	4.21649	2.48137e-05	0.000145134	0.825362	1.96418	0.0495095	0.135243
Trim66	0.602904	1.64953	0.0990392	0.154205	1.00207	2.49462	0.0126091	0.0369134	0.413794	0.800479	0.423433	0.609044
Fntb	0.362116	1.64924	0.0990975	0.154264	1.1297	4.16453	3.1199e-05	0.000178991	0.619087	1.85008	0.0643023	0.164035
Trpv2	0.429605	1.64536	0.0998957	0.155315	0.943958	2.98283	0.00285592	0.0103675	0.640086	1.71728	0.0859285	0.20198
Tppp	0.197063	1.63689	0.101654	0.157789	1.00842	6.93002	4.20778e-12	5.61144e-11	1.306	7.8812	3.24247e-15	7.95041e-14
Epha10	0.320927	1.61566	0.106167	0.163835	1.94591	6.59753	4.18066e-11	5.05842e-10	0.901845	2.89011	0.00385107	0.0176143
Arhgef18	0.277602	1.59079	0.111657	0.170906	0.81057	3.47435	0.000512087	0.00225012	0.0710968	0.246163	0.805556	0.886906
Rimbp3	0.690321	1.58883	0.112098	0.171517	2.40627	3.62221	0.000292101	0.00136566	2.59983	2.74394	0.00607073	0.0257862
Ap3b2	0.191025	1.57911	0.11431	0.174161	2.08479	12.0344	2.34268e-33	1.50102e-31	0.88412	3.75457	0.00017364	0.00119965
Cacna1g	0.226824	1.57796	0.114575	0.174445	1.87394	8.70165	3.27091e-18	7.52149e-17	1.28917	5.4694	4.51567e-08	5.63557e-07
Osbpl10	0.443124	1.56075	0.118583	0.179657	1.3024	3.62345	0.000290704	0.00136139	0.972617	2.05618	0.0397656	0.115108
Relb	0.513744	1.56002	0.118756	0.179883	1.00608	2.53034	0.0113952	0.0338448	0.661586	1.30553	0.191712	0.357281
Zfp282	0.413386	1.54318	0.122788	0.185155	1.15666	3.55638	0.000375993	0.00170857	0.791001	1.86764	0.061812	0.159206
Letm1	0.207149	1.54294	0.122845	0.185204	0.676076	4.01958	5.83025e-05	0.000317677	0.285594	1.55099	0.120904	0.258695
Grid1	0.222075	1.50848	0.131431	0.196251	1.16593	6.04387	1.50464e-09	1.53914e-08	0.345257	1.75997	0.0784124	0.189771
Ppp6r2	0.21392	1.48115	0.138567	0.205164	0.671969	3.48188	0.000497899	0.00219119	0.666518	2.64381	0.00819791	0.03308
Atp2b4	0.293055	1.47769	0.13949	0.206368	1.32532	4.72438	2.30819e-06	1.5957e-05	0.883488	2.38594	0.0170355	0.059191
Unc79	0.272494	1.46927	0.141758	0.209294	1.15371	5.10663	3.27951e-07	2.53165e-06	0.738748	2.65472	0.00793741	0.0321951
Tbc1d22b	0.254472	1.44811	0.147587	0.21644	0.681041	3.15473	0.00160649	0.00622802	0.749525	2.86723	0.00414081	0.0186934
Neurod2	0.164915	1.44518	0.148407	0.217348	1.66975	9.84649	7.09791e-23	2.33767e-21	2.00957	11.5463	7.70247e-31	6.3368e-29
Ecsit	0.238061	1.40791	0.159157	0.230612	0.81922	3.56353	0.000365905	0.00166811	0.562739	2.22618	0.026002	0.0821513
Mtcl1	0.251553	1.40469	0.160113	0.231775	1.19773	4.95844	7.10598e-07	5.26358e-06	0.628105	2.05948	0.039448	0.114534
Ptprs	0.144311	1.38632	0.165651	0.238626	1.51331	10.3093	6.39437e-25	2.35339e-23	0.839071	5.1772	2.25236e-07	2.57221e-06
Chrd	0.262406	1.37135	0.170267	0.243904	1.75396	6.77264	1.26451e-11	1.60293e-10	1.02581	2.99411	0.0027525	0.0132538
Dus3l	0.266473	1.3677	0.171405	0.245279	0.997656	4.08909	4.33067e-05	0.000241859	0.467473	1.67719	0.0935053	0.215233
Usp22	0.160206	1.32771	0.184274	0.260587	1.3437	8.31097	9.49202e-17	1.96187e-15	1.10513	5.95925	2.53399e-09	3.73233e-08
Kcnip2	0.169674	1.32731	0.184405	0.260699	0.647096	3.77884	0.000157561	0.000780938	2.30368	10.0176	1.27508e-23	5.86208e-22
Rgl1	0.185432	1.30814	0.190825	0.268093	0.914008	5.01171	5.39475e-07	4.05354e-06	0.831692	4.0492	5.1392e-05	0.000399166
Fbxl6	0.320278	1.30809	0.190841	0.268093	1.11152	3.32636	0.000879868	0.00365105	0.570231	1.66685	0.0955444	0.218665
Inpp5j	0.210297	1.30352	0.192399	0.269859	1.55859	7.01938	2.22862e-12	3.05887e-11	1.62511	4.56154	5.07787e-06	4.71059e-05
Strip1	0.179793	1.30001	0.193598	0.271336	1.38244	7.5961	3.05178e-14	5.00208e-13	0.539005	2.84246	0.00447664	0.0199148
Qrich1	0.224302	1.26943	0.204289	0.283715	0.908285	4.36467	1.27315e-05	7.81634e-05	0.863938	2.31847	0.0204238	0.0681378
Pde4a	0.170524	1.2657	0.205622	0.285228	0.832935	4.87546	1.08553e-06	7.81891e-06	0.932359	4.61277	3.97333e-06	3.78997e-05
Sstr3	0.210948	1.26369	0.20634	0.2861	1.84316	6.86168	6.80554e-12	8.88249e-11	2.11406	6.63184	3.31532e-11	5.85567e-10
Smpd3	0.157743	1.26323	0.206507	0.286254	1.79998	10.3688	3.43801e-25	1.30275e-23	1.61201	5.4989	3.82174e-08	4.81278e-07
Pptc7	0.196763	1.26193	0.206972	0.286756	0.518709	2.46384	0.0137456	0.0396476	1.13619	4.23554	2.28001e-05	0.000187823
Slc25a25	0.21978	1.26065	0.207436	0.287215	1.06648	4.9323	8.12676e-07	5.96329e-06	0.741167	2.91746	0.00352892	0.0163381
Ift122	0.259274	1.25936	0.2079	0.287594	0.759599	3.043	0.00234232	0.00871631	0.00250029	0.00954319	0.992386	0.99597
Zfp689	0.464183	1.25541	0.209328	0.289226	1.08015	2.39182	0.0167649	0.0466009	0.610095	1.11237	0.265979	0.448075
Tomm20	0.151419	1.25445	0.209678	0.289655	0.56993	3.58668	0.000334911	0.00153605	1.11493	5.30703	1.11426e-07	1.32956e-06
Ptges2	0.259337	1.25077	0.211018	0.291055	0.892378	3.21775	0.00129202	0.00513601	0.244221	0.825384	0.409154	0.596047
Rps6kl1	0.219955	1.24313	0.21382	0.294275	1.5906	6.57372	4.90739e-11	5.9073e-10	1.64146	5.15033	2.60026e-07	2.92676e-06
Fam219a	0.166658	1.23925	0.215251	0.295895	0.676312	4.08273	4.45092e-05	0.000247985	0.994427	5.08267	3.72167e-07	4.1004e-06
Ly6h	0.138826	1.22603	0.220188	0.301338	1.36087	8.94325	3.77886e-19	9.16813e-18	1.69527	8.93969	3.9026e-19	1.32255e-17
Lrrc24	0.277237	1.22293	0.221356	0.30269	1.36529	4.73622	2.17737e-06	1.50896e-05	0.435853	1.43199	0.152148	0.303931
Katnb1	0.211841	1.20603	0.227805	0.310385	1.28349	5.55207	2.82301e-08	2.51696e-07	0.814308	2.92215	0.00347627	0.0161541
Cpne7	0.148042	1.19784	0.23098	0.313947	1.6602	9.15385	5.49387e-20	1.42095e-18	1.68738	9.19629	3.70506e-20	1.36672e-18
Fcsk	0.382162	1.17923	0.238307	0.322312	1.13894	2.74908	0.00597636	0.0196142	0.109466	0.24484	0.80658	0.887408
Snap91	0.133759	1.17877	0.238488	0.322529	1.32884	7.78948	6.72857e-15	1.17707e-13	1.73633	8.80924	1.25996e-18	4.07127e-17
Foxg1	0.152723	1.17638	0.239443	0.323531	1.20707	7.77817	7.35818e-15	1.28367e-13	1.41718	7.60548	2.83839e-14	6.43008e-13
Lrrc4	0.183454	1.16594	0.24364	0.32835	0.963442	4.99358	5.92693e-07	4.43215e-06	0.752214	2.98471	0.00283844	0.0135995
Bri3bp	0.157512	1.16302	0.244821	0.329456	0.67477	3.80469	0.000141984	0.000710981	0.81316	4.2611	2.03425e-05	0.00016925
Zscan2	0.430785	1.12883	0.258968	0.345375	1.12609	2.45432	0.0141153	0.0405645	2.36982	2.85731	0.00427249	0.0191565
Frat1	0.292771	1.1022	0.270373	0.357901	1.67018	4.88277	1.04605e-06	7.56156e-06	1.1654	2.68032	0.00735529	0.0302261
Col20a1	0.633719	1.09013	0.275658	0.363908	2.01816	2.77968	0.00544119	0.0180809	1.59053	1.48108	0.138586	0.283841
D830031N03Rik	0.375114	1.08992	0.275747	0.363995	1.54	3.59758	0.000321194	0.00148104	0.604887	1.11928	0.263021	0.444892
Sec31a	0.161384	1.08791	0.276634	0.364974	0.611049	3.45711	0.000545996	0.00238795	0.145255	0.789243	0.42997	0.614208
Pias4	0.274459	1.08122	0.279598	0.368113	0.806206	2.65148	0.00801389	0.0251923	0.348559	0.987755	0.323273	0.510549
Mrtfa	0.141273	1.05737	0.290341	0.378957	2.22548	10.5395	5.67869e-26	2.25484e-24	1.94188	7.51511	5.68636e-14	1.25411e-12
Cdk5	0.15305	1.05623	0.290865	0.379543	0.969462	5.11491	3.13895e-07	2.43038e-06	1.01134	4.44423	8.82068e-06	7.85072e-05
Eri3	0.135554	1.04642	0.295365	0.384288	0.64862	3.70156	0.000214275	0.00102945	0.798641	3.34269	0.000829707	0.00474633
Npcd	0.109702	1.00298	0.315871	0.406281	2.12691	14.1126	3.1759e-45	5.20552e-43	2.47837	11.5156	1.10031e-30	8.76395e-29
Dym	0.195083	0.982749	0.325731	0.4168	0.658183	2.80119	0.00509152	0.0171207	0.527239	1.7182	0.0857593	0.20181
Atp8b2	0.203058	0.974078	0.330018	0.42108	0.692309	2.66482	0.00770294	0.0243236	0.028692	0.102303	0.918516	0.953436
Arhgap21	0.142474	0.966053	0.334018	0.425244	0.442527	2.4154	0.0157179	0.0442677	0.888536	3.50053	0.000464342	0.00286604
Kcnq3	0.202805	0.957605	0.338262	0.429923	1.60806	6.31658	2.67409e-10	3.00111e-09	1.19434	2.84941	0.00438002	0.0195664
Klhl21	0.224909	0.936667	0.34893	0.441256	0.722564	2.51686	0.0118405	0.034992	0.482757	1.36257	0.173018	0.332502
Mamld1	0.22927	0.921522	0.356778	0.449676	0.987974	3.10803	0.00188341	0.00717174	1.52206	2.71663	0.00659507	0.0276656
Zfp575	0.286026	0.889277	0.373854	0.467573	1.36375	3.32975	0.000869225	0.00361343	1.86905	2.91519	0.00355477	0.0164395
N4bp3	0.233335	0.887407	0.37486	0.468649	0.928416	2.89837	0.00375111	0.0131728	0.906216	2.22366	0.0261711	0.0825356
Kcng1	0.381418	0.886848	0.375161	0.468974	1.71645	2.7881	0.00530179	0.017676	2.75943	2.73548	0.00622903	0.026376
Syn3	0.207275	0.855994	0.392001	0.486007	0.754918	2.57375	0.0100602	0.0305424	0.394115	1.0832	0.27872	0.4623
Olfm1	0.0849103	0.854556	0.392797	0.486831	0.353314	2.79731	0.00515303	0.0172863	2.14496	14.3508	1.05269e-46	2.53153e-44
Clstn2	0.117885	0.843347	0.399035	0.492666	1.40892	7.59454	3.08898e-14	5.05717e-13	0.679031	2.76381	0.00571302	0.0244662
Epg5	0.200721	0.832753	0.404984	0.498546	0.737065	2.78444	0.00536204	0.0178473	0.342246	0.831656	0.405603	0.59294
Tubgcp2	0.184687	0.823964	0.40996	0.50336	0.878642	3.17675	0.00148933	0.00583481	0.193574	0.610693	0.541403	0.704732
Trim9	0.100705	0.81236	0.416585	0.509921	0.49885	2.98108	0.0028723	0.010422	0.138303	0.760876	0.446731	0.628035
Car15	0.360969	0.809872	0.418014	0.511214	1.61126	2.71921	0.0065439	0.0211663	1.19749	1.64438	0.100098	0.225698
Smarca2	0.0984321	0.800943	0.423164	0.515968	0.732102	4.54998	5.36501e-06	3.50766e-05	0.145532	0.974388	0.329864	0.517365
Exoc8	0.142292	0.800615	0.423354	0.516117	0.848884	3.79934	0.000145083	0.000724952	0.222024	0.875824	0.381126	0.570061
Sptan1	0.0980252	0.78859	0.430351	0.52317	1.1563	7.73057	1.07067e-14	1.845e-13	1.00596	5.67215	1.41013e-08	1.87194e-07
Mdga1	0.102791	0.782343	0.434013	0.526817	1.76641	8.92077	4.63039e-19	1.11382e-17	1.46466	7.79911	6.23457e-15	1.49642e-13
Hs3st2	0.348641	0.771956	0.440141	0.532587	1.40715	2.47289	0.0134024	0.0388166	2.00212	2.30582	0.0211206	0.0699083
Prrt3	0.127804	0.771849	0.440204	0.532621	2.08161	8.44291	3.09526e-17	6.69184e-16	2.0548	5.19609	2.03527e-07	2.34141e-06
Sptb	0.0913159	0.767639	0.442702	0.53477	1.85764	9.61451	6.94408e-22	2.12791e-20	1.91344	7.17964	6.98966e-13	1.4282e-11
9130401M01Rik	0.165606	0.767603	0.442723	0.53477	0.959862	3.32006	0.000899997	0.00372899	0.579661	1.73859	0.0821061	0.195938
Camsap3	0.168057	0.758276	0.448286	0.540367	1.57557	5.40773	6.38293e-08	5.43976e-07	0.184741	0.533733	0.593526	0.745185
Ezh1	0.141638	0.740941	0.458729	0.550978	0.552584	2.46152	0.0138351	0.0398814	0.242604	0.848331	0.396254	0.585093
Mboat7	0.0999118	0.740255	0.459145	0.551434	0.778341	4.6163	3.90635e-06	2.6171e-05	0.275606	1.51937	0.12867	0.269925
Dgkq	0.207738	0.725007	0.468448	0.560292	0.916942	2.49081	0.0127452	0.0372421	0.311035	0.684756	0.493498	0.665932
Bcl9	0.118264	0.713387	0.475606	0.566969	0.612615	3.00042	0.0026961	0.00983293	0.595074	2.47855	0.0131917	0.0485612
Htt	0.0850474	0.693377	0.488073	0.578864	1.44765	8.62159	6.60315e-18	1.49059e-16	0.759508	3.33041	0.000867186	0.00493814
Zap70	0.335263	0.692704	0.488495	0.579274	2.12398	2.90357	0.0036894	0.0129787	1.89315	2.05309	0.040064	0.11572
Shc2	0.14809	0.68386	0.494063	0.585097	0.873563	3.10708	0.00188945	0.00719247	1.06467	2.79092	0.00525591	0.022724
Faim2	0.0694578	0.676936	0.498447	0.588995	1.16382	8.29203	1.11336e-16	2.29109e-15	1.61147	11.7122	1.10357e-31	9.85726e-30
R3hdm1	0.0838158	0.657187	0.51106	0.600661	0.721325	4.68857	2.7512e-06	1.8821e-05	1.74598	6.35144	2.13314e-10	3.51448e-09
Mmp17	0.0724223	0.655901	0.511888	0.601446	1.85358	11.9976	3.65768e-33	2.32246e-31	1.47473	9.07933	1.09247e-19	3.84828e-18
Armc6	0.1501	0.652226	0.514256	0.603756	1.18015	3.95713	7.58548e-05	0.000404406	0.707289	1.96198	0.0497653	0.135872
Ahr	0.268358	0.652091	0.514343	0.603756	1.57266	2.85926	0.00424628	0.0146669	1.3702	1.69077	0.0908808	0.210495
Gbf1	0.108962	0.649204	0.516206	0.605494	0.729319	3.73012	0.000191392	0.000929334	0.0911242	0.407294	0.683792	0.810274
Grasp	0.087755	0.635705	0.524969	0.613241	1.93984	9.75549	1.74763e-22	5.58607e-21	2.22214	7.7437	9.65621e-15	2.28695e-13
Slc6a17	0.0646301	0.629789	0.528833	0.616754	1.34626	9.19034	3.9159e-20	1.02409e-18	0.965806	6.71604	1.86732e-11	3.38417e-10
Arid5b	0.226048	0.628567	0.529633	0.617401	1.09272	2.40813	0.0160345	0.0449437	0.109279	0.221403	0.824778	0.898498
Ankrd13d	0.11684	0.617961	0.536601	0.623313	1.09541	4.26945	1.95956e-05	0.000116303	0.573778	1.96069	0.0499147	0.136195
Depdc5	0.0936571	0.602675	0.546725	0.632014	1.03592	4.80165	1.57367e-06	1.10801e-05	0.114083	0.495465	0.620272	0.765696
Tanc2	0.0860523	0.5957	0.551376	0.636028	1.13043	6.97954	2.96158e-12	4.01407e-11	0.0509431	0.292644	0.769794	0.865439
Tcof1	0.126783	0.589021	0.555847	0.639819	0.998254	3.66033	0.000251889	0.00119429	0.0645662	0.217114	0.82812	0.900713
Wdfy3	0.0718036	0.583357	0.559653	0.643367	1.04873	6.97221	3.11991e-12	4.22462e-11	0.253979	1.31225	0.189437	0.354204
Gpd2	0.0712519	0.570027	0.568659	0.651787	1.35826	8.27028	1.33645e-16	2.72234e-15	0.524634	2.89138	0.00383555	0.0175626
Cherp	0.0972618	0.566745	0.570888	0.654193	0.63797	3.00892	0.00262174	0.00959151	0.660704	2.40457	0.0161914	0.0568746
Irf2bp1	0.100081	0.559157	0.576054	0.658616	1.09817	4.67437	2.94856e-06	2.00884e-05	0.672258	2.53186	0.0113458	0.0429612
Slc12a5	0.0489502	0.504783	0.613712	0.691575	2.28035	14.7703	2.27807e-49	4.94026e-47	1.38943	7.23136	4.7819e-13	9.81898e-12
Kdm2b	0.11037	0.501772	0.615828	0.693133	0.635578	2.4025	0.0162834	0.0454862	0.26951	0.743092	0.457426	0.636838
Pwwp2b	0.0963079	0.495447	0.620285	0.696698	1.80191	6.59737	4.18527e-11	5.05965e-10	1.21966	3.46836	0.000523648	0.00317778
Adar	0.0709187	0.487027	0.626239	0.701925	0.910857	4.94352	7.6724e-07	5.65048e-06	0.483038	2.19691	0.0280268	0.0870529
Map3k4	0.0937079	0.477862	0.632749	0.707762	0.849461	3.33532	0.000851998	0.00355529	0.121163	0.443063	0.65772	0.792189
Rrp12	0.096797	0.469278	0.638871	0.712969	1.48149	5.23946	1.61044e-07	1.30315e-06	0.643835	2.07417	0.0380636	0.111316
Tmub2	0.0717355	0.46048	0.645172	0.717823	0.682537	3.48481	0.000492478	0.00217072	0.733485	2.90711	0.0036479	0.0168081
Pcdhb16	0.212099	0.420178	0.674355	0.743507	1.64379	2.53292	0.0113117	0.0336393	0.471007	0.656084	0.51177	0.681542
Dffa	0.0930198	0.414897	0.678218	0.746785	0.883245	3.15258	0.00161836	0.0062706	0.821902	2.04594	0.0407625	0.117369
Crhr1	0.152429	0.395725	0.692308	0.759418	1.84027	3.43236	0.000598344	0.00259117	1.82449	2.35972	0.0182888	0.0626238
Ubtf	0.0497409	0.38105	0.703166	0.76888	0.70059	4.24642	2.1721e-05	0.000128377	0.817617	3.8908	9.99142e-05	0.000730232
Aak1	0.0514144	0.370231	0.71121	0.7756	1.29432	7.74421	9.61781e-15	1.66143e-13	0.444588	1.82129	0.0685623	0.171887
Agtpbp1	0.0456402	0.363593	0.716162	0.780044	1.35465	8.5534	1.19512e-17	2.66556e-16	1.25484	5.45734	4.83319e-08	6.01983e-07
Gal3st3	0.0452048	0.33874	0.734806	0.795478	1.7006	8.84132	9.45981e-19	2.22613e-17	1.48756	5.73429	9.79216e-09	1.33973e-07
Prdm8	0.0794531	0.331797	0.740042	0.799658	2.01519	5.80867	6.297e-09	6.03006e-08	1.59677	3.48812	0.000486424	0.00298441
Ildr2	0.0429473	0.311427	0.755476	0.812329	0.804851	4.32052	1.55665e-05	9.43765e-05	0.349732	1.72983	0.0836613	0.198479
Dis3l2	0.0769242	0.306148	0.759492	0.815603	0.870282	2.90958	0.00361912	0.0127697	0.367452	1.04099	0.297881	0.483703
Arpc4	0.0363314	0.298552	0.765282	0.820131	0.481713	2.74039	0.0061366	0.0200653	0.868054	4.70703	2.51347e-06	2.46324e-05
Cog1	0.0561303	0.293496	0.769143	0.823393	1.47148	5.17363	2.29594e-07	1.81004e-06	0.731048	2.29755	0.0215872	0.071189
Mtx1	0.0705478	0.288873	0.772679	0.826067	0.665912	2.43806	0.0147665	0.0420927	0.165203	0.437482	0.661762	0.794972
Irf2bpl	0.0388084	0.251009	0.801807	0.849518	0.781586	3.83403	0.000126062	0.000641273	0.73201	3.12377	0.00178549	0.00914687
Tfip11	0.0482062	0.249028	0.803339	0.850723	0.614454	2.70382	0.00685471	0.0220301	0.526078	1.57814	0.114533	0.248912
Il1f9	0.126191	0.237591	0.812198	0.858182	2.50567	2.8862	0.00389919	0.0136148	0.98353	1.04575	0.295676	0.481185
Csmd2	0.0522993	0.233519	0.815359	0.860919	1.1112	4.2705	1.95038e-05	0.000115905	0.419179	1.05525	0.291311	0.475946
Brd4	0.026302	0.223402	0.823223	0.867587	0.850973	5.25922	1.44668e-07	1.17875e-06	0.413143	1.86204	0.0625978	0.16067
Sall2	0.0271239	0.194039	0.846145	0.885862	0.670666	3.85908	0.000113813	0.000584022	0.160248	0.816529	0.414198	0.600628
Ncoa1	0.0223931	0.19116	0.8484	0.887524	0.87676	5.84581	5.04095e-09	4.90388e-08	0.790359	4.64834	3.34614e-06	3.23115e-05
Pcdh8	0.0362071	0.186788	0.851827	0.890407	1.38756	5.16731	2.37488e-07	1.8681e-06	0.25741	0.8965	0.369986	0.55925
Sgsm3	0.0319131	0.178952	0.857976	0.895225	1.12501	4.58519	4.53578e-06	3.00171e-05	0.713678	2.83099	0.0046404	0.0205337
Slc1a6	0.0439184	0.142174	0.886942	0.917407	1.6527	3.92049	8.83705e-05	0.000464707	1.95456	3.04069	0.00236034	0.0116022
Slc22a17	0.0128516	0.136108	0.891736	0.920853	1.39379	10.3049	6.69374e-25	2.45716e-23	0.889481	6.53224	6.47924e-11	1.12376e-09
Myo16	0.0273565	0.124138	0.901206	0.927591	0.861161	3.03027	0.00244337	0.00903746	0.231908	0.734536	0.462622	0.641511
Rbm42	0.0176614	0.113966	0.909265	0.934168	0.537902	2.65508	0.00792888	0.0249421	0.869754	3.49048	0.00048216	0.00296285
Tnrc6c	0.0152105	0.0994837	0.920754	0.942705	0.566002	3.02249	0.00250703	0.00922934	0.44642	2.01444	0.0439635	0.12424
Glg1	0.0111479	0.0918497	0.926817	0.947693	1.20549	7.6243	2.45367e-14	4.05474e-13	0.188417	0.992677	0.320868	0.508367
Nipal3	0.011271	0.0694947	0.944596	0.960868	0.541085	2.53071	0.0113831	0.0338234	0.610656	2.32922	0.0198475	0.0665754
Usp5	0.00804269	0.0683603	0.945499	0.961657	1.12052	6.63938	3.1501e-11	3.85784e-10	0.387857	2.3256	0.0200397	0.067059
Crocc	0.0180969	0.0641651	0.948839	0.964062	0.957928	2.80638	0.0050102	0.0168997	1.72869	3.67846	0.000234642	0.00156658
Ash1l	0.00887023	0.0638261	0.949109	0.964161	0.608986	3.34619	0.000819309	0.00343209	0.188957	0.758235	0.448311	0.629245
Fstl4	0.0175355	0.0384609	0.96932	0.978381	3.48279	3.93637	8.27237e-05	0.000437715	0.184292	0.264236	0.791598	0.878578
Hs6st1	0.00281776	0.0154821	0.987648	0.991423	0.598031	2.72768	0.0063782	0.0207398	0.763671	2.24183	0.0249724	0.079582
Islr2	0.00156224	0.00843832	0.993267	0.99511	1.47562	6.14807	7.84308e-10	8.31874e-09	0.670908	2.39775	0.0164963	0.0576701
Eftud2	-0.000331486	-0.00206127	0.998355	0.998818	0.635751	2.88498	0.00391434	0.0136508	0.113098	0.41469	0.678369	0.806139
Prmt7	-0.00103268	-0.00526966	0.995795	0.997049	1.02665	3.80399	0.000142386	0.000712737	0.360854	1.19902	0.23052	0.408018
Rpusd1	-0.0014473	-0.00747379	0.994037	0.995617	1.07132	3.82183	0.000132464	0.000669974	1.037	3.4984	0.000468063	0.00288758
Focad	-0.00416097	-0.0195131	0.984432	0.989077	0.87212	3.14708	0.00164907	0.00637207	0.241284	0.69501	0.487049	0.66015
Rab26	-0.00405618	-0.0197243	0.984263	0.988974	1.82877	6.36581	1.94264e-10	2.19771e-09	1.56906	4.30412	1.67653e-05	0.00014156
Tnks1bp1	-0.00310096	-0.0211001	0.983166	0.988256	1.05425	5.34098	9.24469e-08	7.74752e-07	0.694194	3.24894	0.00115836	0.00634761
Cdk5r1	-0.00363697	-0.0339667	0.972904	0.981016	1.51817	10.3427	4.51728e-25	1.70256e-23	1.66914	8.90715	5.23608e-19	1.75073e-17
Phyhip	-0.00449077	-0.0471211	0.962417	0.973233	2.42675	16.6072	6.18314e-62	3.4863e-59	2.16856	15.6263	4.82117e-55	1.88402e-52
Mtmr3	-0.00723202	-0.0511902	0.959174	0.971123	0.804493	4.33678	1.44586e-05	8.80382e-05	0.172044	0.860477	0.389526	0.578231
Synrg	-0.00774678	-0.0521656	0.958397	0.970531	0.515321	2.62643	0.00862856	0.0268377	0.959976	3.97322	7.0908e-05	0.000536746
Mocs3	-0.0178958	-0.0578336	0.953881	0.967491	0.998433	2.56026	0.0104593	0.0314696	0.72824	1.48723	0.136954	0.281772
Pex14	-0.013995	-0.0762126	0.93925	0.956919	0.827389	3.47862	0.000504005	0.00221668	1.08092	3.69977	0.000215792	0.00145001
Snx25	-0.0131666	-0.0773258	0.938364	0.956524	0.812033	3.76301	0.000167878	0.000825971	1.61296	5.05779	4.24143e-07	4.63223e-06
Zc3hc1	-0.0261895	-0.112965	0.910058	0.934857	0.721663	2.49788	0.0124937	0.0366364	0.463929	1.35717	0.174727	0.335066
Klc2	-0.0137851	-0.121816	0.903045	0.928914	1.18455	7.63671	2.2285e-14	3.69999e-13	1.78105	10.6585	1.59068e-26	9.209e-25
Smyd5	-0.0251955	-0.127826	0.898286	0.925657	0.739097	2.84526	0.00443754	0.0152227	1.10324	3.01614	0.00256018	0.0124572
Ankrd34a	-0.0204383	-0.137603	0.890554	0.920136	1.67773	6.71588	1.86935e-11	2.32366e-10	2.1462	6.83579	8.15531e-12	1.52668e-10
Lrrc8b	-0.0357849	-0.141661	0.887348	0.917701	1.16892	3.43004	0.000603497	0.00261028	0.730149	1.63473	0.102106	0.229234
9130024F11Rik	-0.0434355	-0.147352	0.882855	0.914493	1.00206	2.59599	0.00943198	0.028913	1.84795	2.56482	0.010323	0.0397823
Smarca4	-0.0192426	-0.163454	0.870161	0.904415	1.13369	7.39098	1.45746e-13	2.24038e-12	0.441428	3.00388	0.00266562	0.012895
Dgat2	-0.0320763	-0.167459	0.867009	0.902035	1.19232	5.33176	9.72681e-08	8.13221e-07	1.63328	4.75892	1.94631e-06	1.93779e-05
Sult5a1	-0.10288	-0.175224	0.860903	0.897598	2.11085	2.36879	0.0178466	0.0491628	1.35419	1.22485	0.22063	0.395439
Me3	-0.0359607	-0.176005	0.86029	0.897083	0.646283	2.57588	0.00999867	0.0303753	0.64901	1.60725	0.108	0.238106
Dlgap2	-0.0345999	-0.186902	0.851737	0.890375	1.3786	5.48101	4.22911e-08	3.68022e-07	0.954925	3.05888	0.00222167	0.0109854
B4galt3	-0.0425873	-0.204198	0.838199	0.879506	0.886481	3.40809	0.000654203	0.00280208	0.664612	2.07591	0.0379022	0.110896
Arf5	-0.0235766	-0.210807	0.833038	0.875732	0.985949	5.6008	2.13364e-08	1.923e-07	0.178707	0.819731	0.412369	0.599288
Dact2	-0.0525356	-0.237696	0.812117	0.858155	2.03597	6.05491	1.40493e-09	1.44448e-08	2.31347	3.97913	6.91684e-05	0.000525487
Wnt4	-0.0528757	-0.241506	0.809163	0.855626	1.05994	3.75628	0.000172457	0.000846388	1.08841	3.10857	0.00187995	0.00955643
Cacna1c	-0.0402607	-0.245352	0.806184	0.853378	1.06069	4.88986	1.00905e-06	7.30914e-06	0.220782	0.849011	0.395875	0.584877
Rasgrf1	-0.026739	-0.251078	0.801754	0.849518	1.96771	11.5953	4.35288e-31	2.41568e-29	1.97331	8.22561	1.94195e-16	5.22238e-15
Abcf1	-0.0344675	-0.254222	0.799324	0.847124	0.622717	3.55949	0.000371575	0.00169122	0.34418	1.76231	0.0780169	0.189088
Coq8a	-0.0466378	-0.267279	0.789255	0.839159	0.981941	4.29239	1.76761e-05	0.000105891	2.11132	3.70685	0.000209854	0.00141621
Tle1	-0.041037	-0.268371	0.788414	0.838501	0.609551	2.95247	0.00315243	0.0112869	0.816441	3.36809	0.000756906	0.0043942
Per2	-0.0585214	-0.275513	0.782922	0.834245	1.37556	4.3853	1.15828e-05	7.17046e-05	0.549431	1.55029	0.121073	0.258695
Khsrp	-0.0441871	-0.301808	0.762799	0.818108	0.652828	3.55128	0.000383367	0.0017376	0.397001	1.88308	0.0596893	0.155503
Gpd1l	-0.0420859	-0.304199	0.760976	0.816732	1.05229	5.24537	1.55973e-07	1.26356e-06	0.992124	3.97352	7.08195e-05	0.000536726
Rgs14	-0.0402261	-0.304675	0.760613	0.816517	2.37488	12.4803	9.55753e-36	7.44326e-34	2.02121	8.66458	4.53189e-18	1.39241e-16
Cbx4	-0.061054	-0.309801	0.756712	0.813263	0.727639	3.1726	0.00151083	0.00590588	1.01649	3.37757	0.000731299	0.00427132
Kcnj4	-0.0605696	-0.339816	0.733995	0.795	2.15541	9.46625	2.90061e-21	8.41296e-20	1.5775	5.28765	1.23899e-07	1.47417e-06
Pum1	-0.0503195	-0.354712	0.722806	0.785864	0.735145	4.14659	3.37457e-05	0.000192739	0.939593	3.71711	0.000201518	0.00136659
Cep131	-0.0824258	-0.364815	0.715249	0.779274	0.87551	2.89785	0.00375731	0.013188	0.0974254	0.313058	0.754236	0.855253
Map6	-0.0611748	-0.404064	0.686166	0.75389	1.34708	6.62992	3.35871e-11	4.10263e-10	1.5107	5.47748	4.31418e-08	5.4057e-07
Gm9899	-0.169694	-0.418892	0.675295	0.74438	1.41494	2.43466	0.0149058	0.0423527	2.59497	2.69941	0.00694624	0.0289542
Gpr26	-0.132412	-0.443597	0.657334	0.728406	1.59708	3.62255	0.000291718	0.00136463	1.03654	1.99658	0.0458705	0.128267
Lyst	-0.115337	-0.467568	0.640094	0.713731	1.09291	3.35465	0.000794668	0.00334178	0.428745	1.03561	0.300386	0.486319
Tbr1	-0.125877	-0.481645	0.630058	0.705055	1.18594	3.21665	0.00129695	0.00515127	1.48888	2.61723	0.00886469	0.0352423
Prr36	-0.0979932	-0.482979	0.62911	0.704274	0.783323	2.98872	0.00280151	0.0101779	1.43332	3.56546	0.000363214	0.00231852
Asb6	-0.10961	-0.484979	0.627691	0.703031	0.774244	2.51684	0.0118411	0.034992	0.604506	1.7024	0.0886807	0.206781
Slit1	-0.0635649	-0.496381	0.619626	0.696267	2.24708	11.1294	9.02526e-29	4.29797e-27	1.48855	4.84754	1.25004e-06	1.26984e-05
Cadps2	-0.0693781	-0.524493	0.599935	0.679139	1.19364	7.19281	6.34714e-13	9.24269e-12	0.562498	3.30898	0.000936368	0.0052697
Maneal	-0.0939361	-0.53141	0.595135	0.675475	0.854091	3.71419	0.000203853	0.000983067	1.06254	3.46818	0.000523998	0.00317778
Clcnka	-0.231404	-0.532406	0.594445	0.67479	3.39301	4.23312	2.3047e-05	0.000135419	0.995801	1.26866	0.204563	0.373707
Ptpn5	-0.0753895	-0.543469	0.586807	0.66818	1.36839	7.23812	4.54963e-13	6.70832e-12	1.21627	6.11946	9.3894e-10	1.44777e-08
Mogs	-0.130416	-0.544543	0.586068	0.667439	0.951866	3.0801	0.00206933	0.0078139	0.770061	1.69138	0.0907651	0.210266
Zfyve28	-0.135415	-0.546206	0.584924	0.666388	1.11061	3.30393	0.000953395	0.00392532	1.07849	2.39985	0.016402	0.0574208
Phf24	-0.091213	-0.563097	0.573369	0.656339	1.40939	6.694	2.17144e-11	2.68732e-10	1.66462	4.62298	3.78267e-06	3.61638e-05
Arhgap32	-0.0761645	-0.575967	0.564637	0.647914	0.996923	5.80177	6.56186e-09	6.26243e-08	0.183526	0.698522	0.484851	0.658953
Tmem132a	-0.0761374	-0.5776	0.563534	0.646992	2.0357	12.2857	1.08046e-34	7.73106e-33	0.774117	4.66009	3.16067e-06	3.05915e-05
Klhdc3	-0.0752311	-0.582656	0.560125	0.643763	0.50426	3.11655	0.00182981	0.00699628	0.619166	3.44629	0.000568349	0.0034022
Tbc1d1	-0.110779	-0.593174	0.553065	0.637344	1.64519	6.53263	6.46255e-11	7.67448e-10	1.00144	3.47203	0.000516537	0.00314296
Ap2b1	-0.0741654	-0.595234	0.551687	0.63629	1.23655	7.843	4.39909e-15	7.79014e-14	1.29445	5.95224	2.64497e-09	3.87753e-08
Thop1	-0.109952	-0.602609	0.546769	0.632016	0.858655	3.71351	0.000204403	0.000985383	0.395519	1.51459	0.129875	0.271445
5330417C22Rik	-0.191287	-0.604326	0.545627	0.63113	1.19648	2.91936	0.00350754	0.0124164	0.810889	1.40095	0.161229	0.317507
Map11	-0.111113	-0.64373	0.519751	0.608556	0.734043	3.30708	0.000942755	0.00388797	0.527515	1.99005	0.0465859	0.12963
Gaa	-0.061896	-0.646383	0.518031	0.607296	1.44504	9.81661	9.55042e-23	3.10191e-21	0.326961	2.07716	0.0377865	0.110634
Celsr2	-0.0653829	-0.66047	0.508952	0.598975	1.89805	13.4692	2.37374e-41	2.76531e-39	0.64937	3.41217	0.000644487	0.00380156
Pdpk1	-0.0944002	-0.676964	0.498429	0.588995	1.05434	6.1194	9.39307e-10	9.84422e-09	0.688664	3.37348	0.000742237	0.00432914
Ranbp3	-0.107961	-0.710143	0.477615	0.568826	0.884485	4.16199	3.15484e-05	0.000180775	0.778903	3.51729	0.000435975	0.00271643
Pnck	-0.15336	-0.721216	0.470777	0.56241	0.94784	3.68884	0.000225278	0.00107864	0.835964	2.08189	0.0373528	0.109621
Cntnap5c	-0.176396	-0.721909	0.47035	0.562033	1.61394	4.11613	3.85282e-05	0.000217151	0.292629	0.79589	0.426096	0.611117
Nop58	-0.156818	-0.731156	0.464684	0.557023	1.10001	3.7036	0.000212559	0.00102226	0.00791884	0.0265487	0.97882	0.988532
Shb	-0.202838	-0.732084	0.464117	0.556433	1.02199	2.84622	0.00442413	0.0151956	0.499781	1.02379	0.305933	0.492177
Puf60	-0.100691	-0.744712	0.456446	0.548541	0.550311	3.14426	0.00166509	0.00642518	0.0315283	0.19756	0.843389	0.909815
Tollip	-0.101042	-0.757189	0.448937	0.541108	0.439259	2.66917	0.00760392	0.0240433	0.297951	1.49607	0.134636	0.278193
Ube2o	-0.105556	-0.77124	0.440565	0.532886	1.53524	8.11303	4.93749e-16	9.45636e-15	0.528255	2.55715	0.0105535	0.0405318
Prkcsh	-0.109153	-0.771603	0.44035	0.532712	0.614088	3.37062	0.00074999	0.00316902	0.0312529	0.163751	0.869927	0.925509
Slc24a4	-0.213608	-0.784964	0.432475	0.52516	1.12168	3.13096	0.00174238	0.00669044	0.29873	0.713669	0.475432	0.65178
Fkrp	-0.146092	-0.810045	0.417914	0.511133	0.863525	3.6527	0.000259495	0.00122746	1.1254	3.31094	0.000929818	0.00523756
C2cd2l	-0.101214	-0.828336	0.40748	0.500844	1.40897	8.8268	1.07708e-18	2.52622e-17	1.91895	8.89646	5.76567e-19	1.91755e-17
Adcy3	-0.141278	-0.830227	0.40641	0.499854	1.51945	6.81397	9.49411e-12	1.22218e-10	0.484289	2.01205	0.0442146	0.124863
Rprd2	-0.153782	-0.855595	0.392222	0.486241	0.934006	4.05404	5.03411e-05	0.000277951	0.247636	1.00929	0.312837	0.499301
Sort1	-0.0871439	-0.868668	0.385029	0.478776	1.47286	10.2446	1.25104e-24	4.52171e-23	0.823909	4.52588	6.01434e-06	5.51792e-05
Lrrc8d	-0.163584	-0.869786	0.384418	0.478213	0.885641	3.53516	0.000407535	0.001833	0.838847	2.86397	0.00418362	0.0188391
Cacnb1	-0.105014	-0.872902	0.382717	0.476449	1.64179	9.42658	4.23677e-21	1.21139e-19	1.7814	9.09394	9.55162e-20	3.38366e-18
Actl6b	-0.135778	-0.92073	0.357192	0.450085	1.47371	7.04314	1.87952e-12	2.60508e-11	1.25327	4.37512	1.21365e-05	0.000104739
Coro1c	-0.129507	-0.921626	0.356724	0.449676	0.748003	3.91996	8.85632e-05	0.000465469	0.193791	0.988037	0.323135	0.510485
Tuba4a	-0.0925096	-0.924153	0.355407	0.448359	1.42561	10.136	3.82509e-24	1.35134e-22	0.250394	2.22001	0.026418	0.0830461
Paqr9	-0.26322	-0.944308	0.345012	0.43718	1.82629	4.49298	7.02342e-06	4.50419e-05	1.28888	2.49692	0.0125279	0.0465838
Sorl1	-0.112302	-0.990323	0.322016	0.412746	1.9354	10.7965	3.57423e-27	1.51754e-25	0.12905	0.453621	0.650102	0.786654
Pnma3	-0.318608	-1.00154	0.316568	0.406935	1.25209	2.91571	0.00354882	0.0125437	1.45397	2.48122	0.0130932	0.0482554
Dagla	-0.112786	-1.00512	0.31484	0.4053	2.02917	11.9936	3.8394e-33	2.42503e-31	1.61443	8.2008	2.3879e-16	6.3805e-15
Clcn4	-0.113995	-1.00989	0.312549	0.402753	0.42902	2.97358	0.0029435	0.0106389	0.327111	2.18933	0.0285729	0.0882888
Psmd2	-0.117404	-1.01226	0.311416	0.401473	0.374803	2.50274	0.0123237	0.0362134	0.00624264	0.0414753	0.966917	0.981499
Rapgef2	-0.125371	-1.02241	0.306587	0.396465	1.82426	10.849	2.01551e-27	8.71491e-26	1.09799	5.21597	1.82859e-07	2.1114e-06
Fry	-0.12011	-1.0759	0.281972	0.370207	1.75154	10.6657	1.47362e-26	6.0035e-25	1.1061	5.85276	4.83495e-09	6.85499e-08
Hnrnpa0	-0.134501	-1.08398	0.278372	0.366628	0.611359	3.81099	0.000138414	0.00069483	0.314497	1.85934	0.0629785	0.161349
Camkk1	-0.139135	-1.09543	0.273327	0.361305	1.84687	9.32965	1.06219e-20	2.94738e-19	1.77296	8.13513	4.11485e-16	1.08787e-14
Dcaf12l1	-0.2227	-1.10594	0.268754	0.356272	1.71965	5.77493	7.6984e-09	7.28789e-08	1.04491	2.94333	0.00324703	0.0152647
Gnl2	-0.251049	-1.12862	0.259058	0.345411	0.934954	3.05146	0.00227733	0.00849239	0.0784941	0.225377	0.821686	0.8963
Mrpl38	-0.252897	-1.13262	0.257373	0.343733	0.642198	2.54195	0.0110236	0.0328934	0.0694644	0.238198	0.811728	0.890533
Psmd3	-0.146459	-1.14253	0.253234	0.338953	0.756792	4.36368	1.27891e-05	7.8483e-05	0.403038	2.1817	0.0291318	0.0897274
Pgr	-0.336935	-1.1634	0.244667	0.329364	0.878612	2.40426	0.0162052	0.0453412	1.52652	2.69389	0.00706239	0.0292725
Mycbp2	-0.129057	-1.17714	0.23914	0.323266	1.33637	9.52094	1.71621e-21	5.07164e-20	0.508053	3.34983	0.000808615	0.00464428
Inpp4a	-0.170377	-1.18021	0.237917	0.321929	1.26028	6.67083	2.54367e-11	3.13149e-10	0.654864	2.20461	0.0274815	0.0856785
Lmo1	-0.229935	-1.19594	0.231719	0.314696	0.623819	2.50669	0.0121868	0.0358632	1.73523	4.37205	1.23087e-05	0.000106152
Pianp	-0.145537	-1.19883	0.230592	0.313533	1.18239	7.2207	5.17209e-13	7.58646e-12	1.83459	9.22774	2.76414e-20	1.02874e-18
Usp7	-0.161173	-1.20394	0.228614	0.311291	0.959414	5.26656	1.39003e-07	1.13653e-06	0.408247	2.13187	0.0330179	0.0991329
Pi4k2a	-0.190247	-1.21821	0.223146	0.304669	0.521799	2.61814	0.00884111	0.0273777	0.212362	0.952858	0.340662	0.528468
Ube4b	-0.202044	-1.23275	0.21767	0.298541	0.632948	2.71597	0.0066081	0.0213397	0.00416815	0.0182312	0.985454	0.992279
Zswim1	-0.293404	-1.24609	0.212731	0.293097	0.903977	2.9337	0.00334947	0.0119077	0.716152	1.83493	0.0665165	0.16814
Pcdh19	-0.168986	-1.25604	0.209103	0.288967	2.02172	11.0866	1.45646e-28	6.88936e-27	1.18598	5.05463	4.31235e-07	4.70147e-06
Kcns1	-0.444823	-1.2568	0.208827	0.288611	1.69949	3.10801	0.0018835	0.00717174	1.77199	2.319	0.0203949	0.0680645
Dok4	-0.329305	-1.26822	0.204718	0.28418	0.910988	2.72076	0.0065133	0.0210819	1.4187	2.80252	0.0050705	0.0220315
Wrap73	-0.337123	-1.27092	0.203756	0.283104	0.793851	2.40474	0.0161839	0.0452994	0.379266	0.932294	0.351184	0.539239
Slc45a1	-0.265824	-1.27759	0.201395	0.280314	1.03246	3.4094	0.000651063	0.00279117	1.20144	3.13354	0.00172711	0.00889519
Lct	-0.270947	-1.28191	0.199874	0.278607	2.94886	9.68204	3.59483e-22	1.12108e-20	1.73963	4.3088	1.6414e-05	0.000138969
Slc4a8	-0.186937	-1.28687	0.19814	0.276675	0.886703	4.70303	2.56332e-06	1.76429e-05	0.465269	1.80643	0.070851	0.176116
Ppm1l	-0.321531	-1.31003	0.190186	0.267372	0.948937	2.8586	0.00425515	0.0146939	0.399054	0.937869	0.348312	0.536129
Stx6	-0.190476	-1.3144	0.188711	0.265743	0.501452	2.75624	0.00584705	0.019248	1.27993	5.02814	4.95265e-07	5.35752e-06
Pom121	-0.212031	-1.31923	0.187092	0.263856	1.0711	5.08538	3.66897e-07	2.81228e-06	0.80346	3.28956	0.00100343	0.00559922
Fibcd1	-0.139972	-1.32129	0.186405	0.26301	2.8442	17.6889	5.10459e-70	4.49715e-67	2.42332	11.0979	1.28395e-28	8.4951e-27
Lpin2	-0.227353	-1.32637	0.184716	0.261016	0.819831	3.65801	0.00025418	0.00120394	0.585246	1.65214	0.0985065	0.223237
Slc9a1	-0.207592	-1.32886	0.183894	0.260146	0.996133	4.55169	5.32168e-06	3.48418e-05	0.795912	3.26401	0.00109846	0.00605385
Lingo3	-0.185647	-1.33022	0.183445	0.259609	2.72222	12.0965	1.10242e-33	7.29562e-32	2.09136	6.7627	1.35443e-11	2.49076e-10
Wfs1	-0.141799	-1.35945	0.174003	0.248362	2.74506	16.13	1.57057e-58	6.91836e-56	2.5415	10.9559	6.22561e-28	4.01295e-26
Tyro3	-0.158644	-1.36713	0.171585	0.245513	1.79337	11.1566	6.65068e-29	3.18871e-27	1.37077	5.96191	2.49305e-09	3.68071e-08
Rtn4rl2	-0.272692	-1.37042	0.170555	0.244294	1.78512	6.48435	8.91136e-11	1.04331e-09	2.35458	4.80417	1.55392e-06	1.56708e-05
Pcdha6	-0.655666	-1.38194	0.166992	0.240123	2.15389	2.69255	0.00709076	0.0226723	1.71291	1.51025	0.130979	0.27321
Camta1	-0.157322	-1.39724	0.162341	0.234592	1.32432	8.9289	4.30262e-19	1.03852e-17	1.06646	5.89871	3.66357e-09	5.26585e-08
Fbxo11	-0.190751	-1.41426	0.157284	0.228358	0.675552	3.91468	9.05235e-05	0.000474907	0.629063	3.10077	0.00193016	0.0097682
Tbc1d10b	-0.204423	-1.41429	0.157276	0.228358	0.619679	3.37974	0.000725556	0.00307685	0.962296	4.22411	2.39888e-05	0.000196837
Atxn2	-0.222304	-1.4368	0.150776	0.220284	0.542213	2.70061	0.00692122	0.0222084	0.275469	1.27864	0.201022	0.36924
Slc7a4	-0.217387	-1.44214	0.149262	0.218389	2.20172	9.61979	6.59654e-22	2.02581e-20	1.81986	6.35793	2.04495e-10	3.37808e-09
Scn8a	-0.145536	-1.44538	0.148352	0.217289	2.38615	14.8036	1.38792e-49	3.05689e-47	1.79886	8.52492	1.5292e-17	4.47837e-16
Mapkbp1	-0.303734	-1.44746	0.147768	0.216544	0.706789	2.61593	0.00889846	0.0275374	0.164906	0.504179	0.614136	0.760449
Ralgapb	-0.208747	-1.44765	0.147714	0.216544	0.585716	3.37361	0.000741888	0.00313855	0.0318486	0.138058	0.890195	0.937264
Vps26b	-0.201908	-1.48178	0.138399	0.205035	0.441664	2.4707	0.0134848	0.0389992	0.356559	1.81134	0.0700884	0.174837
Supt6	-0.188854	-1.48796	0.136762	0.202927	0.558838	3.53671	0.000405145	0.00182421	0.158508	0.949297	0.342469	0.530297
Tomm40	-0.219791	-1.50073	0.133425	0.198796	0.497465	2.57153	0.0101251	0.0306998	0.363461	1.77666	0.0756249	0.184958
Gabbr1	-0.149786	-1.51004	0.131033	0.195792	0.595792	4.48341	7.34609e-06	4.68554e-05	0.399963	3.47655	0.000507912	0.0031028
Efna3	-0.247052	-1.53408	0.125009	0.188036	1.51071	6.48513	8.86578e-11	1.03884e-09	1.98398	5.94942	2.69094e-09	3.93569e-08
Pacs1	-0.228224	-1.53976	0.123618	0.186258	1.28573	6.40695	1.48464e-10	1.70142e-09	0.821339	3.26389	0.00109894	0.00605386
Nedd4l	-0.222219	-1.57552	0.115135	0.175207	1.09265	5.73387	9.81642e-09	9.18807e-08	1.25875	5.72635	1.02613e-08	1.4002e-07
Nat14	-0.21803	-1.5798	0.114152	0.173972	0.741207	4.16611	3.09835e-05	0.000177972	1.38147	6.01581	1.78985e-09	2.68371e-08
Ppip5k1	-0.284389	-1.5818	0.113696	0.173403	0.721418	3.00807	0.00262912	0.00961351	0.107053	0.437358	0.661852	0.794972
Wars	-0.235294	-1.59504	0.110703	0.169649	0.688986	3.46864	0.000523107	0.00229568	0.174229	0.77365	0.439138	0.621764
Mfsd4a	-0.234139	-1.60555	0.108373	0.166678	1.48991	6.68136	2.36736e-11	2.92459e-10	1.35642	5.47534	4.36662e-08	5.46593e-07
Nuak1	-0.240584	-1.63408	0.102241	0.158537	0.822765	4.37457	1.2167e-05	7.48932e-05	0.478649	2.33476	0.0195558	0.0657911
Gpc4	-0.421752	-1.64662	0.0996364	0.154943	1.44183	4.57437	4.77644e-06	3.15505e-05	0.77852	2.12665	0.0334489	0.10028
Zrsr1	-0.327168	-1.65074	0.098792	0.153852	0.469926	2.42115	0.0154715	0.0437047	0.28788	0.880045	0.378835	0.567685
Ar	-0.290474	-1.65914	0.0970881	0.151542	1.97076	7.8955	2.89142e-15	5.19204e-14	1.70797	5.28389	1.26466e-07	1.50329e-06
Adgrl3	-0.22919	-1.67348	0.0942332	0.147833	1.03205	5.43103	5.60313e-08	4.81302e-07	0.217516	0.756818	0.449159	0.62989
Slc8a2	-0.193192	-1.71005	0.0872569	0.138572	2.62491	16.4744	5.59972e-61	2.92347e-58	1.57183	7.7781	7.36213e-15	1.76367e-13
Mex3b	-0.484328	-1.71193	0.0869101	0.138079	0.941778	2.45774	0.0139813	0.0402204	1.35245	2.20387	0.0275336	0.0857339
Slc2a6	-0.443299	-1.72039	0.0853621	0.135934	1.64398	4.12278	3.7432e-05	0.000211649	0.754572	1.64628	0.0997064	0.225087
Abcg4	-0.318353	-1.73899	0.0820374	0.131331	0.629812	2.43471	0.0149035	0.0423527	0.279626	0.981247	0.326471	0.514003
Ephb6	-0.254638	-1.74843	0.0803894	0.129062	1.53663	7.17045	7.4749e-13	1.0829e-11	0.781921	3.48868	0.00048542	0.00298142
Egr4	-0.32399	-1.75147	0.0798651	0.12837	2.98468	9.44505	3.55252e-21	1.02405e-19	1.88405	4.91941	8.68057e-07	9.02332e-06
C1ql3	-0.771608	-1.76996	0.0767337	0.123877	2.12524	9.42296	4.38562e-21	1.24841e-19	2.42732	7.82224	5.18914e-15	1.25271e-13
Osbp2	-0.282135	-1.78765	0.073832	0.119717	1.61506	7.03003	2.06491e-12	2.84248e-11	1.32529	4.62855	3.68238e-06	3.5286e-05
Gas7	-0.194064	-1.80881	0.0704803	0.11496	1.32754	9.4412	3.6854e-21	1.06019e-19	0.862603	5.08085	3.75757e-07	4.13631e-06
Dcaf7	-0.225562	-1.86226	0.062566	0.10356	0.594986	3.39583	0.000684219	0.00291559	0.0845161	0.448337	0.65391	0.789243
Napa	-0.224651	-1.87148	0.061278	0.10165	0.683121	4.49235	7.04431e-06	4.51348e-05	0.919074	5.13833	2.77194e-07	3.10324e-06
Rangap1	-0.232898	-1.88129	0.0599319	0.099625	1.04344	6.22694	4.75641e-10	5.18132e-09	0.962043	4.56804	4.92315e-06	4.58449e-05
Hs6st3	-0.463268	-1.88446	0.0595023	0.0990133	2.92313	6.74884	1.49034e-11	1.88073e-10	0.902257	2.00309	0.0451681	0.127006
Ccnd1	-0.284811	-1.89048	0.0586936	0.0978896	0.547883	2.82496	0.00472872	0.0160424	0.328941	1.5987	0.109888	0.24146
Capn1	-0.516122	-1.90271	0.0570787	0.0955652	1.08365	2.87544	0.0040346	0.0140078	0.787258	1.65093	0.0987525	0.223673
Tomm34	-0.269735	-1.90652	0.0565829	0.0948296	1.0283	5.42396	5.82918e-08	4.99806e-07	0.989552	4.58148	4.61705e-06	4.33446e-05
Lonrf2	-0.299637	-1.91726	0.0552048	0.0927979	1.24721	5.83346	5.42905e-09	5.25243e-08	0.732884	2.40679	0.0160932	0.0566571
Prrt1	-0.265644	-1.9207	0.0547697	0.0921382	1.27016	6.84209	7.80484e-12	1.01305e-10	1.89568	6.9018	5.13486e-12	9.81825e-11
Camk1g	-0.444065	-1.92559	0.0541562	0.0912279	0.967729	2.87546	0.00403437	0.0140078	1.10039	2.78551	0.00534435	0.0230532
Abr	-0.189025	-1.92661	0.0540279	0.0910321	0.90508	6.8384	8.0084e-12	1.03661e-10	0.834206	5.96841	2.39575e-09	3.54543e-08
Ccdc92	-0.290458	-1.93963	0.0524243	0.0886067	0.783652	4.00237	6.27117e-05	0.000339602	1.34548	4.9916	5.98809e-07	6.38372e-06
Lingo1	-0.221123	-1.96435	0.0494891	0.084097	2.45498	12.6997	5.93755e-37	4.98188e-35	2.0465	10.1602	2.98355e-24	1.42948e-22
Nwd2	-0.734391	-1.96795	0.0490738	0.0834757	1.75829	2.789	0.00528707	0.0176455	1.89738	2.06562	0.0388646	0.113182
Pcdha9	-0.741978	-1.98735	0.0468838	0.0801836	1.78104	2.71806	0.00656662	0.0212252	2.82932	2.5314	0.0113608	0.0429853
Camsap1	-0.288428	-1.99218	0.0463513	0.0793537	0.922859	4.93172	8.15092e-07	5.9748e-06	0.743105	3.34366	0.000826813	0.00473194
Sez6l2	-0.212124	-1.99553	0.045985	0.0788337	1.34791	9.57451	1.02337e-21	3.0758e-20	0.751377	4.71058	2.47007e-06	2.42451e-05
Rasal2	-0.337205	-1.9991	0.0455973	0.0782843	0.561883	2.6292	0.00855853	0.026661	0.0119537	0.0458756	0.963409	0.979679
Nr3c2	-0.274452	-2.00877	0.0445612	0.076671	1.79391	9.04681	1.47204e-19	3.67255e-18	1.06261	3.72818	0.000192864	0.00131503
Kat2a	-0.330626	-2.02128	0.0432512	0.0747319	0.834319	3.73877	0.00018492	0.000902575	0.308385	1.25605	0.209098	0.380164
Wrnip1	-0.335098	-2.02549	0.0428174	0.074033	0.535403	2.54103	0.0110526	0.032959	0.194875	0.790821	0.429048	0.613382
Pwp2	-0.498575	-2.04934	0.0404286	0.0704669	0.993275	3.07296	0.00211949	0.00797609	0.508753	1.26326	0.206494	0.376306
Slc9a6	-0.304587	-2.05152	0.0402167	0.070146	0.503427	2.77811	0.00546754	0.0181564	0.691545	3.3059	0.000946716	0.00532076
Pgap3	-0.721736	-2.05233	0.0401379	0.0700167	1.29486	2.54326	0.0109823	0.032791	0.226501	0.349371	0.726811	0.838679
Ddost	-0.280265	-2.05652	0.0397328	0.0693661	0.406465	2.41021	0.0159434	0.044764	0.0514699	0.290588	0.771367	0.866078
Ackr1	-0.470294	-2.07211	0.0382549	0.0670648	1.23251	3.89627	9.76842e-05	0.000508102	1.0313	2.59532	0.00945024	0.0371033
Otub1	-0.228567	-2.0733	0.038144	0.0669248	0.944288	5.8109	6.21374e-09	5.95437e-08	0.750673	3.87351	0.000107279	0.000780412
C530008M17Rik	-0.386674	-2.11338	0.0345686	0.0613133	0.637113	3.06516	0.00217553	0.00815592	0.709682	2.1308	0.0331056	0.0993723
Riox1	-0.690144	-2.11864	0.0341213	0.0605901	1.30577	2.89081	0.00384252	0.0134436	0.100093	0.209412	0.834127	0.904584
Ogfod1	-0.341653	-2.12168	0.0338642	0.060177	0.467569	2.46476	0.0137103	0.0395783	0.542284	1.90052	0.0573653	0.151239
Ppp5c	-0.302602	-2.12971	0.0331958	0.0591073	0.506493	2.73761	0.00618878	0.0202125	0.12703	0.617781	0.53672	0.700798
Abcc8	-0.563318	-2.15589	0.031092	0.0557686	2.41276	5.71415	1.10252e-08	1.02582e-07	0.849483	1.88849	0.0589607	0.154049
Fras1	-0.797392	-2.15972	0.0307942	0.0552935	1.44174	2.61807	0.00884297	0.0273777	0.317605	0.462781	0.643522	0.782435
Fbxo21	-0.28803	-2.16626	0.0302913	0.0545199	0.922218	5.26355	1.413e-07	1.15264e-06	0.727009	3.48731	0.000487907	0.00298789
Scn4b	-0.516207	-2.17202	0.029854	0.0538676	2.03634	5.16582	2.39384e-07	1.88196e-06	1.91186	3.5097	0.000448618	0.00278134
Has3	-1.08346	-2.17235	0.0298295	0.0538363	3.08469	3.00172	0.00268458	0.00979849	0.266588	0.324588	0.745493	0.850184
Plxna4	-0.250594	-2.18638	0.0287875	0.0522113	1.99785	12.2846	1.09636e-34	7.80522e-33	0.94819	4.28819	1.80137e-05	0.000151183
Pfkl	-0.272984	-2.2048	0.0274683	0.0500951	1.29214	8.88212	6.55993e-19	1.55671e-17	0.228496	1.50806	0.131538	0.273771
Dclk3	-0.716775	-2.22205	0.0262802	0.0481724	1.43339	3.07829	0.0020819	0.00785717	2.28255	2.88213	0.00394993	0.017981
Prr14l	-0.364808	-2.22348	0.0261835	0.0480185	0.583544	2.87443	0.00404758	0.0140425	0.150773	0.511365	0.609095	0.756529
Igfbp6	-0.761508	-2.22516	0.0260707	0.0478232	1.82282	3.57612	0.000348725	0.00159598	3.82006	3.19765	0.00138554	0.00740118
Hid1	-0.336659	-2.24261	0.024922	0.0459166	1.00004	5.18839	2.12115e-07	1.67882e-06	0.661172	3.06058	0.00220905	0.0109316
Frzb	-0.763079	-2.25373	0.0242129	0.0447246	1.81345	3.21459	0.0013063	0.0051811	1.36684	1.8088	0.0704823	0.175644
Amer3	-0.624071	-2.26324	0.0236211	0.0437116	1.94485	4.6026	4.17245e-06	2.77953e-05	1.63906	2.63119	0.00850875	0.0341032
Zfp251	-0.43019	-2.29397	0.0217923	0.0406659	0.83736	3.29638	0.000979392	0.00400973	0.624094	2.05619	0.0397644	0.115108
Pebp1	-0.238096	-2.31465	0.0206319	0.03873	0.35954	2.54416	0.0109542	0.0327488	0.498083	3.72331	0.000196626	0.00133704
Rap1gap	-0.395233	-2.31664	0.0205234	0.0385454	1.25595	2.68013	0.00735932	0.0234222	0.0819913	0.382035	0.702436	0.822545
Zfp462	-0.401926	-2.33938	0.0193159	0.0364998	0.589088	2.79929	0.0051215	0.0172051	0.127998	0.417616	0.676228	0.804818
Dpf1	-0.466137	-2.35809	0.0183695	0.0348902	0.97056	3.70925	0.000207874	0.00100007	0.947051	2.81157	0.00493011	0.0215479
Eif4g3	-0.308384	-2.38623	0.017022	0.0326425	0.607854	3.59227	0.000327806	0.0015081	0.229884	1.2594	0.207888	0.378459
Shisa6	-0.317105	-2.39656	0.0165496	0.0317972	1.76106	10.2264	1.50982e-24	5.42919e-23	1.22882	5.28847	1.23342e-07	1.46895e-06
Scn2b	-0.271628	-2.39928	0.0164271	0.031602	1.51426	9.60832	7.37411e-22	2.2499e-20	0.759888	4.99077	6.01393e-07	6.40036e-06
Bcl7a	-0.387789	-2.40635	0.0161127	0.0310406	0.710795	3.41707	0.000633	0.00272119	0.979803	4.04955	5.13166e-05	0.000399076
Rnft2	-0.345736	-2.40972	0.0159649	0.0308031	1.15259	5.85975	4.63561e-09	4.52391e-08	0.784133	3.70497	0.000211416	0.0014252
Ywhag	-0.246758	-2.44768	0.0143777	0.0280848	1.605	11.38	5.26164e-30	2.65835e-28	1.21473	9.94531	2.6435e-23	1.18484e-21
Tmem63c	-0.630853	-2.44798	0.0143661	0.0280658	1.58624	4.13321	3.57725e-05	0.000202917	1.22325	2.48562	0.0129325	0.0477759
Mapre3	-0.294082	-2.45125	0.014236	0.0278368	1.16699	7.45578	8.93389e-14	1.38845e-12	1.24798	5.47404	4.3988e-08	5.50069e-07
Plekha6	-0.521192	-2.4793	0.013164	0.0259452	0.685537	2.45077	0.0142552	0.0409081	0.799615	1.71774	0.0858437	0.201933
Dnah9	-0.623407	-2.50223	0.0123415	0.0244646	1.14451	3.28017	0.00103746	0.00421321	1.57876	2.24431	0.0248123	0.0791728
Rnf19b	-0.456841	-2.51055	0.0120543	0.0239485	0.780747	3.2923	0.000993703	0.00406007	0.817037	2.83888	0.00452721	0.0201182
Tmem158	-0.408477	-2.5412	0.0110474	0.0221167	1.36185	5.83731	5.30497e-09	5.15361e-08	1.81159	6.24162	4.33069e-10	6.9341e-09
Zdhhc14	-0.477863	-2.55802	0.0105269	0.021204	0.937964	3.60776	0.000308853	0.0014321	1.11978	2.93029	0.00338641	0.0158011
Pnmal2	-0.315151	-2.56366	0.0103574	0.0208875	1.15234	7.96588	1.64057e-15	3.0033e-14	0.749692	3.65664	0.000255547	0.00169259
Lypla2	-0.351107	-2.56674	0.0102659	0.0207195	0.720273	3.68592	0.000227876	0.00109034	0.688515	3.42171	0.000622285	0.00368276
Dcaf6	-0.373539	-2.5681	0.0102256	0.0206466	0.798869	4.16895	3.06009e-05	0.000176205	0.754649	3.29754	0.000975354	0.00546207
Syt17	-0.539778	-2.589	0.00962545	0.0195523	0.676937	2.39643	0.0165555	0.0460833	1.47936	3.52033	0.000431008	0.00269219
Coro2b	-0.294668	-2.59159	0.00955343	0.019419	0.685316	4.55466	5.24709e-06	3.44174e-05	0.513914	3.2304	0.00123619	0.00671525
Cdkl4	-0.941749	-2.63165	0.00849702	0.0174429	2.06135	3.32341	0.000889257	0.00368567	1.5902	2.00188	0.045298	0.127114
Map1b	-0.243319	-2.63176	0.00849442	0.0174399	2.18288	15.9615	2.37142e-57	8.79673e-55	0.477089	4.5555	5.22601e-06	4.83725e-05
Btrc	-0.39204	-2.63434	0.00843007	0.0173313	0.723662	3.61309	0.000302564	0.00140711	0.0283616	0.142064	0.887029	0.935408
Zswim5	-0.669782	-2.63605	0.00838769	0.0172583	0.849	2.49427	0.0126215	0.0369268	0.873559	1.92681	0.0540036	0.144545
Galnt16	-0.27256	-2.64106	0.00826477	0.0170262	1.72959	11.1371	8.27724e-29	3.95512e-27	1.16924	6.79393	1.09116e-11	2.02748e-10
Copg1	-0.311543	-2.66514	0.00769561	0.0159537	0.810715	5.32668	1.00022e-07	8.34753e-07	0.273799	1.80019	0.07183	0.177727
Camk1d	-0.361699	-2.67723	0.00742335	0.0154274	1.27228	7.40625	1.29926e-13	2.00595e-12	1.0709	4.12147	3.76469e-05	0.000299856
Tmem151a	-0.305214	-2.68796	0.00718895	0.0149773	0.948602	6.09653	1.08396e-09	1.12847e-08	0.912484	5.22274	1.76297e-07	2.04129e-06
Prkar1b	-0.285622	-2.70027	0.00692832	0.0144922	1.17641	7.63961	2.17877e-14	3.62596e-13	1.12216	8.26387	1.41028e-16	3.88449e-15
Reep2	-0.457145	-2.70329	0.00686576	0.0143773	0.943201	4.84476	1.26766e-06	9.04295e-06	0.993603	4.16084	3.17077e-05	0.000255151
Tmem121b	-0.417032	-2.71503	0.00662697	0.0139332	1.81647	7.75638	8.73877e-15	1.51329e-13	1.77384	5.23336	1.66452e-07	1.93626e-06
Tenm4	-0.374307	-2.7446	0.00605846	0.0128092	1.72115	9.60562	7.56978e-22	2.30461e-20	0.760227	3.16482	0.00155181	0.00810922
Entpd4	-0.44709	-2.75665	0.00583972	0.0123866	0.615407	3.00861	0.00262442	0.0095988	0.802759	3.21326	0.00131238	0.00707386
Cyp46a1	-0.353554	-2.75778	0.00581954	0.0123524	1.18569	6.81007	9.7551e-12	1.25085e-10	1.00998	5.26205	1.42455e-07	1.68056e-06
B4galt5	-0.544152	-2.78061	0.00542576	0.0115833	0.782534	3.00644	0.00264329	0.0096528	0.616473	1.96943	0.0489035	0.134021
Spata2l	-0.509558	-2.78613	0.00533411	0.0114005	1.62634	5.90318	3.56568e-09	3.52467e-08	1.55858	4.63025	3.65227e-06	3.50243e-05
Ipo5	-0.433581	-2.82883	0.00467191	0.0100821	0.515914	2.66377	0.00772702	0.0243746	0.672743	2.4084	0.0160228	0.0564408
Clip4	-0.481376	-2.83632	0.00456361	0.0098752	0.587234	2.88054	0.00396996	0.013814	0.815878	2.84697	0.00441377	0.0196911
Lrrc47	-0.460331	-2.84977	0.00437511	0.00952183	0.665951	3.24253	0.00118472	0.00475236	0.783065	2.0109	0.0443365	0.125093
Actg1	-0.262159	-2.85547	0.0042973	0.00936462	0.719174	5.74258	9.32426e-09	8.75065e-08	0.485863	4.58132	4.62042e-06	4.33446e-05
Crim1	-0.369644	-2.87832	0.00399802	0.0087528	0.824849	4.8434	1.27637e-06	9.09591e-06	0.676226	3.11375	0.00184727	0.0094094
Syn2	-0.329916	-2.89821	0.00375305	0.00825474	1.1608	7.57924	3.47593e-14	5.67749e-13	0.952735	6.59758	4.17936e-11	7.3095e-10
Slc25a22	-0.330479	-2.90406	0.00368354	0.00811366	1.57296	9.70807	2.78551e-22	8.72546e-21	1.41225	6.79361	1.09364e-11	2.02908e-10
2900026A02Rik	-0.439175	-2.92302	0.00346659	0.0076783	1.20466	5.76064	8.37943e-09	7.91135e-08	1.33488	4.53929	5.64435e-06	5.1899e-05
Anxa11	-1.52117	-2.92502	0.00344437	0.00763467	1.53924	3.89946	9.64091e-05	0.000502211	1.52902	3.08114	0.00206211	0.0103437
Svop	-0.332785	-2.94284	0.00325221	0.00724701	1.82156	10.182	2.38562e-24	8.49184e-23	1.5573	8.54083	1.33258e-17	3.92092e-16
Pgam2	-1.02361	-2.95424	0.00313444	0.00700729	2.23807	3.75735	0.000171722	0.000843119	1.13971	1.56879	0.116696	0.252209
Rmnd5b	-0.523569	-2.95493	0.00312735	0.00699248	0.814179	3.37525	0.000737483	0.00312085	0.486704	1.74364	0.0812223	0.194412
Shisa7	-0.331634	-2.97539	0.00292616	0.00657375	1.77297	10.317	5.903e-25	2.18396e-23	1.41758	6.73588	1.62937e-11	2.96153e-10
Atf6	-0.538132	-2.99515	0.00274311	0.00619289	0.988808	3.93352	8.37114e-05	0.000442443	0.500533	1.72311	0.0848682	0.200136
Fbll1	-0.622053	-3.00127	0.0026886	0.00608072	1.3551	4.72174	2.33834e-06	1.61417e-05	1.13018	3.18049	0.00147025	0.00775761
Smad3	-0.55168	-3.00294	0.00267386	0.00605463	0.628557	2.54154	0.0110364	0.0329247	0.476397	1.55594	0.119723	0.256887
Arhgap20	-0.643356	-3.00536	0.00265263	0.00600926	1.36527	4.39549	1.10521e-05	6.86605e-05	0.880802	2.25536	0.0241108	0.0775876
Myo5a	-0.367779	-3.00722	0.00263652	0.00597733	0.924776	5.73754	9.60634e-09	8.9974e-08	0.233131	1.01525	0.309985	0.496652
Arhgef2	-0.422782	-3.01206	0.00259478	0.00589587	0.798984	4.46444	8.02789e-06	5.09964e-05	0.589117	2.74121	0.00612134	0.0259747
Rab3gap2	-0.615528	-3.06037	0.00221062	0.00508323	0.751481	2.84485	0.0044432	0.0152343	0.121182	0.403912	0.686278	0.811834
Basp1	-0.340372	-3.06232	0.00219632	0.00505431	1.17666	7.65599	1.9183e-14	3.21145e-13	1.37708	10.8629	1.73234e-27	1.07776e-25
Plekhg5	-0.445597	-3.16248	0.00156432	0.00370772	1.74374	8.82142	1.13019e-18	2.64637e-17	1.06551	4.8954	9.81052e-07	1.01138e-05
Pip4k2c	-0.401411	-3.21449	0.00130678	0.00313665	1.42413	7.78944	6.73043e-15	1.17707e-13	1.05122	5.72009	1.06467e-08	1.44557e-07
Slmap	-0.524545	-3.24807	0.00116189	0.00281119	0.59149	2.86363	0.00418812	0.0144802	0.591577	2.2713	0.0231288	0.0749289
Tanc1	-0.458187	-3.30563	0.000947648	0.00232558	2.07752	9.76099	1.65529e-22	5.31502e-21	0.919766	3.5813	0.000341889	0.00219247
Chst1	-0.339072	-3.31659	0.000911226	0.0022413	1.00806	7.32081	2.46488e-13	3.72001e-12	1.05139	6.94136	3.88335e-12	7.48248e-11
Tubb3	-0.364093	-3.31941	0.000902093	0.00222172	1.41761	9.30611	1.32597e-20	3.67208e-19	0.360093	2.58295	0.00979586	0.0381492
Rhof	-0.7349	-3.32361	0.000888607	0.00218958	0.954601	3.2864	0.00101476	0.00413054	1.28319	3.07863	0.00207957	0.0104062
Syt5	-0.424417	-3.34556	0.000821157	0.00203499	1.82897	9.95382	2.42693e-23	8.22356e-22	1.85843	8.57384	1.00088e-17	2.95888e-16
Sstr4	-1.00074	-3.40824	0.000653831	0.00164623	1.76879	3.75282	0.000174858	0.00085654	0.531253	0.896948	0.369747	0.558956
Mrtfb	-0.485354	-3.4642	0.000531814	0.0013587	1.49094	7.69378	1.42854e-14	2.43197e-13	0.924227	4.10617	4.0227e-05	0.000319593
Soga3	-0.500649	-3.47651	0.000507977	0.00130264	1.01019	5.0745	3.88526e-07	2.96356e-06	0.858491	3.85775	0.000114434	0.00082621
Kcnj9	-0.646877	-3.47772	0.000505701	0.00129769	1.28203	4.87665	1.079e-06	7.78383e-06	1.14092	3.42605	0.000612432	0.00363133
Hspa1b	-1.02286	-3.52112	0.000429724	0.00111464	1.43414	3.21699	0.00129543	0.00514813	0.755817	1.11605	0.264399	0.446331
Chst15	-0.901103	-3.5224	0.00042766	0.00110986	1.11308	3.29436	0.000986462	0.00403282	0.623331	1.60947	0.107514	0.237439
Dip2c	-0.545902	-3.53519	0.000407486	0.00106115	1.08855	4.96738	6.78632e-07	5.04536e-06	0.546145	2.27983	0.022618	0.0736729
Lpgat1	-0.487008	-3.55456	0.000378612	0.000991766	0.417164	2.36546	0.0180079	0.0495587	0.569124	2.57267	0.0100916	0.0390458
Rrp7a	-0.489322	-3.57212	0.000354101	0.000930463	0.531274	2.94171	0.00326409	0.0116424	0.944878	4.2317	2.31932e-05	0.000190684
Nexmif	-0.779564	-3.57248	0.000353612	0.000929425	1.47672	4.4262	9.59073e-06	6.03531e-05	0.793251	1.5848	0.113011	0.246708
Phf20	-0.450108	-3.58368	0.000338792	0.000893963	0.901515	5.51386	3.51054e-08	3.09472e-07	0.561592	3.2319	0.00122971	0.00668587
Trio	-0.446053	-3.58881	0.000332192	0.000877773	1.65248	8.9422	3.81504e-19	9.24001e-18	0.746456	3.3898	0.000699448	0.00410638
Prss12	-1.12152	-3.59286	0.000327068	0.000865295	2.27809	4.02132	5.7874e-05	0.000315709	1.02791	1.37347	0.169608	0.328015
Klhl23	-0.630492	-3.6273	0.000286399	0.000764524	0.595164	2.67441	0.00748615	0.0237775	0.39522	1.50783	0.131598	0.273771
Arfgap1	-0.583888	-3.6648	0.000247529	0.000667362	0.591973	2.63054	0.00852487	0.0265855	0.747351	2.55258	0.0106929	0.0409039
Slc24a3	-0.384686	-3.66802	0.000244439	0.000659384	1.39094	9.00401	2.17629e-19	5.37251e-18	1.48263	8.1178	4.74703e-16	1.24972e-14
Slit3	-0.658277	-3.69461	0.000220227	0.000599202	2.7473	9.42278	4.39282e-21	1.24841e-19	1.3351	3.1244	0.00178165	0.00913097
Zfyve9	-0.761257	-3.70964	0.00020755	0.000566854	0.968342	3.37894	0.00072767	0.00308488	0.127667	0.406727	0.684209	0.810537
Aldoa	-0.350428	-3.72173	0.000197862	0.000542551	0.82613	6.65184	2.89449e-11	3.55113e-10	0.369147	3.85239	0.000116971	0.00084113
Faah	-0.469939	-3.73834	0.000185237	0.000510152	1.79513	9.50094	2.08e-21	6.10826e-20	1.41304	5.63769	1.72349e-08	2.25442e-07
Ehd3	-0.609326	-3.74417	0.000180991	0.000499096	0.748336	3.54794	0.000388254	0.00175636	0.418425	1.43824	0.150366	0.301769
Dock3	-0.496994	-3.77857	0.000157734	0.000437973	1.23504	6.52818	6.65722e-11	7.87911e-10	0.775457	2.88594	0.00390253	0.0178106
Pex5l	-0.439662	-3.77944	0.000157183	0.000436683	1.40491	9.158	5.28671e-20	1.36988e-18	1.33913	4.69638	2.64817e-06	2.58714e-05
Armcx4	-0.654468	-3.78187	0.000155653	0.000432935	0.790864	3.29965	0.000968039	0.00397364	0.112016	0.319792	0.749126	0.852395
Pde10a	-0.766929	-3.78958	0.000150902	0.000420262	0.912155	3.29497	0.000984315	0.00402638	0.57197	1.51581	0.129567	0.271199
Ccar2	-0.649905	-3.81875	0.000134127	0.000376458	0.59044	2.76848	0.00563184	0.0186353	0.038576	0.165428	0.868607	0.925237
Lpcat4	-0.678798	-3.82265	0.000132026	0.000370835	1.19806	4.78639	1.69805e-06	1.19083e-05	0.806003	2.58826	0.00964614	0.0377425
Slc9a2	-1.02786	-3.83852	0.000123776	0.00034857	1.49693	3.62211	0.000292212	0.00136572	1.65114	2.80998	0.00495452	0.0216252
3300002P13Rik	-0.442319	-3.85986	0.000113452	0.00032135	2.44053	13.9063	5.80423e-44	8.70387e-42	1.98305	7.5485	4.40311e-14	9.81477e-13
Cct7	-0.460855	-3.89951	9.63879e-05	0.000275287	0.742387	4.9168	8.79689e-07	6.41495e-06	0.160479	1.0033	0.315714	0.502483
Lonrf1	-0.872306	-3.93998	8.14887e-05	0.000234551	0.83914	2.69519	0.00703489	0.0225321	0.451787	1.14251	0.253243	0.434409
Trappc12	-0.718769	-3.95819	7.55203e-05	0.000218245	0.793047	3.25798	0.00112208	0.00452556	0.848905	2.9943	0.00275077	0.0132506
Kl	-0.916438	-3.96691	7.28094e-05	0.000211137	1.86397	5.22801	1.71347e-07	1.38097e-06	1.37156	2.98789	0.0028091	0.0134796
Ubald1	-0.565363	-3.98049	6.87746e-05	0.000200244	0.517692	2.76617	0.00567191	0.0187329	1.03026	4.64376	3.42125e-06	3.29605e-05
Agfg2	-0.683488	-3.98269	6.81406e-05	0.000198589	0.736213	3.20067	0.00137108	0.00541062	1.2808	3.87239	0.000107773	0.00078309
Elmo2	-0.521346	-3.99417	6.49204e-05	0.000189753	0.753162	4.57218	4.82666e-06	3.18374e-05	0.544029	2.99813	0.00271646	0.0131004
Coro1a	-0.660028	-4.04108	5.32061e-05	0.000157154	1.12722	5.23822	1.62135e-07	1.31122e-06	0.185623	0.87402	0.382107	0.570878
Syngr3	-0.490697	-4.04644	5.20016e-05	0.000153747	1.23769	7.08968	1.3442e-12	1.89859e-11	0.877216	4.59199	4.39046e-06	4.14987e-05
Zfp385b	-0.93267	-4.05046	5.11177e-05	0.000151311	1.24197	3.62467	0.000289334	0.00135542	0.925056	2.17543	0.0295979	0.0908731
Rae1	-0.871538	-4.05381	5.03905e-05	0.000149363	0.694357	2.40345	0.0162413	0.0454296	0.298416	0.861503	0.388961	0.577598
Nckap1	-0.436315	-4.05752	4.95968e-05	0.000147126	0.956217	6.7555	1.4234e-11	1.79949e-10	0.9219	5.06568	4.06945e-07	4.45608e-06
Pigk	-0.638957	-4.06048	4.89718e-05	0.000145558	1.1888	5.32454	1.01208e-07	8.43164e-07	0.443163	1.73682	0.0824182	0.196387
Igsf8	-0.62255	-4.10534	4.03724e-05	0.00012143	1.03311	6.2935	3.10382e-10	3.44771e-09	0.545692	3.25376	0.00113887	0.00624904
Fam117b	-0.743498	-4.1191	3.80353e-05	0.000114789	0.548751	2.41428	0.0157661	0.0443857	0.646172	2.23074	0.0256981	0.0813556
Kcnab3	-1.45662	-4.1409	3.45942e-05	0.000104823	1.28807	2.36389	0.0180843	0.0497107	0.849902	1.02136	0.307086	0.49334
Pomgnt2	-0.928342	-4.18147	2.89627e-05	8.88452e-05	0.892	2.79565	0.0051796	0.0173508	0.440824	1.08259	0.278992	0.46236
Trim3	-0.617483	-4.23017	2.33519e-05	7.24572e-05	0.803455	3.95546	7.63867e-05	0.000406934	0.853192	3.46206	0.000536051	0.00323675
Cacna1b	-0.624525	-4.24062	2.22907e-05	6.93635e-05	1.15907	5.71598	1.09075e-08	1.01621e-07	0.433523	1.32069	0.186604	0.350382
Hspa1a	-1.39921	-4.24321	2.2035e-05	6.86244e-05	1.34434	2.55734	0.0105478	0.0317085	1.09968	1.57801	0.114564	0.248936
St8sia5	-0.744609	-4.24857	2.15138e-05	6.70981e-05	0.95105	3.78453	0.000153998	0.000765697	0.408722	1.50853	0.13142	0.273764
Ankrd63	-0.749434	-4.25328	2.10658e-05	6.57687e-05	1.83253	6.15365	7.57189e-10	8.06753e-09	2.2653	5.1243	2.98644e-07	3.32255e-06
Fam43b	-0.940148	-4.25623	2.079e-05	6.50015e-05	1.45877	4.16787	3.07463e-05	0.000176826	1.94032	3.61798	0.000296913	0.00193582
Clstn1	-0.387715	-4.26074	2.03748e-05	6.37562e-05	1.55618	11.8176	3.16641e-32	1.85974e-30	0.80847	4.19795	2.69346e-05	0.000219282
Arpc1a	-0.576608	-4.26622	1.98813e-05	6.22763e-05	0.683073	4.40197	1.07274e-05	6.68791e-05	0.525277	3.46637	0.000527531	0.00318993
Minpp1	-0.878857	-4.27514	1.91018e-05	5.99589e-05	0.645873	2.3954	0.0166021	0.0461949	0.793526	2.27433	0.0229462	0.0745085
Car12	-1.50317	-4.29067	1.78132e-05	5.61239e-05	1.64713	2.86865	0.00412234	0.0142702	1.77858	2.35768	0.0183893	0.0628818
Syt3	-0.71334	-4.32883	1.49904e-05	4.76673e-05	1.30212	5.72775	1.01771e-08	9.50673e-08	1.0739	3.2035	0.00135769	0.00727416
Zfp831	-0.970353	-4.37283	1.22646e-05	3.93891e-05	2.45057	6.00996	1.85569e-09	1.88186e-08	1.91572	3.6151	0.000300237	0.00195638
Alox12b	-1.51121	-4.38107	1.18097e-05	3.80574e-05	3.32054	4.48942	7.14183e-06	4.56973e-05	1.71436	1.84865	0.0645083	0.164427
Frmpd4	-0.716598	-4.41007	1.03337e-05	3.3544e-05	1.40182	5.93929	2.86257e-09	2.85366e-08	0.827014	2.08593	0.0369851	0.108845
Nr4a1	-0.655447	-4.41272	1.02081e-05	3.31578e-05	1.18133	5.46938	4.5161e-08	3.91989e-07	1.17561	3.60316	0.000314368	0.00203793
Ets2	-1.05052	-4.44293	8.87439e-06	2.90629e-05	0.996617	2.86993	0.00410558	0.014216	0.562237	1.31001	0.190192	0.355296
Kcnj6	-1.12051	-4.45185	8.51351e-06	2.79294e-05	1.55881	4.16109	3.1673e-05	0.000181415	1.12663	2.57611	0.00999196	0.03872
Adra1d	-0.672932	-4.47512	7.63692e-06	2.51574e-05	2.82509	10.8816	1.41005e-27	6.25035e-26	1.89676	6.24224	4.31359e-10	6.91558e-09
Arhgap26	-0.766651	-4.48769	7.19988e-06	2.37903e-05	0.732549	3.07056	0.00213661	0.00803137	0.424461	1.59434	0.110859	0.243167
P4htm	-0.763136	-4.50478	6.64421e-06	2.20506e-05	0.958788	4.43681	9.13015e-06	5.76607e-05	0.440574	1.82212	0.0684368	0.171641
Nptx1	-0.545106	-4.5121	6.41892e-06	2.13417e-05	2.07646	12.7379	3.6422e-37	3.13051e-35	2.08793	7.91927	2.38917e-15	5.89281e-14
Ubqln2	-0.540149	-4.52057	6.16729e-06	2.05671e-05	1.00117	6.12923	8.83047e-10	9.29607e-09	1.42564	7.30806	2.71019e-13	5.66737e-12
Rogdi	-0.722805	-4.56801	4.92368e-06	1.66253e-05	0.894085	4.30555	1.66572e-05	0.000100385	1.26033	4.83313	1.34405e-06	1.35982e-05
Tmem63b	-0.640595	-4.59711	4.28395e-06	1.45824e-05	0.686225	3.78327	0.00015478	0.000769047	0.119404	0.591833	0.553963	0.714933
Chrm1	-0.510483	-4.61373	3.95503e-06	1.35084e-05	2.30528	14.0712	5.71316e-45	9.25664e-43	1.77639	10.9294	8.34279e-28	5.32278e-26
Ankrd33b	-0.733331	-4.61778	3.87862e-06	1.32624e-05	1.43991	6.06922	1.28534e-09	1.32928e-08	1.61296	4.97024	6.68708e-07	7.04481e-06
Gnaq	-0.51429	-4.62361	3.77117e-06	1.29213e-05	0.587502	4.19097	2.77763e-05	0.000160993	0.69843	5.15179	2.58012e-07	2.9067e-06
Uhrf1bp1l	-0.669349	-4.6329	3.60573e-06	1.23825e-05	1.53799	7.57716	3.53198e-14	5.7557e-13	1.07298	4.54963	5.37415e-06	4.95969e-05
Syt13	-0.630122	-4.6467	3.37293e-06	1.1628e-05	0.728837	4.14794	3.35484e-05	0.000191689	0.709387	2.88438	0.0039219	0.017886
Spryd3	-0.585433	-4.6908	2.72133e-06	9.4986e-06	0.768121	4.5543	5.25597e-06	3.44596e-05	0.612509	3.3479	0.00081427	0.0046687
Creld1	-0.816183	-4.70385	2.55306e-06	8.94222e-06	0.599534	2.75531	0.00586362	0.0192981	0.494267	1.95996	0.0500006	0.136384
Grp	-1.48188	-4.73645	2.1749e-06	7.67639e-06	1.16603	2.42079	0.015487	0.0437396	3.38162	3.28379	0.00102421	0.00570245
Bcl6	-0.946632	-4.7758	1.78995e-06	6.38178e-06	0.94324	3.58697	0.000334536	0.00153503	0.34152	1.09479	0.273607	0.456986
Tubb2a	-0.510086	-4.81491	1.47269e-06	5.28599e-06	1.20472	9.40308	5.29899e-21	1.48794e-19	0.177278	1.62153	0.104904	0.233465
Cdkl5	-1.16669	-4.82771	1.38111e-06	4.97337e-06	1.48971	4.03424	5.47792e-05	0.000300221	0.183197	0.35702	0.721077	0.83535
Ryr2	-0.698622	-4.84772	1.24889e-06	4.5253e-06	1.61263	8.37438	5.55133e-17	1.16968e-15	0.340465	1.23553	0.216632	0.390126
Bdnf	-2.67048	-4.85087	1.22919e-06	4.45817e-06	1.55669	3.17702	0.00148798	0.00583114	1.5016	2.35862	0.018343	0.0627576
Syt16	-0.745541	-4.85102	1.22826e-06	4.45587e-06	0.894209	4.03091	5.55606e-05	0.00030403	1.74434	5.67412	1.39404e-08	1.85452e-07
Rem2	-2.06763	-4.86615	1.13791e-06	4.141e-06	2.01346	2.42346	0.0153736	0.0434718	1.25221	1.13821	0.255034	0.436338
Ripor2	-0.870788	-4.88412	1.03891e-06	3.80088e-06	1.0935	4.20602	2.59908e-05	0.000151328	0.611471	1.76669	0.077281	0.187796
D430041D05Rik	-0.877674	-4.89129	1.00177e-06	3.67567e-06	1.05976	4.55029	5.35724e-06	3.5042e-05	0.593765	2.05899	0.0394956	0.114645
Lrfn2	-1.18693	-4.91027	9.09495e-07	3.35174e-06	1.80891	4.37912	1.19159e-05	7.34765e-05	0.294395	0.696641	0.486028	0.659373
Jph1	-1.26301	-4.91159	9.0343e-07	3.33101e-06	1.1926	3.15488	0.00160564	0.00622642	0.901332	1.91278	0.0557763	0.147991
Atg101	-0.96629	-4.91322	8.95932e-07	3.30659e-06	0.827012	3.1019	0.00192282	0.00731161	0.00136833	0.00444012	0.996457	0.998243
Epha7	-2.40207	-4.91588	8.83856e-07	3.26601e-06	1.46878	5.66875	1.43841e-08	1.32176e-07	0.851184	1.89452	0.0581555	0.152652
Sema4f	-0.949934	-4.94413	7.64863e-07	2.84159e-06	1.60386	5.10872	3.24357e-07	2.50665e-06	0.64285	1.68909	0.0912029	0.211085
Synj2	-0.803869	-4.96291	6.94437e-07	2.59187e-06	1.4103	5.73803	9.57863e-09	8.97742e-08	0.514716	1.84324	0.0652942	0.165788
Myo5b	-0.852858	-5.04616	4.50787e-07	1.71392e-06	1.62497	6.37201	1.86572e-10	2.11239e-09	1.82609	4.84236	1.28305e-06	1.30127e-05
Grm1	-1.02624	-5.08891	3.60121e-07	1.38347e-06	0.77533	3.02225	0.00250902	0.00923424	0.171236	0.532468	0.594402	0.745923
Sez6l	-0.560867	-5.10255	3.35108e-07	1.29065e-06	2.03467	13.6752	1.42729e-42	2.05297e-40	1.35899	5.90829	3.45667e-09	4.99719e-08
Rtn4rl1	-0.763549	-5.13376	2.8401e-07	1.1054e-06	1.97232	9.30532	1.33589e-20	3.69231e-19	1.08256	4.01579	5.9247e-05	0.000455368
Bod1l	-0.798038	-5.168	2.36615e-07	9.26421e-07	0.543489	2.72529	0.00642456	0.0208473	0.152914	0.708781	0.47846	0.65394
Grm5	-0.641765	-5.19745	2.02044e-07	7.96751e-07	1.98382	11.8281	2.79376e-32	1.66164e-30	1.38984	5.86444	4.50651e-09	6.41844e-08
Hapln4	-0.827286	-5.24288	1.58086e-07	6.30217e-07	1.5373	6.55697	5.49129e-11	6.56533e-10	1.53147	4.88632	1.0274e-06	1.05655e-05
Acot7	-0.614869	-5.27739	1.31039e-07	5.25999e-07	1.00235	5.92458	3.131e-09	3.11465e-08	0.638254	3.72731	0.000193533	0.00131744
Ndn	-0.715478	-5.28086	1.28576e-07	5.16524e-07	0.7087	3.94286	8.05169e-05	0.000427483	0.182356	0.863821	0.387686	0.576459
Lypd1	-0.878669	-5.31045	1.09354e-07	4.41182e-07	1.0816	4.97233	6.61524e-07	4.92596e-06	2.22426	4.14103	3.45752e-05	0.000277333
Sqstm1	-0.601565	-5.36454	8.11562e-08	3.3113e-07	0.392295	2.77541	0.00551314	0.0182855	0.0680404	0.485802	0.627107	0.770938
Atp6v0d1	-0.628918	-5.39778	6.74717e-08	2.76639e-07	0.46342	2.95464	0.00313033	0.0112306	0.241881	1.47573	0.140017	0.285624
Htr1a	-0.959605	-5.43426	5.50254e-08	2.27958e-07	1.69331	6.18472	6.22133e-10	6.68924e-09	1.78184	4.70107	2.588e-06	2.53231e-05
Kcnf1	-1.08636	-5.44677	5.1292e-08	2.13251e-07	1.75589	5.25341	1.4931e-07	1.21447e-06	1.69185	3.79339	0.000148603	0.00104456
D130043K22Rik	-1.65374	-5.47952	4.26479e-08	1.79086e-07	1.82926	3.14547	0.00165821	0.00640303	1.29752	1.55063	0.12099	0.258695
Tenm2	-0.653263	-5.48674	4.09413e-08	1.7235e-07	2.30738	13.537	9.4612e-42	1.18022e-39	1.28053	4.38494	1.16017e-05	0.000100942
Asap1	-0.867464	-5.48795	4.06629e-08	1.71226e-07	0.550409	2.58296	0.00979558	0.0298548	0.600165	2.04533	0.0408228	0.117516
Hyou1	-0.769505	-5.5468	2.90945e-08	1.23859e-07	0.707929	3.81413	0.000136662	0.000687749	0.299798	1.36459	0.172382	0.331586
Dnajc6	-0.736579	-5.56868	2.5668e-08	1.09953e-07	1.22854	6.74335	1.54773e-11	1.94966e-10	0.474232	1.96323	0.049619	0.135507
Lemd3	-1.25009	-5.57476	2.47865e-08	1.06388e-07	0.86426	2.5389	0.0111201	0.0331323	0.376594	0.894201	0.371214	0.560294
Rtn4r	-1.06069	-5.5799	2.40656e-08	1.03381e-07	2.21988	8.18396	2.74655e-16	5.40718e-15	1.66829	5.07535	3.86782e-07	4.25018e-06
Magee1	-0.733393	-5.58306	2.3632e-08	1.01606e-07	1.40119	7.25234	4.09623e-13	6.06518e-12	0.447635	1.91971	0.0548939	0.146364
Wscd2	-0.852738	-5.62903	1.81226e-08	7.8521e-08	1.77989	7.63186	2.31382e-14	3.83262e-13	1.55224	5.37832	7.51831e-08	9.15447e-07
Nt5dc3	-0.756359	-5.63906	1.70985e-08	7.42326e-08	1.06593	5.10927	3.23411e-07	2.50072e-06	0.579875	2.59467	0.00946814	0.0371507
Nck2	-1.15498	-5.73183	9.93521e-09	4.39154e-08	0.795308	2.67189	0.00754247	0.0239143	0.574456	1.45878	0.144627	0.292884
Trim2	-0.624901	-5.74291	9.30633e-09	4.12805e-08	0.589476	4.49205	7.05405e-06	4.51767e-05	0.919967	5.93179	2.99652e-09	4.35715e-08
Wdr7	-0.735371	-5.74627	9.12352e-09	4.05409e-08	1.13999	6.3073	2.83953e-10	3.17415e-09	0.326392	1.19842	0.230755	0.408145
Rtf1	-0.698604	-5.76512	8.15995e-09	3.64306e-08	1.0836	6.25979	3.85507e-10	4.23216e-09	0.221439	1.12989	0.258521	0.439837
Hspa8	-0.505475	-5.77469	7.70951e-09	3.45318e-08	0.759073	6.25244	4.041e-10	4.42939e-09	0.050431	0.51229	0.608448	0.756101
Hsp90ab1	-0.51951	-5.77503	7.69372e-09	3.44713e-08	1.00072	8.00935	1.15319e-15	2.15019e-14	0.543175	4.49851	6.84316e-06	6.19651e-05
Cyld	-0.893944	-5.7898	7.04704e-09	3.17148e-08	0.667321	3.24537	0.00117296	0.0047119	0.583123	1.94107	0.05225	0.14112
Prkca	-0.710302	-5.8165	6.0092e-09	2.72387e-08	1.15474	7.01308	2.33126e-12	3.19044e-11	0.522573	2.32724	0.0199527	0.0668909
Dnm1	-0.542089	-5.83869	5.26137e-09	2.39928e-08	1.64075	12.5793	2.74546e-36	2.22413e-34	0.991869	6.97881	2.97695e-12	5.81668e-11
Chst8	-1.42996	-5.93377	2.96058e-09	1.38005e-08	1.22653	3.31011	0.000932603	0.00385173	0.580395	1.12133	0.262146	0.443892
Ntrk3	-0.849731	-5.95608	2.58359e-09	1.2073e-08	1.18021	5.3191	1.04281e-07	8.66716e-07	0.940997	3.73692	0.00018629	0.00127438
Ttc19	-1.00903	-5.95753	2.56082e-09	1.19703e-08	0.555076	2.39941	0.0164215	0.0458009	0.14024	0.536786	0.591415	0.743565
Htr5b	-1.60605	-6.00443	1.92001e-09	9.04763e-09	1.88382	4.04631	5.20314e-05	0.00028661	2.7958	3.29321	0.000990498	0.00553449
Galnt18	-1.19665	-6.02893	1.6505e-09	7.81642e-09	1.46838	4.83091	1.35913e-06	9.62242e-06	0.826296	2.32153	0.0202584	0.0676632
Tmem179	-0.801761	-6.03451	1.59443e-09	7.55342e-09	0.968773	5.566	2.60647e-08	2.32832e-07	1.03726	4.91465	8.89419e-07	9.22237e-06
Epha6	-1.0255	-6.09777	1.07561e-09	5.15374e-09	1.70826	6.18452	6.22936e-10	6.69276e-09	0.469908	1.50784	0.131596	0.273771
Scamp5	-0.633839	-6.13763	8.3761e-10	4.0493e-09	0.538171	3.77922	0.000157322	0.0007801	0.601458	4.20774	2.57934e-05	0.000210265
Stk25	-0.71396	-6.19473	5.83836e-10	2.85997e-09	0.490391	3.12592	0.00177251	0.00679503	0.555154	3.55652	0.000375806	0.00238309
Evc2	-1.18458	-6.22913	4.69038e-10	2.31941e-09	1.11797	3.78332	0.000154749	0.000769047	0.733261	2.03994	0.0413558	0.118722
Chrm4	-1.65762	-6.23324	4.56875e-10	2.26149e-09	1.68605	3.60507	0.000312072	0.00144312	0.83307	1.47826	0.139338	0.28478
Madd	-0.775048	-6.25858	3.88506e-10	1.93638e-09	1.46386	8.41888	3.8011e-17	8.0937e-16	0.519778	2.99347	0.00275825	0.0132712
Amph	-0.79084	-6.2847	3.28496e-10	1.64651e-09	1.00569	5.80376	6.48444e-09	6.19693e-08	1.68796	6.67748	2.43082e-11	4.35493e-10
Baiap2	-0.691422	-6.28969	3.18109e-10	1.59603e-09	2.26809	14.2794	2.94133e-46	4.9953e-44	2.45763	14.0416	8.67219e-45	1.86975e-42
Caly	-1.07884	-6.32831	2.4786e-10	1.25231e-09	1.24773	6.75109	1.46739e-11	1.85343e-10	1.50738	5.58568	2.3279e-08	3.01662e-07
Slc7a14	-1.04668	-6.36331	1.97457e-10	1.00572e-09	1.03918	5.01627	5.2683e-07	3.96064e-06	0.306536	1.13614	0.255899	0.437161
Map2k1	-0.845685	-6.36356	1.97136e-10	1.00509e-09	1.05952	6.19251	5.92147e-10	6.37655e-09	0.753556	4.05772	4.95549e-05	0.000386819
Atp1a1	-0.880702	-6.40733	1.48093e-10	7.63126e-10	1.49611	9.26287	1.99003e-20	5.40489e-19	0.857239	4.2122	2.52892e-05	0.000206424
Vgf	-0.781395	-6.45385	1.09044e-10	5.69206e-10	1.84312	11.5138	1.12368e-30	5.97714e-29	1.35862	7.10098	1.23874e-12	2.48642e-11
Celf1	-0.751979	-6.45601	1.07501e-10	5.61538e-10	0.574398	3.59364	0.000326088	0.00150165	0.386577	2.31054	0.0208584	0.0691317
Rnf150	-1.01535	-6.46678	1.00115e-10	5.25317e-10	0.899525	3.63698	0.000275853	0.00129917	0.519152	1.78893	0.0736254	0.181138
Grm7	-1.74091	-6.47409	9.53834e-11	5.01883e-10	1.51313	3.30087	0.000963839	0.00395755	0.228665	0.460328	0.645281	0.783345
Lancl1	-0.929999	-6.48537	8.85163e-11	4.67214e-10	0.733144	3.92045	8.83853e-05	0.000464707	0.130069	0.645136	0.518839	0.687588
Kcns2	-1.59632	-6.48645	8.78822e-11	4.64029e-10	1.34439	3.40812	0.000654122	0.00280208	0.270695	0.621681	0.534152	0.698844
Erc2	-1.07243	-6.50422	7.80979e-11	4.1556e-10	0.60554	2.55298	0.0106805	0.0320528	1.90155	5.41918	5.98734e-08	7.37653e-07
Pnmal1	-1.29912	-6.52445	6.8251e-11	3.64834e-10	1.26644	4.01347	5.98313e-05	0.000325505	1.15627	2.81147	0.00493163	0.0215479
Ahi1	-0.800376	-6.58204	4.64022e-11	2.50433e-10	0.730312	4.28159	1.8556e-05	0.000110786	0.316783	1.63622	0.101794	0.228739
Wnt2	-2.27276	-6.60069	4.09253e-11	2.21745e-10	2.20676	3.06727	0.00216026	0.00810299	1.31049	1.32059	0.186639	0.350382
Tmem130	-0.836492	-6.60911	3.86636e-11	2.09867e-10	0.521388	2.97012	0.00297682	0.01074	0.0234658	0.124469	0.900944	0.943655
Cpne6	-0.761312	-6.67579	2.4591e-11	1.3607e-10	1.99629	12.1582	5.19092e-34	3.51785e-32	1.2518	6.87377	6.25289e-12	1.18294e-10
Efcab6	-1.90437	-6.69695	2.12819e-11	1.18279e-10	1.28845	2.69252	0.00709153	0.0226723	2.26954	2.80089	0.00509614	0.0221198
Gpr158	-1.07529	-6.70271	2.04593e-11	1.13833e-10	0.746684	3.34782	0.0008145	0.00341499	0.350004	1.14866	0.250694	0.431274
Ak5	-1.06155	-6.72186	1.79417e-11	1.00194e-10	1.53307	7.14098	9.26707e-13	1.33279e-11	1.69459	5.13755	2.78342e-07	3.1133e-06
Pip5k1a	-1.291	-6.72544	1.75064e-11	9.78351e-11	0.775086	2.97283	0.00295066	0.0106593	0.468264	1.4346	0.1514	0.302873
Pkp2	-1.70042	-6.72677	1.73475e-11	9.6983e-11	1.74401	3.68001	0.000233229	0.00111368	1.4153	2.18452	0.0289238	0.0891967
Ina	-0.911955	-6.74241	1.55782e-11	8.73176e-11	0.806146	3.86418	0.000111465	0.000573015	1.37607	4.39287	1.11867e-05	9.74158e-05
Rnf112	-0.825516	-6.77181	1.27185e-11	7.16609e-11	2.03584	10.7916	3.77305e-27	1.59714e-25	1.55126	7.35598	1.89537e-13	4.03088e-12
Ica1	-1.66499	-6.81174	9.64283e-12	5.4801e-11	1.03034	2.58588	0.00971319	0.0296486	0.183328	0.410279	0.681601	0.808674
Crtac1	-1.12892	-6.85376	7.1936e-12	4.11915e-11	1.20316	5.10616	3.28765e-07	2.53655e-06	0.164662	0.658608	0.510148	0.680006
Syt12	-1.20871	-6.86845	6.49042e-12	3.73205e-11	1.60498	5.62222	1.88517e-08	1.7111e-07	1.38475	3.21004	0.00132716	0.00714121
Ptprj	-1.04128	-6.90335	5.07888e-12	2.94166e-11	0.769359	4.08899	4.3325e-05	0.000241865	0.474506	2.30346	0.0212529	0.0702532
Drd5	-1.84561	-6.90984	4.85212e-12	2.81248e-11	2.02545	4.14268	3.43266e-05	0.000195581	2.22083	2.97884	0.00289346	0.0138286
Fam234b	-0.744904	-6.94278	3.8445e-12	2.24177e-11	0.600387	4.11253	3.91353e-05	0.000220132	0.565519	3.71034	0.000206981	0.00139983
Got2	-0.857632	-6.98635	2.82136e-12	1.66344e-11	0.858798	5.20359	1.95474e-07	1.55673e-06	0.434059	2.54979	0.0107787	0.041207
Fbxo34	-1.73359	-7.07746	1.46825e-12	8.79034e-12	1.17892	2.84571	0.0044313	0.0152091	1.08706	1.87539	0.0607391	0.157264
Ano3	-1.46367	-7.08236	1.41722e-12	8.49826e-12	2.25207	6.87959	6.00234e-12	7.86328e-11	1.76789	3.78482	0.000153822	0.00107822
Dpp6	-0.828877	-7.10197	1.22989e-12	7.40435e-12	1.29882	8.42302	3.66889e-17	7.824e-16	1.01437	5.6898	1.27186e-08	1.70285e-07
Grin2a	-1.08312	-7.10223	1.22757e-12	7.39329e-12	2.44535	9.10854	8.35009e-20	2.11316e-18	0.725738	1.52267	0.127841	0.268636
Grin2b	-0.895952	-7.10989	1.16132e-12	7.00268e-12	1.7133	8.97402	2.85889e-19	7.02072e-18	0.92543	4.94046	7.79386e-07	8.14902e-06
D630045J12Rik	-1.15243	-7.12671	1.02794e-12	6.21576e-12	0.803101	3.30302	0.000956495	0.00393427	0.38401	1.18876	0.234534	0.412285
Brinp2	-1.17942	-7.1281	1.01761e-12	6.15574e-12	1.04861	4.20067	2.66123e-05	0.000154628	0.924312	2.96951	0.00298272	0.014213
Kcna4	-1.86985	-7.14135	9.24186e-13	5.60631e-12	1.7899	3.63832	0.000274425	0.00129288	0.862566	1.49894	0.133889	0.277154
Slc6a7	-1.55652	-7.16521	7.76663e-13	4.72848e-12	0.843661	2.44747	0.0143865	0.0411676	0.870174	2.0858	0.0369972	0.108845
Ptprn2	-0.763662	-7.21587	5.3589e-13	3.29043e-12	1.26537	7.48456	7.17892e-14	1.12814e-12	0.894222	3.63369	0.000279398	0.00182925
Rbfox1	-0.823489	-7.24441	4.34325e-13	2.69086e-12	1.95443	12.6736	8.28133e-37	6.86668e-35	2.04753	12.6842	7.23218e-37	9.32355e-35
Plcl2	-1.09446	-7.25539	4.00497e-13	2.48535e-12	0.689013	3.19752	0.00138617	0.00546405	0.704391	2.59085	0.00957397	0.037507
Klhl2	-0.831315	-7.27885	3.3667e-13	2.10409e-12	0.702104	4.36517	1.27024e-05	7.80189e-05	1.12168	5.47952	4.26481e-08	5.34919e-07
Dapk1	-0.915944	-7.31173	2.63723e-13	1.65767e-12	1.82108	9.42167	4.43954e-21	1.25915e-19	0.617774	2.84908	0.00438463	0.0195751
Elmod1	-2.4804	-7.33424	2.22979e-13	1.40978e-12	0.879687	3.71918	0.00019987	0.000966174	0.880537	3.03681	0.00239094	0.0117204
Hcn1	-1.14473	-7.34324	2.08487e-13	1.32091e-12	0.990884	4.45858	8.25049e-06	5.23162e-05	0.410297	1.51837	0.128921	0.270225
Nudcd3	-0.931074	-7.34839	2.00601e-13	1.27148e-12	0.504868	2.71588	0.0066099	0.0213406	0.668803	3.13816	0.00170013	0.00877429
Igfbp4	-0.991697	-7.37885	1.59665e-13	1.01671e-12	0.973764	4.68579	2.78885e-06	1.90463e-05	1.37373	5.7231	1.04597e-08	1.42172e-07
Ttc3	-0.721907	-7.37973	1.58617e-13	1.01045e-12	0.831357	6.2853	3.27225e-10	3.62623e-09	0.887944	4.67878	2.88591e-06	2.80624e-05
Sidt1	-1.58654	-7.38547	1.5192e-13	9.69839e-13	1.63095	4.77883	1.76314e-06	1.2328e-05	1.41338	3.07516	0.00210388	0.0105018
Tmem59l	-0.779671	-7.44081	1.00068e-13	6.4591e-13	1.91067	12.4104	2.2943e-35	1.73873e-33	1.12143	7.53049	5.05492e-14	1.11879e-12
Kif3a	-1.27869	-7.47724	7.59012e-14	4.93081e-13	0.561756	2.38837	0.0169232	0.0469702	0.295464	0.956216	0.338963	0.526761
Cacna1e	-0.927539	-7.52254	5.37205e-14	3.53084e-13	2.46613	11.0511	2.16639e-28	1.00452e-26	0.92951	3.33477	0.000853704	0.00486831
Stxbp5	-1.19938	-7.53394	4.9231e-14	3.24281e-13	0.715549	3.14212	0.00167728	0.00647042	0.117771	0.445425	0.656013	0.790845
Plppr5	-1.48667	-7.55467	4.19915e-14	2.77805e-13	0.77636	2.40028	0.0163823	0.0457097	0.16679	0.460992	0.644805	0.782919
Zfp804a	-2.14268	-7.57022	3.72598e-14	2.4715e-13	1.96986	3.59005	0.000330612	0.0015195	0.172525	0.322127	0.747356	0.851078
St8sia1	-1.36032	-7.58715	3.27015e-14	2.17583e-13	1.08525	3.88535	0.000102182	0.000529933	0.558956	1.82082	0.0686344	0.172033
Aff4	-1.01595	-7.6524	1.97256e-14	1.33181e-13	0.490336	2.77788	0.00547147	0.0181643	0.0294856	0.168927	0.865854	0.923246
Epha4	-2.55893	-7.67357	1.67268e-14	1.13339e-13	1.45182	5.79848	6.69187e-09	6.37786e-08	0.533282	1.76949	0.0768126	0.186912
Tnfrsf21	-1.0369	-7.68899	1.48303e-14	1.00669e-13	0.648695	3.52386	0.000425312	0.00190384	0.523205	2.39995	0.0163974	0.0574207
Kif21a	-0.925834	-7.69837	1.37809e-14	9.36297e-14	0.6667	3.78997	0.000150664	0.000750443	0.135474	0.849075	0.39584	0.584877
Luzp1	-1.17686	-7.7184	1.17802e-14	8.0289e-14	0.631639	2.91502	0.00355666	0.0125651	0.374204	1.48336	0.137978	0.283179
Penk	-1.49606	-7.72941	1.08042e-14	7.37368e-14	1.39262	5.28338	1.2682e-07	1.04237e-06	1.58442	3.90939	9.25285e-05	0.000682234
Trim32	-1.04007	-7.76421	8.2155e-15	5.64773e-14	0.818584	4.2257	2.382e-05	0.000139436	0.883747	3.71443	0.00020366	0.00137962
Noct	-1.55791	-7.79801	6.28929e-15	4.35725e-14	0.790183	2.65517	0.00792681	0.0249411	0.665941	1.75427	0.0793844	0.19142
Tesc	-1.68065	-7.80761	5.82819e-15	4.04521e-14	1.1809	3.42395	0.000617183	0.00266151	2.26413	3.83543	0.000125344	0.000893119
Snurf	-0.790618	-7.82367	5.13066e-15	3.57915e-14	0.369824	2.69421	0.00705558	0.022583	1.35626	9.63488	5.69568e-22	2.43087e-20
Plpp6	-1.26477	-7.88398	3.17109e-15	2.23172e-14	0.643056	2.78521	0.00534938	0.0178109	1.61802	4.08051	4.49371e-05	0.000353405
Pip5k1b	-1.70422	-7.88599	3.12053e-15	2.19921e-14	0.900554	2.725	0.0064301	0.0208605	1.45364	3.00162	0.00268544	0.0129708
Foxp1	-1.00603	-7.92459	2.28898e-15	1.62606e-14	1.28118	6.92861	4.24981e-12	5.66213e-11	0.576323	3.2594	0.00111647	0.00613959
Chga	-1.04899	-7.95328	1.81644e-15	1.29585e-14	1.06925	5.74827	9.01608e-09	8.47836e-08	1.3002	5.55168	2.82936e-08	3.63629e-07
Ckmt1	-1.0965	-7.99807	1.2638e-15	9.08893e-15	0.476144	2.41829	0.0155938	0.0439885	0.625465	2.59784	0.00938124	0.0368675
Slc2a3	-1.24322	-8.015	1.10141e-15	7.95128e-15	0.894545	3.99426	6.48962e-05	0.000350525	0.588215	2.24278	0.0249108	0.0794465
Hunk	-1.4597	-8.05505	7.94433e-16	5.77377e-15	1.09431	3.88998	0.000100253	0.000520693	0.715233	2.18365	0.0289879	0.0893722
Stim2	-1.07887	-8.14879	3.67571e-16	2.72514e-15	1.62401	7.76269	8.31456e-15	1.44516e-13	1.33292	5.07873	3.79961e-07	4.1789e-06
L1cam	-1.11291	-8.15184	3.58435e-16	2.66002e-15	1.28837	6.4059	1.49485e-10	1.71173e-09	0.710889	2.35916	0.0183163	0.0626835
Camsap2	-1.08638	-8.18459	2.73232e-16	2.04376e-15	0.6863	3.82939	0.00012846	0.000652058	0.480078	1.78069	0.0749634	0.183699
Crmp1	-0.895241	-8.2036	2.33293e-16	1.75022e-15	1.43232	8.16077	3.32895e-16	6.44572e-15	1.14895	5.81009	6.24392e-09	8.71431e-08
Lratd1	-1.22815	-8.26103	1.44424e-16	1.09491e-15	1.44574	6.14892	7.80123e-10	8.28682e-09	1.38819	4.52179	6.13194e-06	5.61757e-05
Lin7b	-1.62911	-8.26459	1.40176e-16	1.06431e-15	1.14619	3.82419	0.000131201	0.000664059	1.75665	3.77005	0.000163218	0.0011377
Rrp1	-1.17193	-8.35743	6.40996e-17	4.94619e-16	0.389788	2.40734	0.0160693	0.0450316	0.591258	3.45984	0.000540487	0.00325948
Itm2c	-0.91939	-8.3666	5.93044e-17	4.5857e-16	0.7957	6.34218	2.26532e-10	2.55456e-09	0.448678	3.85075	0.000117755	0.000845305
Elovl4	-1.61937	-8.41947	3.78188e-17	2.96836e-16	0.758765	2.63951	0.0083027	0.0259789	0.312303	0.975002	0.329559	0.517145
Rgs7bp	-0.965199	-8.44581	3.01941e-17	2.37732e-16	0.589463	3.73592	0.000187028	0.000910029	0.931436	4.34655	1.38296e-05	0.000118451
Slitrk5	-1.30277	-8.45997	2.67453e-17	2.11017e-16	1.23595	5.49328	3.9453e-08	3.46498e-07	0.564641	1.86304	0.0624573	0.160376
Satb2	-2.24277	-8.47119	2.42891e-17	1.92039e-16	1.99535	3.68749	0.000226475	0.00108401	0.594422	0.944029	0.345155	0.532991
Galnt9	-1.05861	-8.47636	2.32341e-17	1.83986e-16	2.42285	11.5066	1.22216e-30	6.47654e-29	2.15501	8.61913	6.74665e-18	2.02319e-16
Junb	-1.63339	-8.51114	1.72237e-17	1.37617e-16	1.46758	4.90478	9.35322e-07	6.78205e-06	1.2399	3.16855	0.00153203	0.00801591
Sprn	-1.28532	-8.51309	1.69362e-17	1.35391e-16	1.30107	7.34625	2.03843e-13	3.10299e-12	1.6322	7.33552	2.20869e-13	4.65762e-12
Prrt2	-1.07687	-8.5143	1.67599e-17	1.34052e-16	1.50458	8.86626	7.56417e-19	1.78601e-17	2.23786	10.0652	7.87282e-24	3.64628e-22
Cds1	-1.39368	-8.68069	3.93365e-18	3.25479e-17	0.938289	4.17674	2.95711e-05	0.000170694	1.02728	3.50417	0.00045804	0.00283322
Ppp1r12a	-1.40467	-8.6941	3.49597e-18	2.89899e-17	0.588701	2.42968	0.0151121	0.0428611	0.439726	1.58638	0.112654	0.246239
Adgrl2	-1.56228	-8.69616	3.43303e-18	2.84836e-17	0.826174	2.90819	0.00363522	0.0128169	0.126943	0.418259	0.675758	0.804412
Dnajb5	-1.31994	-8.79188	1.47074e-18	1.24765e-17	1.17445	5.49077	4.00178e-08	3.50803e-07	0.953315	3.7632	0.000167752	0.00116218
Mchr1	-2.23673	-8.84009	9.56416e-19	8.18694e-18	1.23109	2.62688	0.00861716	0.026814	0.919524	1.44385	0.148781	0.29931
Pcdhac2	-1.74484	-8.85298	8.52108e-19	7.31477e-18	0.742697	2.52642	0.0115231	0.0341597	0.262846	0.65846	0.510242	0.680015
Homer1	-1.3631	-8.87297	7.12202e-19	6.14869e-18	1.04851	4.64481	3.40391e-06	2.30017e-05	1.13168	4.31257	1.61368e-05	0.000136807
Snap47	-1.19566	-8.88505	6.38914e-19	5.52543e-18	0.794259	4.93331	8.08494e-07	5.93569e-06	0.106619	0.626807	0.530786	0.696168
Plxna2	-1.39727	-8.93657	4.01427e-19	3.49964e-18	1.22151	4.63988	3.48613e-06	2.35347e-05	0.0831332	0.359683	0.719085	0.833898
Galnt17	-1.15098	-8.94918	3.5814e-19	3.12948e-18	2.08232	11.5349	8.80213e-31	4.75382e-29	1.78833	7.44539	9.66618e-14	2.10218e-12
Eno2	-0.854637	-8.9584	3.29419e-19	2.88518e-18	1.93492	12.4875	8.73158e-36	6.87599e-34	1.13749	7.50887	5.96387e-14	1.313e-12
Stxbp1	-0.929275	-8.96521	3.09687e-19	2.71708e-18	0.706031	4.9107	9.07539e-07	6.59756e-06	0.450096	2.92153	0.00348319	0.0161743
Calb1	-1.85221	-9.00662	2.12507e-19	1.87425e-18	0.878978	3.32422	0.000886659	0.00367707	1.87903	4.86922	1.12041e-06	1.1456e-05
Osbpl6	-1.79316	-9.07396	1.14767e-19	1.02296e-18	0.814725	2.49732	0.0125135	0.0366717	0.814755	1.76212	0.0780483	0.189088
Map9	-1.62711	-9.10712	8.45957e-20	7.57154e-19	0.722112	2.89618	0.00377733	0.0132418	0.374349	0.978641	0.327757	0.515286
Adcy9	-1.12273	-9.12427	7.22212e-20	6.47934e-19	1.9232	9.16067	5.15739e-20	1.33883e-18	1.08246	4.86609	1.13825e-06	1.16289e-05
Large1	-1.16253	-9.14206	6.12733e-20	5.51022e-19	1.14172	6.13596	8.46439e-10	8.94408e-09	0.842853	3.21311	0.00131306	0.00707448
Maged1	-1.01055	-9.19259	3.83489e-20	3.45895e-19	0.565496	4.06359	4.83244e-05	0.00026734	0.593644	3.36084	0.000777049	0.00449029
Kcnip4	-2.17086	-9.206	3.38506e-20	3.06603e-19	1.23076	3.33412	0.000855705	0.00356864	1.68113	3.05643	0.00223992	0.0110513
Prkar1a	-0.97711	-9.23739	2.52588e-20	2.30578e-19	0.438617	3.02817	0.00246041	0.00908141	0.369884	2.78237	0.00539628	0.0232691
Ptk2b	-0.951326	-9.27159	1.83396e-20	1.68024e-19	2.68606	18.9276	6.75892e-80	1.0586e-76	1.49079	8.70957	3.05021e-18	9.51195e-17
Nbea	-1.01742	-9.34599	9.10312e-21	8.44244e-20	1.46721	8.59236	8.51989e-18	1.90932e-16	1.05458	4.0493	5.13704e-05	0.000399166
Stmn3	-0.987141	-9.37482	6.92912e-21	6.45792e-20	0.749751	5.19381	2.06029e-07	1.63432e-06	0.987789	6.19301	5.90259e-10	9.35512e-09
Lrrn2	-0.976591	-9.38436	6.33011e-21	5.90693e-20	2.35708	14.1718	1.36971e-45	2.2985e-43	1.32413	6.16988	6.83401e-10	1.06425e-08
Ndrg3	-1.05172	-9.51958	1.73879e-21	1.6689e-20	0.654262	4.55675	5.1951e-06	3.41399e-05	0.671899	3.99336	6.51449e-05	0.000497033
Dgkg	-1.11364	-9.54563	1.35288e-21	1.30181e-20	1.71182	10.4313	1.78385e-25	6.88908e-24	1.40645	7.05579	1.71619e-12	3.4011e-11
Cck	-0.936646	-9.56798	1.09012e-21	1.053e-20	1.32324	8.43178	3.40437e-17	7.3041e-16	1.93716	9.58653	9.11006e-22	3.83573e-20
Nrgn	-0.950425	-9.56872	1.08235e-21	1.04615e-20	1.64401	12.8973	4.65987e-38	4.2653e-36	3.11101	13.6869	1.21551e-42	2.23529e-40
Arel1	-1.22309	-9.63501	5.68849e-22	5.5551e-21	0.988637	5.53566	3.10066e-08	2.75059e-07	0.535373	2.53175	0.0113495	0.0429612
Myh10	-1.29138	-9.70107	2.98339e-22	2.93811e-21	0.684382	3.4369	0.000588407	0.00255441	0.387134	1.49276	0.1355	0.279587
Tmem200a	-2.27146	-9.73049	2.23519e-22	2.21134e-21	1.84483	4.03821	5.38613e-05	0.000295765	0.342788	0.719551	0.471801	0.648908
Inka2	-1.47112	-9.73475	2.14346e-22	2.12337e-21	0.862126	4.04616	5.20644e-05	0.00028668	1.25719	4.17731	2.94975e-05	0.000238594
Lrrtm1	-1.63696	-9.73508	2.13646e-22	2.11783e-21	1.89323	8.22252	1.99269e-16	3.99559e-15	1.04351	3.64526	0.000267117	0.0017562
Ppfia2	-1.86649	-9.80369	1.08551e-22	1.09107e-21	0.645255	2.46581	0.0136703	0.0394789	0.678617	1.7266	0.0842394	0.199246
Nptx2	-1.63047	-9.8234	8.92833e-23	8.99197e-22	1.84648	6.27846	3.41951e-10	3.78347e-09	2.07363	4.28588	1.82014e-05	0.00015245
Chrm3	-2.03016	-9.85662	6.41712e-23	6.5281e-22	1.93668	5.2893	1.22786e-07	1.01039e-06	0.845247	1.94648	0.0515975	0.139871
Thy1	-0.990724	-9.92211	3.33625e-23	3.44731e-22	0.963564	7.11419	1.12568e-12	1.60441e-11	1.14726	8.73661	2.40214e-18	7.56643e-17
Ndrg4	-1.02204	-9.97651	1.93145e-23	2.01086e-22	0.916	6.85722	7.02119e-12	9.14702e-11	0.468154	3.31549	0.00091484	0.00516949
Slitrk3	-2.28896	-9.98156	1.83558e-23	1.91369e-22	1.07199	3.3312	0.000864728	0.00359988	0.286085	0.781792	0.434337	0.617656
Ppp3ca	-0.973543	-9.99933	1.53428e-23	1.60621e-22	1.97331	14.9501	1.55487e-50	3.65291e-48	1.77483	11.5418	8.11633e-31	6.63364e-29
Rprml	-1.71022	-10.0288	1.1392e-23	1.19759e-22	1.84523	7.26052	3.85603e-13	5.72154e-12	2.92033	5.65025	1.6021e-08	2.10076e-07
Cadm3	-1.15461	-10.0521	8.99718e-24	9.50457e-23	0.933337	5.91911	3.23685e-09	3.20862e-08	0.894357	5.17459	2.28406e-07	2.60367e-06
Hsp90aa1	-1.07356	-10.1543	3.17035e-24	3.42819e-23	0.926338	6.74016	1.58209e-11	1.98762e-10	0.176886	1.28329	0.19939	0.367483
Myt1l	-1.17428	-10.1611	2.95721e-24	3.20001e-23	0.535074	3.52592	0.00042202	0.00189249	1.25452	6.18991	6.01968e-10	9.49258e-09
Pcdh20	-2.34774	-10.2173	1.65947e-24	1.81522e-23	0.928514	2.57033	0.0101601	0.0307927	0.384101	0.894394	0.371111	0.560206
Cacna2d3	-1.65963	-10.3045	6.72446e-25	7.47453e-24	0.995622	3.91467	9.05275e-05	0.000474907	0.0429782	0.164206	0.869569	0.925444
Rab3a	-1.31473	-10.3208	5.67631e-25	6.32808e-24	0.880523	5.80753	6.34015e-09	6.06726e-08	0.35399	2.12061	0.0339543	0.101385
Kifap3	-1.38346	-10.3544	3.9988e-25	4.47445e-24	0.596534	3.2224	0.00127119	0.00506322	0.304178	1.43732	0.150628	0.302054
Prkcg	-0.996983	-10.5547	4.82926e-26	5.52223e-25	2.24463	14.6084	2.4812e-48	4.85764e-46	1.81609	7.67825	1.61279e-14	3.73809e-13
Hspa12a	-1.28672	-10.5686	4.16769e-26	4.77295e-25	1.65253	8.33074	8.03387e-17	1.67771e-15	0.899925	4.35922	1.30526e-05	0.000112181
Dlg3	-1.4075	-10.6117	2.6296e-26	3.03217e-25	1.19902	6.22992	4.66674e-10	5.08758e-09	0.674973	3.21396	0.00130916	0.00706562
Hpca	-0.962175	-10.6279	2.20953e-26	2.55558e-25	1.72504	12.8071	1.49627e-37	1.31003e-35	2.61548	13.931	4.10575e-44	8.28104e-42
Slc1a1	-1.71368	-10.6524	1.699e-26	1.97872e-25	0.999738	4.19918	2.67886e-05	0.000155524	0.723929	3.24595	0.00117061	0.00640351
Spon1	-1.3943	-10.7181	8.36607e-27	9.86504e-26	1.28106	6.73073	1.68811e-11	2.10954e-10	0.218312	1.08734	0.276887	0.460497
Bcl11a	-1.46317	-10.7212	8.09059e-27	9.54765e-26	1.3377	6.3137	2.72443e-10	3.05518e-09	1.83989	6.0814	1.19137e-09	1.82128e-08
Disp2	-1.13233	-10.8002	3.43339e-27	4.09973e-26	1.36011	8.54985	1.23249e-17	2.74459e-16	0.554157	2.38305	0.0171696	0.0595249
Rtn1	-1.10485	-10.8488	2.02082e-27	2.43029e-26	1.20481	9.73456	2.14752e-22	6.78731e-21	1.56817	10.5754	3.87387e-26	2.19198e-24
Nefm	-1.60767	-10.9011	1.13888e-27	1.37953e-26	1.92692	7.77195	7.72863e-15	1.34664e-13	1.61472	5.25715	1.46308e-07	1.71791e-06
Camk4	-1.59939	-10.9781	4.87048e-28	5.93288e-27	0.925876	4.23046	2.33211e-05	0.000136745	0.445439	1.56774	0.116943	0.252588
Dync1i1	-1.88872	-10.9788	4.83367e-28	5.89279e-27	0.630566	2.45066	0.0142593	0.0409101	0.0838115	0.297516	0.766072	0.862776
Scn2a	-1.36463	-11.005	3.61405e-28	4.42736e-27	1.34516	7.60167	2.92343e-14	4.79728e-13	0.490863	2.48327	0.0130182	0.0480214
Syp	-1.29608	-11.0755	1.64987e-28	2.03934e-27	1.08135	8.43992	3.17561e-17	6.84455e-16	0.531272	4.50767	6.55439e-06	5.96526e-05
Matn2	-1.65968	-11.1493	7.2198e-29	9.04989e-28	1.61516	6.62573	3.45538e-11	4.21341e-10	2.03895	4.25356	2.10397e-05	0.000174355
Nos1ap	-1.70935	-11.1823	4.98009e-29	6.28414e-28	1.23492	5.0389	4.68221e-07	3.54841e-06	1.22556	2.99773	0.00271997	0.0131122
Got1	-1.49692	-11.2054	3.83503e-29	4.8636e-28	1.15754	6.22159	4.92155e-10	5.34469e-09	0.407026	1.83659	0.0662704	0.167666
Uchl1	-1.45483	-11.2097	3.65418e-29	4.63814e-28	0.553796	3.60702	0.000309735	0.00143447	0.600636	3.60222	0.000315515	0.00204431
Nell2	-1.36881	-11.3547	7.02663e-30	9.16493e-29	2.38551	14.8466	7.31546e-50	1.6368e-47	1.59869	11.5329	9.00687e-31	7.3137e-29
AI593442	-1.81378	-11.4175	3.41929e-30	4.51435e-29	0.537899	2.51329	0.0119612	0.03529	0.444903	1.66851	0.0952141	0.218228
Gpr161	-1.61141	-11.4274	3.05023e-30	4.03415e-29	0.938482	4.38387	1.16588e-05	7.21113e-05	1.05744	3.66704	0.000245379	0.00163043
Lrp11	-1.62045	-11.4294	2.98038e-30	3.94522e-29	0.690756	3.40721	0.000656316	0.00280942	0.690245	2.554	0.0106494	0.0407877
Sorcs3	-1.86186	-11.6732	1.74776e-31	2.3932e-30	1.1966	4.75619	1.97283e-06	1.37329e-05	0.543334	1.81464	0.0695796	0.173775
Fam131a	-1.45245	-11.7334	8.59383e-32	1.19296e-30	2.13435	13.6302	2.6503e-42	3.55797e-40	1.63119	7.62717	2.3997e-14	5.45604e-13
Reps2	-1.53297	-11.7771	5.1199e-32	7.15318e-31	0.82326	4.51306	6.38997e-06	4.12045e-05	1.12625	3.474	0.000512754	0.0031257
Synj1	-1.35536	-11.8056	3.65273e-32	5.13659e-31	0.843393	5.05781	4.241e-07	3.22618e-06	0.0441246	0.221741	0.824515	0.898289
Pcsk2	-1.71971	-11.8142	3.29584e-32	4.63904e-31	1.81115	9.07441	1.14294e-19	2.87693e-18	0.709503	2.23213	0.0256063	0.0811471
Brinp1	-1.65797	-11.9159	9.78454e-33	1.40202e-31	1.32435	7.20505	5.80247e-13	8.47581e-12	0.953839	3.73609	0.000186907	0.0012779
Nsg1	-1.55483	-12.0123	3.06297e-33	4.47804e-32	0.554335	3.3039	0.000953484	0.00392532	0.281693	1.49681	0.134443	0.277932
Gabrg2	-2.36144	-12.0584	1.7515e-33	2.57814e-32	0.656583	2.41583	0.0156992	0.0442237	0.0352134	0.122471	0.902526	0.944443
Ywhab	-1.27205	-12.1461	6.01799e-34	8.96295e-33	0.370865	2.65421	0.00794934	0.0250009	0.485867	3.36236	0.000772786	0.00447186
Spink8	-2.65219	-12.1703	4.47333e-34	6.73539e-33	1.31856	3.4143	0.00063946	0.00274728	2.22751	3.06175	0.00220048	0.0108978
Thsd4	-2.38224	-12.2659	1.38031e-34	2.10769e-33	1.66657	4.48621	7.25028e-06	4.63281e-05	0.487919	0.982415	0.325895	0.513394
Crym	-1.66352	-12.4305	1.78534e-35	2.82904e-34	1.40213	7.73141	1.0636e-14	1.83507e-13	1.67952	7.18407	6.76655e-13	1.38714e-11
Cx3cl1	-1.31992	-12.4648	1.16159e-35	1.84839e-34	2.12006	14.3503	1.06133e-46	1.84697e-44	1.47737	6.98851	2.77813e-12	5.45376e-11
Kcnd2	-1.62393	-12.497	7.74908e-36	1.24753e-34	1.97837	8.89591	5.79438e-19	1.38308e-17	1.44158	4.99136	5.99544e-07	6.38612e-06
Rasd1	-2.89436	-12.5715	3.03035e-36	4.94172e-35	2.09354	5.12003	3.05493e-07	2.36996e-06	1.43745	2.46829	0.0135762	0.049684
[truncated: 59 more rows]

## Sheet: Table S2 dendrite-enriched
	log2FoldChange.Neuropil_vs_CB	stat.Neuropil_vs_CB	pvalues.Neuropil_vs_CB	padj.Neuropil_vs_CB	log2FoldChange.TRAP_vs_RNAseq	stat.TRAP_vs_RNAseq	pvalue.TRAP_vs_RNAseq	padj.TRAP_vs_RNAseq	log2FoldChange.CreNeg_vs_CrePos	stat.CreNeg_vs_CrePos	pvalue.CreNeg_vs_CrePos	padj.CreNeg_vs_CrePos
Ddn	3.88503	38.3695	0	0	1.4854	10.2511	1.16974e-24	4.23875e-23	1.80847	14.0531	7.36882e-45	1.61662e-42
Neurl1a	4.14761	38.5485	0	0	2.02896	12.189	3.55799e-34	2.43463e-32	1.82066	14.3245	1.53919e-46	3.49955e-44
Palm	4.27705	39.9868	0	0	2.02372	12.4656	1.14972e-35	8.85599e-34	2.20988	14.8517	6.77899e-50	2.11928e-47
Nsmf	4.39024	39.3573	0	0	1.93692	11.7159	1.05679e-31	6.08022e-30	2.09863	14.3301	1.41851e-46	3.2849e-44
Shank3	3.90786	37.7873	0	0	2.063	14.4009	5.10687e-47	9.22903e-45	1.84512	14.1768	1.27461e-45	2.84625e-43
Tmcc2	4.06501	40.043	0	0	1.4849	9.22259	2.9002e-20	7.72802e-19	1.55335	12.8379	1.00549e-37	1.39707e-35
Ttbk1	3.92908	38.3725	0	0	2.3186	13.9512	3.09246e-44	4.73819e-42	1.78089	10.3903	2.74515e-25	1.48606e-23
Ppp1r9b	3.95737	43.2228	0	0	0.973127	6.73413	1.64918e-11	2.06822e-10	1.75466	13.933	3.99233e-44	8.18427e-42
Dlgap3	4.22352	46.6858	0	0	2.00439	12.0301	2.46811e-33	1.57423e-31	1.99765	15.5096	2.98886e-54	1.09929e-51
Shank1	4.26164	37.9921	0	0	2.10605	13.1328	2.13628e-39	2.15093e-37	1.81575	11.1315	8.81584e-29	5.92699e-27
Map3k10	3.78257	39.3894	0	0	1.40572	8.64764	5.25739e-18	1.19337e-16	1.53721	10.7102	9.11667e-27	5.45474e-25
Rasl10b	4.48331	43.722	0	0	1.14334	7.38502	1.52433e-13	2.34062e-12	1.3186	10.6956	1.06712e-26	6.32436e-25
Psd	3.72746	37.3779	8.93197e-306	7.10655e-303	1.87022	12.4325	1.7401e-35	1.33307e-33	2.06046	15.3134	6.21797e-53	2.1015e-50
Agap2	3.38313	37.2074	5.17924e-303	3.91473e-300	2.3132	15.7754	4.59428e-56	1.57954e-53	2.10129	12.9207	3.43858e-38	4.8863e-36
Arhgap33	3.86762	37.1232	1.18718e-301	8.54603e-299	2.16307	13.394	6.55435e-41	7.21798e-39	2.25024	13.5632	6.61694e-42	1.18207e-39
Prrc2a	3.85287	36.9679	3.76136e-299	2.58457e-296	2.43954	15.5163	2.69211e-54	8.43288e-52	2.29729	15.754	6.44597e-56	2.68689e-53
Brsk1	3.89152	36.7671	6.19801e-296	4.07371e-293	1.52237	9.28363	1.63795e-20	4.49195e-19	1.61422	13.0129	1.03281e-38	1.51945e-36
Mllt6	4.05359	36.6774	1.67503e-294	1.05506e-291	1.48233	10.067	7.73221e-24	2.70455e-22	1.00859	9.45667	3.17902e-21	1.26604e-19
Zfpm1	3.91083	36.5513	1.70311e-292	1.02984e-289	2.17376	13.0691	4.94226e-39	4.91259e-37	2.44717	18.6495	1.27531e-77	7.9739e-74
Camk2a	4.3447	36.4365	1.12355e-290	6.53255e-288	3.00518	19.0577	5.67656e-81	1.00021e-77	2.21625	12.2656	1.3865e-34	1.4819e-32
Snph	4.06001	35.6585	1.73771e-278	9.72926e-276	2.1894	12.9263	3.19963e-38	2.98688e-36	2.09666	15.0174	5.64485e-51	1.8576e-48
Crtc1	3.93365	35.6201	6.84449e-278	3.69529e-275	2.69655	17.3894	9.93035e-68	6.99891e-65	2.57289	15.9732	1.96305e-57	1.02216e-54
Dact3	3.90855	35.2241	8.56132e-272	4.46281e-269	1.72803	9.92157	3.35425e-23	1.13114e-21	1.64574	12.035	2.32505e-33	2.28935e-31
Git1	3.56933	34.9793	4.64185e-268	2.33903e-265	1.86798	11.5496	7.41249e-31	4.03422e-29	2.03272	16.6912	1.51944e-62	1.46159e-59
Ncs1	3.92338	34.232	8.07788e-257	3.81604e-254	1.89568	12.1098	9.37307e-34	6.26175e-32	1.9188	16.2515	2.17936e-59	1.36265e-56
Zc3h7b	3.87597	34.1574	1.03999e-255	4.76408e-253	1.0728	6.78814	1.13585e-11	1.44372e-10	1.70261	9.69018	3.3194e-22	1.4363e-20
Mllt1	3.91923	34.1497	1.34984e-255	6.00161e-253	1.7537	10.596	3.10981e-26	1.24181e-24	1.67896	10.6696	1.41215e-26	8.29061e-25
Chd3	3.25241	33.8993	6.81333e-252	2.86103e-249	1.75611	13.0655	5.18376e-39	5.10981e-37	1.9494	13.4424	3.41095e-41	5.61235e-39
Pcbp4	3.73207	33.7325	1.92778e-249	7.87629e-247	1.04966	7.10828	1.17498e-12	1.66625e-11	1.42485	11.3838	5.03469e-30	3.72537e-28
Pitpnm1	3.54389	33.6738	1.39916e-248	5.56608e-246	2.47304	15.6489	3.38089e-55	1.08311e-52	1.87419	14.9157	2.60631e-50	8.3569e-48
Eef2	3.76127	33.6418	4.11453e-248	1.59486e-245	1.72444	10.4205	1.99838e-25	7.67553e-24	1.3746	9.50074	2.08403e-21	8.40672e-20
Gng7	4.231	33.364	4.5688e-244	1.68455e-241	1.13126	7.33217	2.2646e-13	3.43245e-12	2.2027	12.7864	1.95346e-37	2.62667e-35
Cep170b	3.25562	33.2726	9.62085e-243	3.46282e-240	2.17811	12.9094	3.98146e-38	3.66814e-36	1.61106	8.56498	1.08093e-17	3.18797e-16
Tnk2	3.23182	32.8497	1.15165e-236	3.86879e-234	1.90936	12.6564	1.03167e-36	8.45488e-35	1.69731	16.2144	3.98742e-59	2.37441e-56
Zmiz2	3.33049	32.4705	2.78599e-231	8.77414e-229	1.73015	10.092	5.9955e-24	2.10755e-22	1.93222	13.6622	1.70715e-42	3.09389e-40
Panx2	3.36968	32.316	4.17469e-229	1.28793e-226	1.3571	9.1617	5.10873e-20	1.32865e-18	1.68942	9.35275	8.53964e-21	3.24584e-19
Cic	3.11819	32.1693	4.74093e-227	1.40527e-224	2.04942	13.069	4.94884e-39	4.91259e-37	1.94452	14.3796	6.95018e-47	1.77371e-44
Iqsec3	3.72657	32.0376	3.26693e-225	9.49734e-223	1.90662	11.7381	8.12742e-32	4.69525e-30	1.62662	8.94114	3.85161e-19	1.31238e-17
Hcn2	3.3316	31.9352	8.66029e-224	2.47014e-221	1.72356	10.0274	1.15552e-23	3.99219e-22	1.73855	12.4647	1.16305e-35	1.38513e-33
Tbkbp1	3.79048	31.8255	2.87283e-222	8.04234e-220	1.29373	8.07104	6.97044e-16	1.32598e-14	1.17809	9.42855	4.15789e-21	1.62483e-19
Rpsa	3.6136	31.8065	5.27023e-222	1.44855e-219	0.51232	3.22714	0.00125033	0.00499281	1.58489	11.2184	3.31183e-29	2.3008e-27
Wdtc1	3.61063	31.7331	5.43688e-221	1.46767e-218	1.857	11.3812	5.18839e-30	2.63078e-28	1.57764	9.56693	1.10122e-21	4.60562e-20
Nfic	3.56086	31.694	1.88128e-220	4.98934e-218	1.2831	8.50064	1.88543e-17	4.15267e-16	1.06861	8.10179	5.4158e-16	1.40799e-14
Cabp7	3.98795	31.6172	2.14064e-219	5.57933e-217	1.73063	9.84262	7.3763e-23	2.41244e-21	1.84477	12.1329	7.06808e-34	7.30465e-32
Kifc2	3.52485	31.5661	1.0773e-218	2.76026e-216	1.19907	8.5943	8.37757e-18	1.88042e-16	1.88641	14.7614	2.59945e-49	7.73955e-47
Zfp523	3.89076	30.8699	3.02508e-209	7.49675e-207	1.51977	9.72217	2.4256e-22	7.63196e-21	1.63165	11.4503	2.34432e-30	1.80961e-28
Sgsm2	3.66011	30.8485	5.86422e-209	1.42983e-206	1.77705	10.4339	1.73666e-25	6.74379e-24	1.71083	12.6058	1.96105e-36	2.45229e-34
Neurl1b	3.71163	30.7902	3.54132e-208	8.49747e-206	2.32459	12.9473	2.43353e-38	2.30221e-36	1.54339	8.13543	4.10467e-16	1.08748e-14
Scaf1	3.0858	30.7784	5.10016e-208	1.20467e-205	2.25682	14.6129	2.32427e-48	4.61449e-46	1.47966	8.89542	5.81962e-19	1.93036e-17
Cbx6	3.27733	30.7724	6.13376e-208	1.42652e-205	2.43386	15.0898	1.89045e-51	4.67504e-49	2.13717	16.306	8.94221e-60	6.21235e-57
Abhd17a	3.55494	30.7542	1.07535e-207	2.46305e-205	1.32626	7.06742	1.57842e-12	2.20509e-11	1.87228	11.5168	1.08516e-30	8.69868e-29
Csnk1g2	3.58865	30.6926	7.15537e-207	1.5907e-204	1.18963	7.0419	1.89641e-12	2.62592e-11	1.66838	11.4494	2.36818e-30	1.81681e-28
Dgkz	3.11362	30.5598	4.19469e-205	9.05873e-203	2.60545	16.2666	1.70268e-59	8.00032e-57	2.33144	16.3802	2.64971e-60	2.07091e-57
Ppp1r16b	3.90792	30.5365	8.535e-205	1.81723e-202	1.49051	9.23196	2.65735e-20	7.10778e-19	1.36848	8.39658	4.59685e-17	1.30348e-15
D430019H16Rik	3.62736	30.3178	6.67103e-202	1.40064e-199	1.88604	12.2256	2.26874e-34	1.58318e-32	2.05407	16.4949	3.98986e-61	3.32621e-58
Mapk8ip1	3.35378	30.0833	8.00134e-199	1.61275e-196	1.68913	10.4424	1.58691e-25	6.18907e-24	1.99052	15.8767	9.18841e-57	4.41927e-54
Jph4	3.31166	29.8851	3.07057e-196	6.02828e-194	1.98781	12.919	3.51584e-38	3.26048e-36	2.08706	13.4175	4.77739e-41	7.75861e-39
Jph3	2.93764	29.8279	1.69731e-195	3.24787e-193	1.71063	10.7807	4.2459e-27	1.79192e-25	2.01698	13.5145	1.28385e-41	2.19925e-39
Rnf10	3.03278	29.8161	2.41723e-195	4.56765e-193	1.05429	7.15248	8.52252e-13	1.23088e-11	1.82775	12.7678	2.48128e-37	3.23653e-35
Pitpnm2	3.03252	29.7622	1.20583e-194	2.25044e-192	1.99844	13.4239	4.38067e-41	4.8622e-39	1.40951	11.9731	4.91691e-33	4.623e-31
Mgll	3.61922	29.7355	2.67356e-194	4.9288e-192	0.552583	3.77242	0.000161673	0.00079991	0.461584	3.19093	0.00141818	0.00755293
Abhd8	3.33593	29.7058	6.46156e-194	1.17686e-191	1.86506	10.8191	2.79588e-27	1.1979e-25	1.91971	17.1994	2.68345e-66	4.79379e-63
Tmem151b	3.1339	29.6119	1.04876e-192	1.88738e-190	1.61978	9.35215	8.58872e-21	2.39262e-19	1.68374	10.2247	1.53704e-24	7.56721e-23
Kcnab2	3.25565	29.5403	8.74131e-192	1.55462e-189	2.82042	17.5668	4.425e-69	3.6691e-66	2.34613	15.983	1.67879e-57	9.12749e-55
Maz	3.15908	29.3838	8.85776e-190	1.55701e-187	1.37672	9.73464	2.14569e-22	6.78731e-21	1.64255	10.8327	2.40968e-27	1.48438e-25
Fbxl16	3.43752	29.3489	2.46461e-189	4.28247e-187	1.85434	12.1019	1.03222e-33	6.86332e-32	2.2301	16.253	2.12642e-59	1.36265e-56
Sbk1	3.37395	29.2868	1.52763e-188	2.62423e-186	1.65832	10.2545	1.1295e-24	4.10346e-23	1.44446	9.25081	2.22808e-20	8.367e-19
Begain	3.39796	28.8858	1.79929e-183	3.05616e-181	1.94659	11.56	6.56768e-31	3.61633e-29	1.97396	16.6981	1.35371e-62	1.41068e-59
Ajm1	3.05489	28.8554	4.33965e-183	7.28917e-181	2.29935	13.6685	1.56627e-42	2.20781e-40	2.21892	11.6691	1.83283e-31	1.61055e-29
Shank2	3.23411	28.8379	7.19641e-183	1.19547e-180	2.39604	13.4506	3.05361e-41	3.47127e-39	1.72221	7.54708	4.45121e-14	9.90435e-13
Ehmt2	2.88368	28.7405	1.19163e-181	1.95803e-179	2.04441	12.3497	4.88943e-35	3.64663e-33	1.87559	13.8015	2.49447e-43	4.79897e-41
Tbc1d16	3.80422	28.6161	4.23572e-180	6.88509e-178	1.42887	8.32187	8.65872e-17	1.80552e-15	1.35387	8.2607	1.44823e-16	3.97152e-15
Sipa1l1	3.15461	28.6021	6.33545e-180	1.01886e-177	1.44279	9.2699	1.86313e-20	5.07001e-19	1.76752	9.94862	2.55701e-23	1.15019e-21
Pak6	3.48788	28.464	3.26953e-178	5.14849e-176	1.87645	12.2239	2.31697e-34	1.60887e-32	1.88729	10.7016	1.00084e-26	5.95975e-25
Dab2ip	3.13792	28.3429	1.02269e-176	1.59382e-174	2.24687	13.6663	1.61295e-42	2.24423e-40	2.24776	15.7786	4.36555e-56	1.88246e-53
Epn1	3.00662	28.3285	1.53919e-176	2.37428e-174	1.59076	10.091	6.05545e-24	2.12332e-22	2.15451	21.0623	1.76234e-98	2.20381e-94
Adcy5	3.33466	28.1708	1.33186e-174	2.01337e-172	1.48401	8.67635	4.08674e-18	9.33657e-17	1.45048	9.2438	2.37899e-20	8.90696e-19
Ube3b	3.49163	28.104	8.74487e-174	1.30887e-171	1.78127	10.9054	1.08583e-27	4.84365e-26	1.72825	11.9482	6.63486e-33	6.19171e-31
Tesk1	3.13392	27.8855	4.00527e-171	5.76644e-169	1.57045	9.66379	4.29681e-22	1.33704e-20	1.86274	11.5892	4.67559e-31	3.92405e-29
Grik5	2.63247	27.816	2.7814e-170	3.85748e-168	1.81809	10.8164	2.87833e-27	1.22948e-25	1.74105	12.8347	1.04814e-37	1.44033e-35
Dlg4	3.11961	27.7376	2.45579e-169	3.31466e-167	2.01726	13.5558	7.32124e-42	9.46791e-40	2.04549	17.0107	6.84226e-65	8.55624e-62
Scrt1	3.28552	27.5595	3.40791e-167	4.55907e-165	1.12078	7.84634	4.28352e-15	7.6046e-14	1.28141	8.06202	7.50413e-16	1.92293e-14
Eml2	2.88999	27.4422	8.61439e-166	1.13238e-163	2.07366	12.6885	6.85002e-37	5.71349e-35	1.68614	11.4778	1.70545e-30	1.33291e-28
Rapgef1	3.27261	27.4377	9.73753e-166	1.26899e-163	1.28321	8.17468	2.96646e-16	5.80767e-15	1.37331	8.41597	3.89643e-17	1.11327e-15
Cdk16	3.4025	27.086	1.44068e-161	1.8149e-159	1.11832	7.11316	1.13419e-12	1.6149e-11	1.39784	12.5433	4.32432e-36	5.30153e-34
Cacnb3	3.17515	27.0705	2.19328e-161	2.74016e-159	1.75743	11.0132	3.30102e-28	1.51075e-26	2.28472	14.3759	7.32664e-47	1.83239e-44
Hdac5	3.62202	27.0237	7.79135e-161	9.65425e-159	2.05573	11.6834	1.54889e-31	8.83931e-30	1.61835	10.4458	1.53218e-25	8.40345e-24
Cplx2	2.75953	26.9545	5.05232e-160	6.20943e-158	1.58505	11.9449	6.90705e-33	4.28906e-31	1.524	17.53	8.45284e-69	1.76171e-65
Eif3f	3.41107	26.8345	1.27938e-158	1.54723e-156	1.16888	7.28372	3.24731e-13	4.8541e-12	1.9646	13.1723	1.2667e-39	1.95557e-37
Iqsec2	3.04396	26.8106	2.42998e-158	2.91539e-156	2.52786	16.53	2.23311e-61	1.21069e-58	1.84661	12.4827	9.28308e-36	1.12704e-33
Sbf1	2.86673	26.7569	1.02636e-157	1.22169e-155	2.368	13.4541	2.91363e-41	3.36278e-39	1.71286	11.3878	4.81243e-30	3.60356e-28
Grk2	2.99206	26.6885	6.39657e-157	7.55445e-155	1.60433	9.66307	4.32692e-22	1.34344e-20	1.59273	12.8264	1.16632e-37	1.5853e-35
Lrrc10b	3.53466	26.6081	5.46675e-156	6.35699e-154	1.52281	8.53562	1.39409e-17	3.09954e-16	1.78793	10.307	6.5509e-25	3.35703e-23
Camta2	2.64843	26.5851	1.00938e-155	1.1648e-153	2.47065	14.6576	1.20455e-48	2.42562e-46	2.51588	13.482	1.99623e-41	3.37335e-39
Pcsk1n	2.84899	26.5072	8.00739e-155	9.17028e-153	0.925021	5.4182	6.02025e-08	5.15248e-07	2.50021	12.7677	2.48466e-37	3.23653e-35
Fbxo31	3.0691	26.1391	1.30974e-150	1.43474e-148	2.45287	14.927	2.19999e-50	5.08378e-48	2.03442	11.6795	1.62165e-31	1.43821e-29
Srf	2.91249	26.0384	1.82231e-149	1.96771e-147	1.98678	11.7994	3.93078e-32	2.2991e-30	2.01698	11.4269	3.0686e-30	2.31161e-28
Fam102a	3.10038	26.0053	4.3109e-149	4.62184e-147	1.60487	10.6198	2.41082e-26	9.70942e-25	1.84559	12.2579	1.52324e-34	1.60069e-32
Atn1	2.51233	25.8566	2.04862e-147	2.16567e-145	1.59689	9.55278	1.26263e-21	3.74695e-20	2.07929	13.0224	9.12886e-39	1.359e-36
Klf13	2.68485	25.7578	2.63618e-146	2.74836e-144	0.764067	3.9281	8.5619e-05	0.000452017	1.96962	12.446	1.46949e-35	1.71738e-33
Hpcal4	3.48787	25.7458	3.5936e-146	3.72085e-144	2.46484	15.3519	3.43725e-53	9.6903e-51	2.78986	16.3677	3.25085e-60	2.39129e-57
Zmat5	3.21651	25.6806	1.92502e-145	1.97963e-143	1.77361	9.87066	5.57936e-23	1.84617e-21	1.97064	12.8924	4.96739e-38	6.97946e-36
Bcl9l	3.22231	25.6136	1.07583e-144	1.09887e-142	2.05737	11.8244	2.91889e-32	1.72877e-30	1.79669	8.58907	8.76742e-18	2.60419e-16
Zfp651	2.90351	25.3552	7.88067e-142	7.94214e-140	1.11339	7.57595	3.56517e-14	5.80307e-13	1.57455	9.56243	1.1502e-21	4.79442e-20
Kcnh3	2.61704	25.3452	1.01539e-141	1.01653e-139	2.63893	15.4917	3.94817e-54	1.20986e-51	2.26121	12.6162	1.72014e-36	2.17277e-34
Mast2	3.12	25.3057	2.7659e-141	2.73281e-139	1.62774	9.62373	6.34872e-22	1.95396e-20	1.42925	7.8169	5.41415e-15	1.30451e-13
Srcin1	2.7123	25.2969	3.4531e-141	3.38964e-139	2.27558	15.2314	2.1893e-52	5.82271e-50	1.27513	8.82377	1.10671e-18	3.60401e-17
Cnih2	2.84693	25.1611	1.06784e-139	1.04146e-137	1.23142	7.54521	4.51564e-14	7.25797e-13	2.46465	18.2444	2.29041e-74	9.54721e-71
Epop	2.90071	24.9868	8.50724e-138	8.13949e-136	2.01387	12.3265	6.52498e-35	4.79042e-33	2.29812	13.0552	5.9351e-39	8.94197e-37
Caskin1	2.55933	24.8903	9.47356e-137	9.00703e-135	1.6173	9.60121	7.90152e-22	2.40043e-20	1.5065	9.98968	1.69127e-23	7.69065e-22
Mvb12b	2.96529	24.88	1.22522e-136	1.1576e-134	0.923854	5.87792	4.15463e-09	4.06975e-08	1.28977	8.74578	2.21489e-18	7.02973e-17
Pou6f1	3.13703	24.7389	4.08236e-135	3.83311e-133	1.23627	7.54163	4.64121e-14	7.45131e-13	1.49239	11.2154	3.42716e-29	2.36777e-27
Samd4b	3.11379	24.7321	4.82701e-135	4.50432e-133	1.34668	7.95415	1.80363e-15	3.29118e-14	1.52657	10.8126	2.99926e-27	1.82955e-25
Adcy1	2.85929	24.703	9.92568e-135	9.2053e-133	1.44868	9.05037	1.42487e-19	3.56748e-18	1.52478	6.38944	1.66497e-10	2.765e-09
Med25	3.04271	24.7	1.06818e-134	9.84611e-133	1.17758	7.11262	1.13859e-12	1.61953e-11	1.139	5.98987	2.10007e-09	3.11522e-08
B4galt2	3.28174	24.5681	2.77157e-133	2.50885e-131	1.14979	6.95736	3.46699e-12	4.66769e-11	1.59596	9.15213	5.58207e-20	2.01164e-18
Rundc3a	2.67008	24.5056	1.2877e-132	1.1587e-130	1.11469	7.07236	1.52322e-12	2.13858e-11	1.51213	12.4105	2.29144e-35	2.55844e-33
Gna11	2.63065	24.4496	5.08793e-132	4.52437e-130	1.80191	11.6221	3.18071e-31	1.77918e-29	1.82381	13.9977	1.61058e-44	3.41361e-42
Arhgef17	2.55391	24.4051	1.5089e-131	1.33392e-129	2.1018	13.3084	2.06817e-40	2.19195e-38	1.52044	12.0932	1.14779e-33	1.15751e-31
Epb41l1	2.8069	24.3389	7.60819e-131	6.64815e-129	1.23474	7.47606	7.65811e-14	1.20076e-12	1.73663	9.55723	1.20951e-21	5.02488e-20
Pip5k1c	2.63385	24.3057	1.70622e-130	1.48235e-128	1.58554	10.2318	1.42858e-24	5.15021e-23	1.71793	11.2283	2.96111e-29	2.08026e-27
Plch2	2.63359	24.2675	4.32407e-130	3.73525e-128	1.96673	12.0635	1.64539e-33	1.07377e-31	1.2636	6.86056	6.85933e-12	1.29376e-10
Arhgef4	2.84178	24.2651	4.58605e-130	3.93905e-128	1.17824	7.23907	4.51768e-13	6.66819e-12	1.86959	11.5685	5.95409e-31	4.93086e-29
Clmn	2.99311	24.2505	6.52686e-130	5.56478e-128	0.91262	6.71671	1.85868e-11	2.31244e-10	1.02914	6.89294	5.46528e-12	1.04023e-10
Pld3	2.66981	24.2472	7.08389e-130	5.98252e-128	3.04922	19.0723	4.29291e-81	8.64469e-78	2.38638	12.4154	2.15488e-35	2.42764e-33
Apba1	2.8931	24.1107	1.93073e-128	1.62149e-126	1.45386	8.72281	2.71371e-18	6.26063e-17	1.29211	6.39886	1.56546e-10	2.61712e-09
Traf3	3.43425	23.9963	3.03843e-127	2.50994e-125	0.573345	3.43489	0.000592804	0.00257192	0.832837	4.23285	2.3075e-05	0.000189963
Shc3	3.91685	23.984	4.08525e-127	3.35634e-125	1.57535	8.2422	1.69075e-16	3.41444e-15	1.23414	4.12762	3.6653e-05	0.000292686
Gnl1	2.55834	23.9204	1.87687e-126	1.53366e-124	1.10509	7.15645	8.27913e-13	1.19818e-11	1.6891	12.1241	7.87521e-34	8.07209e-32
Phactr1	2.64383	23.6791	5.9264e-124	4.81663e-122	2.29073	15.3953	1.76018e-53	5.06357e-51	2.16043	11.7944	4.17153e-32	3.75287e-30
Frmpd3	3.12733	23.6553	1.04054e-123	8.41166e-122	1.81643	10.7063	9.51347e-27	3.90968e-25	1.31815	6.5187	7.09203e-11	1.22157e-09
Dzip1	3.28616	23.6358	1.65163e-123	1.32807e-121	1.17656	7.10254	1.22487e-12	1.73526e-11	1.30084	9.16745	4.84331e-20	1.76063e-18
Ppfia4	2.94081	23.5825	5.82149e-123	4.63176e-121	1.53188	8.92279	4.5468e-19	1.09558e-17	1.81134	9.45237	3.31253e-21	1.31086e-19
Ssbp4	2.56657	23.4991	4.16667e-122	3.28061e-120	1.49426	8.86937	7.35589e-19	1.73974e-17	2.00165	11.5991	4.16345e-31	3.51784e-29
Homer2	3.42553	23.4679	8.68023e-122	6.79891e-120	1.30912	7.68152	1.57208e-14	2.66026e-13	1.41217	6.66842	2.5857e-11	4.59291e-10
Pex6	2.87844	23.4498	1.32929e-121	1.03582e-119	2.68088	15.6738	2.28423e-55	7.48802e-53	1.89989	13.9424	3.50011e-44	7.29482e-42
Sowaha	2.91518	23.3803	6.7796e-121	5.2024e-119	2.36088	14.6013	2.75558e-48	5.32092e-46	2.48403	15.4116	1.36874e-53	4.89033e-51
Zfp771	3.27947	23.2507	1.39913e-119	1.06284e-117	1.77965	8.91653	4.81106e-19	1.15335e-17	2.10545	10.1503	3.30252e-24	1.57027e-22
Ccdc85c	4.47387	23.1737	8.38351e-119	6.33668e-117	1.20996	6.04486	1.49537e-09	1.53077e-08	1.32559	6.07228	1.26104e-09	1.92309e-08
Capn15	3.06738	23.1498	1.45901e-118	1.09731e-116	2.23258	12.1137	8.94133e-34	6.03048e-32	1.70351	9.31212	1.25301e-20	4.74813e-19
Adgrb2	2.06211	23.135	2.06062e-118	1.5421e-116	2.38151	15.7941	3.41876e-56	1.20477e-53	1.96578	16.7416	6.52337e-63	7.41588e-60
Arrb1	3.0463	23.0997	4.66686e-118	3.47531e-116	0.955808	6.15046	7.7257e-10	8.21278e-09	0.669066	4.59355	4.35778e-06	4.12833e-05
Stac2	3.43442	22.989	6.00763e-117	4.43012e-115	0.792496	4.79772	1.60483e-06	1.12939e-05	2.29055	7.65609	1.91677e-14	4.38194e-13
Nfix	2.14829	22.7839	6.61802e-115	4.80984e-113	1.15059	7.67661	1.63352e-14	2.75431e-13	0.809248	8.06633	7.24442e-16	1.86402e-14
Ppp2r2c	2.46249	22.7101	3.55737e-114	2.53664e-112	1.52545	10.3763	3.17864e-25	1.20771e-23	1.95161	11.618	3.33681e-31	2.83856e-29
Dusp8	2.7729	22.6886	5.8117e-114	4.12467e-112	2.09778	13.4361	3.71704e-41	4.19163e-39	2.04847	10.7443	6.30336e-27	3.8079e-25
Rack1	3.22219	22.685	6.30239e-114	4.43131e-112	1.05936	6.12428	9.10971e-10	9.58287e-09	1.24943	10.3722	3.31721e-25	1.78033e-23
Tnrc18	2.5356	22.644	1.59937e-113	1.11418e-111	2.08288	12.2573	1.53549e-34	1.08765e-32	1.10775	4.76258	1.9113e-06	1.90445e-05
Cdk5r2	2.29682	22.6014	4.19656e-113	2.91007e-111	1.93571	12.1947	3.31658e-34	2.28051e-32	2.35857	14.3389	1.25084e-46	2.95127e-44
Fbxo41	2.57833	22.591	5.31096e-113	3.66601e-111	2.26338	13.0101	1.07211e-38	1.02112e-36	1.99106	8.30217	1.02224e-16	2.84069e-15
Dvl1	3.02849	22.4788	6.68909e-112	4.59632e-110	1.8319	10.0421	9.95388e-24	3.45591e-22	1.91723	11.1292	9.0449e-29	6.04847e-27
Aatk	2.31611	22.4293	2.03911e-111	1.38853e-109	2.07454	13.039	7.34518e-39	7.09162e-37	1.32894	9.0289	1.73406e-19	6.05709e-18
Ppp1r16a	3.36393	22.3764	6.67832e-111	4.46709e-109	1.14309	6.47	9.8006e-11	1.13985e-09	1.65863	8.68624	3.74634e-18	1.1596e-16
Gfod1	2.74117	22.3651	8.60078e-111	5.72767e-109	1.99149	12.4269	1.86765e-35	1.42305e-33	1.88524	9.46339	2.98126e-21	1.19489e-19
Speg	2.4678	22.287	4.94162e-110	3.26211e-108	1.78888	11.3516	7.28565e-30	3.65475e-28	1.94909	10.1375	3.76651e-24	1.77737e-22
Znrf1	3.12813	22.1681	6.98569e-109	4.5323e-107	1.27481	7.27295	3.51723e-13	5.24089e-12	1.74735	12.0798	1.34976e-33	1.3503e-31
Prrc2b	2.42271	22.1606	8.25007e-109	5.30708e-107	1.91347	11.8829	1.45224e-32	8.78572e-31	1.88242	9.66048	4.438e-22	1.90059e-20
Ski	2.47137	22.1241	1.85151e-108	1.18599e-106	1.54925	9.87792	5.18987e-23	1.72133e-21	1.54236	9.92416	3.26834e-23	1.45447e-21
Ctdsp2	2.74944	22.1074	2.68498e-108	1.71261e-106	0.659533	4.08853	4.34107e-05	0.000242247	0.988284	6.167	6.95996e-10	1.08252e-08
Agap3	2.45426	22.0791	5.0173e-108	3.1735e-106	1.93004	11.6743	1.72555e-31	9.76839e-30	2.06373	14.5893	3.28343e-48	8.92593e-46
2700081O15Rik	2.70102	22.0758	5.39433e-108	3.39775e-106	2.58453	15.4314	1.00678e-53	2.99417e-51	2.32601	14.8212	1.06865e-49	3.25939e-47
Dennd4b	3.22923	21.9038	2.39169e-106	1.49402e-104	2.0262	10.9121	1.00882e-27	4.51441e-26	1.64995	7.91355	2.5016e-15	6.15797e-14
Zfp365	3.07162	21.8449	8.70068e-106	5.3905e-104	0.983852	6.63839	3.17135e-11	3.8805e-10	1.94562	11.3682	6.02419e-30	4.35448e-28
Src	2.32129	21.7508	6.78353e-105	4.16856e-103	1.13214	7.50048	6.35839e-14	1.00255e-12	1.27862	7.99931	1.25121e-15	3.12929e-14
Pitpnm3	3.32257	21.7028	1.93066e-104	1.17212e-102	1.7787	8.94663	3.66509e-19	8.93825e-18	1.72807	7.34757	2.0185e-13	4.26373e-12
Rap1gap2	2.91533	21.645	6.77234e-104	4.07879e-102	1.63418	9.68949	3.34194e-22	1.04452e-20	1.39532	6.27977	3.3907e-10	5.48521e-09
Syngap1	2.07667	21.6198	1.16938e-103	7.01488e-102	2.13867	13.238	5.29325e-40	5.44625e-38	2.0974	12.6535	1.0706e-36	1.36611e-34
1700003E16Rik	3.46382	21.598	1.8774e-103	1.12176e-101	1.48156	8.06683	7.21484e-16	1.36878e-14	1.75586	9.55427	1.24461e-21	5.1536e-20
St6galnac6	3.14507	21.5368	7.04109e-103	4.17412e-101	0.401277	2.45978	0.0139024	0.0400507	1.34975	8.33939	7.46737e-17	2.10314e-15
Pacs2	3.05016	21.3844	1.86567e-101	1.08893e-99	0.602951	3.94712	7.90974e-05	0.000420739	0.563874	3.20697	0.00134139	0.00720312
Wdr13	2.81434	21.1808	1.43601e-99	8.25405e-98	1.66362	11.0312	2.70381e-28	1.24552e-26	1.70824	10.2526	1.15243e-24	5.7876e-23
Thra	2.40151	21.1706	1.78236e-99	1.0206e-97	1.67435	11.1894	4.59765e-29	2.21189e-27	2.1791	17.7734	1.13575e-70	2.84051e-67
Akt1	2.58524	21.1428	3.21236e-99	1.8325e-97	1.05306	6.72667	1.73589e-11	2.16541e-10	1.2826	10.1497	3.32355e-24	1.57428e-22
Nisch	2.23305	21.0033	6.11512e-98	3.42379e-96	2.20419	13.5335	9.91339e-42	1.22578e-39	1.43989	8.01633	1.08953e-15	2.73585e-14
Bcr	2.26297	20.9928	7.62416e-98	4.25293e-96	2.06137	14.1184	2.92461e-45	4.85004e-43	1.85372	14.5955	3.00032e-48	8.33755e-46
Celf4	2.56319	20.8808	7.99941e-97	4.39735e-95	1.61555	11.0724	1.70792e-28	8.02492e-27	1.90567	15.8113	2.6004e-56	1.16136e-53
Stox2	2.9347	20.8503	1.51552e-96	8.24105e-95	1.74461	11.0573	2.02152e-28	9.40438e-27	1.39853	5.06463	4.09199e-07	4.47684e-06
Castor2	2.94214	20.8382	1.95147e-96	1.05358e-94	1.4351	8.23597	1.78104e-16	3.58652e-15	1.1486	6.97053	3.15756e-12	6.14079e-11
Ppp1r37	2.3826	20.8179	2.9808e-96	1.60359e-94	1.70786	9.97205	2.02022e-23	6.86195e-22	1.59655	12.5507	3.93893e-36	4.87686e-34
Agap1	2.64911	20.7779	6.85322e-96	3.66078e-94	1.68913	11.5246	9.91182e-31	5.33271e-29	1.29438	6.42475	1.32082e-10	2.22599e-09
Arhgef10l	3.4004	20.7607	9.82077e-96	5.19093e-94	1.18278	6.92161	4.46541e-12	5.93256e-11	0.528586	2.53028	0.0113973	0.0431105
Elfn2	2.32655	20.7453	1.35138e-95	7.09333e-94	2.16937	13.6858	1.23378e-42	1.79293e-40	1.62429	10.1886	2.22978e-24	1.08496e-22
Rtn2	3.08247	20.7328	1.7515e-95	9.16175e-94	0.973461	5.48992	4.02126e-08	3.51854e-07	1.26027	8.48406	2.17478e-17	6.29529e-16
Bsn	2.17679	20.7242	2.09381e-95	1.09145e-93	2.43518	14.2922	2.44884e-46	4.20962e-44	1.93972	7.75588	8.77303e-15	2.08965e-13
Mknk2	2.9187	20.6603	7.89362e-95	4.08657e-93	1.35319	8.64346	5.4534e-18	1.23587e-16	1.44486	7.04278	1.88439e-12	3.72852e-11
Lasp1	2.71545	20.6353	1.32324e-94	6.82711e-93	0.917926	5.44979	5.04282e-08	4.36095e-07	1.45087	10.3089	6.42233e-25	3.30499e-23
Sptbn2	1.91387	20.6058	2.43247e-94	1.25074e-92	1.61517	9.43021	4.09254e-21	1.17253e-19	1.79446	11.4395	2.65435e-30	2.02394e-28
Atp13a2	2.17672	20.582	3.97843e-94	2.03871e-92	2.05663	11.4838	1.59047e-30	8.27281e-29	1.45399	8.35013	6.81887e-17	1.92483e-15
Gas2l1	2.86888	20.5168	1.52338e-93	7.78007e-92	1.23222	7.1356	9.63632e-13	1.38183e-11	1.4193	6.96897	3.19259e-12	6.19927e-11
Arc	2.3677	20.4292	9.20223e-93	4.66208e-91	2.83766	18.2304	2.95908e-74	3.20855e-71	2.40236	11.586	4.85064e-31	4.04382e-29
Mpnd	2.78116	20.4291	9.22116e-93	4.66208e-91	1.33392	7.36045	1.83295e-13	2.80535e-12	1.70858	9.66842	4.10671e-22	1.76475e-20
Btbd2	2.35778	20.4068	1.45487e-92	7.30675e-91	1.77861	11.9933	3.85362e-33	2.42503e-31	1.60292	8.20307	2.3433e-16	6.27472e-15
Ptpa	2.5516	20.2525	3.37377e-91	1.68878e-89	1.56193	9.12146	7.41194e-20	1.88931e-18	1.68808	10.9488	6.73656e-28	4.32004e-26
Synpo	2.13112	20.2452	3.91682e-91	1.94772e-89	2.1414	13.0235	8.99645e-39	8.6268e-37	2.71301	17.8512	2.82836e-71	8.84216e-68
Trim8	2.22604	20.2384	4.49657e-91	2.22868e-89	1.06836	7.28683	3.17336e-13	4.74859e-12	1.06232	8.65856	4.77761e-18	1.46431e-16
Huwe1	2.18623	20.2344	4.87213e-91	2.40693e-89	1.61532	12.1646	4.79963e-34	3.26838e-32	1.32752	7.07847	1.45752e-12	2.90691e-11
Plekhm2	2.52937	20.1827	1.3895e-90	6.84203e-89	0.567693	3.17959	0.00147484	0.00578284	1.13865	5.66044	1.50986e-08	1.99681e-07
6430548M08Rik	2.67044	20.094	8.33428e-90	4.06417e-88	2.09923	12.4793	9.68858e-36	7.50386e-34	1.54258	11.0515	2.15565e-28	1.41876e-26
Med13l	2.49517	20.0919	8.68374e-90	4.22097e-88	1.77956	11.6042	3.92523e-31	2.18696e-29	1.48878	7.67552	1.64749e-14	3.80109e-13
AI506816	2.96381	20.055	1.82556e-89	8.84519e-88	0.941896	5.97982	2.23387e-09	2.25402e-08	0.927864	5.93674	2.90742e-09	4.23745e-08
Nova2	2.09184	20.0316	2.92154e-89	1.41102e-87	2.56418	16.6365	3.78878e-62	2.22528e-59	2.29581	10.9238	8.86963e-28	5.60175e-26
Prkcz	2.25738	20.0254	3.30619e-89	1.59171e-87	1.64625	10.4785	1.08504e-25	4.26037e-24	1.76777	12.4362	1.66267e-35	1.92516e-33
Elavl3	2.15469	20.0027	5.21358e-89	2.4941e-87	2.22043	14.7538	2.90665e-49	6.2079e-47	2.14615	17.1325	8.49682e-66	1.18059e-62
Rnf165	2.21216	19.9864	7.22846e-89	3.44709e-87	2.03501	13.5175	1.23225e-41	1.4846e-39	1.69781	8.41884	3.80221e-17	1.09052e-15
Trak1	2.53415	19.9657	1.09444e-88	5.20274e-87	1.14931	6.51376	7.3294e-11	8.64562e-10	1.32818	9.85666	6.41473e-23	2.84455e-21
Klhl34	2.99057	19.9484	1.54757e-88	7.33373e-87	2.16428	10.8401	2.22331e-27	9.58405e-26	1.79082	5.77379	7.75092e-09	1.07337e-07
Ppfia3	2.14276	19.8241	1.84384e-87	8.5501e-86	1.69437	10.3138	6.10432e-25	2.25253e-23	1.58759	12.4534	1.34092e-35	1.5819e-33
Mta3	2.78307	19.8151	2.20385e-87	1.01882e-85	2.01446	10.7604	5.29246e-27	2.22031e-25	1.09956	4.90936	9.13764e-07	9.44349e-06
Trnp1	2.80767	19.7831	4.16118e-87	1.91782e-85	1.02294	6.07553	1.23583e-09	1.2809e-08	1.84523	12.9593	2.08221e-38	2.99288e-36
Ankrd13b	2.42024	19.7429	9.22679e-87	4.23956e-85	1.75602	10.4334	1.74492e-25	6.75724e-24	1.44517	6.73396	1.65109e-11	2.99664e-10
Ubqln4	2.43482	19.7323	1.13827e-86	5.2143e-85	1.30505	7.87558	3.39174e-15	6.04424e-14	1.98754	12.4266	1.87402e-35	2.14996e-33
Nyap1	2.32129	19.6272	9.05005e-86	4.1084e-84	1.77629	10.8756	1.50737e-27	6.63998e-26	1.51175	10.6588	1.58711e-26	9.209e-25
Nacc1	2.31545	19.6244	9.56686e-86	4.33e-84	1.60927	9.82348	8.92072e-23	2.9108e-21	1.17998	6.75687	1.41005e-11	2.58166e-10
Marf1	2.73912	19.6099	1.27384e-85	5.74827e-84	0.657496	3.87579	0.000106279	0.000548959	0.33201	2.06275	0.0391366	0.113788
Atxn7l3	2.50301	19.5923	1.79773e-85	8.0882e-84	0.626846	4.01175	6.02694e-05	0.000327383	1.56449	10.847	2.05969e-27	1.27507e-25
Wiz	2.88549	19.5501	4.11333e-85	1.83968e-83	1.22808	7.50679	6.05963e-14	9.60816e-13	1.47862	6.65037	2.92355e-11	5.17833e-10
2020-09-05	1.87276	19.4657	2.14619e-84	9.54236e-83	1.5699	11.4767	1.72773e-30	8.95372e-29	1.73795	12.3581	4.40373e-35	4.78858e-33
Zfp423	3.48516	19.3428	2.34343e-83	1.02091e-81	1.17509	5.94151	2.82413e-09	2.81734e-08	1.12263	5.08334	3.70864e-07	4.08964e-06
St3gal2	2.50759	19.2705	9.49916e-83	4.09114e-81	0.574713	3.299	0.000970299	0.00397938	1.2526	8.25358	1.53724e-16	4.19721e-15
Fgf13	2.56517	19.2678	1.00015e-82	4.29526e-81	1.44444	9.20266	3.49186e-20	9.20023e-19	2.39267	11.4835	1.59599e-30	1.26316e-28
Acap3	2.09055	19.1141	1.92603e-81	8.17857e-80	2.13354	12.2547	1.5848e-34	1.11697e-32	2.15547	11.3768	5.45511e-30	3.97301e-28
Zbtb4	2.51263	19.0961	2.71962e-81	1.1484e-79	1.22552	7.18803	6.5731e-13	9.56185e-12	1.27054	7.29494	2.98798e-13	6.21708e-12
Ap1b1	2.3726	19.0223	1.11534e-80	4.68349e-79	1.73195	9.93703	2.87268e-23	9.71062e-22	1.53575	8.75709	2.00353e-18	6.40771e-17
Pik3r2	2.18381	18.9886	2.11933e-80	8.85024e-79	2.02658	11.7759	5.19441e-32	3.02564e-30	2.40735	12.3827	3.24083e-35	3.58643e-33
2610507B11Rik	2.1424	18.9629	3.45542e-80	1.439e-78	1.39846	9.15229	5.5738e-20	1.43898e-18	0.963178	7.16799	7.61082e-13	1.54502e-11
Bag6	1.9373	18.8526	2.79915e-79	1.14674e-77	2.03347	12.0814	1.32498e-33	8.68691e-32	1.71036	9.08822	1.00674e-19	3.55628e-18
Rnf157	2.29211	18.8483	3.03712e-79	1.24087e-77	1.73364	11.2604	2.05867e-29	1.00412e-27	1.79298	10.2568	1.10333e-24	5.56337e-23
Cul9	2.33668	18.8327	4.07514e-79	1.66048e-77	2.25294	11.523	1.0107e-30	5.41706e-29	1.08053	5.22397	1.7513e-07	2.02965e-06
Dennd5a	2.47822	18.8121	6.01153e-79	2.44291e-77	0.887068	5.60928	2.03166e-08	1.83344e-07	1.00828	6.23479	4.52385e-10	7.22486e-09
Aco2	2.04827	18.7832	1.03651e-78	4.20076e-77	1.20193	7.98172	1.44314e-15	2.65568e-14	0.693166	4.37793	1.19811e-05	0.000103541
Taok2	2.04371	18.7172	3.5824e-78	1.448e-76	1.42283	8.88259	6.53226e-19	1.55276e-17	1.00017	6.7581	1.3981e-11	2.56352e-10
Dmwd	2.00597	18.6537	1.17882e-77	4.73943e-76	1.57096	10.3669	3.50656e-25	1.32516e-23	1.48104	10.1057	5.21125e-24	2.43159e-22
Pdzd4	2.63475	18.653	1.19294e-77	4.78349e-76	1.57557	9.21538	3.10184e-20	8.21872e-19	1.5912	8.25098	1.57102e-16	4.28009e-15
Rabl6	2.31903	18.5374	1.03133e-76	4.08133e-75	1.79874	11.5904	4.60999e-31	2.54833e-29	1.37762	9.17235	4.62808e-20	1.68729e-18
Ube2i	2.38992	18.52	1.42404e-76	5.6207e-75	1.65114	10.7299	7.36997e-27	3.0555e-25	1.96543	14.5502	5.82408e-48	1.51729e-45
Nr2f6	2.98875	18.5179	1.48099e-76	5.83023e-75	1.43578	6.92663	4.30988e-12	5.73674e-11	1.59488	7.93228	2.15155e-15	5.33832e-14
Rnf44	2.09682	18.3924	1.51173e-75	5.90511e-74	1.41004	9.50132	2.0725e-21	6.09895e-20	1.68749	11.6687	1.84173e-31	1.61055e-29
Rps6ka4	2.72969	18.3801	1.89461e-75	7.38166e-74	1.48432	8.21191	2.17691e-16	4.32406e-15	0.963494	4.97333	6.58135e-07	6.94513e-06
Vps9d1	2.68375	18.38	1.90034e-75	7.38497e-74	1.29198	6.955	3.52556e-12	4.74201e-11	1.93042	8.98292	2.63673e-19	9.1336e-18
Ctse	2.85251	18.3725	2.18089e-75	8.45347e-74	0.85316	5.24993	1.5216e-07	1.23582e-06	0.882967	5.78819	7.1149e-09	9.88575e-08
Phf2	2.47533	18.2658	1.54815e-74	5.90993e-73	1.08944	6.43244	1.25571e-10	1.44494e-09	1.01645	6.12769	8.9166e-10	1.37827e-08
Arhgap23	2.43591	18.2478	2.15586e-74	8.18849e-73	1.18491	7.21152	5.53308e-13	8.10751e-12	1.69861	9.11145	8.12863e-20	2.90424e-18
Adap1	2.11685	18.2007	5.09751e-74	1.92167e-72	1.16305	6.5471	5.86656e-11	6.99029e-10	1.68858	11.2817	1.61649e-29	1.14204e-27
Ntng2	3.09557	18.1957	5.58152e-74	2.0989e-72	1.86873	9.64931	4.94878e-22	1.52978e-20	1.55958	6.85508	7.12739e-12	1.34027e-10
Chd5	1.88989	18.1735	8.37251e-74	3.14062e-72	2.17158	13.2474	4.67408e-40	4.88043e-38	1.26214	9.94203	2.732e-23	1.22013e-21
Cacna1h	2.10106	18.1575	1.12112e-73	4.19503e-72	2.34735	13.4536	2.93432e-41	3.36278e-39	1.93934	9.44797	3.45473e-21	1.36282e-19
Mgat4b	2.5634	18.1294	1.8681e-73	6.97286e-72	1.2296	7.26288	3.78934e-13	5.63444e-12	1.69492	9.59963	8.02314e-22	3.38951e-20
Arnt2	2.23437	18.1022	3.06118e-73	1.13421e-71	1.57677	10.7317	7.22561e-27	3.00449e-25	1.43699	6.97162	3.13303e-12	6.10257e-11
Dlg2	2.45303	18.0898	3.83676e-73	1.4112e-71	1.86666	12.2873	1.05994e-34	7.62293e-33	2.11232	10.158	3.05215e-24	1.45676e-22
Zfp335	2.85858	18.0847	4.20456e-73	1.54273e-71	1.77212	9.48955	2.32031e-21	6.7857e-20	1.72408	6.39624	1.59245e-10	2.65514e-09
Mprip	2.02103	18.0046	1.79389e-72	6.4876e-71	0.980914	5.78009	7.46586e-09	7.08201e-08	1.29288	7.52567	5.24502e-14	1.15882e-12
Wsb2	2.34443	17.9835	2.62321e-72	9.44169e-71	0.432629	2.62964	0.00854747	0.0266383	1.52808	11.205	3.854e-29	2.64803e-27
Doc2b	2.0015	17.9558	4.32053e-72	1.55139e-70	2.30792	13.7122	8.57999e-43	1.25983e-40	2.93408	15.5628	1.3023e-54	4.93494e-52
Ankrd11	1.85961	17.8331	3.90969e-71	1.39723e-69	1.76475	12.8807	5.78218e-38	5.25843e-36	1.12755	8.37863	5.35465e-17	1.51493e-15
Tef	2.29925	17.7812	9.88304e-71	3.51534e-69	1.4986	9.89919	4.19672e-23	1.40182e-21	1.7432	9.21513	3.10891e-20	1.1502e-18
Gp1bb	4.25907	17.7193	2.97682e-70	1.05388e-68	1.17629	5.59139	2.2526e-08	2.02633e-07	0.897017	3.76355	0.000167516	0.00116183
Endov	2.9925	17.6632	8.0546e-70	2.82509e-68	1.39463	7.87204	3.48892e-15	6.20957e-14	1.43626	7.7757	7.50308e-15	1.794e-13
Dda1	2.36788	17.6438	1.13466e-69	3.96137e-68	0.993501	5.30728	1.11272e-07	9.21554e-07	1.75054	9.35977	7.99119e-21	3.05596e-19
Fbf1	2.47709	17.6186	1.77311e-69	6.17607e-68	1.17254	6.60851	3.8822e-11	4.71348e-10	1.4011	6.89858	5.2524e-12	1.00277e-10
Pdxk	2.28535	17.5309	8.32195e-69	2.88539e-67	1.49282	8.76031	1.94722e-18	4.52191e-17	0.669957	4.38007	1.18641e-05	0.000102743
Egln1	2.55332	17.4386	4.20111e-68	1.44666e-66	0.547641	3.12761	0.00176235	0.00676342	1.45168	9.12239	7.34869e-20	2.6331e-18
Ppp1r12b	3.01052	17.4259	5.25153e-68	1.80426e-66	1.72987	4.13515	3.54723e-05	0.000201377	1.89796	6.9649	3.28641e-12	6.37155e-11
Hectd4	1.80881	17.3815	1.13855e-67	3.89399e-66	2.37456	15.121	1.17705e-51	2.96279e-49	1.02836	5.65758	1.53525e-08	2.02728e-07
Dlgap4	1.79309	17.38	1.16989e-67	3.99215e-66	1.60471	10.7276	7.55546e-27	3.12322e-25	1.54812	9.73613	2.11463e-22	9.21376e-21
Psd3	2.15032	17.359	1.68756e-67	5.74567e-66	2.06353	14.6662	1.06151e-48	2.16856e-46	2.2251	9.2837	1.63698e-20	6.16579e-19
Hdac4	2.44998	17.3418	2.27596e-67	7.71427e-66	2.11335	12.8316	1.09112e-37	9.85922e-36	1.38588	6.09586	1.08848e-09	1.67012e-08
Pabpc4	2.85222	17.3344	2.58733e-67	8.75002e-66	1.44468	8.39197	4.78074e-17	1.01034e-15	1.98359	10.5988	3.01978e-26	1.72431e-24
Tnpo2	2.17234	17.3291	2.83718e-67	9.57357e-66	1.79169	11.8746	1.60376e-32	9.66096e-31	1.44043	11.6389	2.61294e-31	2.26909e-29
Rbck1	2.40282	17.329	2.84464e-67	9.57739e-66	1.2988	7.50353	6.2124e-14	9.82828e-13	1.79411	9.29152	1.52095e-20	5.74605e-19
Zfp358	2.80637	17.2897	5.62012e-67	1.87963e-65	1.34584	6.80442	1.01456e-11	1.29658e-10	1.61308	6.85741	7.0122e-12	1.3206e-10
Tmem8b	2.11581	17.2706	7.83725e-67	2.6096e-65	1.90593	12.8214	1.2446e-37	1.11037e-35	1.7467	9.17901	4.35063e-20	1.59078e-18
Gpi1	1.70319	17.269	8.04645e-67	2.67337e-65	1.58946	10.3239	5.49688e-25	2.04443e-23	1.04123	8.17758	2.89593e-16	7.70502e-15
Rell2	2.55358	17.2588	9.60543e-67	3.18433e-65	0.715917	3.91284	9.12152e-05	0.000477981	1.77381	9.45273	3.30091e-21	1.31041e-19
Zmiz1	2.0012	17.2362	1.42049e-66	4.69881e-65	1.50728	10.209	1.8068e-24	6.46413e-23	1.26947	8.65632	4.87246e-18	1.48973e-16
Tom1l2	2.11133	17.2342	1.46981e-66	4.85133e-65	1.36901	8.28435	1.1876e-16	2.43675e-15	1.67048	9.8345	7.99655e-23	3.53346e-21
Camk2n1	2.32518	17.2275	1.64994e-66	5.4222e-65	0.395408	2.52423	0.0115951	0.0343514	1.41336	12.0281	2.5282e-33	2.45079e-31
Zbtb7a	1.80168	17.1728	4.24234e-66	1.38813e-64	2.21166	14.3924	5.77657e-47	1.03072e-44	1.38918	10.926	8.65665e-28	5.49499e-26
Gga1	2.20433	17.1486	6.44282e-66	2.09906e-64	1.39331	7.55308	4.25074e-14	6.86351e-13	1.86001	10.1369	3.78816e-24	1.78086e-22
Arid1a	1.87407	17.1152	1.14227e-65	3.68966e-64	1.53102	10.4945	9.15955e-26	3.60651e-24	1.3957	9.50184	2.06215e-21	8.34535e-20
Adra2c	2.32984	17.1065	1.32841e-65	4.27268e-64	2.10484	12.0582	1.75682e-33	1.13597e-31	1.77103	9.38434	6.33121e-21	2.44357e-19
Pou3f3	1.96975	17.081	2.05734e-65	6.56135e-64	1.3496	8.45874	2.70278e-17	5.87033e-16	1.30194	8.7063	3.13946e-18	9.7659e-17
Msl1	2.3895	16.9787	1.18123e-64	3.70471e-63	0.96402	6.05451	1.40841e-09	1.44701e-08	1.34542	11.2247	3.08488e-29	2.15511e-27
Hivep2	1.92271	16.8681	7.71866e-64	2.39596e-62	2.93627	18.901	1.11841e-79	1.57651e-76	1.77374	7.54345	4.57715e-14	1.01548e-12
Dok6	3.77746	16.8607	8.751e-64	2.70529e-62	1.85028	7.60734	2.79798e-14	4.60214e-13	1.67106	3.75877	0.000170751	0.001181
Rin1	2.00851	16.7922	2.78499e-63	8.53971e-62	2.37284	13.6712	1.5092e-42	2.14886e-40	2.15446	12.7745	2.2772e-37	3.0294e-35
Fbxl19	2.22543	16.7846	3.16268e-63	9.65862e-62	1.63143	8.85503	8.36613e-19	1.97206e-17	1.56153	8.92204	4.57776e-19	1.53472e-17
Sympk	2.02826	16.7474	5.91296e-63	1.80214e-61	1.6184	9.41031	4.94676e-21	1.39459e-19	2.15272	10.281	8.58736e-25	4.34757e-23
Pink1	1.97662	16.6969	1.37997e-62	4.16386e-61	1.03423	7.11759	1.09833e-12	1.56859e-11	0.281697	2.48977	0.0127827	0.0473483
Mxd4	2.83961	16.6838	1.72021e-62	5.16985e-61	0.466905	2.77123	0.00558449	0.0185027	1.18289	5.70647	1.15341e-08	1.55592e-07
Eef1a2	1.76023	16.6713	2.11894e-62	6.33044e-61	2.0974	12.8096	1.44829e-37	1.27594e-35	2.19331	16.0048	1.18366e-57	6.72801e-55
Rexo1	2.13833	16.6502	3.01496e-62	8.97187e-61	1.84917	11.4899	1.48305e-30	7.74264e-29	1.84168	10.3141	6.08555e-25	3.14462e-23
Spen	2.1681	16.6279	4.37874e-62	1.30046e-60	1.3093	8.41475	3.93748e-17	8.37146e-16	1.28708	4.54109	5.59636e-06	5.14955e-05
Zfhx2	2.10302	16.6224	4.80033e-62	1.42287e-60	1.53377	9.1899	3.93213e-20	1.02643e-18	1.834	7.54336	4.58e-14	1.01548e-12
Fasn	1.77236	16.6095	5.951e-62	1.76049e-60	1.69597	10.4423	1.58942e-25	6.18907e-24	0.466902	1.9433	0.0519801	0.140692
Socs7	2.09464	16.5693	1.16131e-61	3.40885e-60	1.629	10.8717	1.57325e-27	6.90857e-26	1.48666	8.31258	9.36411e-17	2.6138e-15
Wwc1	2.11231	16.5624	1.30283e-61	3.80945e-60	1.02274	5.82896	5.57745e-09	5.38492e-08	1.2941	6.71533	1.87639e-11	3.3957e-10
Mmp24	2.48467	16.4934	4.09519e-61	1.19281e-59	1.60202	8.13106	4.25544e-16	8.20584e-15	1.94471	10.1126	4.85809e-24	2.2753e-22
Rasd2	2.16501	16.3641	3.45362e-60	9.96344e-59	2.02313	11.5539	7.05196e-31	3.86787e-29	2.30789	13.5548	7.42303e-42	1.30739e-39
Lztr1	2.03573	16.3637	3.4754e-60	1.00072e-58	2.4992	14.9771	1.03702e-50	2.4776e-48	1.55069	10.8198	2.77246e-27	1.69949e-25
Tacc1	2.08239	16.3632	3.4999e-60	1.00586e-58	1.43687	8.19291	2.54995e-16	5.04125e-15	1.25381	4.0092	6.09241e-05	0.000467117
Atg2a	2.29013	16.2744	1.49946e-59	4.27686e-58	2.04396	11.0789	1.58881e-28	7.49027e-27	1.16475	5.37025	7.86282e-08	9.52758e-07
Zfp704	2.34056	16.2447	2.43679e-59	6.93729e-58	1.57921	9.56505	1.12147e-21	3.35205e-20	1.31388	5.44663	5.13321e-08	6.37446e-07
Fam53c	2.3555	16.2156	3.9149e-59	1.10827e-57	1.27805	7.80051	6.16566e-15	1.08233e-13	1.21549	6.50247	7.9013e-11	1.35165e-09
Cdc42bpb	1.92233	16.2017	4.90464e-59	1.38327e-57	2.14427	13.9351	3.87391e-44	5.87169e-42	1.25689	9.36422	7.66149e-21	2.93886e-19
Sobp	1.8363	16.1429	1.27432e-58	3.57401e-57	2.00448	12.8202	1.26451e-37	1.12104e-35	1.96149	10.4471	1.51033e-25	8.32014e-24
Zcchc14	1.93324	16.0939	2.81383e-58	7.83365e-57	2.01432	13.5521	7.69531e-42	9.77235e-40	1.72199	8.67163	4.25981e-18	1.31528e-16
Nop53	2.1692	16.0819	3.41681e-58	9.49485e-57	0.740384	4.30376	1.67921e-05	0.000101111	1.81737	8.71212	2.98235e-18	9.32357e-17
Bap1	2.07068	16.0501	5.70484e-58	1.57086e-56	1.64139	9.84474	7.22243e-23	2.37313e-21	1.33543	7.90267	2.72982e-15	6.70657e-14
Rims4	3.42994	15.9948	1.38962e-57	3.81944e-56	1.98398	7.88625	3.11415e-15	5.57777e-14	1.99076	5.65019	1.60266e-08	2.10076e-07
Hipk4	1.93723	15.9851	1.6229e-57	4.45251e-56	2.90257	16.8417	1.20716e-63	7.73459e-61	2.21921	10.1961	2.06461e-24	1.01247e-22
Itpr1	2.0752	15.9777	1.82753e-57	5.00486e-56	2.28735	14.8546	6.4907e-50	1.47569e-47	1.78639	6.98806	2.78715e-12	5.4629e-11
Map1s	2.03773	15.956	2.58897e-57	7.07729e-56	2.13755	11.976	4.74931e-33	2.96977e-31	1.54795	9.81394	9.80618e-23	4.30268e-21
Med16	2.22643	15.9482	2.93193e-57	8.00035e-56	1.57507	8.12565	4.44963e-16	8.54523e-15	1.15581	5.72624	1.02678e-08	1.4002e-07
Trim46	2.05525	15.9443	3.11955e-57	8.49699e-56	1.64036	9.56363	1.137e-21	3.38839e-20	1.69364	9.44216	3.65156e-21	1.43594e-19
Ppp6r1	1.94126	15.9198	4.6152e-57	1.25257e-55	1.05127	6.1679	6.92034e-10	7.41254e-09	0.909568	6.31778	2.65351e-10	4.34321e-09
Pacsin1	1.63212	15.8776	9.05295e-57	2.44381e-55	2.02552	12.7685	2.45932e-37	2.13991e-35	2.28112	14.6918	7.27504e-49	2.11568e-46
Smarcc2	1.7837	15.8739	9.61447e-57	2.59077e-55	0.497497	3.17323	0.00150753	0.00589626	1.07446	8.64311	5.47025e-18	1.66033e-16
Bahcc1	2.80054	15.8616	1.169e-56	3.14445e-55	1.96297	8.76118	1.93223e-18	4.49451e-17	1.00714	3.92407	8.70642e-05	0.000646519
Ulk1	2.12223	15.8269	2.02913e-56	5.41951e-55	2.0033	11.2627	2.00544e-29	9.81554e-28	1.3347	6.48054	9.13936e-11	1.55282e-09
Dtx1	1.94759	15.8266	2.03902e-56	5.43631e-55	1.27884	7.98362	1.42098e-15	2.61832e-14	1.26013	6.21164	5.24329e-10	8.3313e-09
Btbd3	2.31612	15.7439	7.56018e-56	1.99107e-54	1.80272	10.6061	2.79281e-26	1.11839e-24	1.78012	6.40118	1.5418e-10	2.58103e-09
Ube2v1	1.78196	15.7331	8.96565e-56	2.35302e-54	0.882661	5.86304	4.5447e-09	4.44259e-08	1.63643	11.621	3.22428e-31	2.76162e-29
Cbfa2t3	2.04612	15.6831	1.97502e-55	5.16546e-54	1.43818	8.30969	9.59505e-17	1.98026e-15	1.83042	8.88961	6.13262e-19	2.02879e-17
Mpped1	1.87726	15.6626	2.72619e-55	7.11775e-54	1.73175	11.2069	3.7727e-29	1.82749e-27	1.94337	14.6694	1.0118e-48	2.87559e-46
Cep85	3.01863	15.6453	3.57818e-55	9.32611e-54	0.846595	4.52089	6.15789e-06	3.98355e-05	0.911403	4.24468	2.18905e-05	0.000180687
B3gat1	1.68113	15.6192	5.39149e-55	1.398e-53	1.43943	8.43572	3.29173e-17	7.08401e-16	1.86419	11.5226	1.0145e-30	8.18471e-29
Ppard	3.18142	15.6084	6.38103e-55	1.65175e-53	0.671746	3.22034	0.00128037	0.00509473	1.28666	4.865	1.1446e-06	1.16842e-05
Calm1	1.96225	15.5972	7.60513e-55	1.96524e-53	2.05357	14.0611	6.58707e-45	1.05513e-42	2.46543	16.6636	2.41167e-62	2.15414e-59
Mink1	1.57518	15.5105	2.94468e-54	7.5321e-53	2.06466	13.4817	2.00368e-41	2.37343e-39	1.26185	9.41949	4.53285e-21	1.76035e-19
Podxl2	1.71049	15.4903	4.03283e-54	1.02807e-52	1.45075	8.32065	8.74816e-17	1.82011e-15	1.96267	13.7079	9.10967e-43	1.70025e-40
Pum2	1.87224	15.4752	5.10034e-54	1.29801e-52	0.959822	6.78713	1.14383e-11	1.45256e-10	1.71552	8.31455	9.21018e-17	2.57659e-15
Rab11fip3	1.67894	15.4741	5.19211e-54	1.31914e-52	2.41884	16.1085	2.22328e-58	8.95409e-56	1.68812	8.49663	1.9517e-17	5.66266e-16
Gsk3a	1.69375	15.4255	1.10371e-53	2.77156e-52	1.32303	8.49154	2.0391e-17	4.46321e-16	2.00313	12.379	3.39646e-35	3.72568e-33
Hipk1	1.9851	15.4068	1.47227e-53	3.68482e-52	1.27807	8.72208	2.73127e-18	6.29085e-17	0.705388	2.99578	0.00273747	0.0131916
Map1a	1.67918	15.33	4.81618e-53	1.19747e-51	2.62795	18.5265	1.26286e-76	1.48344e-73	0.988195	4.13529	3.54513e-05	0.000283452
Brd2	2.00136	15.3281	4.96412e-53	1.23021e-51	0.57322	3.62633	0.000287476	0.00134806	1.09435	5.6512	1.59334e-08	2.09513e-07
Chmp1a	1.8997	15.2918	8.67138e-53	2.13842e-51	1.3531	8.32057	8.75449e-17	1.82011e-15	1.84785	9.09698	9.28758e-20	3.30887e-18
Bicra	2.37997	15.2903	8.8727e-53	2.1845e-51	1.64115	9.22064	2.95332e-20	7.85473e-19	1.83202	7.00809	2.41591e-12	4.75015e-11
Matk	1.77954	15.2103	3.02107e-52	7.29544e-51	1.61043	9.0146	1.97593e-19	4.89502e-18	2.08498	10.3503	4.17251e-25	2.19696e-23
Gnas	1.68214	15.2014	3.46356e-52	8.33736e-51	1.05279	7.69741	1.38847e-14	2.36672e-13	1.08476	11.0383	2.49781e-28	1.63535e-26
Sh2b3	3.30312	15.1911	4.04855e-52	9.73004e-51	0.834667	4.05098	5.10027e-05	0.000281163	1.43622	5.19002	2.10275e-07	2.41016e-06
Tulp4	2.21294	15.1424	8.50908e-52	2.03531e-50	0.710483	5.0586	4.22341e-07	3.21453e-06	0.345565	1.30695	0.191229	0.3567
Plxnd1	2.10443	15.1417	8.60111e-52	2.05407e-50	1.92956	10.3933	2.65961e-25	1.01324e-23	1.25537	6.3455	2.21703e-10	3.63832e-09
Setd7	1.91839	15.0939	1.77593e-51	4.22118e-50	1.02069	6.22142	4.92671e-10	5.34618e-09	0.695104	3.92051	8.83631e-05	0.000654998
Mcrs1	1.95358	15.0581	3.05535e-51	7.20557e-50	1.83791	10.1093	5.02671e-24	1.77141e-22	1.73597	10.3701	3.39143e-25	1.81238e-23
Ppp1r12c	1.94162	15.021	5.34755e-51	1.25721e-49	1.13314	6.47997	9.17419e-11	1.07052e-09	1.61085	9.54316	1.38552e-21	5.68062e-20
Golga7b	1.89499	15.0159	5.77486e-51	1.35347e-49	0.876073	4.84199	1.28545e-06	9.13753e-06	1.85978	10.6725	1.36845e-26	8.07193e-25
Mast3	1.58035	14.9843	9.30621e-51	2.17102e-49	2.60073	16.4329	1.11141e-60	5.59518e-58	2.10774	11.3843	5.00884e-30	3.72537e-28
Fbrsl1	2.15194	14.9491	1.57923e-50	3.66153e-49	0.976147	5.66467	1.47307e-08	1.35097e-07	0.733675	4.60895	4.04703e-06	3.85439e-05
Zfr2	2.33986	14.9239	2.303e-50	5.33146e-49	1.40906	7.66007	1.85826e-14	3.11833e-13	2.12334	9.54261	1.39282e-21	5.6919e-20
Arhgap35	1.62602	14.8822	4.3008e-50	9.86574e-49	1.52483	9.1414	6.16462e-20	1.5857e-18	1.08207	7.48721	7.03524e-14	1.54073e-12
Grk3	2.4805	14.8475	7.21781e-50	1.6507e-48	0.615187	4.17017	3.04372e-05	0.000175334	0.605978	3.53837	0.000402608	0.00253811
Ncdn	1.42113	14.8443	7.56906e-50	1.72581e-48	2.88186	19.8171	2.12081e-87	5.97897e-84	2.66308	17.1428	7.1089e-66	1.11121e-62
Syt7	1.68956	14.7946	1.58722e-49	3.58654e-48	1.84836	12.5561	3.67918e-36	2.94669e-34	1.99167	10.2441	1.25757e-24	6.24043e-23
Ctbp1	1.60666	14.7525	2.96384e-49	6.63767e-48	1.25749	7.95595	1.77759e-15	3.24993e-14	1.06052	8.76531	1.86263e-18	5.97237e-17
Hrk	2.2311	14.7164	5.05991e-49	1.12652e-47	0.962553	5.54266	2.97912e-08	2.64945e-07	1.31637	6.62906	3.37839e-11	5.95864e-10
Plcd3	3.46942	14.6816	8.45286e-49	1.87089e-47	2.1671	9.2157	3.09244e-20	8.20923e-19	2.0134	5.57395	2.4903e-08	3.21707e-07
Cit	2.96355	14.6717	9.78661e-49	2.15977e-47	0.571724	2.74341	0.00608056	0.0199237	0.666885	2.35051	0.0187475	0.0636713
C1qtnf4	1.45139	14.6654	1.07313e-48	2.3648e-47	2.87579	14.7191	4.86058e-49	1.00757e-46	1.97051	11.1393	8.07844e-29	5.46059e-27
Ptpn1	2.11836	14.661	1.14578e-48	2.51389e-47	1.13215	6.43332	1.24845e-10	1.43775e-09	1.32643	6.73878	1.59724e-11	2.90734e-10
Ralgds	1.82498	14.6202	2.08691e-48	4.55235e-47	1.12262	6.70516	2.01186e-11	2.49421e-10	1.04832	5.20928	1.8957e-07	2.18486e-06
Rhot2	1.97105	14.4739	1.77174e-47	3.79368e-46	0.794374	4.76668	1.87282e-06	1.30625e-05	1.07117	6.83721	8.07477e-12	1.51387e-10
Smarcd3	1.85263	14.465	2.01639e-47	4.31143e-46	1.26828	6.81361	9.51817e-12	1.22416e-10	1.79467	9.82094	9.14871e-23	4.02833e-21
Nr1h2	2.44148	14.4596	2.18094e-47	4.65011e-46	0.709268	3.83067	0.000127794	0.000649148	1.45368	6.3319	2.42159e-10	3.9688e-09
Gse1	1.81424	14.4485	2.56093e-47	5.45262e-46	2.22218	12.374	3.61449e-35	2.7101e-33	1.52017	6.25895	3.87581e-10	6.24575e-09
Ap3s2	2.03264	14.4438	2.74207e-47	5.8219e-46	1.15947	7.32476	2.39331e-13	3.61858e-12	1.08847	5.82302	5.77944e-09	8.12044e-08
Mcf2l	2.05803	14.4348	3.12758e-47	6.62179e-46	1.49844	8.59438	8.37173e-18	1.88042e-16	1.24204	7.10004	1.24721e-12	2.49542e-11
Samd1	2.35919	14.4148	4.17847e-47	8.8344e-46	1.59139	7.84418	4.35808e-15	7.72723e-14	2.09825	8.04256	8.79822e-16	2.22716e-14
Adgrl1	1.47555	14.4145	4.1954e-47	8.8578e-46	1.76576	12.8231	1.21735e-37	1.09298e-35	1.42053	8.22771	1.9082e-16	5.15378e-15
Cacna1i	1.86594	14.3897	6.00433e-47	1.26241e-45	2.67752	15.7524	6.6165e-56	2.22062e-53	2.21567	9.99546	1.59552e-23	7.28173e-22
Kcnq2	1.555	14.3509	1.05129e-46	2.2042e-45	2.34675	14.5206	8.96934e-48	1.68576e-45	1.82819	11.2966	1.3641e-29	9.69209e-28
Ctif	1.94743	14.3352	1.31805e-46	2.75968e-45	1.59585	9.43849	3.78204e-21	1.08578e-19	1.13747	5.65572	1.55195e-08	2.045e-07
Mgat5b	2.36528	14.3017	2.13572e-46	4.45935e-45	1.19431	6.68123	2.36938e-11	2.92459e-10	1.24859	5.66196	1.49655e-08	1.98246e-07
Sema6b	1.47772	14.3009	2.15909e-46	4.50192e-45	2.39836	13.5536	7.54304e-42	9.66606e-40	1.79647	10.3203	5.707e-25	2.96124e-23
Tmem250-ps	2.12783	14.2925	2.43611e-46	5.07255e-45	0.621733	3.90121	9.57113e-05	0.000499129	1.85059	8.53504	1.40107e-17	4.11275e-16
Kbtbd11	1.64556	14.2751	3.12678e-46	6.49279e-45	1.99912	11.0666	1.8218e-28	8.50333e-27	1.52861	7.47343	7.81288e-14	1.70506e-12
Rapgefl1	1.64496	14.2649	3.62259e-46	7.49147e-45	2.3939	13.5112	1.34399e-41	1.6055e-39	2.43902	12.4187	2.06798e-35	2.35091e-33
Lzts3	1.4778	14.2153	7.3621e-46	1.51625e-44	2.17876	13.4327	3.88728e-41	4.34882e-39	2.47175	13.9228	4.60587e-44	9.14229e-42
Mturn	2.14007	14.1025	3.66667e-45	7.46017e-44	0.562407	3.5251	0.000423322	0.00189614	1.51058	9.43784	3.80531e-21	1.49171e-19
Nrxn2	1.33681	14.1005	3.77215e-45	7.66446e-44	0.763311	5.52163	3.35876e-08	2.96649e-07	0.176305	1.66946	0.0950272	0.21784
Anapc5	1.90453	14.0467	8.06564e-45	1.63224e-43	1.2831	7.4603	8.63243e-14	1.34456e-12	1.43581	10.3603	3.75904e-25	2.00029e-23
Arf3	1.70513	14.0227	1.13224e-44	2.28215e-43	1.65514	10.6251	2.27856e-26	9.22948e-25	2.04498	15.7371	8.41991e-56	3.39648e-53
Zfp316	2.22005	13.9916	1.75513e-44	3.51887e-43	1.88842	9.26037	2.03718e-20	5.50116e-19	1.13949	5.59206	2.24393e-08	2.91083e-07
Cntnap1	1.66653	13.9793	2.08399e-44	4.16716e-43	1.43115	8.94433	3.74205e-19	9.09782e-18	1.19842	7.87645	3.36801e-15	8.19395e-14
Gpr27	2.67876	13.8976	6.54783e-44	1.29221e-42	1.5514	6.69479	2.15986e-11	2.67534e-10	1.98329	7.69925	1.36869e-14	3.21116e-13
Tbc1d9b	2.05542	13.893	6.98891e-44	1.37567e-42	0.405445	2.51805	0.0118006	0.034888	0.857113	4.79332	1.64045e-06	1.65035e-05
Ctnnd2	1.78026	13.8778	8.64101e-44	1.69644e-42	1.4179	9.47246	2.73319e-21	7.96013e-20	1.20359	7.87813	3.32315e-15	8.10059e-14
Larp1	1.60658	13.7764	3.53554e-43	6.8259e-42	1.78775	11.6335	2.78555e-31	1.5706e-29	1.50135	9.97561	1.94896e-23	8.83032e-22
Dohh	1.83404	13.7392	5.91228e-43	1.1371e-41	1.20055	6.40447	1.50888e-10	1.7257e-09	2.03492	9.5258	1.63769e-21	6.67079e-20
Insyn1	1.63482	13.7305	6.66309e-43	1.27987e-41	0.486249	2.82813	0.00468203	0.0159108	1.35494	7.87824	3.32025e-15	8.10059e-14
Nf2	1.81513	13.7247	7.22657e-43	1.38459e-41	0.844822	5.70564	1.15908e-08	1.07348e-07	1.17551	6.697	2.12746e-11	3.83342e-10
Brsk2	1.53599	13.7235	7.33909e-43	1.40437e-41	1.30425	7.56215	3.96457e-14	6.40878e-13	1.64092	9.78443	1.31332e-22	5.74231e-21
Rasgef1a	1.63962	13.6897	1.16969e-42	2.23543e-41	1.25592	7.99615	1.28368e-15	2.37776e-14	2.0948	13.0062	1.12829e-38	1.64062e-36
C1ql2	6.63842	13.6377	2.39067e-42	4.55735e-41	2.14883	8.68613	3.75002e-18	8.60916e-17	2.69877	4.45603	8.34914e-06	7.46824e-05
Sirt3	2.31319	13.6041	3.78571e-42	7.19856e-41	0.451891	2.38834	0.0169245	0.0469702	1.57726	7.15627	8.29005e-13	1.67475e-11
Rnf187	1.48835	13.5929	4.40973e-42	8.37461e-41	1.4858	9.19853	3.62893e-20	9.52576e-19	2.06326	11.8025	3.789e-32	3.43344e-30
Crlf2	3.03298	13.5098	1.3695e-41	2.57176e-40	1.46987	6.45489	1.08296e-10	1.25332e-09	1.56184	4.88286	1.04557e-06	1.07347e-05
Dctn1	1.45527	13.4489	3.12419e-41	5.8163e-40	1.88902	11.2408	2.56931e-29	1.24886e-27	1.8174	9.70262	2.93868e-22	1.27598e-20
Keap1	1.81003	13.4484	3.14579e-41	5.84932e-40	1.29762	7.00173	2.52826e-12	3.44333e-11	1.28834	7.16979	7.51116e-13	1.52727e-11
Abl1	2.01876	13.3165	1.85594e-40	3.40488e-39	1.07183	5.53255	3.15615e-08	2.79806e-07	0.824532	3.78016	0.000156727	0.00109674
Tbc1d22a	2.04715	13.3053	2.15677e-40	3.952e-39	1.48186	7.95407	1.80483e-15	3.29118e-14	1.51787	7.06981	1.55144e-12	3.08438e-11
Wnk2	1.45161	13.295	2.47352e-40	4.5269e-39	1.05155	6.86629	6.58939e-12	8.61634e-11	0.987144	5.42238	5.88109e-08	7.25992e-07
Orai2	1.52003	13.2418	5.03321e-40	9.15609e-39	1.00234	6.24974	4.11141e-10	4.49957e-09	2.05018	10.3755	3.20503e-25	1.72754e-23
Map2	1.55864	13.231	5.80812e-40	1.05531e-38	1.80275	12.3347	5.89126e-35	4.3707e-33	2.40245	9.96644	2.13761e-23	9.65011e-22
Scn1b	1.28031	13.1963	9.21252e-40	1.66387e-38	1.57399	10.8759	1.50105e-27	6.63287e-26	2.23134	12.0339	2.3562e-33	2.30189e-31
Adarb1	1.86045	13.1575	1.5418e-39	2.76482e-38	0.72827	4.21373	2.51184e-05	0.000146673	0.808684	4.57417	4.78104e-06	4.45838e-05
Zfp106	1.80198	13.1395	1.9548e-39	3.48475e-38	0.408368	2.71104	0.00670717	0.02162	0.631152	3.58104	0.000342232	0.00219355
Kctd17	1.80586	13.07	4.88903e-39	8.68477e-38	1.18243	7.03515	1.99047e-12	2.74726e-11	1.41362	9.00606	2.13585e-19	7.4191e-18
Kmt2d	1.42287	13.0468	6.63038e-39	1.17505e-37	1.87993	10.8677	1.64341e-27	7.19427e-26	1.20845	5.55396	2.79274e-08	3.59662e-07
Mafg	2.53889	13.0077	1.10617e-38	1.95121e-37	1.27903	6.13023	8.77543e-10	9.25195e-09	1.57787	5.96077	2.51057e-09	3.70221e-08
Tsc2	1.63701	12.9811	1.56715e-38	2.75153e-37	1.61769	9.35599	8.28207e-21	2.31176e-19	0.998799	5.38988	7.05032e-08	8.60979e-07
1700008O03Rik	3.2502	12.9605	2.05009e-38	3.59526e-37	1.41707	5.21046	1.88372e-07	1.50608e-06	1.52506	3.87597	0.000106201	0.000773021
Megf8	1.28646	12.9257	3.22365e-38	5.62725e-37	2.08664	14.5723	4.21337e-48	8.0259e-46	0.994021	6.75041	1.47429e-11	2.69533e-10
Ipo13	1.55218	12.9057	4.17928e-38	7.23691e-37	1.42823	7.88516	3.14129e-15	5.61925e-14	0.783323	3.49277	0.000478036	0.00294185
Jund	1.43718	12.8269	1.15931e-37	1.97802e-36	0.818746	5.09848	3.42394e-07	2.63593e-06	1.65619	9.54677	1.33808e-21	5.50417e-20
Fam89b	2.03556	12.7934	1.78504e-37	3.02516e-36	1.14875	5.7167	1.08612e-08	1.01257e-07	1.35587	5.16588	2.39305e-07	2.718e-06
Egln2	1.73184	12.7833	2.03233e-37	3.4327e-36	0.435566	2.48067	0.0131136	0.0381525	1.43984	8.29995	1.04159e-16	2.88805e-15
Bicdl1	2.7525	12.7626	2.65307e-37	4.46123e-36	1.01816	4.18361	2.86919e-05	0.00016589	1.61649	5.62111	1.89735e-08	2.47407e-07
Man2a2	1.44202	12.745	3.32283e-37	5.57505e-36	1.40261	9.28062	1.68499e-20	4.60304e-19	0.837792	4.63993	3.48532e-06	3.35261e-05
Trmt1	2.18241	12.6792	7.71507e-37	1.28023e-35	1.38002	6.92308	4.41919e-12	5.87668e-11	1.53715	7.31799	2.51717e-13	5.28142e-12
6530402F18Rik	3.37872	12.6641	9.34348e-37	1.54535e-35	1.32983	5.51543	3.47921e-08	3.06902e-07	1.23511	3.92271	8.75593e-05	0.00064981
Prr12	1.47325	12.6379	1.30447e-36	2.15045e-35	1.75965	11.3102	1.16878e-29	5.82161e-28	1.66796	8.24972	1.58771e-16	4.31616e-15
Aff3	1.66498	12.6311	1.42235e-36	2.34222e-35	1.46722	8.27495	1.28515e-16	2.62543e-15	1.23797	5.88967	3.86964e-09	5.5493e-08
Myo7a	2.78405	12.5842	2.57849e-36	4.22308e-35	1.10779	4.95341	7.29224e-07	5.39021e-06	0.825575	3.18465	0.0014493	0.00765999
Phc1	2.10658	12.5792	2.74763e-36	4.49523e-35	0.518846	2.81233	0.00491836	0.0166058	1.36955	5.83236	5.465e-09	7.68727e-08
Ttc7b	1.75751	12.5765	2.84433e-36	4.6484e-35	1.04855	6.06784	1.2964e-09	1.33974e-08	1.47464	10.0336	1.08444e-23	5.00403e-22
Rab43	2.60785	12.571	3.04878e-36	4.96643e-35	0.74563	3.71493	0.000203259	0.000980878	1.13043	4.21386	2.51047e-05	0.000205186
Extl1	1.49876	12.544	4.28566e-36	6.96628e-35	2.17487	12.6153	1.73861e-36	1.41662e-34	1.85781	10.3402	4.63678e-25	2.42607e-23
Ehd1	1.6794	12.5119	6.43017e-36	1.03876e-34	1.33688	8.02626	1.00486e-15	1.88609e-14	1.10644	5.98858	2.11677e-09	3.13628e-08
Iqsec1	1.50942	12.4949	7.95758e-36	1.27837e-34	1.37408	8.23126	1.85251e-16	3.72511e-15	1.07817	5.51261	3.53542e-08	4.47927e-07
Vps51	1.58356	12.4776	9.89711e-36	1.58322e-34	1.97065	10.2659	1.00367e-24	3.65573e-23	1.59923	6.13874	8.31778e-10	1.2889e-08
Lynx1	1.38479	12.47	1.08847e-35	1.7357e-34	1.14846	7.24159	4.43464e-13	6.55248e-12	1.63922	13.8444	1.37592e-43	2.68843e-41
Snx27	1.57091	12.4374	1.63785e-35	2.6002e-34	1.35949	8.34324	7.22796e-17	1.5139e-15	1.44847	6.58077	4.68028e-11	8.17416e-10
Zer1	1.34332	12.4208	2.01526e-35	3.18003e-34	2.07632	12.3285	6.36273e-35	4.69576e-33	1.29536	7.16093	8.01297e-13	1.62139e-11
Dync1h1	1.40097	12.4009	2.58428e-35	4.06943e-34	1.45455	10.9149	9.7843e-28	4.39234e-26	0.168704	0.843414	0.398997	0.587548
Stum	1.38361	12.3859	3.11422e-35	4.88357e-34	1.4371	9.90617	3.91347e-23	1.31031e-21	1.9886	11.8689	1.71776e-32	1.57945e-30
Fastk	1.8985	12.3776	3.45467e-35	5.41183e-34	0.645517	3.56138	0.000368906	0.00167962	1.20736	6.07086	1.27225e-09	1.93782e-08
Sh3pxd2a	1.86053	12.377	3.48249e-35	5.44978e-34	1.70343	9.76837	1.5391e-22	4.95322e-21	1.0709	5.54638	2.91651e-08	3.74445e-07
9330102E08Rik	2.28869	12.3763	3.51307e-35	5.48626e-34	1.43524	6.47797	9.29624e-11	1.08387e-09	1.27352	4.93099	8.18156e-07	8.5401e-06
Rab11fip5	1.76729	12.3444	5.22176e-35	8.12948e-34	1.31249	7.56238	3.9575e-14	6.4047e-13	1.38418	7.28745	3.15872e-13	6.53971e-12
Sox11	2.49422	12.3265	6.51917e-35	1.01285e-33	0.872545	4.12455	3.71457e-05	0.000210199	0.604679	2.35674	0.0184362	0.0629732
Gpr137	1.92287	12.3092	8.08391e-35	1.25081e-33	0.708107	3.9759	7.01134e-05	0.000375501	1.34769	6.77734	1.22409e-11	2.25437e-10
Dusp7	1.53143	12.3045	8.56829e-35	1.32441e-33	1.27969	7.57798	3.50966e-14	5.72595e-13	1.26146	7.35239	1.94699e-13	4.13364e-12
Map3k9	2.24083	12.283	1.11749e-34	1.71853e-33	1.30087	6.95471	3.53297e-12	4.74745e-11	1.1334	4.53261	5.82594e-06	5.35293e-05
Nol4l	2.04093	12.2433	1.82351e-34	2.77325e-33	1.42157	7.4231	1.14408e-13	1.77219e-12	1.25096	5.54168	2.99586e-08	3.84239e-07
Fam57b	1.90594	12.2153	2.57553e-34	3.90875e-33	1.07515	5.63889	1.71146e-08	1.55945e-07	1.88144	8.469	2.47516e-17	7.14823e-16
Pcif1	1.98653	12.1647	4.79468e-34	7.20489e-33	0.85903	4.53002	5.89769e-06	3.82752e-05	0.869509	3.74986	0.000176935	0.00121838
Cbx7	2.06034	12.1543	5.4413e-34	8.13611e-33	0.988151	5.18216	2.19331e-07	1.73301e-06	1.48839	6.03447	1.59484e-09	2.40573e-08
Btbd9	1.27448	12.1536	5.4876e-34	8.19724e-33	1.78371	11.1957	4.27864e-29	2.06547e-27	1.2873	8.22448	1.96035e-16	5.26055e-15
Cdc42bpa	1.3919	12.1282	7.48855e-34	1.11312e-32	0.799468	6.11052	9.93042e-10	1.03919e-08	0.664413	2.95648	0.0031117	0.0147226
Mecp2	1.71601	12.1077	9.61799e-34	1.42405e-32	1.19283	7.52998	5.0747e-14	8.11031e-13	1.13293	6.79756	1.06405e-11	1.98004e-10
Rab15	1.66187	12.1038	1.00809e-33	1.49113e-32	0.787705	4.94448	7.63466e-07	5.62562e-06	1.68916	8.74189	2.29248e-18	7.25758e-17
Pou3f1	1.17167	12.084	1.28326e-33	1.89629e-32	2.78578	16.1146	2.01578e-58	8.35719e-56	2.65994	14.585	3.49806e-48	9.30708e-46
Atp9a	1.26719	12.059	1.73801e-33	2.56077e-32	1.93177	10.9363	7.72621e-28	3.49066e-26	1.66148	11.3647	6.2645e-30	4.50216e-28
Miga1	1.53601	12.053	1.87016e-33	2.74744e-32	0.965129	6.11981	9.36857e-10	9.82584e-09	0.671067	3.98774	6.67071e-05	0.000508022
Tgfb1i1	3.01176	12.0108	3.11748e-33	4.55332e-32	1.19458	4.72624	2.28711e-06	1.5819e-05	2.07531	5.14017	2.74483e-07	3.07564e-06
Nat8l	1.238	11.9652	5.40711e-33	7.85199e-32	1.57923	9.58105	9.60634e-22	2.8934e-20	1.88513	10.1764	2.52648e-24	1.21983e-22
Cbarp	1.21625	11.9616	5.64319e-33	8.1791e-32	1.73123	10.5091	7.84417e-26	3.10594e-24	1.82403	11.6354	2.72232e-31	2.34777e-29
Dyrk1b	2.14512	11.9569	5.9752e-33	8.64374e-32	1.77333	7.25332	4.06688e-13	6.02804e-12	0.278775	1.02464	0.305534	0.491788
Cdk10	1.88272	11.9547	6.13452e-33	8.85727e-32	0.528727	2.90448	0.00367858	0.0129471	1.46825	6.19219	5.93324e-10	9.37992e-09
Diras1	1.58742	11.9471	6.72015e-33	9.6751e-32	0.978875	6.08406	1.17177e-09	1.2163e-08	0.93479	5.72578	1.02961e-08	1.40101e-07
Npas2	1.98648	11.934	7.87404e-33	1.13148e-31	1.39757	6.42519	1.31705e-10	1.51305e-09	1.51315	5.22658	1.72673e-07	2.0049e-06
Limk2	1.79808	11.9182	9.51726e-33	1.36501e-31	1.41666	8.03798	9.13343e-16	1.72119e-14	1.30755	7.37598	1.63144e-13	3.50536e-12
Zfand2a	1.97779	11.8998	1.18578e-32	1.68949e-31	0.596809	3.33088	0.000865731	0.00360299	1.49173	5.2751	1.32687e-07	1.57424e-06
Capn5	1.75567	11.8867	1.38783e-32	1.9755e-31	1.61229	7.88249	3.20911e-15	5.73328e-14	1.39589	6.41719	1.38817e-10	2.3332e-09
Gigyf1	1.92359	11.8779	1.54244e-32	2.19351e-31	1.24619	6.48978	8.59614e-11	1.00808e-09	0.824787	3.87677	0.000105852	0.000770926
Jak3	3.63431	11.8537	2.05957e-32	2.92069e-31	1.70541	6.40441	1.5095e-10	1.7257e-09	1.07868	3.29723	0.000976441	0.00546571
Zfp236	2.15005	11.836	2.54203e-32	3.59811e-31	1.1968	5.41474	6.1379e-08	5.24045e-07	1.13119	4.29933	1.71319e-05	0.000144168
Chtf8	1.64899	11.7991	3.94552e-32	5.53288e-31	1.66929	9.5895	8.85088e-22	2.6773e-20	1.92939	9.42369	4.35493e-21	1.69652e-19
Pkp4	1.38019	11.7991	3.9436e-32	5.53288e-31	0.756749	4.80374	1.55727e-06	1.09756e-05	1.41133	8.94467	3.73057e-19	1.27461e-17
Carm1	1.53909	11.7728	5.38942e-32	7.5228e-31	1.23337	7.08954	1.34561e-12	1.89868e-11	0.924619	5.86778	4.41679e-09	6.30503e-08
Srebf2	1.4415	11.7582	6.40548e-32	8.92457e-31	0.669059	3.81154	0.000138101	0.000693754	1.18288	6.39776	1.5767e-10	2.6324e-09
Ap2a2	1.34071	11.703	1.23049e-31	1.69876e-30	2.02265	12.111	9.23632e-34	6.19977e-32	1.3955	8.05321	8.06488e-16	2.054e-14
Foxk2	1.68434	11.7015	1.25165e-31	1.72639e-30	1.25939	6.58255	4.62455e-11	5.57636e-10	1.64212	9.57651	1.00381e-21	4.21231e-20
Stx1b	1.66156	11.6923	1.39484e-31	1.92213e-30	1.15038	5.48555	4.12175e-08	3.59976e-07	2.06707	6.17694	6.53556e-10	1.02544e-08
Fcho1	1.76734	11.683	1.55771e-31	2.13683e-30	1.85277	8.74182	2.2938e-18	5.31799e-17	1.70748	7.4614	8.5606e-14	1.86499e-12
Ndst1	1.84393	11.6627	1.97581e-31	2.70058e-30	0.817554	4.467	7.93224e-06	5.04343e-05	0.957311	3.85751	0.000114549	0.000826563
Cyhr1	1.41859	11.6388	2.61706e-31	3.56415e-30	0.637676	4.20551	2.60498e-05	0.000151547	0.953297	6.8773	6.09989e-12	1.15574e-10
Ank1	2.07978	11.5564	6.85221e-31	9.25691e-30	1.1667	5.69619	1.22514e-08	1.13169e-07	0.765347	3.71382	0.000204151	0.00138219
Sema6c	1.94889	11.5561	6.8779e-31	9.28333e-30	1.75484	9.00752	2.10767e-19	5.21223e-18	1.18434	4.95601	7.19568e-07	7.54249e-06
Ccdc85b	1.57905	11.5526	7.16261e-31	9.65898e-30	0.709443	3.60213	0.000315622	0.00145773	1.6688	8.88181	6.57829e-19	2.17049e-17
Rab1b	1.28701	11.5411	8.18461e-31	1.10077e-29	0.936276	5.62238	1.88344e-08	1.71063e-07	0.676994	4.05587	4.99474e-05	0.000389397
Klhl29	1.76676	11.437	2.7308e-30	3.62755e-29	1.54434	7.54628	4.47882e-14	7.20701e-13	1.15718	5.0614	4.16196e-07	4.54941e-06
Ncaph2	1.40396	11.4354	2.78196e-30	3.68904e-29	1.15541	6.91771	4.58993e-12	6.08651e-11	1.34678	8.22679	1.92305e-16	5.18271e-15
Mn1	1.66826	11.3927	4.54605e-30	5.98348e-29	2.63503	11.904	1.12795e-32	6.88294e-31	1.89217	5.27563	1.32303e-07	1.57118e-06
Zfp777	1.75233	11.3672	6.09266e-30	7.97426e-29	1.75732	9.29533	1.46752e-20	4.04027e-19	1.89806	8.06954	7.05619e-16	1.81933e-14
Dhx34	2.74252	11.3453	7.82281e-30	1.01509e-28	0.943379	3.70933	0.000207812	0.00100007	0.7336	2.6111	0.00902518	0.0357717
Mark2	1.37169	11.3316	9.15005e-30	1.18527e-28	1.31909	7.51571	5.66008e-14	9.01519e-13	1.2779	8.06264	7.46634e-16	1.91718e-14
Inafm2	1.55755	11.3178	1.07113e-29	1.38396e-28	1.17635	6.99013	2.7463e-12	3.72587e-11	2.05984	8.62914	6.18125e-18	1.86707e-16
Pbx1	1.45819	11.2546	2.19803e-29	2.81829e-28	1.05371	6.93777	3.98351e-12	5.33253e-11	0.904044	7.36462	1.77655e-13	3.79756e-12
Kcnmb4	2.05305	11.2491	2.33892e-29	2.99132e-28	0.504015	2.4173	0.015636	0.0440897	1.47928	6.19273	5.91313e-10	9.35996e-09
Bean1	2.70144	11.2104	3.62369e-29	4.60331e-28	0.913674	3.73743	0.000185914	0.000905858	1.40772	4.19036	2.78513e-05	0.000226156
Wdr90	3.03315	11.195	4.31472e-29	5.45365e-28	2.58659	8.94429	3.74343e-19	9.09782e-18	1.75676	3.69579	0.000219202	0.00147135
Dop1b	1.51179	11.1907	4.52916e-29	5.71991e-28	1.69798	10.8618	1.7522e-27	7.62316e-26	1.01934	4.43164	9.35186e-06	8.28293e-05
Nomo1	1.43041	11.1681	5.84189e-29	7.35319e-28	1.36188	7.83707	4.6119e-15	8.13634e-14	1.53178	8.86515	7.63995e-19	2.50755e-17
Foxo6	1.69135	11.1369	8.29887e-29	1.03853e-27	2.3266	11.2789	1.6686e-29	8.19534e-28	2.02094	8.23593	1.78169e-16	4.82251e-15
Atxn1	1.55928	11.12	1.00285e-28	1.25291e-27	1.55854	9.13543	6.51485e-20	1.6697e-18	0.849299	3.48197	0.000497736	0.00304213
Rbfox2	1.39468	11.1036	1.20494e-28	1.49918e-27	1.69311	10.324	5.4915e-25	2.04443e-23	1.77856	10.4976	8.85622e-26	4.92209e-24
Tln2	1.70448	11.1016	1.23235e-28	1.52951e-27	2.11261	12.4823	9.33031e-36	7.30667e-34	1.92412	7.66231	1.82622e-14	4.20568e-13
Smg5	1.50456	11.0392	2.47162e-28	3.04263e-27	1.24169	7.28243	3.27858e-13	4.89564e-12	1.06365	5.85937	4.64614e-09	6.60226e-08
2010300C02Rik	1.16169	11.0226	2.97483e-28	3.65614e-27	2.85664	17.7255	2.66322e-70	2.50271e-67	2.24596	8.92803	4.33656e-19	1.46169e-17
Tmem28	2.81433	10.9864	4.44406e-28	5.42656e-27	1.92015	6.82937	8.5289e-12	1.10095e-10	1.91395	4.42616	9.59264e-06	8.45355e-05
Ppm1f	1.81185	10.9832	4.60164e-28	5.61445e-27	1.22859	6.22508	4.81303e-10	5.23896e-09	1.20933	5.31299	1.07843e-07	1.28927e-06
Ctc1	2.01175	10.9351	7.83582e-28	9.51439e-27	1.62532	7.99754	1.26929e-15	2.3573e-14	0.894611	4.15543	3.24677e-05	0.000261099
Dlgap1	1.19948	10.9103	1.02882e-27	1.2472e-26	2.03922	13.6351	2.47803e-42	3.35869e-40	1.44821	9.2327	2.63894e-20	9.85074e-19
Mroh1	1.81264	10.8851	1.35749e-27	1.64301e-26	1.51455	6.46855	9.89483e-11	1.14986e-09	0.826419	3.85537	0.000115553	0.000832849
Slc29a4	2.34192	10.8552	1.88423e-27	2.26964e-26	1.34743	5.89833	3.67195e-09	3.6221e-08	1.57652	4.96273	6.95106e-07	7.30445e-06
Fam53b	2.15372	10.844	2.12926e-27	2.55866e-26	0.672275	2.96597	0.00301731	0.0108666	0.675774	2.56191	0.0104098	0.0400535
Ubr4	1.27953	10.8181	2.82568e-27	3.38477e-26	1.1542	7.82658	5.01331e-15	8.83346e-14	0.246005	1.18091	0.237639	0.416477
Scyl1	1.61004	10.8054	3.24714e-27	3.88346e-26	0.877383	5.03364	4.81257e-07	3.64133e-06	0.465534	2.57405	0.0100515	0.0389267
Ncor2	1.09869	10.803	3.32989e-27	3.97928e-26	1.80284	10.8661	1.67234e-27	7.29825e-26	1.37005	9.22014	2.96717e-20	1.10102e-18
Fbxw5	1.396	10.7512	5.85121e-27	6.95383e-26	0.996327	5.71087	1.12403e-08	1.04308e-07	1.0294	6.2214	4.9275e-10	7.83949e-09
Hr	3.09855	10.7443	6.30576e-27	7.48227e-26	0.832375	3.38327	0.000716295	0.00304032	0.395346	1.26409	0.206199	0.375988
Rgl2	2.67556	10.743	6.39328e-27	7.58017e-26	0.87943	3.52071	0.000430396	0.00192415	0.535403	1.55443	0.120082	0.25748
Pgs1	1.61456	10.7326	7.15239e-27	8.47356e-26	0.789494	4.23582	2.27718e-05	0.000134025	1.28319	6.80353	1.02088e-11	1.90256e-10
Sh3rf3	2.11476	10.7323	7.17549e-27	8.49427e-26	1.36367	6.02504	1.69063e-09	1.72066e-08	1.22006	4.08037	4.49635e-05	0.000353405
Spef1	2.72728	10.7249	7.776e-27	9.18358e-26	0.763597	3.23065	0.00123508	0.00493471	0.782913	2.71786	0.0065705	0.0275996
Ppp2r5b	1.37511	10.7008	1.00893e-26	1.18416e-25	1.02488	5.96077	2.51046e-09	2.52047e-08	1.46193	8.04389	8.70316e-16	2.20757e-14
Phrf1	1.6129	10.6974	1.04666e-26	1.22749e-25	2.12132	11.5174	1.07795e-30	5.75558e-29	1.10094	5.58401	2.35031e-08	3.04251e-07
Otud7a	1.56798	10.6915	1.11589e-26	1.30464e-25	1.95684	10.2806	8.61695e-25	3.15492e-23	1.64807	5.81987	5.88921e-09	8.23764e-08
Kansl3	1.67891	10.6676	1.44381e-26	1.68411e-25	0.929923	5.30418	1.13181e-07	9.36816e-07	1.09628	5.09112	3.55948e-07	3.93209e-06
Celf3	1.26249	10.6475	1.79101e-26	2.08428e-25	1.6639	10.4037	2.38581e-25	9.13869e-24	2.16364	7.35206	1.95174e-13	4.13669e-12
Btbd6	1.56865	10.6422	1.89524e-26	2.20049e-25	1.12945	6.24918	4.12617e-10	4.51222e-09	1.93052	7.42418	1.13478e-13	2.4551e-12
Rbm15b	1.77847	10.6392	1.95703e-26	2.26874e-25	1.62563	8.10991	5.06568e-16	9.68871e-15	1.49703	6.04802	1.46635e-09	2.21726e-08
Ap2a1	1.05681	10.6163	2.50279e-26	2.89256e-25	1.87581	12.7077	5.35727e-37	4.52192e-35	1.11332	8.59574	8.27312e-18	2.4691e-16
Itpk1	1.6383	10.6133	2.58416e-26	2.98204e-25	1.07809	5.90685	3.48712e-09	3.44944e-08	0.78868	4.17584	2.96888e-05	0.000239986
Aplp1	1.01346	10.5999	2.98456e-26	3.43622e-25	1.59883	11.3716	5.79234e-30	2.91603e-28	1.42154	13.1753	1.21788e-39	1.9037e-37
Rusc2	1.22101	10.5765	3.8298e-26	4.39265e-25	2.28367	13.522	1.15945e-41	1.42119e-39	1.23082	7.16268	7.9116e-13	1.60348e-11
Ksr2	2.16468	10.5624	4.45124e-26	5.09382e-25	1.75052	6.44175	1.18107e-10	1.36127e-09	1.15803	2.86318	0.00419409	0.0188727
Tubg2	1.61122	10.5266	6.51115e-26	7.42861e-25	1.58843	8.1088	5.11241e-16	9.76485e-15	2.09418	7.32014	2.47713e-13	5.20615e-12
Snx21	1.97343	10.4913	9.46813e-26	1.07535e-24	0.909528	4.24243	2.21112e-05	0.000130301	1.38585	5.21791	1.80955e-07	2.09135e-06
Sipa1l3	1.19455	10.3702	3.38906e-25	3.80344e-24	2.49602	14.9791	1.0062e-50	2.44542e-48	1.86704	10.4536	1.41106e-25	7.80763e-24
4933409K07Rik	1.92951	10.3562	3.92373e-25	4.39696e-24	0.789223	4.23557	2.27969e-05	0.000134117	0.729729	2.73069	0.00632015	0.0267185
Asphd2	1.35759	10.3442	4.44651e-25	4.97174e-24	1.13006	6.26713	3.67767e-10	4.04057e-09	1.85063	8.73527	2.43077e-18	7.63739e-17
Cdh22	1.978	10.3232	5.53743e-25	6.17781e-24	1.99085	9.05948	1.31071e-19	3.2875e-18	1.9423	6.60158	4.06794e-11	7.13459e-10
Neurl4	1.23485	10.292	7.65996e-25	8.49564e-24	1.69262	9.89359	4.43808e-23	1.47894e-21	1.44235	7.59787	3.01055e-14	6.77104e-13
Unc80	1.4097	10.2871	8.05579e-25	8.92811e-24	1.19956	6.7326	1.66663e-11	2.0864e-10	1.62172	7.10075	1.24079e-12	2.48656e-11
Spns2	1.50389	10.2829	8.41574e-25	9.31338e-24	1.0776	6.08634	1.1552e-09	1.19998e-08	1.49108	6.50496	7.77127e-11	1.33123e-09
Tcf25	1.11846	10.2716	9.45885e-25	1.04448e-23	1.42419	9.11776	7.66947e-20	1.95142e-18	1.50138	11.0259	2.86648e-28	1.86694e-26
Fkbp8	1.11362	10.2607	1.05976e-24	1.16852e-23	1.03639	6.20492	5.47245e-10	5.90656e-09	1.5928	10.5642	4.36575e-26	2.44815e-24
Adora1	1.25705	10.2306	1.44609e-24	1.58755e-23	1.67468	10.748	6.05488e-27	2.53263e-25	1.83997	10.2394	1.32013e-24	6.52501e-23
Tspoap1	1.26631	10.2037	1.90857e-24	2.08016e-23	1.67292	10.7126	8.88646e-27	3.66268e-25	1.85783	7.75059	9.1463e-15	2.17442e-13
Tmem94	1.42268	10.1762	2.53316e-24	2.74704e-23	0.970608	5.59836	2.16391e-08	1.94904e-07	0.685975	3.80639	0.00014101	0.000995817
Ap5z1	2.47211	10.1473	3.4083e-24	3.68023e-23	1.30898	5.26524	1.40004e-07	1.14339e-06	0.6161	2.15131	0.0314516	0.0955081
Ltk	2.15915	10.116	4.69439e-24	5.03655e-23	2.58464	9.40655	5.12693e-21	1.4425e-19	2.82557	6.09314	1.1072e-09	1.69676e-08
Rnf123	1.57567	10.1032	5.34536e-24	5.71874e-23	1.67338	7.51515	5.68442e-14	9.04375e-13	1.10182	5.40487	6.48568e-08	7.95911e-07
Tuba1b	0.967437	10.1021	5.40726e-24	5.78087e-23	1.09328	8.10333	5.34728e-16	1.01996e-14	0.335492	3.29377	0.000988525	0.00552593
Ipo9	1.54686	10.0847	6.4533e-24	6.87972e-23	0.705648	4.06695	4.76315e-05	0.000263817	1.10674	4.09905	4.14848e-05	0.000328542
Ttll3	3.02504	10.0807	6.72344e-24	7.16267e-23	1.74552	5.8905	3.85035e-09	3.78747e-08	1.8414	4.38103	1.18119e-05	0.000102433
Armc5	2.2162	10.078	6.91009e-24	7.35632e-23	1.29467	5.31341	1.07594e-07	8.92671e-07	0.675547	2.72411	0.00644759	0.027193
Nfkb2	3.48782	10.0728	7.2879e-24	7.74762e-23	1.64163	5.15432	2.54556e-07	1.99678e-06	0.947831	2.46123	0.0138463	0.0504657
Plod3	1.89004	10.0705	7.4592e-24	7.92416e-23	0.68643	3.49639	0.000471606	0.00208655	0.134748	0.572395	0.567054	0.724429
Slc4a3	1.39462	10.0649	7.89712e-24	8.37172e-23	0.911108	5.21915	1.79743e-07	1.44368e-06	0.824818	4.68081	2.8574e-06	2.78502e-05
Wipf2	1.33526	10.0509	9.10608e-24	9.6129e-23	0.711683	4.53914	5.64839e-06	3.67586e-05	1.42179	8.58704	8.92421e-18	2.64448e-16
Dcaf11	1.52976	10.0005	1.51649e-23	1.58869e-22	0.831436	4.79222	1.64946e-06	1.15848e-05	0.485907	2.83902	0.00452518	0.0201164
Arhgef7	1.3505	9.98819	1.71694e-23	1.79247e-22	1.3999	7.75921	8.54631e-15	1.48178e-13	1.69208	6.96187	3.35797e-12	6.50022e-11
Cacna1a	1.19905	9.97818	1.89914e-23	1.97859e-22	2.03515	11.42	3.3238e-30	1.70372e-28	1.83295	5.74722	9.07204e-09	1.2494e-07
Gm3893	2.74762	9.95807	2.32526e-23	2.41421e-22	1.31035	4.85108	1.22789e-06	8.77705e-06	0.135448	0.268365	0.788418	0.876803
Ksr1	1.29192	9.93204	3.02022e-23	3.12502e-22	2.28591	10.8969	1.19286e-27	5.30429e-26	2.00715	7.38745	1.49671e-13	3.22141e-12
Usp31	1.51793	9.91235	3.67906e-23	3.79374e-22	1.5123	8.68563	3.76645e-18	8.63281e-17	1.15043	4.55141	5.32863e-06	4.92495e-05
Rhbdl1	1.57504	9.90678	3.88983e-23	4.00562e-22	0.835115	4.24396	2.19613e-05	0.000129526	1.37595	5.93066	3.01711e-09	4.3769e-08
Zfp865	1.75087	9.89953	4.18227e-23	4.28923e-22	1.37346	6.04317	1.51119e-09	1.54472e-08	1.79492	5.65648	1.54506e-08	2.03808e-07
Srrm3	1.50988	9.88064	5.05082e-23	5.16249e-22	1.73454	7.6612	1.84203e-14	3.09848e-13	1.95675	7.30625	2.74703e-13	5.73482e-12
Rps6ka2	1.95392	9.87875	5.14691e-23	5.25715e-22	1.71363	7.02721	2.10697e-12	2.89472e-11	1.87413	5.40655	6.42519e-08	7.89263e-07
Ip6k1	1.21367	9.86064	6.16578e-23	6.28087e-22	1.53682	10.2734	9.28253e-25	3.38981e-23	1.29174	7.49407	6.67694e-14	1.46483e-12
Mapk8ip2	1.23821	9.84546	7.17126e-23	7.27082e-22	0.747121	4.51884	6.21807e-06	4.02001e-05	1.49038	7.69813	1.38077e-14	3.23344e-13
Lats2	1.73616	9.79269	1.21034e-22	1.21411e-21	1.05213	5.20386	1.95194e-07	1.55537e-06	1.14473	3.33689	0.00084722	0.00483766
Mlst8	1.75642	9.78051	1.36526e-22	1.36679e-21	1.22244	5.92278	3.16554e-09	3.14678e-08	0.45778	2.03404	0.0419472	0.120007
Slc38a10	1.4052	9.73825	2.07095e-22	2.05693e-21	1.06138	5.90263	3.57757e-09	3.53147e-08	0.259571	1.23517	0.216766	0.390192
Prkcb	1.17083	9.73287	2.18343e-22	2.16155e-21	2.52674	18.1631	1.01205e-73	1.01899e-70	2.21009	12.2639	1.41505e-34	1.4996e-32
Zfr	1.32334	9.66803	4.12243e-22	4.0493e-21	1.47431	10.0211	1.23144e-23	4.22344e-22	1.77454	7.37208	1.6798e-13	3.5969e-12
Fbxl18	1.46704	9.64083	5.37514e-22	5.25705e-21	1.71217	7.8905	3.00987e-15	5.39785e-14	1.29322	4.45308	8.46472e-06	7.56621e-05
Mpp2	1.04035	9.64033	5.40115e-22	5.27791e-21	1.36674	8.46246	2.61795e-17	5.70365e-16	1.71934	8.09599	5.68027e-16	1.47369e-14
Pigq	1.54443	9.63441	5.72175e-22	5.58397e-21	0.55005	3.33041	0.00086717	0.00360792	0.971708	4.73467	2.19413e-06	2.16556e-05
Stxbp2	2.79478	9.58937	8.86212e-22	8.58774e-21	0.954343	3.34806	0.000813803	0.00341308	1.40544	3.32604	0.000880894	0.00500936
Phlpp1	1.29145	9.57149	1.05375e-21	1.01982e-20	0.954548	6.29205	3.13304e-10	3.4747e-09	0.0142419	0.0720582	0.942556	0.968501
Sh2d5	1.41693	9.56494	1.1227e-21	1.08239e-20	1.74188	7.99113	1.33705e-15	2.47013e-14	1.76712	7.35109	1.96602e-13	4.15991e-12
Zfp142	1.86523	9.52497	1.65092e-21	1.58658e-20	1.43785	7.01074	2.37054e-12	3.23791e-11	0.927465	3.91069	9.20341e-05	0.00067939
Mgrn1	1.05778	9.51505	1.8163e-21	1.74219e-20	1.05264	6.5439	5.99336e-11	7.12932e-10	0.801041	6.01397	1.81038e-09	2.70803e-08
Irgq	1.28236	9.50271	2.045e-21	1.95784e-20	1.52161	9.12194	7.37895e-20	1.88431e-18	1.19182	4.78789	1.68545e-06	1.69018e-05
Zswim8	1.14683	9.49329	2.23846e-21	2.13764e-20	1.80829	11.283	1.59235e-29	7.84818e-28	1.08122	5.66036	1.51058e-08	1.99681e-07
Tubb5	1.00707	9.47984	2.5468e-21	2.41834e-20	1.54767	11.0072	3.52957e-28	1.61012e-26	0.71806	5.8508	4.89214e-09	6.92823e-08
Flrt1	1.55774	9.45544	3.2168e-21	3.04307e-20	1.2144	6.16543	7.02915e-10	7.52338e-09	0.638201	2.96444	0.0030323	0.0143959
Arhgef25	1.03557	9.43837	3.78622e-21	3.56834e-20	1.57042	10.4511	1.44824e-25	5.67066e-24	2.28482	12.0056	3.32159e-33	3.14671e-31
Phospho1	2.25582	9.43586	3.87788e-21	3.65246e-20	1.40581	5.13048	2.89004e-07	2.25321e-06	2.33875	6.61824	3.63491e-11	6.40205e-10
Zfp592	1.76502	9.41974	4.52218e-21	4.24871e-20	0.798032	3.76455	0.000166849	0.000822631	0.0529517	0.266794	0.789628	0.877091
Gtpbp6	2.03527	9.41759	4.61548e-21	4.33098e-20	0.803423	3.3107	0.000930634	0.00384698	1.14111	3.38395	0.000714521	0.00418505
Pip4k2b	1.12932	9.39348	5.80518e-21	5.42044e-20	1.34106	8.35592	6.49246e-17	1.36187e-15	1.2287	6.19038	6.00195e-10	9.47656e-09
C030006K11Rik	3.02538	9.33779	9.83692e-21	9.10065e-20	0.635994	2.36416	0.0180711	0.0497035	0.529828	1.62432	0.104308	0.232792
Vrk3	1.72746	9.33516	1.00842e-20	9.31799e-20	0.980433	4.1208	3.77562e-05	0.000213311	1.13159	3.96405	7.36885e-05	0.00055611
Cmip	0.994027	9.31963	1.16748e-20	1.07614e-19	1.60616	12.0621	1.67431e-33	1.08761e-31	1.22967	8.10333	5.34764e-16	1.39317e-14
Rptor	1.17524	9.31251	1.24844e-20	1.15007e-19	1.70921	9.91127	3.71879e-23	1.25107e-21	0.727891	3.77349	0.000160978	0.0011246
Paxip1	1.78815	9.28263	1.65353e-20	1.51862e-19	0.803959	4.13942	3.48178e-05	0.000198059	1.27743	4.96327	6.93149e-07	7.29002e-06
Apba3	2.50934	9.17362	4.57395e-20	4.12065e-19	0.663652	2.59752	0.00938997	0.028818	1.03759	3.27273	0.00106515	0.00589628
Nol6	1.03284	9.15825	5.27453e-20	4.74896e-19	2.20339	12.5578	3.60002e-36	2.89977e-34	1.02334	6.59898	4.13982e-11	7.25049e-10
Foxo3	2.35952	9.09029	9.87715e-20	8.82463e-19	1.20592	4.24145	2.22084e-05	0.000130819	0.76179	1.82857	0.0674635	0.169984
Foxp4	1.25216	9.04295	1.52502e-19	1.35451e-18	1.94209	8.43524	3.30528e-17	7.10233e-16	2.08047	9.61561	6.87013e-22	2.91224e-20
Rnf166	1.80331	9.02292	1.83146e-19	1.62192e-18	0.506394	2.43389	0.0149376	0.0424097	1.05543	3.56653	0.000361745	0.00231033
Zfp628	1.87257	8.96477	3.10926e-19	2.72637e-18	1.75718	5.83651	5.3305e-09	5.17128e-08	1.52896	5.03108	4.87724e-07	5.28051e-06
Mnt	1.34373	8.93661	4.01282e-19	3.49964e-18	1.25873	6.53097	6.53443e-11	7.74028e-10	1.7973	7.75821	8.61397e-15	2.05568e-13
Hs3st4	1.56839	8.92766	4.35123e-19	3.78903e-18	1.21303	7.46834	8.12128e-14	1.26775e-12	1.68228	9.35555	8.31646e-21	3.17065e-19
Fam120a	1.10438	8.92392	4.5005e-19	3.91676e-18	0.582317	3.55916	0.000372038	0.00169279	0.459531	2.41457	0.0157536	0.0557046
Vapb	1.26894	8.92059	4.63815e-19	4.03191e-18	0.586708	3.28827	0.00100806	0.00411212	1.17695	5.11713	3.10216e-07	3.4421e-06
2020-03-09	1.64316	8.90039	5.56501e-19	4.82375e-18	1.59817	6.79565	1.07829e-11	1.37552e-10	1.95611	5.42575	5.77127e-08	7.13139e-07
Cacng2	1.5643	8.88709	6.27318e-19	5.43136e-18	0.941733	4.9182	8.73444e-07	6.3727e-06	1.05787	4.61125	4.00252e-06	3.8149e-05
Hrh3	1.27433	8.83942	9.62209e-19	8.23187e-18	1.7666	9.79372	1.19807e-22	3.87341e-21	1.71541	8.98066	2.69142e-19	9.29728e-18
Mfhas1	1.35131	8.83532	9.98117e-19	8.51979e-18	1.2521	5.86018	4.62354e-09	4.51652e-08	0.950909	3.75419	0.000173904	0.00120015
Sox4	1.59307	8.78675	1.53944e-18	1.3052e-17	0.800355	4.03523	5.45496e-05	0.000299078	0.402666	1.89581	0.0579855	0.152398
Rhobtb2	1.24871	8.72883	2.57324e-18	2.15497e-17	0.757863	4.40571	1.05436e-05	6.58207e-05	0.615898	3.44331	0.000574636	0.00343491
Slc45a4	1.58477	8.699	3.34817e-18	2.78713e-17	1.90993	7.68837	1.49019e-14	2.53081e-13	1.08532	3.60885	0.000307562	0.00199691
Lrp3	1.18665	8.67408	4.16893e-18	3.44569e-17	1.51737	7.81553	5.47317e-15	9.61967e-14	1.47326	6.95069	3.63498e-12	7.02557e-11
Stk35	1.92748	8.66581	4.48296e-18	3.70322e-17	0.666129	2.91959	0.00350491	0.0124102	0.808452	2.906	0.00366082	0.0168551
Wdr4	1.96355	8.6447	5.3945e-18	4.44165e-17	0.936093	3.81186	0.000137927	0.000693373	0.7929	2.83493	0.00458355	0.0203325
Calm3	0.904858	8.63307	5.97258e-18	4.90693e-17	1.48799	9.56684	1.10224e-21	3.30577e-20	1.69568	14.3708	7.89577e-47	1.93601e-44
Celf2	1.07721	8.61105	7.23919e-18	5.9122e-17	1.52242	8.98571	2.5706e-19	6.32377e-18	1.59176	11.4821	1.62329e-30	1.27668e-28
Itpka	0.909528	8.59054	8.65611e-18	7.04655e-17	1.96532	10.6734	1.35562e-26	5.53878e-25	2.22461	13.2891	2.67614e-40	4.29041e-38
Hdac6	1.55895	8.5869	8.93511e-18	7.26585e-17	1.27414	6.10899	1.00261e-09	1.04843e-08	0.444225	2.0786	0.0376545	0.110352
Tet3	1.48452	8.57511	9.8994e-18	8.0327e-17	0.703624	3.00932	0.00261832	0.00958146	0.300197	1.07485	0.282443	0.466203
Gm5088	3.21328	8.55676	1.16089e-17	9.33961e-17	1.66262	4.83406	1.33776e-06	9.49025e-06	1.86009	3.73871	0.00018497	0.00126673
Npdc1	0.931009	8.50758	1.77609e-17	1.41834e-16	1.61554	9.24722	2.30408e-20	6.19815e-19	1.99374	11.8484	2.1931e-32	2.0018e-30
Pde8b	1.29499	8.50732	1.78005e-17	1.42e-16	0.962712	5.70639	1.15395e-08	1.07014e-07	1.03788	4.98797	6.10161e-07	6.46068e-06
Zc3h4	1.48994	8.47415	2.36805e-17	1.87325e-16	1.21271	5.77866	7.52966e-09	7.13773e-08	0.479145	1.90511	0.0567661	0.15014
Mon1a	1.5876	8.45801	2.7197e-17	2.14469e-16	1.66623	7.00596	2.45299e-12	3.34404e-11	1.59788	5.4499	5.03974e-08	6.26461e-07
Fam98c	1.72736	8.41939	3.78456e-17	2.96893e-16	1.28339	4.99001	6.03767e-07	4.51257e-06	1.53736	5.1566	2.5148e-07	2.83567e-06
Trappc10	1.2229	8.40686	4.21127e-17	3.29342e-16	1.15645	6.49874	8.09966e-11	9.52234e-10	0.835239	4.39841	1.09045e-05	9.54034e-05
Kiss1r	3.84908	8.40417	4.30904e-17	3.36814e-16	1.26123	3.53668	0.000405192	0.00182421	2.32079	3.51027	0.000447653	0.00277674
Dennd1a	1.25874	8.40221	4.3816e-17	3.42308e-16	0.683044	3.84576	0.000120179	0.000614454	0.220008	1.182	0.237204	0.415906
Mark4	1.17465	8.39762	4.55609e-17	3.55389e-16	1.41418	6.74699	1.50939e-11	1.90308e-10	1.46552	6.70975	1.94964e-11	3.51807e-10
Ulk2	1.20861	8.39451	4.67839e-17	3.64365e-16	0.86395	5.53756	3.06709e-08	2.72253e-07	0.95499	3.76331	0.000167681	0.00116218
Vsig2	2.56958	8.38487	5.07837e-17	3.945e-16	1.63914	5.52411	3.31156e-08	2.92846e-07	2.34253	5.25131	1.51022e-07	1.76828e-06
Dnal1	1.15638	8.38014	5.28627e-17	4.10229e-16	1.3188	7.59205	3.14877e-14	5.14909e-13	1.66376	8.82146	1.1298e-18	3.66964e-17
Ppp1r3f	1.56221	8.37818	5.37506e-17	4.16691e-16	1.42484	6.52091	6.98816e-11	8.25693e-10	1.58515	5.52772	3.24427e-08	4.1289e-07
Atg7	1.50062	8.35637	6.46772e-17	4.98585e-16	0.782443	3.84781	0.00011918	0.000610007	0.206641	0.986741	0.323769	0.511075
Tbc1d5	1.52743	8.35514	6.53544e-17	5.03549e-16	1.34031	6.62399	3.49636e-11	4.25602e-10	0.607195	2.28494	0.0223163	0.0729392
Fam163b	1.5276	8.30785	9.74516e-17	7.45534e-16	0.4769	2.71664	0.0065949	0.0213019	1.70103	5.09782	3.43592e-07	3.80231e-06
Mypop	1.37485	8.29624	1.07462e-16	8.20457e-16	1.33654	6.53112	6.52814e-11	7.73933e-10	2.06272	6.3912	1.64593e-10	2.74066e-09
Ttc23	2.60454	8.28221	1.20913e-16	9.20828e-16	0.771559	2.69888	0.00695725	0.0223096	0.879132	2.12331	0.0337276	0.100852
Arhgap44	1.04647	8.27955	1.23646e-16	9.40216e-16	1.94687	10.8555	1.87749e-27	8.14311e-26	2.02292	8.96506	3.10121e-19	1.0654e-17
Ncor1	0.962096	8.273	1.30627e-16	9.92307e-16	0.991342	7.52282	5.36074e-14	8.55775e-13	1.15949	8.64774	5.25293e-18	1.60214e-16
Dzank1	1.23107	8.24413	1.66367e-16	1.25811e-15	1.3525	7.62566	2.42795e-14	4.01695e-13	1.09105	3.70857	0.000208432	0.00140813
Nr2c2	1.49282	8.22527	1.9475e-16	1.46835e-15	1.32155	6.91886	4.55294e-12	6.04315e-11	1.13674	3.53084	0.000414236	0.00260302
Pik3cd	1.68219	8.21647	2.09579e-16	1.577e-15	1.36105	5.72691	1.02277e-08	9.54762e-08	0.874561	3.20168	0.00136629	0.00731396
Pgls	1.74601	8.21187	2.17767e-16	1.63699e-15	0.755179	3.11286	0.00185285	0.00707989	0.187683	0.75833	0.448253	0.629245
Flywch1	0.889075	8.18438	2.737e-16	2.04625e-15	1.82846	11.927	8.55894e-33	5.26842e-31	1.58766	12.4656	1.14997e-35	1.38273e-33
Fam160a2	1.14646	8.15775	3.41337e-16	2.54062e-15	1.81473	8.91613	4.82874e-19	1.15562e-17	1.0204	5.63861	1.71431e-08	2.24476e-07
Evi5l	1.62247	8.15691	3.43701e-16	2.55569e-15	0.826371	3.1801	0.00147223	0.00577585	0.465329	1.77283	0.0762563	0.185957
Cpeb2	1.47451	8.15355	3.53393e-16	2.62438e-15	1.19039	6.31983	2.61846e-10	2.94102e-09	0.931967	3.10696	0.00189025	0.00959317
Bahd1	1.15646	8.11361	4.91385e-16	3.62354e-15	1.9768	10.5013	8.51987e-26	3.36404e-24	1.45891	5.73776	9.59351e-09	1.31687e-07
Ogdh	0.982914	8.11334	4.92471e-16	3.62978e-15	0.837446	5.19413	2.05677e-07	1.63244e-06	0.105897	0.606079	0.544462	0.70709
Scap	1.02463	8.09553	5.70145e-16	4.18596e-15	1.22965	6.94016	3.91649e-12	5.2478e-11	0.989418	5.23583	1.64245e-07	1.91237e-06
Mta1	1.26178	8.0916	5.88872e-16	4.32135e-15	0.804569	4.29536	1.74414e-05	0.000104797	0.425887	2.35299	0.0186229	0.0633859
1700001O22Rik	2.95081	8.08667	6.13178e-16	4.49753e-15	1.44089	4.06515	4.80017e-05	0.000265658	2.54091	4.12489	3.70907e-05	0.000295992
Atp2b2	0.8526	8.08606	6.16261e-16	4.51795e-15	1.87762	11.4965	1.374e-30	7.19996e-29	1.64702	6.52166	6.95329e-11	1.19932e-09
Ago2	1.31038	8.06767	7.16501e-16	5.22748e-15	1.58389	7.37247	1.6749e-13	2.56623e-12	0.449069	1.54047	0.123446	0.262221
Grik4	1.36033	8.04124	8.89303e-16	6.44777e-15	1.73301	8.2145	2.13058e-16	4.24791e-15	1.54476	6.2112	5.25829e-10	8.34453e-09
Kcnn1	1.70444	8.01159	1.13232e-15	8.16277e-15	1.26404	5.12729	2.93939e-07	2.28789e-06	1.91866	5.40467	6.49268e-08	7.9599e-07
Znhit2	1.39169	8.01109	1.13695e-15	8.18831e-15	0.831964	3.53162	0.000413017	0.00185588	1.82267	6.1731	6.69635e-10	1.04481e-08
Rxrb	1.10553	7.99834	1.26106e-15	9.07786e-15	1.35039	7.53189	5.00126e-14	8.01112e-13	1.48702	7.06461	1.61062e-12	3.19695e-11
Pcnt	1.49342	7.95392	1.80698e-15	1.28971e-14	1.31649	5.8326	5.45696e-09	5.27219e-08	1.17375	3.82605	0.000130214	0.000925185
Emc1	0.964889	7.94641	1.91989e-15	1.36772e-14	1.40679	8.60291	7.772e-18	1.75006e-16	0.313226	1.57754	0.114672	0.24908
Mex3d	2.01231	7.88413	3.16743e-15	2.23018e-14	0.820079	3.04759	0.00230684	0.0085979	1.17549	3.26032	0.00111286	0.00612246
Nnt	1.6366	7.86801	3.60338e-15	2.53006e-14	0.686257	3.19369	0.00140466	0.00553076	0.230325	0.786662	0.43148	0.615451
Diaph1	1.23272	7.81939	5.30799e-15	3.69603e-14	0.765973	3.88615	0.000101847	0.000528584	1.24896	5.43288	5.54511e-08	6.85871e-07
Slc17a7	0.744262	7.81352	5.56139e-15	3.86506e-14	2.03838	13.222	6.55067e-40	6.69118e-38	1.94848	13.7981	2.61527e-43	4.95514e-41
Setd1b	1.162	7.80671	5.87003e-15	4.07238e-14	1.07087	6.03914	1.5494e-09	1.58149e-08	0.671408	2.59904	0.00934849	0.0367948
Grm2	2.30987	7.78604	6.91411e-15	4.77699e-14	1.98548	7.03928	1.93232e-12	2.67039e-11	1.70319	3.86136	0.000112756	0.000816455
Wdr6	1.00292	7.77613	7.47743e-15	5.15912e-14	1.55054	9.19545	3.73445e-20	9.78454e-19	0.229619	1.35468	0.17552	0.336122
Sdcbp2	3.35158	7.77012	7.84092e-15	5.40498e-14	2.5777	5.65277	1.57884e-08	1.44609e-07	2.31713	3.42887	0.000606096	0.00359887
Pdgfa	1.46901	7.76755	8.00196e-15	5.50595e-14	0.532235	2.49054	0.012755	0.0372555	0.521626	1.95053	0.0511136	0.13883
Map2k2	1.12029	7.75997	8.49518e-15	5.83205e-14	0.478392	2.8345	0.00458974	0.0156386	0.620653	3.20694	0.00134155	0.00720312
Wdr18	1.14418	7.75884	8.57074e-15	5.87858e-14	1.49781	8.1259	4.44043e-16	8.53919e-15	0.669367	3.42471	0.000615446	0.00364747
Pdxp	0.87634	7.75197	9.04766e-15	6.20288e-14	1.3779	7.98879	1.36272e-15	2.51426e-14	1.72332	8.71237	2.97585e-18	9.32357e-17
Crb2	2.8496	7.69129	1.45661e-14	9.89201e-14	2.16343	5.2911	1.21584e-07	1.00108e-06	1.70605	3.13434	0.00172241	0.00887831
Saraf	0.893112	7.6684	1.74153e-14	1.17899e-13	0.91296	6.03608	1.57907e-09	1.6106e-08	0.586026	4.91094	9.06427e-07	9.37541e-06
Arhgap39	0.973285	7.65811	1.88682e-14	1.2762e-13	1.96635	9.42606	4.25781e-21	1.21494e-19	1.59636	7.64723	2.05348e-14	4.68591e-13
Fbxw4	1.49674	7.64764	2.04699e-14	1.38021e-13	0.94486	4.39347	1.11554e-05	6.92409e-05	1.40446	5.09447	3.4972e-07	3.86671e-06
Kif26b	3.64378	7.6312	2.32583e-14	1.56195e-13	1.38805	3.36549	0.000764075	0.00322274	0.734351	1.14285	0.253103	0.434309
Pde1b	1.13495	7.60129	2.93194e-14	1.95683e-13	1.20014	6.55713	5.48523e-11	6.56366e-10	1.04868	4.86283	1.15717e-06	1.1803e-05
Apbb1	0.841271	7.59628	3.04755e-14	2.0304e-13	1.10101	7.6407	2.16048e-14	3.60404e-13	1.37567	10.0918	6.0066e-24	2.79229e-22
Tecpr1	0.912934	7.58895	3.2251e-14	2.1468e-13	2.02608	10.9435	7.13906e-28	3.23576e-26	0.895867	3.91502	9.03983e-05	0.000668103
Sh3rf1	0.992269	7.52506	5.26966e-14	3.46655e-13	1.9665	11.3404	8.27638e-30	4.13702e-28	1.72548	7.3026	2.82251e-13	5.88259e-12
Nup214	1.34894	7.51245	5.80307e-14	3.80421e-13	1.14761	5.71148	1.11996e-08	1.04067e-07	0.424283	1.70127	0.0888927	0.207024
Mef2d	0.863126	7.48925	6.92657e-14	4.52111e-13	1.60584	9.49959	2.10727e-21	6.17548e-20	1.59272	7.17084	7.45396e-13	1.51811e-11
Rasal1	0.916042	7.48869	6.95626e-14	4.53657e-13	2.60796	13.041	7.15538e-39	7.00263e-37	1.74045	10.0145	1.31581e-23	6.0272e-22
Wdr34	1.53208	7.48039	7.41006e-14	4.82005e-13	0.735043	2.90432	0.00368057	0.0129509	0.527275	2.10426	0.0353553	0.104901
Mast1	0.917733	7.46029	8.63317e-14	5.59638e-13	1.64132	9.27613	1.75753e-20	4.7919e-19	1.21824	5.31743	1.05242e-07	1.25938e-06
Auts2	1.11774	7.45062	9.29014e-14	6.00937e-13	0.78578	4.11079	3.94302e-05	0.000221703	0.870673	4.14323	3.42446e-05	0.000274858
Ints1	1.10368	7.43459	1.04893e-13	6.76093e-13	2.05483	9.16676	4.87442e-20	1.27005e-18	0.615388	2.62028	0.00878568	0.0350334
Dtx3	1.01959	7.43455	1.04923e-13	6.76093e-13	0.843682	5.21697	1.8187e-07	1.45744e-06	0.883632	4.58973	4.43827e-06	4.18241e-05
Spata2	1.0395	7.42622	1.11748e-13	7.19153e-13	1.02118	5.92147	3.19081e-09	3.16521e-08	0.769673	3.75036	0.000176578	0.00121659
Pura	0.974222	7.39908	1.37132e-13	8.77286e-13	0.828926	5.29389	1.19741e-07	9.87055e-07	0.322219	1.97605	0.0481488	0.132738
Fam155a	0.870481	7.38453	1.52989e-13	9.76198e-13	1.33026	8.38311	5.1548e-17	1.08775e-15	1.5592	10.2462	1.23031e-24	6.154e-23
Taf4	1.83201	7.37631	1.62732e-13	1.03493e-12	0.921945	3.52523	0.000423116	0.00189582	0.874629	2.55664	0.0105689	0.0405659
Nbl1	1.01127	7.3609	1.82668e-13	1.16074e-12	0.488358	3.01145	0.0026	0.00952184	1.52251	7.6954	1.41053e-14	3.29695e-13
Proz	2.05766	7.33917	2.14923e-13	1.35941e-12	1.90341	6.07745	1.22111e-09	1.26657e-08	2.12421	4.39541	1.10564e-05	9.65505e-05
Jade2	1.10364	7.32116	2.45834e-13	1.54974e-12	1.1546	6.42749	1.29726e-10	1.49154e-09	1.18646	5.04411	4.55632e-07	4.9459e-06
Tmem259	1.02081	7.29027	3.09334e-13	1.93712e-12	0.85453	5.11615	3.11835e-07	2.4165e-06	0.560145	2.73544	0.00622977	0.026376
Ndor1	1.73452	7.28022	3.33267e-13	2.0844e-12	1.06561	4.16816	3.07072e-05	0.000176745	0.96192	3.19785	0.00138458	0.00739924
Plppr3	1.62452	7.27884	3.36694e-13	2.10409e-12	0.707787	3.06897	0.00214795	0.00806756	0.00361447	0.0145127	0.988421	0.993641
Camkk2	0.779774	7.26104	3.84136e-13	2.38676e-12	2.04434	13.6659	1.62395e-42	2.24423e-40	1.73094	11.1247	9.51263e-29	6.32741e-27
Strn4	0.787702	7.25646	3.97358e-13	2.46688e-12	1.5638	9.26053	2.0342e-20	5.50116e-19	1.60756	10.4238	1.93125e-25	1.05001e-23
Stpg1	2.03936	7.22396	5.04942e-13	3.10925e-12	1.3184	4.38272	1.17206e-05	7.23985e-05	2.45663	4.55971	5.12234e-06	4.74832e-05
Smad7	1.47061	7.21633	5.34094e-13	3.28207e-12	0.978708	4.10807	3.98987e-05	0.000224078	0.71592	2.37943	0.0173392	0.0600131
Gprin1	0.746789	7.20961	5.61137e-13	3.44126e-12	2.67039	16.0299	7.8999e-58	3.09325e-55	2.98174	15.9707	2.04351e-57	1.02216e-54
Man2c1	1.27564	7.19557	6.21997e-13	3.80216e-12	1.57015	6.88113	5.93809e-12	7.78635e-11	0.619926	2.35771	0.0183882	0.0628818
Kcnk3	1.58659	7.17727	7.11154e-13	4.34364e-12	1.06247	4.39919	1.08656e-05	6.76511e-05	0.870254	2.9444	0.00323582	0.0152234
Tmtc1	1.16363	7.17652	7.15095e-13	4.36595e-12	0.857345	3.9939	6.49956e-05	0.000350757	1.36083	5.11166	3.19337e-07	3.54017e-06
Tuba1a	0.670549	7.17634	7.16032e-13	4.36814e-12	1.08786	8.05548	7.91659e-16	1.49788e-14	0.0825529	0.819009	0.412781	0.599724
Espn	3.12659	7.1657	7.73888e-13	4.71348e-12	2.0044	4.84792	1.24763e-06	8.90909e-06	2.50328	3.5718	0.000354542	0.0022678
Elk1	1.28021	7.11628	1.10876e-12	6.69106e-12	0.890212	4.39804	1.09235e-05	6.79814e-05	1.93801	5.88244	4.04273e-09	5.79088e-08
Cpxm1	2.42763	7.0767	1.47631e-12	8.83509e-12	1.4588	4.69025	2.72865e-06	1.86895e-05	1.16557	2.81934	0.00481222	0.0211741
Myo18a	0.9152	7.06693	1.58397e-12	9.46435e-12	0.732252	4.47014	7.81676e-06	4.97899e-05	0.276592	1.05023	0.293614	0.478578
Gpaa1	1.27606	7.05794	1.68993e-12	1.00816e-11	1.39518	5.8171	5.98773e-09	5.7417e-08	0.440005	1.9379	0.052635	0.141701
Zfp574	1.40406	7.05157	1.76915e-12	1.05334e-11	1.20511	5.45297	4.95346e-08	4.28894e-07	1.51757	5.12519	2.97244e-07	3.30992e-06
Zbtb17	1.24756	7.04392	1.869e-12	1.11104e-11	1.75987	7.26634	3.69353e-13	5.49779e-12	1.7701	6.08018	1.20049e-09	1.83298e-08
Slc35e4	1.47094	7.02146	2.19569e-12	1.30319e-11	1.20809	5.32658	1.0008e-07	8.34753e-07	0.66485	2.27524	0.0228916	0.0743724
Ccdc120	2.131	6.9898	2.75287e-12	1.62496e-11	1.80915	5.37064	7.84575e-08	6.61841e-07	2.08369	3.55777	0.00037401	0.00237291
Fam189a1	0.857165	6.98271	2.89532e-12	1.70438e-11	1.72055	9.89292	4.46791e-23	1.48537e-21	1.91564	9.68032	3.65558e-22	1.57631e-20
Rnf31	1.57021	6.93834	3.96745e-12	2.31121e-11	0.808055	3.18524	0.00144636	0.00568065	0.642306	1.61455	0.106409	0.235844
Ubxn6	0.960606	6.93371	4.09948e-12	2.38536e-11	1.07158	5.97932	2.24072e-09	2.25862e-08	1.17617	6.16418	7.08498e-10	1.10059e-08
Gpr162	0.844832	6.919	4.5484e-12	2.6415e-11	1.23455	7.6209	2.51923e-14	4.1582e-13	1.37117	8.69898	3.3489e-18	1.03916e-16
Spock2	0.670051	6.90712	4.94582e-12	2.8657e-11	1.14483	7.33654	2.19187e-13	3.32937e-12	0.781859	6.46797	9.93311e-11	1.68311e-09
Rai1	0.97539	6.87496	6.2006e-12	3.5722e-11	1.89415	10.6972	1.04881e-26	4.29769e-25	1.50314	6.93488	4.06567e-12	7.82172e-11
Sema7a	0.805367	6.87323	6.27655e-12	3.6132e-11	1.91017	10.1817	2.39398e-24	8.50013e-23	1.25761	6.53693	6.2793e-11	1.09059e-09
Zfp13	1.58795	6.86524	6.63789e-12	3.8125e-11	1.16114	4.58009	4.64787e-06	3.073e-05	1.22361	3.79428	0.000148075	0.00104177
Znfx1	1.24105	6.85449	7.15678e-12	4.09962e-11	1.14885	5.20961	1.89239e-07	1.51134e-06	0.1752	0.658865	0.509982	0.679886
Cyfip2	0.741612	6.85024	7.37277e-12	4.21695e-11	2.26246	15.4306	1.01958e-53	2.99417e-51	1.86142	8.39874	4.51285e-17	1.28257e-15
Ano8	1.05509	6.84912	7.43055e-12	4.2484e-11	1.57301	8.05179	8.15949e-16	1.53971e-14	0.68697	3.18587	0.00144318	0.00763729
Gak	0.856629	6.83894	7.97797e-12	4.55622e-11	1.35604	8.17054	3.07004e-16	5.97274e-15	0.330511	2.00044	0.045453	0.127499
Umodl1	2.82668	6.82973	8.50733e-12	4.84937e-11	2.30552	4.82283	1.41534e-06	1.00104e-05	3.00532	3.85476	0.000115841	0.000833964
Atp5d	0.743841	6.8047	1.01258e-11	5.74379e-11	0.70046	4.43234	9.3215e-06	5.87901e-05	0.729713	5.1471	2.64546e-07	2.96961e-06
Asic2	1.00809	6.79826	1.05892e-11	6.00216e-11	1.24369	7.06611	1.59333e-12	2.22152e-11	1.41557	6.55724	5.48125e-11	9.54638e-10
Pisd-ps1	1.41085	6.79639	1.07271e-11	6.07576e-11	0.544292	2.54826	0.0108262	0.032421	0.339768	1.16923	0.242311	0.422432
Brpf3	1.36846	6.77695	1.22738e-11	6.92586e-11	1.0289	4.80702	1.53194e-06	1.08025e-05	1.4783	4.59107	4.40986e-06	4.16191e-05
Emx1	1.94698	6.77638	1.23223e-11	6.95063e-11	1.276	4.09777	4.17141e-05	0.000233426	1.93069	3.69083	0.00022352	0.00149792
Clec2l	1.33233	6.74676	1.51182e-11	8.48336e-11	0.530767	2.44269	0.0145783	0.0416742	1.51562	4.98884	6.07424e-07	6.44261e-06
Gabrd	1.62124	6.73044	1.69149e-11	9.46698e-11	2.03727	6.90252	5.10892e-12	6.74933e-11	0.879225	2.76592	0.00567623	0.0243253
Atp1a3	0.662609	6.72879	1.71084e-11	9.57174e-11	2.18043	13.6199	3.05052e-42	4.05662e-40	1.75444	10.2449	1.24703e-24	6.2128e-23
Kcng2	1.36777	6.72722	1.72929e-11	9.67137e-11	2.14269	7.90306	2.72135e-15	4.89288e-14	1.78618	5.39118	6.99965e-08	8.55627e-07
Srrm2	0.838267	6.71546	1.87474e-11	1.04616e-10	1.51377	9.86726	5.77207e-23	1.90546e-21	0.181007	1.02538	0.305184	0.491541
Gtpbp3	1.51784	6.71222	1.91692e-11	1.06891e-10	1.5147	5.83696	5.31608e-09	5.16084e-08	1.51505	4.37658	1.20556e-05	0.000104113
Hk1	0.667518	6.70949	1.9531e-11	1.08868e-10	1.55456	9.76065	1.6609e-22	5.32093e-21	0.657861	4.2713	1.94337e-05	0.00016212
Plppr2	0.677863	6.6772	2.43554e-11	1.34816e-10	2.08708	13.3161	1.86489e-40	1.99147e-38	1.72869	10.7642	5.08197e-27	3.08496e-25
Lrrc4b	0.703949	6.67566	2.46124e-11	1.36138e-10	0.96119	6.16178	7.19321e-10	7.68147e-09	0.749052	5.85828	4.67682e-09	6.63832e-08
Gramd1a	0.9427	6.67417	2.4864e-11	1.3748e-10	1.49829	8.16485	3.2183e-16	6.24006e-15	1.10565	4.89714	9.7241e-07	1.0033e-05
Grk6	1.06539	6.67195	2.52428e-11	1.39472e-10	0.876959	4.27382	1.92156e-05	0.000114337	1.36674	5.72593	1.02866e-08	1.40101e-07
Dalrd3	1.11332	6.65877	2.76132e-11	1.5218e-10	1.22901	5.97212	2.34188e-09	2.35625e-08	1.17226	4.40843	1.04124e-05	9.16304e-05
Slc39a3	0.900053	6.64439	3.04474e-11	1.67069e-10	1.0935	6.17678	6.54211e-10	7.01275e-09	1.12199	5.84993	4.91789e-09	6.95681e-08
Adam11	0.721681	6.63282	3.29339e-11	1.80124e-10	1.71725	10.8107	3.0635e-27	1.30462e-25	1.45274	8.01659	1.08718e-15	2.73544e-14
Apc2	0.845865	6.62162	3.5528e-11	1.93961e-10	1.09548	6.3017	2.94405e-10	3.28057e-09	0.106475	0.480707	0.630725	0.773712
Bcl11b	0.712055	6.61927	3.60973e-11	1.96856e-10	2.64363	17.5063	1.28284e-68	1.00461e-65	1.7774	10.881	1.41984e-27	8.87756e-26
Plekhh3	2.06267	6.61864	3.62521e-11	1.97628e-10	1.11311	3.56325	0.000366288	0.00166932	0.445176	1.19703	0.231296	0.408756
Ttc9b	1.06515	6.61805	3.63959e-11	1.98269e-10	0.901402	4.00428	6.22065e-05	0.000337255	2.37009	7.03626	1.9747e-12	3.90104e-11
Scrt2	1.56009	6.60624	3.94209e-11	2.13823e-10	1.06244	4.10421	4.05691e-05	0.000227561	1.45633	4.15441	3.26129e-05	0.000262098
Zfp526	1.9445	6.54934	5.77908e-11	3.10346e-10	1.23516	3.55403	0.00037938	0.00172175	1.10421	2.36169	0.0181919	0.062343
Gdf1	0.810176	6.53684	6.28334e-11	3.3635e-10	1.31317	7.69217	1.44657e-14	2.4597e-13	1.27489	6.8093	9.80756e-12	1.8305e-10
Adam15	0.907574	6.50796	7.61766e-11	4.05908e-10	0.612351	3.86636	0.000110474	0.000568543	0.00242409	0.0112533	0.991021	0.99508
Kdm4b	0.936395	6.50358	7.84308e-11	4.17185e-10	2.11011	10.2259	1.51779e-24	5.44396e-23	1.4378	7.43111	1.07694e-13	2.33399e-12
Ppp2r3d	1.90037	6.48816	8.68905e-11	4.59756e-10	0.937177	3.13166	0.00173818	0.00667796	1.28888	3.12822	0.00175866	0.00903533
Josd1	0.942053	6.47932	9.21373e-11	4.85648e-10	1.11057	5.61315	1.98676e-08	1.79522e-07	1.3274	5.36948	7.89623e-08	9.5588e-07
Clptm1	0.803039	6.47872	9.25034e-11	4.87069e-10	0.944591	5.73105	9.98117e-09	9.33607e-08	0.477638	2.9115	0.00359697	0.0166101
Sarm1	1.18974	6.47099	9.73628e-11	5.11942e-10	1.39069	6.40365	1.51703e-10	1.7329e-09	1.07794	4.49979	6.80219e-06	6.16834e-05
Ubn1	0.88247	6.46911	9.85841e-11	5.18003e-10	1.54604	8.5221	1.56681e-17	3.47261e-16	1.03569	4.97151	6.64341e-07	7.0047e-06
Add1	0.688302	6.46013	1.04616e-10	5.47417e-10	0.737478	5.06502	4.08362e-07	3.10981e-06	0.522256	3.43505	0.00059244	0.00352616
Spred3	1.14809	6.45666	1.0704e-10	5.59709e-10	0.527549	2.58707	0.00967956	0.0295715	1.27804	4.45604	8.34892e-06	7.46824e-05
Rab40c	1.21583	6.43485	1.23593e-10	6.41163e-10	0.907173	3.94158	8.09455e-05	0.000429111	1.29078	4.81601	1.46458e-06	1.47817e-05
Cactin	1.20382	6.4296	1.27939e-10	6.62575e-10	0.820132	3.6592	0.000253	0.00119915	0.623935	2.63867	0.00832327	0.0334585
Cdk14	0.823231	6.42383	1.32891e-10	6.8704e-10	0.932215	6.29549	3.06436e-10	3.40925e-09	1.12466	7.31608	2.55315e-13	5.34793e-12
Nanos1	1.31865	6.42373	1.32972e-10	6.87228e-10	0.707893	3.13533	0.0017166	0.00660766	1.36248	3.65411	0.00025808	0.00170485
Rhbdl3	1.3178	6.39479	1.60769e-10	8.25805e-10	0.660978	2.86672	0.00414748	0.0143467	1.6905	4.64019	3.48093e-06	3.35097e-05
Hcfc1	0.861253	6.38724	1.68905e-10	8.66124e-10	1.56943	9.20087	3.55059e-20	9.33753e-19	0.808127	2.6053	0.00917943	0.036211
Frs3	1.61243	6.3851	1.71288e-10	8.76858e-10	0.823922	3.275	0.00105664	0.00428491	0.755588	2.34478	0.0190382	0.0644136
Mon1b	1.09331	6.36668	1.93158e-10	9.85478e-10	0.86862	4.38677	1.15045e-05	7.12512e-05	0.723174	3.28158	0.00103228	0.00573605
Tsen34	0.999531	6.36344	1.97289e-10	1.00554e-09	0.642173	3.58553	0.00033639	0.00154203	0.25855	1.31594	0.188195	0.352249
Pold1	2.24611	6.35297	2.11192e-10	1.07206e-09	1.69896	4.55633	5.20559e-06	3.41929e-05	0.286033	0.737976	0.460529	0.639595
Ablim3	1.48397	6.33765	2.33295e-10	1.18148e-09	0.788156	3.14939	0.00163609	0.00632737	1.41625	4.16714	3.0845e-05	0.000248529
Foxj1	2.70227	6.32621	2.51255e-10	1.26819e-09	1.40095	3.42992	0.000603769	0.00261065	1.03731	2.12407	0.033664	0.100758
Fmnl1	0.736628	6.30841	2.81919e-10	1.41964e-09	1.47256	8.72993	2.5482e-18	5.89809e-17	2.09189	10.6596	1.5734e-26	9.19411e-25
Cabp1	0.926627	6.29547	3.06471e-10	1.53969e-09	1.44902	7.32466	2.3951e-13	3.61858e-12	2.23681	8.5893	8.75023e-18	2.60419e-16
2900092D14Rik	1.3493	6.29048	3.16479e-10	1.58838e-09	1.03043	4.99382	5.91968e-07	4.43143e-06	0.645397	2.28998	0.0220226	0.0722247
Rab6b	0.713294	6.27107	3.58584e-10	1.79138e-09	1.02406	6.80916	9.81673e-12	1.25569e-10	1.09528	9.09662	9.31826e-20	3.31036e-18
Inf2	0.810771	6.25835	3.89084e-10	1.93862e-09	1.29433	7.11799	1.09509e-12	1.56555e-11	1.13705	6.61424	3.73471e-11	6.56857e-10
Hdac11	0.753846	6.23505	4.51645e-10	2.23633e-09	0.896119	5.67526	1.38476e-08	1.27329e-07	0.540983	3.59934	0.000319031	0.00206495
Dsp	6.47449	6.22968	4.67376e-10	2.31271e-09	1.60472	2.85558	0.00429578	0.0148306	1.57076	2.29973	0.0214634	0.0708367
Clec16a	0.831594	6.22159	4.9214e-10	2.4281e-09	1.53291	8.8111	1.23921e-18	2.89683e-17	0.586711	3.37218	0.000745763	0.00434161
Fbrs	1.13	6.20911	5.32846e-10	2.62293e-09	0.934638	4.07952	4.51284e-05	0.000250939	0.528368	2.23482	0.0254294	0.0806889
9130221H12Rik	1.97749	6.20432	5.49354e-10	2.70155e-09	1.35915	4.01695	5.89573e-05	0.000320873	1.79049	3.46682	0.000526651	0.00318638
Xpo6	1.11449	6.20038	5.63261e-10	2.76635e-09	1.81468	9.52555	1.64175e-21	4.8618e-20	1.5113	6.38965	1.66271e-10	2.76492e-09
Vsig10l	3.18795	6.19904	5.68076e-10	2.78818e-09	1.21899	2.73183	0.00629829	0.0205273	0.624099	1.16585	0.243674	0.423861
Camkv	0.633018	6.1953	5.8173e-10	2.85057e-09	2.30989	13.9576	2.82869e-44	4.38167e-42	2.09955	11.187	4.72193e-29	3.22665e-27
Ogfr	1.0978	6.16858	6.89052e-10	3.35688e-09	0.565399	2.79572	0.00517843	0.0173508	0.366408	1.64441	0.100092	0.225698
Cyth1	1.22218	6.11766	9.49622e-10	4.57617e-09	0.960775	4.09702	4.18499e-05	0.000234094	0.861482	2.51553	0.0118852	0.0446321
Mark1	1.05182	6.10785	1.00985e-09	4.8602e-09	0.709838	3.57345	0.000352307	0.00161133	0.826651	3.45212	0.0005562	0.00334104
Prickle2	0.801036	6.10513	1.0272e-09	4.9374e-09	2.22113	13.5213	1.17124e-41	1.42326e-39	1.83516	6.78994	1.12182e-11	2.0752e-10
Foxk1	0.833288	6.1024	1.04486e-09	5.0191e-09	1.28768	6.89104	5.53853e-12	7.29636e-11	1.00236	4.8776	1.07383e-06	1.10158e-05
Tmem198	0.865229	6.0997	1.06265e-09	5.09807e-09	2.08167	9.14508	5.95865e-20	1.53552e-18	2.30204	8.80101	1.35595e-18	4.37014e-17
Pcnx3	0.98269	6.08732	1.14815e-09	5.49433e-09	1.25858	6.83376	8.27167e-12	1.0697e-10	0.479022	2.31094	0.0208364	0.0690773
Usp21	1.00455	6.07429	1.24535e-09	5.9463e-09	1.00277	4.86501	1.14451e-06	8.21856e-06	1.25292	4.42897	9.46851e-06	8.36184e-05
Mir6240	1.78914	6.07262	1.25843e-09	6.00685e-09	1.83928	6.67567	2.46111e-11	3.03251e-10	0.107252	0.102547	0.918322	0.953314
Mfsd12	1.66328	6.0615	1.34859e-09	6.423e-09	0.838874	2.91318	0.00357765	0.0126361	1.34772	3.30978	0.000933689	0.00525699
Snapc4	1.519	6.05394	1.41341e-09	6.71904e-09	1.18506	4.41408	1.0144e-05	6.34666e-05	0.77406	2.25295	0.0242625	0.0779486
Clasrp	1.48416	6.0433	1.50993e-09	7.16883e-09	0.738511	2.84376	0.00445851	0.0152727	0.405447	1.31686	0.187887	0.35208
Shf	1.08802	6.01493	1.79969e-09	8.50184e-09	1.25348	5.77729	7.59124e-09	7.19127e-08	1.72531	5.8351	5.37574e-09	7.57023e-08
Atmin	1.02189	5.99873	1.98869e-09	9.36249e-09	1.08578	5.48692	4.09002e-08	3.57427e-07	1.51965	6.26667	3.68859e-10	5.95941e-09
Fosl2	1.11651	5.99521	2.03217e-09	9.56127e-09	1.60659	7.2974	2.93382e-13	4.40417e-12	1.69587	5.61147	2.00616e-08	2.61324e-07
Top3b	1.29231	5.93237	2.98589e-09	1.39142e-08	1.25471	5.09646	3.46069e-07	2.66132e-06	0.491625	1.86055	0.0628081	0.161045
Mzf1	1.6152	5.91853	3.24825e-09	1.50949e-08	1.10219	3.54536	0.000392074	0.00177175	1.52614	3.27761	0.0010469	0.00580811
Fam171a2	0.702669	5.89985	3.6383e-09	1.68402e-08	1.98934	10.0446	9.70627e-24	3.37826e-22	1.49641	6.38153	1.75328e-10	2.90394e-09
Rbfox3	0.63456	5.89356	3.77966e-09	1.74785e-08	1.72928	11.4387	2.67787e-30	1.37764e-28	2.45417	12.3397	5.53375e-35	5.96548e-33
Mir1900	5.20593	5.87821	4.14716e-09	1.91311e-08	1.80513	2.91061	0.00360719	0.0127308	3.08651	2.78935	0.00528143	0.0228054
Irs2	1.15888	5.87582	4.20756e-09	1.9392e-08	2.07601	7.12062	1.07445e-12	1.5376e-11	0.91354	2.71797	0.00656831	0.0275996
Adcy2	0.657602	5.86724	4.43106e-09	2.03662e-08	0.725714	4.5027	6.70967e-06	4.31673e-05	0.481803	2.85361	0.00432254	0.0193601
Dcaf5	0.880678	5.85494	4.7717e-09	2.18564e-08	0.910033	5.293	1.20323e-07	9.91276e-07	0.828395	4.17892	2.92901e-05	0.00023707
Fgd1	1.55416	5.85	4.91586e-09	2.2485e-08	0.712552	2.44959	0.0143019	0.0409754	1.13864	2.58726	0.00967435	0.0378173
Dnah1	1.70624	5.83682	5.32056e-09	2.42554e-08	1.97171	5.58824	2.29382e-08	2.06209e-07	0.88708	2.16241	0.030587	0.0934269
Pgbd5	0.661031	5.83488	5.38285e-09	2.45246e-08	1.40501	8.20491	2.30764e-16	4.56861e-15	1.23342	7.71838	1.17814e-14	2.7745e-13
Arhgap27	1.45299	5.82911	5.57225e-09	2.53646e-08	0.997481	3.55352	0.000380112	0.00172451	1.26917	3.37415	0.000740437	0.00432066
Prr7	0.932196	5.82688	5.64721e-09	2.56903e-08	2.04402	9.03617	1.62258e-19	4.04097e-18	2.06346	7.9989	1.25534e-15	3.13334e-14
Add2	0.676889	5.82665	5.65498e-09	2.57102e-08	2.26626	13.9988	1.58543e-44	2.48313e-42	1.76517	6.88177	5.91128e-12	1.12171e-10
Cpt1c	0.725834	5.80858	6.30037e-09	2.84902e-08	2.14359	12.7113	5.12062e-37	4.36117e-35	1.73851	6.87276	6.29719e-12	1.18952e-10
Vamp2	0.679982	5.79333	6.90057e-09	3.11019e-08	1.13208	7.83734	4.60195e-15	8.12896e-14	1.51174	15.3397	4.15348e-53	1.44276e-50
Nr4a2	1.06343	5.76493	8.16907e-09	3.64606e-08	1.10005	5.82554	5.69279e-09	5.48126e-08	1.27213	5.84699	5.00554e-09	7.06481e-08
Engase	1.72019	5.75537	8.64543e-09	3.85411e-08	0.844033	2.67011	0.00758266	0.0239868	0.106392	0.26295	0.792589	0.879025
Mms19	1.22903	5.74768	9.04756e-09	4.02271e-08	1.05747	4.293	1.76275e-05	0.000105645	0.13855	0.555834	0.578325	0.732546
Crebbp	0.84365	5.74383	9.25595e-09	4.10932e-08	1.36607	8.1825	2.78005e-16	5.46548e-15	0.908727	3.91359	9.09334e-05	0.000671661
Sap30bp	1.13884	5.74157	9.38015e-09	4.15591e-08	1.10628	5.03152	4.86607e-07	3.67786e-06	1.31891	4.5259	6.01384e-06	5.51792e-05
Ep400	0.84566	5.71707	1.08379e-08	4.78076e-08	1.00578	5.70279	1.17864e-08	1.09016e-07	0.661107	2.76349	0.00571873	0.0244823
Rnf208	0.752514	5.71255	1.11292e-08	4.90355e-08	1.10923	6.48187	9.05953e-11	1.05802e-09	1.91825	8.93786	3.9679e-19	1.34104e-17
Mib2	0.833162	5.69996	1.19838e-08	5.27087e-08	1.35643	7.33498	2.21757e-13	3.36479e-12	0.644329	3.41089	0.000647522	0.00381766
Zfp697	1.09615	5.69304	1.24794e-08	5.4745e-08	1.47568	5.88142	4.0676e-09	3.99004e-08	1.41439	4.58875	4.45904e-06	4.19881e-05
Slc30a2	1.70336	5.66368	1.48157e-08	6.46748e-08	2.31422	6.09932	1.06519e-09	1.11057e-08	2.11148	4.06605	4.78174e-05	0.00037419
Bcl2l1	0.80874	5.66295	1.48792e-08	6.48959e-08	0.593454	3.33897	0.000840885	0.00351516	1.05872	5.49972	3.80397e-08	4.79522e-07
Cnksr2	0.871835	5.65611	1.54844e-08	6.74576e-08	2.92533	15.3286	4.9224e-53	1.36051e-50	1.93142	3.20579	0.00134694	0.00722275
Slc9a5	1.86687	5.65347	1.57245e-08	6.84641e-08	1.5359	4.30093	1.70086e-05	0.000102284	1.61758	3.17073	0.00152056	0.00797594
Exoc3l	2.43557	5.64271	1.67391e-08	7.27348e-08	1.54508	3.54287	0.000395801	0.00178535	2.48806	3.13324	0.00172886	0.00890051
Ccdc97	0.926624	5.60788	2.04818e-08	8.85145e-08	0.540805	2.88416	0.00392461	0.0136771	1.25637	5.37336	7.72841e-08	9.38712e-07
Cdan1	1.63994	5.60113	2.12953e-08	9.19513e-08	0.767375	2.59738	0.00939369	0.0288231	0.700952	1.80009	0.0718456	0.177731
Numbl	0.646278	5.58627	2.31996e-08	9.98317e-08	1.92886	11.461	2.07023e-30	1.06893e-28	2.25475	10.7424	6.43791e-27	3.87048e-25
Trerf1	1.08804	5.58531	2.33278e-08	1.00355e-07	1.53206	6.56783	5.10538e-11	6.12472e-10	0.921488	2.87824	0.00399903	0.0181676
Ptov1	0.638681	5.56469	2.62623e-08	1.12371e-07	1.18065	7.19762	6.12743e-13	8.93198e-12	0.631596	4.37032	1.24066e-05	0.000106923
Slc12a6	0.880072	5.56141	2.67596e-08	1.14273e-07	0.840628	4.74968	2.0374e-06	1.41753e-05	0.956082	3.42295	0.000619455	0.00366775
Zfp444	1.19078	5.5562	2.75712e-08	1.17606e-07	1.09982	4.78654	1.69683e-06	1.19057e-05	0.854593	2.69812	0.00697333	0.0290386
Glyctk	1.70986	5.55328	2.8036e-08	1.19487e-07	1.7388	5.00553	5.57096e-07	4.17703e-06	2.08762	3.55985	0.00037106	0.00235779
Nckap5l	1.18175	5.51148	3.55826e-08	1.50631e-07	0.757614	3.01676	0.00255494	0.00938365	0.963751	3.14024	0.00168809	0.00872019
Neurog2	2.28409	5.49518	3.90302e-08	1.64488e-07	1.91005	4.30415	1.67631e-05	0.00010098	1.88432	3.06573	0.00217142	0.0107795
Acot8	1.47119	5.48918	4.03806e-08	1.70085e-07	0.887012	3.16088	0.00157291	0.0061231	0.270691	0.744926	0.456317	0.636076
Gpc1	0.676678	5.46279	4.68715e-08	1.95788e-07	1.18512	7.51189	5.82789e-14	9.25111e-13	1.30811	8.11451	4.87739e-16	1.28134e-14
Rpap1	1.3153	5.46134	4.72552e-08	1.97282e-07	1.06151	3.93803	8.21542e-05	0.000434865	0.613978	1.89231	0.0584502	0.153265
Upf1	0.807912	5.45581	4.87513e-08	2.03191e-07	1.0862	5.68406	1.31531e-08	1.2126e-07	0.289727	1.3533	0.175959	0.336757
Abcb8	0.901287	5.44772	5.10209e-08	2.12241e-07	1.11214	5.78222	7.37194e-09	7.00707e-08	0.0886772	0.431294	0.666255	0.798038
Kif24	1.57177	5.44762	5.10491e-08	2.123e-07	1.35226	4.33051	1.48766e-05	9.0505e-05	0.414509	1.18487	0.236069	0.414321
Atp13a1	0.964789	5.44136	5.2876e-08	2.19475e-07	1.28571	5.94828	2.70973e-09	2.70896e-08	0.0404426	0.184155	0.853892	0.915926
Zdhhc8	0.797311	5.43508	5.47724e-08	2.26972e-07	0.986203	5.38087	7.41254e-08	6.27928e-07	0.764195	3.85638	0.000115079	0.00082991
N4bp1	0.917721	5.42881	5.67308e-08	2.34766e-07	0.981268	5.08937	3.59253e-07	2.75668e-06	0.974356	4.21306	2.51935e-05	0.000205777
Diras2	0.67573	5.41904	5.99195e-08	2.4742e-07	1.38066	8.43011	3.45343e-17	7.39812e-16	1.73146	8.03442	9.40244e-16	2.37052e-14
Smim10l2a	1.26551	5.40361	6.53113e-08	2.6851e-07	0.81236	2.97806	0.00290084	0.0105062	1.3625	3.65446	0.000257726	0.00170473
Snd1	0.613173	5.36881	7.92583e-08	3.23474e-07	2.12894	11.8898	1.33713e-32	8.12424e-31	1.37096	6.41174	1.43868e-10	2.41162e-09
Pck2	0.998186	5.3635	8.16252e-08	3.32954e-07	1.64151	7.1112	1.15039e-12	1.63466e-11	0.806008	3.27362	0.00106179	0.00588029
Gtpbp1	0.844107	5.36223	8.22023e-08	3.35218e-07	1.04633	5.15202	2.57693e-07	2.01915e-06	0.971988	4.48542	7.27691e-06	6.5655e-05
Rhbdd3	1.38731	5.34299	9.14245e-08	3.71223e-07	0.812222	2.86993	0.00410566	0.014216	1.22555	2.92343	0.00346193	0.0161018
Ipo4	0.804288	5.32877	9.88813e-08	4.00319e-07	1.41412	6.81045	9.72958e-12	1.24907e-10	0.852902	3.7221	0.000197574	0.00134203
Wwp2	0.990363	5.32056	1.03448e-07	4.18357e-07	1.14902	5.309	1.10231e-07	9.13475e-07	0.305502	1.39775	0.162187	0.318808
Pcid2	1.21132	5.31642	1.0583e-07	4.2765e-07	1.17198	4.24599	2.17633e-05	0.000128573	1.57291	2.97941	0.00288803	0.0138106
Dgkd	0.816904	5.26837	1.37644e-07	5.51049e-07	1.67243	8.16643	3.17638e-16	6.16725e-15	1.18675	5.7344	9.78609e-09	1.33973e-07
Plcxd1	1.67583	5.26273	1.41931e-07	5.67609e-07	1.31742	3.66608	0.000246301	0.00117055	1.64359	3.17816	0.00148214	0.00781069
Brip1	1.61835	5.2201	1.78831e-07	7.09178e-07	1.89045	5.10299	3.34336e-07	2.57671e-06	1.97575	3.95443	7.6718e-05	0.000576537
Ube2ql1	0.568152	5.20253	1.96596e-07	7.76777e-07	1.7304	11.2987	1.33118e-29	6.60715e-28	2.46268	13.521	1.17513e-41	2.04097e-39
Nmt1	0.556545	5.20152	1.97663e-07	7.80785e-07	1.74446	10.8253	2.61299e-27	1.12295e-25	1.5804	10.3308	5.11391e-25	2.66456e-23
Wdr44	1.14615	5.19172	2.08364e-07	8.20576e-07	2.06189	8.33467	7.77166e-17	1.62536e-15	1.69228	3.7275	0.000193391	0.00131718
Irf2bp2	0.863406	5.18927	2.1112e-07	8.30686e-07	0.48692	2.61632	0.00888836	0.0275122	0.182335	0.820979	0.411658	0.598803
Tnxb	1.30419	5.18776	2.12837e-07	8.36789e-07	2.41799	6.68373	2.32931e-11	2.88017e-10	1.14997	3.0797	0.00207209	0.0103812
Fbxl17	0.771218	5.18615	2.14682e-07	8.43824e-07	0.653996	3.53598	0.000406263	0.00182844	0.756257	3.00861	0.00262443	0.0127056
Scmh1	1.06418	5.1802	2.2165e-07	8.6963e-07	0.888119	3.86678	0.00011028	0.000567959	0.649943	2.47406	0.0133587	0.0490747
Myo18b	2.64826	5.16214	2.44143e-07	9.54907e-07	1.7334	3.41251	0.000643674	0.0027637	1.28436	2.01322	0.044092	0.124547
Clip2	0.642617	5.13932	2.75738e-07	1.07431e-06	0.779321	4.63569	3.55756e-06	2.3971e-05	0.977577	5.24811	1.53667e-07	1.7959e-06
Tsr2	0.753128	5.13345	2.84479e-07	1.10666e-06	0.593148	3.341	0.000834778	0.00349067	1.36152	6.2581	3.89706e-10	6.2719e-09
Gm26391	1.97625	5.12989	2.89907e-07	1.12719e-06	3.72827	7.72277	1.13832e-14	1.95441e-13	0.258559	0.354733	0.72279	0.835968
Fem1a	0.751698	5.12895	2.91355e-07	1.13224e-06	1.15778	6.00027	1.96985e-09	1.99476e-08	0.837044	3.98576	6.7264e-05	0.000511951
Smarcal1	0.848835	5.12747	2.93654e-07	1.14088e-06	1.27332	6.93122	4.17231e-12	5.5694e-11	1.08647	4.38296	1.1708e-05	0.000101743
Gm23284	1.9763	5.1259	2.96115e-07	1.14956e-06	3.72937	7.69741	1.38853e-14	2.36672e-13	0.255819	0.350813	0.725729	0.837895
Dpp9	0.732679	5.12084	3.04176e-07	1.17782e-06	1.80083	8.17594	2.93566e-16	5.76338e-15	1.05575	4.85378	1.21133e-06	1.23252e-05
Tle3	0.768868	5.11983	3.05808e-07	1.18354e-06	1.03577	5.76002	8.41036e-09	7.92993e-08	0.608903	3.06956	0.00214373	0.0106717
Gm25212	1.97463	5.11773	3.0924e-07	1.19621e-06	3.72376	7.75148	9.08244e-15	1.57087e-13	0.259883	0.355387	0.7223	0.835786
Gas2l2	4.03148	5.11148	3.19641e-07	1.2336e-06	1.42643	2.40237	0.0162893	0.0454862	0.719165	1.08815	0.276528	0.460354
Gm25018	1.97514	5.10839	3.24919e-07	1.25269e-06	3.71683	7.68745	1.50099e-14	2.54609e-13	0.239321	0.327569	0.743238	0.849265
Plk5	3.57125	5.10681	3.27651e-07	1.26258e-06	2.5665	3.75236	0.000175176	0.00085739	1.48492	1.62542	0.104073	0.232357
Fam207a	0.972386	5.08375	3.70047e-07	1.42124e-06	0.920254	3.83112	0.000127561	0.000648196	1.09571	3.52688	0.000420484	0.00263831
Sptbn4	0.620273	5.078	3.81438e-07	1.46424e-06	1.28876	7.43079	1.07952e-13	1.67403e-12	1.59381	8.62159	6.60301e-18	1.98487e-16
Tbcd	0.967051	5.06288	4.12971e-07	1.57688e-06	0.860988	3.78537	0.00015348	0.00076339	0.362636	1.53952	0.123676	0.262398
Clec11a	1.81359	5.0618	4.15326e-07	1.58508e-06	1.32733	3.41229	0.000644204	0.00276513	1.50296	2.74718	0.00601094	0.025567
Kcnb1	0.630016	5.06019	4.18831e-07	1.59805e-06	1.63888	9.61423	6.96307e-22	2.1291e-20	1.39523	5.41476	6.13724e-08	7.54797e-07
4921518K17Rik	2.40875	5.04709	4.48594e-07	1.70644e-06	1.74808	3.52322	0.00042633	0.00190779	1.09345	1.80419	0.0712019	0.176558
Edc4	0.835555	5.04553	4.52273e-07	1.7187e-06	1.41125	6.37522	1.82696e-10	2.07017e-09	0.427918	1.82596	0.0678557	0.170732
Abhd12	0.591016	5.00405	5.61392e-07	2.11582e-06	0.442646	2.93474	0.00333822	0.0118707	0.814593	6.01396	1.81041e-09	2.70803e-08
Gls2	1.2654	5.00272	5.65256e-07	2.12932e-06	1.44889	4.70093	2.58985e-06	1.77994e-05	1.98499	4.43834	9.06552e-06	8.05144e-05
Tatdn2	0.943782	4.99721	5.81655e-07	2.18674e-06	0.685889	3.26167	0.00110758	0.00446964	0.983064	3.63747	0.000275332	0.00180358
Erc1	0.931207	4.99298	5.94548e-07	2.23354e-06	0.89626	4.34778	1.3752e-05	8.40625e-05	0.453052	2.01081	0.0443451	0.125093
Lsm11	1.1058	4.99153	5.99014e-07	2.24865e-06	1.01073	3.81855	0.000134238	0.000677972	0.994318	3.18738	0.0014357	0.00760813
Kcnc3	0.557773	4.98901	6.0688e-07	2.27648e-06	2.1688	11.9055	1.10749e-32	6.78745e-31	1.97145	7.92022	2.37098e-15	5.85951e-14
Rimbp2	0.64486	4.98886	6.07356e-07	2.2777e-06	1.40884	7.68258	1.55914e-14	2.64154e-13	1.12109	3.95616	7.61637e-05	0.000573704
Kmt2b	0.883831	4.98675	6.1402e-07	2.30041e-06	1.08321	5.47856	4.288e-08	3.72879e-07	0.622822	2.57244	0.0100983	0.0390596
Camk2b	0.457149	4.9663	6.82416e-07	2.54907e-06	2.34548	16.0128	1.04099e-57	3.96589e-55	2.13513	10.5997	2.98919e-26	1.71467e-24
Insm1	1.27663	4.96034	7.03701e-07	2.62469e-06	2.61007	7.34635	2.03691e-13	3.10299e-12	2.33469	4.70017	2.59946e-06	2.54154e-05
Wnt9a	1.57711	4.95197	7.34668e-07	2.73344e-06	1.26914	3.58204	0.000340921	0.00156077	1.73472	3.32004	0.000900032	0.00509927
Mmab	1.05525	4.93411	8.05176e-07	2.98476e-06	0.64368	2.92694	0.00342314	0.0121421	1.00345	3.50456	0.000457362	0.00283134
Sh3glb2	0.594372	4.93389	8.06063e-07	2.98731e-06	1.21784	7.56253	3.95308e-14	6.4047e-13	1.64602	9.06266	1.27308e-19	4.47188e-18
Tfe3	0.967276	4.91128	9.04838e-07	3.33539e-06	0.738153	3.3484	0.000812805	0.00340991	0.891359	3.2661	0.0010904	0.00601474
Igsf9b	2.03532	4.88657	1.02608e-06	3.75757e-06	1.17321	2.79285	0.00522454	0.0174763	0.402305	0.796972	0.425467	0.610496
Smarcd1	0.618091	4.88442	1.03734e-06	3.79605e-06	0.995579	5.59396	2.21943e-08	1.99777e-07	1.09163	5.71012	1.12894e-08	1.52455e-07
Tbl3	0.841294	4.88251	1.04745e-06	3.83025e-06	1.64496	7.2291	4.86197e-13	7.13899e-12	0.382729	1.65388	0.0981516	0.222716
Vars	0.888058	4.87487	1.08881e-06	3.97572e-06	1.22256	5.75763	8.53038e-09	8.03235e-08	0.259226	1.17257	0.240967	0.420675
Pknox1	1.31765	4.87385	1.09446e-06	3.99443e-06	0.855116	2.85938	0.00424468	0.014665	1.00961	2.67447	0.00748481	0.0307179
Ccdc106	0.943011	4.87069	1.11207e-06	4.0548e-06	1.39967	5.41521	6.12166e-08	5.23293e-07	1.78486	5.48893	4.04374e-08	5.077e-07
Unc5a	0.555819	4.86645	1.13618e-06	4.13572e-06	2.4051	14.3586	9.40551e-47	1.65725e-44	1.90991	10.2976	7.22282e-25	3.6716e-23
Fam53a	1.17486	4.86283	1.15718e-06	4.2071e-06	0.87394	3.20845	0.0013345	0.00528107	1.42462	3.44	0.000581714	0.00347556
Jmjd4	1.02659	4.8529	1.21669e-06	4.416e-06	0.923488	3.912	9.15341e-05	0.000479474	1.21754	3.20373	0.00135662	0.00727153
Igsf21	0.84246	4.84623	1.25831e-06	4.55721e-06	0.850357	4.08066	4.49076e-05	0.00024981	1.14872	4.25164	2.12211e-05	0.000175509
Lrrc7	0.834434	4.84047	1.2953e-06	4.68558e-06	2.62637	13.317	1.84468e-40	1.98493e-38	1.12724	2.72468	0.0064363	0.0271637
Mfap4	2.35219	4.83522	1.32999e-06	4.79845e-06	1.33563	2.69117	0.00712013	0.0227483	2.72705	3.01245	0.00259149	0.0125851
Jag2	1.0989	4.83345	1.34187e-06	4.83897e-06	1.15286	4.23657	2.26958e-05	0.000133634	0.482187	1.63522	0.102003	0.229127
Tub	0.644747	4.82916	1.37108e-06	4.94197e-06	0.782312	5.02331	5.07888e-07	3.82436e-06	1.32165	5.50491	3.69359e-08	4.67021e-07
B4galnt1	0.611597	4.82477	1.40167e-06	5.0426e-06	1.81013	10.4244	1.91861e-25	7.38927e-24	1.89589	7.6313	2.32406e-14	5.29368e-13
Dscam	0.706585	4.81976	1.43728e-06	5.16702e-06	1.25738	6.96223	3.34933e-12	4.5136e-11	1.15117	5.24857	1.53288e-07	1.79314e-06
Miga2	0.772408	4.80675	1.53407e-06	5.49931e-06	0.618692	3.32967	0.000869504	0.00361343	0.878552	3.93759	8.23058e-05	0.000613369
Mtus2	0.79941	4.78906	1.67561e-06	5.99675e-06	1.40508	6.89379	5.43237e-12	7.1632e-11	1.63138	6.0074	1.88523e-09	2.81659e-08
Lrrc41	0.86976	4.78763	1.68761e-06	6.03538e-06	1.18458	4.93872	7.86368e-07	5.77927e-06	0.809402	3.32682	0.000878441	0.00499768
Eif4h	0.58823	4.78687	1.69402e-06	6.05547e-06	0.874854	5.53959	3.03186e-08	2.69465e-07	1.15024	8.01012	1.14594e-15	2.87173e-14
Bhlhe22	0.687829	4.75472	1.98718e-06	7.04343e-06	1.86206	9.55487	1.23744e-21	3.67996e-20	3.04448	8.40466	4.29103e-17	1.22231e-15
Hspbp1	0.675515	4.73428	2.19834e-06	7.7491e-06	1.29899	6.34247	2.26106e-10	2.5518e-09	1.57251	7.37564	1.63553e-13	3.50812e-12
Trim41	0.813361	4.71318	2.43884e-06	8.55403e-06	0.507692	2.51239	0.0119917	0.0353704	1.07415	3.69255	0.000222014	0.00148862
Zxdb	1.14687	4.70991	2.47828e-06	8.68633e-06	1.10883	4.34689	1.38085e-05	8.4371e-05	1.33142	2.89785	0.00375734	0.0172551
Susd4	0.697195	4.69195	2.70612e-06	9.45203e-06	1.10405	5.55113	2.83824e-08	2.52894e-07	1.21289	5.90397	3.54864e-09	5.12421e-08
Lrrc20	1.05433	4.68361	2.81863e-06	9.8246e-06	1.44372	5.03588	4.75649e-07	3.60083e-06	1.48215	4.25874	2.05581e-05	0.000170703
Lrfn1	0.806926	4.67006	3.01117e-06	1.04547e-05	1.22202	5.54281	2.97659e-08	2.64887e-07	1.46484	4.56362	5.02788e-06	4.67115e-05
Uba1	0.52606	4.66835	3.03623e-06	1.05345e-05	1.23433	8.62149	6.60908e-18	1.49059e-16	0.366536	2.24235	0.0249389	0.0795157
Otub2	0.853518	4.66264	3.12179e-06	1.08164e-05	1.59768	7.33058	2.29151e-13	3.46951e-12	2.36344	7.6871	1.50503e-14	3.50474e-13
Sdk2	1.76332	4.66005	3.16129e-06	1.09382e-05	1.17421	2.88602	0.00390142	0.0136159	1.55283	2.56401	0.010347	0.0398462
Ptprn	0.444497	4.65677	3.21208e-06	1.10962e-05	2.01288	13.2429	4.96024e-40	5.14114e-38	1.69681	11.3767	5.46467e-30	3.97301e-28
Tfr2	1.78208	4.64811	3.34984e-06	1.15536e-05	1.39486	3.33379	0.000856702	0.00357069	2.43005	3.51054	0.00044719	0.00277524
Mtch1	0.440077	4.63649	3.5437e-06	1.21861e-05	0.681155	5.15841	2.49052e-07	1.95469e-06	0.619207	2.95283	0.00314874	0.0148641
Dhx37	1.25272	4.62859	3.6817e-06	1.26291e-05	0.77074	2.43651	0.0148299	0.0421881	0.576463	1.57982	0.114148	0.248291
Abca7	1.50523	4.62728	3.70503e-06	1.27033e-05	0.878485	2.64462	0.00817816	0.0256404	0.153291	0.338055	0.735322	0.844604
Eif3l	0.714627	4.62065	3.82541e-06	1.30834e-05	0.538098	2.90927	0.00362276	0.0127794	0.388668	2.02142	0.0432368	0.122714
Pbx4	1.36844	4.5847	4.54645e-06	1.54273e-05	0.932845	2.79847	0.00513451	0.0172324	2.59099	4.3446	1.39529e-05	0.000119344
Doc2g	3.77115	4.57557	4.74917e-06	1.60755e-05	1.79088	2.48982	0.0127807	0.0373149	1.75599	1.66665	0.0955843	0.218716
Tas1r1	2.48709	4.57382	4.78907e-06	1.62033e-05	1.36457	2.61321	0.0089697	0.0277031	2.1977	2.40595	0.0161306	0.0567232
Bmp1	1.12226	4.57011	4.87468e-06	1.64745e-05	0.785808	2.99777	0.00271966	0.00991115	0.206471	0.544657	0.585989	0.739211
Zfp867	1.49293	4.54641	5.45698e-06	1.83278e-05	0.999457	2.76978	0.00560949	0.0185657	0.871027	1.95816	0.0502114	0.136826
Nos1	0.598824	4.53391	5.79008e-06	1.93819e-05	1.62997	9.36481	7.61849e-21	2.13076e-19	1.26219	6.17299	6.70084e-10	1.04481e-08
Nav1	0.554471	4.5016	6.74428e-06	2.23582e-05	0.879904	5.36321	8.17569e-08	6.87616e-07	0.857714	5.12314	3.00488e-07	3.33712e-06
Caln1	0.633488	4.4971	6.88871e-06	2.2802e-05	1.69904	9.33017	1.05706e-20	2.93891e-19	1.35669	6.48957	8.60794e-11	1.46652e-09
Osbpl7	1.14713	4.46781	7.90244e-06	2.60037e-05	0.922612	3.17743	0.00148584	0.00582438	0.136539	0.420742	0.673944	0.80317
Zfp319	0.997576	4.4663	7.95844e-06	2.61652e-05	1.36214	5.12848	2.92087e-07	2.27473e-06	1.34239	3.47379	0.00051316	0.0031257
Clcn2	0.684125	4.44805	8.66543e-06	2.84093e-05	1.89668	9.29385	1.48809e-20	4.08891e-19	0.387008	1.82831	0.0675034	0.17005
Jpt1	0.615362	4.42644	9.57989e-06	3.12514e-05	1.50304	7.52038	5.46165e-14	8.70899e-13	2.39503	8.04461	8.6519e-16	2.19902e-14
Zfp668	1.1442	4.42131	9.81044e-06	3.19484e-05	1.65382	5.11961	3.06171e-07	2.37392e-06	1.60706	3.64846	0.00026382	0.00173745
Zbtb40	1.40409	4.41301	1.01941e-05	3.31194e-05	1.34359	3.61539	0.000299895	0.00139654	0.684265	1.61702	0.105875	0.235162
Vars2	1.06042	4.41173	1.02548e-05	3.33022e-05	0.993227	3.64389	0.000268549	0.00126774	0.0817167	0.272712	0.785074	0.874753
Hgs	0.693554	4.40946	1.03627e-05	3.36309e-05	0.465709	2.41372	0.0157904	0.0444274	0.705903	3.26915	0.00107872	0.00596078
Klhl26	0.662571	4.39711	1.097e-05	3.55256e-05	1.40413	7.50376	6.20111e-14	9.82145e-13	1.17289	5.79625	6.78149e-09	9.45402e-08
Srrm4	1.06444	4.38914	1.13802e-05	3.67752e-05	1.3334	4.88252	1.04737e-06	7.56725e-06	1.16243	3.06289	0.00219207	0.0108605
Wipf3	0.464266	4.38357	1.16749e-05	3.76631e-05	2.4862	16.3327	5.78073e-60	2.80983e-57	3.06613	12.1556	5.35601e-34	5.58141e-32
Stk11ip	0.969781	4.38333	1.1688e-05	3.76972e-05	1.07992	3.97903	6.91981e-05	0.000371163	0.757531	2.51084	0.0120444	0.0450942
4930404N11Rik	1.28415	4.38042	1.18449e-05	3.81628e-05	0.765577	2.38922	0.016884	0.046896	0.352531	0.912422	0.361547	0.550352
Fam193a	0.879019	4.38037	1.18478e-05	3.81638e-05	0.661701	2.9312	0.00337654	0.0120009	0.155033	0.446118	0.655512	0.790641
Klf16	0.575619	4.37534	1.21244e-05	3.9005e-05	1.65909	8.20592	2.28826e-16	4.53661e-15	1.65811	7.70884	1.26963e-14	2.98434e-13
Carmil3	0.937759	4.36509	1.27073e-05	4.07415e-05	1.74061	6.80951	9.79287e-12	1.25377e-10	0.671274	2.42599	0.0152665	0.0543586
Gpd1	0.533928	4.36221	1.28753e-05	4.12539e-05	1.0238	6.47222	9.65724e-11	1.1241e-09	1.3337	5.75234	8.80191e-09	1.21354e-07
Ccdc88c	0.738214	4.35495	1.33095e-05	4.25821e-05	1.50503	6.52771	6.67841e-11	7.89756e-10	1.28094	4.38483	1.16077e-05	0.000100942
Nptxr	0.477799	4.34506	1.39238e-05	4.44815e-05	2.16608	4.55329	5.28124e-06	3.45931e-05	1.53979	4.95338	7.29358e-07	7.63872e-06
Bend3	1.55094	4.33659	1.4471e-05	4.6103e-05	0.995991	2.62982	0.00854295	0.026636	0.417403	0.888426	0.374311	0.563337
Tmem201	0.656404	4.33598	1.45114e-05	4.62219e-05	0.741695	3.85973	0.000113511	0.000582895	0.438877	1.98582	0.0470534	0.130466
Ppp1r13b	0.609205	4.29469	1.74936e-05	5.51397e-05	0.965116	5.09088	3.56405e-07	2.7393e-06	1.26396	5.95639	2.57864e-09	3.78917e-08
Atp5a1	0.441508	4.28506	1.82693e-05	5.75248e-05	0.767098	5.76016	8.40344e-09	7.92871e-08	0.566073	4.70299	2.56384e-06	2.51063e-05
Slc35c2	0.611162	4.27567	1.90563e-05	5.98284e-05	1.05961	5.52795	3.23991e-08	2.86871e-07	1.23081	5.68301	1.32342e-08	1.76621e-07
Ap3d1	0.49285	4.25116	2.12666e-05	6.63544e-05	1.26025	8.21185	2.17798e-16	4.32406e-15	0.0116762	0.0883827	0.929573	0.960369
Trim37	0.506741	4.24763	2.16048e-05	6.73541e-05	1.29537	8.57011	1.03389e-17	2.30962e-16	1.15626	6.08735	1.14796e-09	1.75707e-08
Phc2	0.619742	4.23213	2.31486e-05	7.19001e-05	0.514908	2.87331	0.00406199	0.0140856	0.480004	2.53468	0.0112549	0.0427141
Fam205a2	1.71694	4.21183	2.5331e-05	7.82446e-05	1.22305	2.8379	0.00454114	0.0155143	1.15673	1.83727	0.0661698	0.167501
Wdr25	1.3307	4.19087	2.77889e-05	8.54179e-05	1.49661	4.02202	5.77014e-05	0.00031493	1.71525	3.27242	0.00106631	0.00590012
Nacad	0.733967	4.1828	2.87944e-05	8.83648e-05	1.0123	4.75836	1.95168e-06	1.35923e-05	0.781233	3.08454	0.00203868	0.0102343
Zbtb16	0.548768	4.18071	2.90606e-05	8.91095e-05	1.29355	7.05486	1.72772e-12	2.40177e-11	0.423554	2.22339	0.0261896	0.0825356
St3gal3	0.661774	4.16329	3.137e-05	9.56282e-05	0.63727	3.02194	0.00251163	0.00924145	1.21376	4.67341	2.9624e-06	2.87615e-05
Ptpru	0.524962	4.15558	3.24468e-05	9.87513e-05	2.18843	12.3003	9.02126e-35	6.55483e-33	1.7263	7.36328	1.79442e-13	3.82923e-12
Gnaz	0.627241	4.14731	3.36404e-05	0.000102117	1.78547	8.45598	2.7676e-17	6.00186e-16	1.22842	5.50267	3.74086e-08	4.7252e-07
Fsd1	0.777763	4.13603	3.53373e-05	0.00010701	0.909442	3.76223	0.000168405	0.000827697	0.875581	2.867	0.00414389	0.0187006
Tars2	0.849155	4.12433	3.71813e-05	0.000112369	1.28717	5.13329	2.84715e-07	2.22346e-06	0.608927	2.24525	0.024752	0.0790087
Gdap1l1	0.637816	4.10279	4.08199e-05	0.00012263	1.25503	5.70576	1.15824e-08	1.07341e-07	0.517875	2.40921	0.0159872	0.0563473
Atrip	0.893626	4.09514	4.21905e-05	0.000126371	0.994132	3.71318	0.000204668	0.000986325	1.05531	3.17018	0.00152344	0.007981
Tubgcp6	0.836825	4.07928	4.51749e-05	0.000134776	1.52029	5.20829	1.90586e-07	1.52124e-06	0.40223	1.47758	0.13952	0.284989
Epn2	0.521173	4.077	4.5621e-05	0.000136026	0.906077	5.65533	1.55546e-08	1.4256e-07	0.854443	4.56444	5.00828e-06	4.6564e-05
Ankrd17	0.493057	4.07609	4.57998e-05	0.000136532	0.673138	4.18881	2.80418e-05	0.000162465	0.798083	5.16081	2.45889e-07	2.78068e-06
Pi4ka	0.430414	4.07393	4.62259e-05	0.000137748	1.65854	11.7	1.27474e-31	7.30434e-30	0.66276	4.99012	6.03418e-07	6.411e-06
Hap1	0.593997	4.07352	4.63085e-05	0.000137967	1.14847	6.26956	3.62076e-10	3.98425e-09	0.752976	2.89692	0.00376848	0.0172994
Ablim2	0.581912	4.0493	5.13707e-05	0.00015203	0.865266	4.70795	2.5022e-06	1.7239e-05	1.28838	5.52764	3.24567e-08	4.1289e-07
Sh2b1	0.554287	4.03613	5.43408e-05	0.000160349	0.613817	3.42393	0.00061723	0.00266151	1.27863	6.17323	6.69072e-10	1.04481e-08
Chpf	0.509575	4.01624	5.91333e-05	0.000173576	1.83372	9.74941	1.85551e-22	5.89081e-21	1.53692	7.39017	1.46637e-13	3.16154e-12
Ydjc	0.892777	4.01467	5.95292e-05	0.000174637	1.83231	6.45915	1.05292e-10	1.21956e-09	1.95366	4.618	3.87453e-06	3.69855e-05
Extl3	0.485212	3.99284	6.52855e-05	0.000190673	0.44389	2.81317	0.00490555	0.0165745	0.14432	0.937346	0.34858	0.53636
Vps52	0.533121	3.98	6.8914e-05	0.000200572	0.802814	4.54808	5.41363e-06	3.53617e-05	0.484767	2.68247	0.00730803	0.0300516
Aars2	0.836593	3.9723	7.11826e-05	0.000206857	1.42476	5.0426	4.59252e-07	3.48418e-06	0.893017	2.55182	0.0107163	0.0409809
Poldip3	0.615092	3.96839	7.23608e-05	0.000209998	0.90857	4.60713	4.08262e-06	2.72613e-05	0.768555	3.96439	7.3584e-05	0.000555657
Rubcn	0.658054	3.96366	7.38095e-05	0.000213751	0.511872	2.71909	0.00654612	0.0211675	0.510369	1.93388	0.0531285	0.142732
Cry2	0.509213	3.96116	7.4586e-05	0.00021571	0.766272	4.54624	5.46138e-06	3.56405e-05	0.626693	3.36667	0.000760812	0.00441383
Mib1	0.618253	3.94293	8.04937e-05	0.000231732	0.392299	2.45823	0.0139624	0.0401826	0.369331	1.66476	0.0959615	0.219145
Mbtps1	0.587747	3.91865	8.90464e-05	0.000255489	0.619506	3.51269	0.000443596	0.00197565	0.613876	2.97798	0.00290153	0.0138593
Zmym3	0.565299	3.90895	9.26992e-05	0.000265605	1.18337	6.68022	2.38579e-11	2.94227e-10	1.0668	5.04703	4.48733e-07	4.87525e-06
Cxcr5	2.5842	3.90759	9.32207e-05	0.000266896	1.81863	2.68727	0.00720381	0.0229896	1.79022	1.84898	0.0644607	0.164339
Mapt	0.399477	3.89953	9.63808e-05	0.000275287	0.785423	5.78739	7.14891e-09	6.79966e-08	0.815326	6.67478	2.4761e-11	4.42338e-10
Ttc34	1.44877	3.89414	9.85465e-05	0.000280975	1.77441	4.08129	4.47864e-05	0.000249234	1.98879	2.54643	0.0108832	0.0415076
Stk32c	0.682595	3.89313	9.89578e-05	0.000282041	1.31879	5.8253	5.70089e-09	5.48531e-08	0.673133	2.61528	0.00891537	0.0354038
Snrk	0.504341	3.8882	0.00010099	0.000287616	0.492641	3.11113	0.00186375	0.00710807	0.0585665	0.365645	0.71463	0.830989
Sphk2	0.737263	3.88723	0.000101396	0.000288501	0.796295	3.50351	0.000459161	0.00203661	0.656418	2.45713	0.0140051	0.0508964
Arhgef28	0.595997	3.86527	0.000110965	0.000314483	1.67115	8.48854	2.09247e-17	4.56585e-16	1.09635	3.61326	0.000302374	0.00196834
Akt3	0.496612	3.84187	0.000122102	0.000344048	0.444023	2.85272	0.00433468	0.0149464	1.07434	5.51812	3.4265e-08	4.34568e-07
Eif4g1	0.455637	3.83211	0.000127049	0.000357454	0.759331	5.04291	4.58498e-07	3.48034e-06	0.740584	4.51621	6.29554e-06	5.7548e-05
Helz	0.747735	3.79444	0.000147977	0.000412648	1.22154	5.13086	2.88427e-07	2.24996e-06	0.406182	1.25011	0.211258	0.382644
Nhsl2	0.58087	3.78576	0.000153237	0.000426373	1.86056	8.21261	2.16435e-16	4.30914e-15	0.86737	3.42769	0.000608742	0.00361116
Cpeb3	0.697199	3.78373	0.000154494	0.000429792	1.04206	4.74024	2.1347e-06	1.4823e-05	0.633288	1.86897	0.0616275	0.15893
Frg2f1	1.56131	3.7774	0.000158474	0.000439891	1.15925	2.7446	0.00605839	0.0198603	1.27578	2.1614	0.0306643	0.0935945
Trappc9	0.543949	3.77549	0.000159694	0.000443117	1.40651	7.43493	1.04627e-13	1.62425e-12	0.269069	1.3944	0.163197	0.319871
Habp4	0.492569	3.77384	0.000160752	0.000445641	0.844203	5.27995	1.29222e-07	1.06025e-06	1.66009	8.26925	1.34808e-16	3.72959e-15
Sidt2	0.595053	3.76859	0.000164172	0.000454374	0.483297	2.736	0.00621903	0.0202925	0.216514	1.05835	0.289897	0.474622
Ccdc92b	0.650408	3.7581	0.000171208	0.000472894	1.72387	7.35928	1.84909e-13	2.82698e-12	2.16042	5.60927	2.03179e-08	2.64387e-07
9130019P16Rik	0.97462	3.74285	0.000181946	0.000501545	2.14351	6.17752	6.51143e-10	6.98517e-09	2.25962	4.24222	2.21323e-05	0.000182562
Plxna1	0.408514	3.73964	0.000184284	0.00050762	2.47133	13.5408	8.97678e-42	1.12979e-39	1.35273	5.81642	6.01228e-09	8.4004e-08
Slc36a1	0.598566	3.73358	0.000188779	0.00051953	1.27915	5.22276	1.76277e-07	1.41746e-06	1.1804	4.91232	9.00031e-07	9.32468e-06
Ppargc1b	0.908188	3.71945	0.000199661	0.000546986	1.18	4.06903	4.72092e-05	0.000261603	0.717336	2.09213	0.0364273	0.10746
Pcnx	0.45999	3.71794	0.000200856	0.00055006	1.22129	6.9711	3.14481e-12	4.25424e-11	0.921055	4.92942	8.24757e-07	8.59465e-06
Tecpr2	0.515351	3.70773	0.000209123	0.00057084	1.66069	8.00906	1.15593e-15	2.15245e-14	0.407296	1.81771	0.0691083	0.17288
Adgrb1	0.399882	3.70658	0.000210074	0.000572927	1.15802	8.2858	1.17315e-16	2.41061e-15	0.953827	7.67778	1.61871e-14	3.74158e-13
Ppm1h	0.602312	3.67419	0.000238605	0.000645488	0.934796	4.69257	2.69799e-06	1.84975e-05	0.384998	1.64346	0.100287	0.225921
Qars	0.67064	3.67193	0.000240725	0.000650641	0.657547	3.0074	0.00263494	0.00962979	0.658118	2.66627	0.00766981	0.0312923
Kpna6	0.567378	3.66913	0.000243377	0.000656637	1.34967	7.56958	3.74434e-14	6.08769e-13	0.606946	2.98285	0.00285578	0.0136721
Cacng8	0.433624	3.63634	0.000276542	0.000739908	2.36675	13.2486	4.5999e-40	4.83882e-38	1.78864	7.29057	3.08657e-13	6.40093e-12
Cfap410	0.778602	3.62478	0.000289209	0.000771478	0.753643	2.8479	0.00440089	0.0151305	1.1078	3.19448	0.00140083	0.0074733
Crlf1	0.893077	3.61578	0.000299439	0.000797643	1.5108	4.67159	2.98877e-06	2.03427e-05	1.33679	3.03158	0.00243279	0.0119022
Bcor	1.00498	3.60693	0.000309843	0.00082318	1.04149	3.34853	0.000812422	0.00340976	1.28673	3.46922	0.00052197	0.0031701
Tlnrd1	0.603253	3.60008	0.000318119	0.000843389	1.21557	5.37025	7.86256e-08	6.62863e-07	1.59243	5.14566	2.66584e-07	2.9898e-06
Rusc1	0.475568	3.58938	0.000331464	0.000876004	2.01942	11.5006	1.3099e-30	6.91551e-29	1.04791	6.02538	1.6871e-09	2.53572e-08
Trim71	2.20673	3.5883	0.000332839	0.00087933	2.26037	3.15843	0.0015862	0.00616971	0.639356	0.843316	0.399052	0.587558
Tcte1	1.7788	3.57256	0.00035351	0.000929392	1.28682	2.46423	0.0137306	0.0396177	2.51826	2.56904	0.0101982	0.0393729
LOC432842	1.1927	3.55178	0.000382628	0.00100159	1.22586	3.24943	0.00115638	0.00465458	1.21356	2.20812	0.027236	0.0851892
Vstm2l	0.43461	3.54882	0.000386963	0.00101196	1.29971	7.01629	2.27844e-12	3.12421e-11	1.14387	6.31648	2.67591e-10	4.37416e-09
H1fx	0.606367	3.54506	0.000392523	0.00102554	1.21764	5.85266	4.8377e-09	4.71266e-08	1.71243	5.93464	2.94491e-09	4.28709e-08
Prkce	0.382012	3.53813	0.000402972	0.00105084	1.88203	14.0166	1.23307e-44	1.95297e-42	1.92706	15.8134	2.51654e-56	1.16136e-53
Ttc17	0.771177	3.53399	0.000409336	0.00106578	1.10547	4.4313	9.36661e-06	5.90482e-05	0.315061	0.926445	0.354215	0.542846
Arvcf	0.811843	3.53337	0.000410291	0.0010679	0.661597	2.56338	0.0103657	0.031268	0.281003	0.788713	0.43028	0.614301
Hnrnpl	0.427743	3.52887	0.000417332	0.00108511	0.555123	3.67686	0.000236125	0.00112599	0.174125	1.01268	0.311215	0.497689
Arhgef11	0.527867	3.52562	0.000422491	0.0010972	1.32229	7.03368	2.01157e-12	2.77176e-11	0.378299	1.88991	0.0587696	0.153727
Klhl22	0.510069	3.52067	0.000430466	0.00111637	1.36933	6.91217	4.77292e-12	6.31728e-11	1.01469	4.9774	6.4443e-07	6.80625e-06
Cdk9	0.533303	3.50536	0.000455982	0.0011779	0.523589	2.88464	0.00391867	0.0136625	0.789238	3.64903	0.000263235	0.00173524
Ulk4	1.41384	3.50153	0.000462597	0.00119417	1.27745	2.88247	0.00394568	0.0137465	0.735392	1.24818	0.211966	0.383593
Ddx56	0.76778	3.49541	0.000473332	0.00122009	0.878049	3.03965	0.00236857	0.0087954	1.10834	3.37245	0.000745019	0.00433941
Pi4kb	0.618122	3.4904	0.000482295	0.00124036	0.917843	4.04011	5.34264e-05	0.000293606	0.197576	0.868519	0.38511	0.573925
Cc2d1a	0.645857	3.47463	0.000511556	0.00131071	0.812664	3.61541	0.000299873	0.00139654	0.747907	2.90855	0.0036311	0.0167368
Pcdh1	0.405676	3.4596	0.000540986	0.00138027	2.29046	10.3203	5.70407e-25	2.11591e-23	1.08833	4.98174	6.30157e-07	6.66113e-06
Gmeb2	0.874555	3.44462	0.000571863	0.00145389	1.01063	3.50865	0.000450392	0.00200086	1.06445	2.39513	0.0166145	0.0580185
Cpne5	0.702792	3.44012	0.000581463	0.00147607	0.933486	4.00053	6.32014e-05	0.000341729	0.640826	2.03406	0.0419453	0.120007
Abhd17c	0.56009	3.43969	0.000582375	0.00147813	0.504561	2.42115	0.0154714	0.0437047	1.05184	4.40571	1.05436e-05	9.2655e-05
Gtf3c1	0.443064	3.41399	0.000640179	0.00161455	1.25472	7.41414	1.22414e-13	1.89205e-12	0.276476	1.31612	0.188135	0.35219
Srgap3	0.368857	3.41043	0.000648595	0.00163441	0.786243	5.18665	2.14109e-07	1.6927e-06	0.603412	2.47915	0.0131696	0.0485082
Ppp2r1a	0.329217	3.37937	0.000726515	0.00181623	1.22506	8.0919	5.87395e-16	1.11891e-14	1.29994	8.63914	5.6636e-18	1.71485e-16
Lrfn3	0.651369	3.37653	0.000734052	0.00183325	1.10644	4.6648	3.08918e-06	2.09754e-05	1.43663	4.09858	4.157e-05	0.000328919
Celf5	0.371202	3.37575	0.000736156	0.0018382	1.25351	8.17309	3.00602e-16	5.86881e-15	1.72524	11.0048	3.6248e-28	2.34861e-26
Fam160b2	0.580057	3.36022	0.000778801	0.00193764	0.829662	3.84819	0.000118995	0.000609504	1.19729	4.21881	2.456e-05	0.000200996
Cds2	0.362551	3.35611	0.000790464	0.00196349	0.880053	5.43508	5.47708e-08	4.71337e-07	0.859866	5.92164	3.18752e-09	4.61876e-08
Anks1b	0.434071	3.35334	0.000798429	0.00198159	1.17627	8.27169	1.32077e-16	2.6943e-15	1.48862	8.74116	2.30732e-18	7.28614e-17
Atp6v0a1	0.339093	3.3392	0.000840211	0.0020788	1.2329	8.66425	4.54513e-18	1.03503e-16	0.757523	6.38593	1.70355e-10	2.82532e-09
Usp2	0.506945	3.33215	0.000861789	0.00212766	0.67058	3.77523	0.00015986	0.000791776	0.348813	1.68759	0.0914894	0.211591
Wwc2	0.582617	3.33006	0.00086828	0.00214229	0.862357	4.52606	6.00941e-06	3.89465e-05	0.809237	3.48811	0.000486447	0.00298441
Herc2	0.380797	3.31723	0.000909134	0.00223688	1.63084	11.0707	1.73978e-28	8.14747e-27	0.369671	2.36964	0.0178055	0.0612706
Tmem143	0.79569	3.3063	0.000945367	0.00232036	1.10948	3.83912	0.000123477	0.00062903	0.280425	0.906221	0.364819	0.554052
Kcnk12	0.908329	3.30384	0.000953709	0.0023397	1.66728	4.86582	1.13986e-06	8.1893e-06	1.94484	3.76678	0.000165368	0.00114949
Sugp2	0.494879	3.28625	0.0010153	0.00247553	1.5242	7.09132	1.32843e-12	1.88007e-11	0.782855	2.6991	0.00695281	0.028972
Fbxl15	0.86098	3.28484	0.00102041	0.00248679	1.11706	3.63656	0.000276303	0.00130086	1.61922	3.28205	0.00103056	0.00573018
Tpgs1	0.564069	3.2789	0.00104212	0.00253709	0.954248	4.51592	6.30425e-06	4.06703e-05	1.24034	4.74487	2.08642e-06	2.06905e-05
Gosr1	0.618896	3.25646	0.00112811	0.00273427	0.551403	2.53426	0.0112686	0.033525	0.98933	3.0883	0.00201307	0.0101302
Map7d1	0.362615	3.25647	0.00112809	0.00273427	0.887392	5.57279	2.50692e-08	2.24365e-07	0.914741	6.55695	5.49203e-11	9.55186e-10
Foxj2	0.632198	3.2474	0.00116463	0.00281737	0.656424	3.00781	0.00263138	0.00961929	0.756573	2.85749	0.00427006	0.0191525
Dapk3	0.538067	3.24405	0.00117845	0.00284851	1.23132	5.79314	6.9083e-09	6.57969e-08	0.730624	3.10056	0.00193155	0.00977105
Azin2	0.743251	3.24035	0.00119384	0.00288295	0.828396	3.04612	0.00231816	0.0086355	0.849749	2.42966	0.0151132	0.0539768
Dbn1	0.442177	3.23671	0.00120917	0.00291625	0.898408	5.33739	9.42946e-08	7.89297e-07	1.61638	7.18191	6.87461e-13	1.40699e-11
Eif2b5	0.553858	3.22199	0.00127302	0.00306099	0.516553	2.48424	0.0129829	0.0378191	0.497767	2.17799	0.0294065	0.0904175
Nle1	1.20154	3.21663	0.00129707	0.00311506	1.03721	2.5783	0.00992891	0.0302024	0.695084	1.17131	0.241472	0.421322
Dhx38	0.597603	3.21425	0.00130786	0.00313824	1.0591	4.56388	5.0216e-06	3.30614e-05	0.195764	0.799753	0.423854	0.609389
Spire2	0.914054	3.19378	0.00140424	0.00335194	0.957909	3.03177	0.00243128	0.00899984	2.05089	3.9064	9.36811e-05	0.000689919
Rfx1	0.727504	3.18779	0.00143367	0.0034168	0.983979	3.64353	0.00026892	0.00126907	0.855131	2.43685	0.0148159	0.0531781
Man1b1	0.474496	3.18091	0.00146814	0.00349399	0.456161	2.6431	0.00821498	0.0257273	0.78207	3.54421	0.000393789	0.00248703
Unc13a	0.348368	3.17696	0.00148826	0.00353966	2.16923	12.3786	3.41142e-35	2.57152e-33	1.06624	5.41472	6.13858e-08	7.54797e-07
Pcnx2	0.3738	3.16552	0.00154808	0.00367325	2.47009	13.8584	1.13134e-43	1.67867e-41	1.49001	6.42049	1.35834e-10	2.28615e-09
Rrp9	0.864841	3.1635	0.00155885	0.00369707	1.01493	3.22402	0.00126404	0.00503758	0.881748	2.24904	0.0245099	0.0785284
G630025P09Rik	2.75655	3.15504	0.00160476	0.00379524	2.60794	2.61883	0.00882312	0.0273282	1.051	0.929504	0.352628	0.54099
Gcn1	0.449427	3.15075	0.00162851	0.00384839	0.937179	5.1321	2.8653e-07	2.2364e-06	0.54793	2.28137	0.0225268	0.0734546
Pnpla6	0.574146	3.14813	0.00164317	0.0038788	0.810141	3.73553	0.00018732	0.000911134	0.0776129	0.265887	0.790327	0.877646
Tiam1	0.701846	3.13919	0.00169418	0.00398737	0.65474	2.74998	0.00595994	0.0195694	0.26349	0.923483	0.355756	0.544586
Sec16a	0.554558	3.12467	0.00178005	0.00417194	0.934206	4.58558	4.52722e-06	2.99745e-05	0.306546	1.39492	0.16304	0.319714
Dcaf8	0.446141	3.11816	0.00181984	0.00425793	0.481602	2.87875	0.0039926	0.0138859	0.0667265	0.397197	0.691222	0.815524
Slc9a8	0.68625	3.11323	0.0018505	0.00432432	0.684114	2.74775	0.00600063	0.0196846	0.258007	0.903604	0.366205	0.55555
Ep300	0.523054	3.10869	0.00187916	0.00438316	0.737061	3.46416	0.00053189	0.00233204	0.47329	1.64987	0.0989694	0.224002
Lrrc73	0.530797	3.09802	0.00194817	0.00453364	1.31278	6.23332	4.56649e-10	4.986e-09	1.56421	5.67313	1.40213e-08	1.86329e-07
Nr4a3	0.418289	3.09527	0.00196632	0.00457086	1.9456	9.59456	8.42719e-22	2.55462e-20	1.61247	6.06967	1.28175e-09	1.94991e-08
Ccdc177	0.61352	3.09144	0.0019919	0.00462472	1.8061	6.65289	2.87395e-11	3.53192e-10	1.65104	4.33554	1.45405e-05	0.000124023
Nefl	0.35874	3.08808	0.00201452	0.00466792	2.03258	13.6005	3.9772e-42	5.2395e-40	1.63387	7.83686	4.61951e-15	1.11735e-13
Tysnd1	0.704559	3.07728	0.00208899	0.00482421	0.782764	2.87126	0.00408843	0.0141633	0.338728	1.00704	0.313914	0.500253
Asphd1	0.593527	3.07499	0.00210507	0.0048554	0.998482	4.14581	3.3861e-05	0.000193319	1.64883	5.4984	3.8326e-08	4.8216e-07
Kalrn	0.321069	3.07213	0.00212535	0.00489994	1.92453	12.4956	7.88786e-36	6.28177e-34	1.59705	6.94425	3.80466e-12	7.34217e-11
Ddx49	0.696788	3.06678	0.00216378	0.00498474	0.741679	2.84392	0.00445618	0.0152684	0.237102	0.763134	0.445384	0.62734
Cdk13	0.535555	3.05994	0.00221384	0.00508922	1.53173	6.5486	5.80773e-11	6.92604e-10	0.621323	2.12825	0.0333167	0.0999343
Egr3	0.379436	3.04723	0.00230958	0.00529559	2.27736	11.8469	2.23343e-32	1.334e-30	2.70127	10.3501	4.18134e-25	2.19696e-23
Map4	0.322875	3.03697	0.00238966	0.00546348	1.16867	7.6603	1.85505e-14	3.11667e-13	0.979621	8.62628	6.33816e-18	1.90985e-16
Tmprss9	2.51684	3.03334	0.00241866	0.0055256	3.81657	3.28499	0.00101987	0.00414776	1.48054	1.28894	0.197418	0.364816
C2cd4c	1.3223	3.02712	0.00246897	0.00563203	1.41191	2.76682	0.00566061	0.0187094	1.06011	1.66573	0.0957682	0.218946
C2cd3	0.644043	3.01813	0.0025434	0.00578958	0.77917	3.07672	0.00209292	0.00789238	0.00230582	0.00712523	0.994315	0.996997
Dhx30	0.466579	3.01207	0.00259477	0.00589587	1.04811	5.48221	4.20056e-08	3.65952e-07	0.613874	3.1891	0.00142716	0.0075782
Prdm2	0.440437	3.0112	0.00260218	0.00590914	1.1208	6.57142	4.98364e-11	5.98886e-10	1.20113	5.53788	3.06151e-08	3.91472e-07
Cnnm1	0.393779	3.00937	0.00261788	0.00594212	1.64317	9.56496	1.12242e-21	3.35205e-20	1.39339	6.36889	1.90404e-10	3.14947e-09
Gnb2	0.333004	3.00731	0.00263569	0.0059773	0.86193	5.95813	2.55134e-09	2.55787e-08	0.0222466	0.163837	0.869859	0.925509
Abl2	0.452718	2.99821	0.00271572	0.00613839	0.883255	4.92694	8.35266e-07	6.11632e-06	0.641553	2.41763	0.0156222	0.0554356
Glyr1	0.481781	2.98266	0.00285756	0.00643206	1.39179	7.65185	1.98106e-14	3.31257e-13	0.758227	1.26753	0.204966	0.374175
Urgcp	0.436966	2.97961	0.0028862	0.00649169	1.15716	5.12133	3.03381e-07	2.35618e-06	0.470592	2.33087	0.0197602	0.0663359
Hmgxb3	0.49585	2.96871	0.00299049	0.0067083	1.35434	6.05009	1.44761e-09	1.48512e-08	1.12908	3.74296	0.000181865	0.00124957
Hsf4	1.13591	2.95608	0.00311574	0.00696754	1.4165	3.18441	0.00145052	0.0056954	1.4706	2.36699	0.0179332	0.0616423
Kif17	0.662297	2.92926	0.00339766	0.00754111	1.29004	4.26417	2.00643e-05	0.000118984	0.998752	2.83147	0.00463349	0.0205104
Ampd2	0.449824	2.90838	0.00363302	0.0080129	1.1659	5.40752	6.39049e-08	5.44292e-07	0.559045	2.52197	0.0116698	0.0439287
Actr1b	0.349476	2.90346	0.00369064	0.00812811	1.37573	8.01239	1.12501e-15	2.10599e-14	0.825799	5.00626	5.54964e-07	5.94659e-06
Tro	0.374333	2.90137	0.00371534	0.00818014	1.81029	9.84409	7.2694e-23	2.38301e-21	1.2213	4.62266	3.78853e-06	3.61922e-05
Pcdh17	0.419817	2.88251	0.00394517	0.00864586	0.741462	4.18636	2.83467e-05	0.000163962	0.352073	1.75101	0.0799445	0.192214
Kctd1	0.425324	2.8788	0.00399186	0.00874058	1.27313	7.21103	5.55288e-13	8.12808e-12	1.48947	7.07434	1.50162e-12	2.99009e-11
Nlgn2	0.288913	2.87378	0.00405594	0.0088719	1.39392	9.99779	1.55838e-23	5.30601e-22	0.84684	6.67677	2.44264e-11	4.36985e-10
Cluh	0.448421	2.87072	0.00409534	0.00894772	0.683644	3.71543	0.000202854	0.00097993	0.14646	0.782595	0.433865	0.617374
Fam168a	0.355714	2.84235	0.00447822	0.00971128	0.463306	3.26542	0.001093	0.00441714	0.465756	2.83173	0.00462968	0.0205104
Klhl3	0.738633	2.83666	0.00455888	0.00986638	1.78313	5.31551	1.06361e-07	8.8296e-07	1.04249	2.12637	0.0334725	0.100305
Fxr2	0.393262	2.83292	0.00461252	0.00997103	0.774754	4.38315	1.16976e-05	7.22881e-05	0.577631	3.34831	0.000813062	0.00466392
Cabin1	0.450522	2.83264	0.00461655	0.00997833	1.54284	7.94739	1.90479e-15	3.46899e-14	0.256933	1.0837	0.278499	0.462009
Ap1s3	0.632788	2.81731	0.00484283	0.0104197	1.21822	4.49857	6.84117e-06	4.39531e-05	0.385778	1.32718	0.184448	0.347368
Mir6236	1.96048	2.80385	0.00504956	0.0108383	1.51202	10.3306	5.12648e-25	1.92188e-23	0.349981	0.962222	0.335938	0.524
Icam5	0.270567	2.80377	0.00505088	0.0108396	2.42697	15.2208	2.5744e-52	6.72012e-50	1.86482	9.18601	4.07696e-20	1.49508e-18
Ccdc22	0.697949	2.79369	0.00521106	0.0111564	1.0706	3.66986	0.000242681	0.00115491	0.438951	1.29651	0.1948	0.361474
Klhl18	0.668742	2.77759	0.00547635	0.011688	0.779623	2.84264	0.00447417	0.0153152	0.334456	1.05083	0.293335	0.478347
Atxn2l	0.429292	2.75763	0.00582229	0.0123565	0.762131	3.63015	0.000283262	0.00132976	0.119475	0.567487	0.570384	0.726125
Lars2	1.95807	2.75261	0.00591229	0.0125197	1.55962	2.80249	0.00507101	0.017064	0.300027	0.787026	0.431267	0.615217
Senp3	0.421455	2.7518	0.00592695	0.0125469	0.741907	3.9278	8.57249e-05	0.000452407	0.786107	3.66828	0.000244186	0.00162337
Rxrg	1.06949	2.7472	0.00601061	0.0127116	1.33193	2.84624	0.00442388	0.0151956	1.33706	2.10297	0.035468	0.105167
Tsc22d2	0.533377	2.74057	0.0061332	0.0129582	1.19454	5.12438	2.98512e-07	2.32092e-06	0.908235	3.27516	0.00105602	0.0058509
Rtl6	0.403984	2.72243	0.0064804	0.0136498	1.32017	6.59458	4.26455e-11	5.14667e-10	1.55392	5.4542	4.91944e-08	6.12116e-07
Gm11127	1.97974	2.71016	0.00672517	0.0141201	1.93323	2.43995	0.0146895	0.0419241	0.119421	0.141356	0.887589	0.935702
Bicral	0.495772	2.70875	0.00675378	0.0141703	0.724477	3.51259	0.000443768	0.00197579	0.705386	2.45698	0.0140109	0.0509026
Syn1	0.308172	2.70726	0.00678403	0.0142212	1.84834	11.4999	1.32124e-30	6.94933e-29	1.7612	7.67814	1.61421e-14	3.73809e-13
Mier2	0.608159	2.68372	0.0072807	0.0151434	0.822719	3.25861	0.0011196	0.00451685	0.52003	1.7326	0.0831661	0.197554
B4galnt4	0.44577	2.66873	0.00761389	0.0157908	1.54138	6.942	3.86582e-12	5.18483e-11	0.976099	3.6185	0.000296317	0.00193294
Bptf	0.316273	2.65562	0.00791633	0.0163552	1.31097	8.39673	4.5907e-17	9.71629e-16	0.472619	2.81787	0.0048344	0.0212045
Sec22c	0.497436	2.64527	0.00816253	0.0168307	0.854828	3.50996	0.000448173	0.00199414	0.671362	2.45195	0.0142085	0.0514842
Trpc4ap	0.303169	2.63472	0.00842055	0.01732	0.923358	6.1511	7.69464e-10	8.18594e-09	0.220388	1.49346	0.135316	0.279322
Pygo2	0.443535	2.6347	0.00842127	0.01732	0.681122	3.29912	0.00096989	0.00397892	0.912496	3.51662	0.000437087	0.002722
Polrmt	0.659863	2.63246	0.00847702	0.0174089	0.676605	2.41017	0.015945	0.044764	0.042335	0.121596	0.903219	0.944619
Cramp1l	0.611218	2.61307	0.00897337	0.0183535	0.793992	2.73432	0.0062509	0.0203823	0.541888	1.78043	0.0750049	0.183754
2020-09-09	0.311345	2.61286	0.00897891	0.0183598	1.4843	8.89582	5.7988e-19	1.38308e-17	1.00577	5.77115	7.8732e-09	1.0891e-07
Sult4a1	0.266714	2.59344	0.00950206	0.0193302	1.4594	9.73389	2.16163e-22	6.81664e-21	1.34826	8.7774	1.67304e-18	5.37824e-17
Fam189b	0.479084	2.59164	0.009552	0.0194187	1.75832	7.15136	8.59244e-13	1.2397e-11	0.681738	2.1201	0.0339973	0.101465
Atcay	0.295053	2.56952	0.0101839	0.0205789	1.11578	6.84227	7.79475e-12	1.01267e-10	1.40495	7.4112	1.25158e-13	2.7031e-12
Usp20	0.420337	2.5685	0.0102141	0.0206342	1.65325	7.30612	2.74964e-13	4.14091e-12	0.939802	2.85066	0.00436291	0.019499
Celsr3	0.501004	2.56835	0.0102183	0.0206373	1.13448	4.70172	2.57984e-06	1.77392e-05	0.947226	2.81527	0.00487366	0.0213468
Ggt7	0.336152	2.56423	0.0103406	0.0208592	1.79151	9.91064	3.74243e-23	1.25603e-21	0.85105	4.25674	2.07429e-05	0.000172009
Trrap	0.360223	2.55017	0.0107671	0.0216329	0.978818	5.57946	2.41272e-08	2.16346e-07	0.222703	0.944378	0.344977	0.532782
Ddx23	0.382658	2.54583	0.0109017	0.0218657	0.679514	3.68919	0.000224965	0.00107774	0.281465	1.34541	0.178494	0.339899
Nckipsd	0.405794	2.54018	0.0110795	0.0221723	0.86262	4.41486	1.01076e-05	6.32947e-05	1.13659	3.63963	0.00027303	0.00179131
Map3k12	0.339778	2.53143	0.0113598	0.02267	1.02101	5.81805	5.95397e-09	5.71322e-08	0.683849	3.12361	0.00178646	0.0091481
Pde2a	0.260722	2.5295	0.0114226	0.0227834	1.75426	11.5498	7.39757e-31	4.03422e-29	1.65498	10.6363	2.019e-26	1.16348e-24
Thbd	0.556618	2.50726	0.0121673	0.0241477	1.26177	4.60615	4.10196e-06	2.73775e-05	0.63221	1.92491	0.0542403	0.144962
Sik3	0.283891	2.49977	0.0124275	0.024606	1.16988	7.72418	1.1258e-14	1.93528e-13	0.292295	1.83645	0.0662905	0.16767
AU040320	0.361184	2.49978	0.012427	0.024606	0.982075	5.47742	4.31564e-08	3.75051e-07	0.407277	1.788	0.0737753	0.181463
Grm4	0.835733	2.48382	0.0129983	0.0256487	1.07726	2.70532	0.00682389	0.0219411	1.17656	2.02335	0.0430369	0.122202
Capn10	0.562119	2.47338	0.0133841	0.026331	0.63697	2.37585	0.0175085	0.0483257	0.88931	2.63883	0.00831938	0.0334585
Fkbp5	0.387774	2.46726	0.0136152	0.026737	1.17391	5.88314	4.02553e-09	3.95153e-08	1.89209	5.90256	3.57913e-09	5.16229e-08
[truncated: 36 more rows]

## Sheet: Table S3 RNAscope probes
Gene	Reagent	Catalog Number	Content
[truncated: 17 more rows]

[truncated: 8 more sheets: Table S4 diff. loc. 3'UTRs, Table S5 diff. loc. AS events , Table S6 RNABP KO data used, Table S7 CLIP scores, Table S8 dendritic FMRP targets, Table S9 FM1-3 clusters, Table S10 ASD clusters, Table S11 FMRP KO vs WT TRAP]
